# Supplementary material
Source: publisher figshare collection journal article supplement (https://tandf.figshare.com/articles/dataset/_/4793563)
Supplement: Supplementary file 2 [file 1]

64/2014 - 23 April 2014

Provision of deficit and debt data for 2013 - first notification

## Euro area and EU28 government deficit at 3.0% and 3.3% of GDP respectively

### Government debt at 92.6% and 87.1%

In 2013, the government deficit<sup>1</sup> of both the **euro area**<sup>2</sup> (EA18) and the **EU28**<sup>2</sup> decreased in absolute terms compared with 2012, while the government debt<sup>1</sup> rose in both zones. In the **euro area** the government deficit to GDP ratio decreased from 3.7% in 2012 to 3.0% in 2013, and in the **EU28**<sup>3</sup> from 3.9% to 3.3%. In the **euro area** the government debt to GDP ratio increased from 90.7% at the end of 2012 to 92.6% at the end of 2013, and in the **EU28**<sup>3</sup> from 85.2% to 87.1%.

|                                      |                | 2010       | 2011       | 2012       | 2013       |
|--------------------------------------|----------------|------------|------------|------------|------------|
| <b>Euro area (EA18)</b>              |                |            |            |            |            |
| GDP market prices (mp)               | (million euro) | 9 185 699  | 9 443 973  | 9 505 456  | 9 601 303  |
| Government deficit (-) / surplus (+) | (million euro) | -570 801   | -389 252   | -351 687   | -292 772   |
|                                      | (% of GDP)     | -6.2       | -4.1       | -3.7       | -3.0       |
| Government expenditure               | (% of GDP)     | 51.0       | 49.4       | 49.9       | 49.8       |
| Government revenue                   | (% of GDP)     | 44.8       | 45.3       | 46.2       | 46.8       |
| Government debt                      | (million euro) | 7 854 072  | 8 251 429  | 8 619 824  | 8 890 375  |
|                                      | (% of GDP)     | 85.5       | 87.4       | 90.7       | 92.6       |
| <b>EU28</b>                          |                |            |            |            |            |
| GDP market prices (mp)               | (million euro) | 12 337 092 | 12 711 210 | 12 959 934 | 13 067 744 |
| Government deficit (-) / surplus (+) | (million euro) | -803 120   | -560 953   | -511 574   | -437 323   |
|                                      | (% of GDP)     | -6.5       | -4.4       | -3.9       | -3.3       |
| Government expenditure               | (% of GDP)     | 50.6       | 49.0       | 49.4       | 49.1       |
| Government revenue                   | (% of GDP)     | 44.1       | 44.6       | 45.4       | 45.7       |
| Government debt                      | (million euro) | 9 861 266  | 10 476 815 | 11 046 910 | 11 386 019 |
|                                      | (% of GDP)     | 79.9       | 82.4       | 85.2       | 87.1       |

In 2013 **Luxembourg** (+0.1%) registered a government surplus, **Germany** was close to balance, and the lowest government deficits in percentage of GDP were recorded in **Estonia** (-0.2%), **Denmark** (-0.8%), **Latvia** (-1.0%) and **Sweden** (-1.1%). Ten Member States had deficits higher than 3% of GDP: **Slovenia** (-14.7%), **Greece** (-12.7%), **Ireland** (-7.2%), **Spain** (-7.1%), the **United Kingdom** (-5.8%), **Cyprus** (-5.4%), **Croatia** and **Portugal** (both -4.9%), **France** and **Poland** (both -4.3%).

At the end of 2013, the lowest ratios of government debt to GDP were recorded in **Estonia** (10.0%), **Bulgaria** (18.9%), **Luxembourg** (23.1%), **Latvia** (38.1%), **Romania** (38.4%), **Lithuania** (39.4%) and **Sweden** (40.6%). Sixteen Member States had government debt ratios higher than 60% of GDP, with the highest registered in **Greece** (175.1%), **Italy** (132.6%), **Portugal** (129.0%), **Ireland** (123.7%), **Cyprus** (111.7%) and **Belgium** (101.5%).

In 2013, government expenditure<sup>4</sup> in the **euro area** was equivalent to 49.8% of GDP and government revenue<sup>4</sup> to 46.8%. The figures for the **EU28** were 49.1% and 45.7% respectively. In both zones, the government expenditure ratio decreased and the government revenue ratio increased between 2012 and 2013.

## Reservations on reported data<sup>5</sup>

**Austria:** Eurostat is withdrawing the specific reservation on the quality of the EDP data reported by Austria, which had been expressed in Eurostat's News Release of 21 October 2013 due to uncertainties on the statistical impact of the conclusions of the Federal Audit Office's report on the Land Salzburg, published on 9 October 2013. Following investigations by the Austrian statistical authorities, the necessary revisions have been introduced in the reported deficit and debt data.

**The Netherlands:** Eurostat is expressing a reservation on the quality of the government deficit data reported by the Netherlands, due to uncertainties on the statistical impact of the government interventions relating to the nationalisation and restructuring of SNS Reaal in 2013. The size of the impact is being clarified with the Dutch statistical authorities. Based on currently available information, Eurostat expects that the resulting increase in the government deficit for 2013 would not exceed 0.3% of GDP.

## Amendment by Eurostat to reported data<sup>6</sup>

Eurostat has made no amendments to the data reported by Member States.

## Other issues

### *i. Intergovernmental lending*

For the purpose of proper consolidation of general government debt in European aggregates and to provide users with information, Eurostat is collecting and publishing data on government loans to other EU governments, including those made through the European Financial Stability Facility (EFSF). For 2013 the intergovernmental lending figures relate mainly to lending to Greece, Ireland and Portugal.

### *ii. Supplementary tables for the financial crisis*

Annex 2 contains supplementary tables for the financial crisis for the EU and the euro area. Eurostat publishes supplementary tables by Member State on its website:

[http://epp.eurostat.ec.europa.eu/portal/page/portal/government\\_finance\\_statistics/excessive\\_deficit/supplementary\\_tables\\_financial\\_turmoil](http://epp.eurostat.ec.europa.eu/portal/page/portal/government_finance_statistics/excessive_deficit/supplementary_tables_financial_turmoil).

These tables contain data on the "net revenue/cost for general government (impact on ESA95 government deficit)" and "outstanding amounts of assets, actual liabilities and contingent liabilities of government" in relation to government interventions in the context of the financial crisis for the years 2010 to 2013. See also the Eurostat decision on the statistical recording of public interventions to support financial institutions and financial markets during the financial crisis (Eurostat News Release 103/2009 of 15 July 2009) and subsequent guidance.

### *iii. Background note on government interventions in the context of the financial crisis*

Eurostat also publishes a background note providing more information on the content of the supplementary tables and data findings at:

[http://epp.eurostat.ec.europa.eu/portal/page/portal/government\\_finance\\_statistics/documents/Background\\_note\\_fin\\_crisis\\_Apr\\_2014\\_final.pdf](http://epp.eurostat.ec.europa.eu/portal/page/portal/government_finance_statistics/documents/Background_note_fin_crisis_Apr_2014_final.pdf)

Table 3 of the background note shows government deficit/surplus data for 2012 and 2013 excluding the impacts of government interventions to support financial institutions. It should be noted that this adjusted measure of government deficit/surplus is only intended to be an improvement in the presentation of data for users.

### *iv. Stock of liabilities of trade credits and advances*

Eurostat publishes on its website, as complementary information on government liabilities, data on trade credits and advances, as reported by Member States for the years 2010 to 2013:

[http://epp.eurostat.ec.europa.eu/portal/page/portal/government\\_finance\\_statistics/documents/Note\\_on\\_AF.71L-Apr\\_2014.pdf](http://epp.eurostat.ec.europa.eu/portal/page/portal/government_finance_statistics/documents/Note_on_AF.71L-Apr_2014.pdf).

It should be noted that, according to Council Regulation (EC) 479/2009, as amended, the liabilities in trade credits and advances of government units are not part of "Maastricht debt".

### *v. Quarterly data on government debt*

Annex 3 contains data on the structure of the outstanding debt by component of the euro area and EU28 for the fourth quarter of 2013, and the changes in the government debt ratio as compared to the third quarter of 2013.

## Background

In this News Release, **Eurostat, the statistical office of the European Union**, is providing<sup>7</sup> government deficit and debt data based on figures reported in the **first 2014 notification** by EU Member States for the years 2010-2013, for the application of the excessive deficit procedure (EDP). This notification is based on the ESA95 system of national accounts. This News Release also includes data on government expenditure and revenue. Annex 1 shows the main revisions since the October 2013 News Release.

Eurostat will also be releasing information on the underlying government sector accounts, as well as on the contribution of deficit/surplus and other relevant factors to the variation in the debt level (stock-flow adjustment), on the government finance statistics section on its website:

[http://epp.eurostat.ec.europa.eu/portal/page/portal/government\\_finance\\_statistics/introduction](http://epp.eurostat.ec.europa.eu/portal/page/portal/government_finance_statistics/introduction)

1. According to the Protocol on the excessive deficit procedure annexed to the EC Treaty, government deficit (surplus) means the net borrowing (net lending) of the whole general government sector (central government, state government, local government and social security funds). It is calculated according to national accounts concepts (European System of Accounts, ESA95). Government debt is the consolidated gross debt of the whole general government sector outstanding at the end of the year (at nominal value).
  - Table of euro area and EU28 aggregates: the data are in euro. For those countries not belonging to the euro area, the rate of conversion into euro is as follows:
    - for deficit / surplus and GDP data, the annual average exchange rate;
    - for the stock of government debt, the end of year exchange rate.
  - Table of national data: these are in national currencies. For Estonia and Latvia, data for the years prior to the adoption of the euro have been converted into euro according to the irrevocable conversion rate.
2. Euro area (EA18): Belgium, Germany, Estonia, Ireland, Greece, Spain, France, Italy, Cyprus, Latvia, Luxembourg, Malta, Netherlands, Austria, Portugal, Slovenia, Slovakia and Finland. In the attached table, the euro area is defined as including Estonia and Latvia for the full period, although Estonia joined the euro area on 1 January 2011 and Latvia on 1 January 2014.

Up to 30 June 2013, the European Union (EU27) included 27 Member States. From 1 July 2013 the European Union (EU28) also includes Croatia. In the attached table, all periods refer to the EU28.
3. In the previous provision of data for the excessive deficit procedure, the 2012 government deficit for the EU28 was 3.9% of GDP and the government debt was 85.1% of GDP. See News Release 152/2013 of 21 October 2013.
4. Government expenditure and revenue are reported to Eurostat under the ESA95 transmission programme. They are the sum of non-financial transactions by general government, and include both current and capital transactions. For definitions, see Council Regulation 2223/96, as amended. It should be noted that the government balance (i.e. the difference between total government revenue and expenditure) is not exactly the same under ESA95 as that for the purpose of the excessive deficit procedure (see Regulation (EC) 2558/2001 on the reclassification of settlements under swaps agreements and forward rate agreements).
5. The term "reservations" is defined in article 15 (1) of Council Regulation (EC) 479/2009, as amended. The Commission (Eurostat) expresses reservations when it has doubts on the quality of the reported data.
6. According to Article 15 (2) of Council Regulation (EC) 479/2009, as amended, the Commission (Eurostat) may amend actual data reported by Member States and provide the amended data and a justification of the amendment where there is evidence that actual data reported by Member States do not comply with the quality requirements (compliance with accounting rules, completeness, reliability, timeliness and consistency of statistical data).
7. According to Article 14 (1) of Council Regulation (EC) 479/2009, as amended, Eurostat provides the actual government deficit and debt data for the application of the Protocol on the excessive deficit procedure, within three weeks after the reporting deadlines. This provision of data shall be effected through publication.

*For further information on the methodology of statistics reported under the excessive deficit procedure, please see Council Regulation (EC) 479/2009, as amended by Council Regulation (EC) 679/2010 (consolidated version available at: <http://eur-lex.europa.eu/LexUriServ/LexUriServ.do?uri=CONSLEG:2009R0479:20100819:EN:PDF>), Council Regulation 2223/96, as amended (consolidated version available at: <http://eur-lex.europa.eu/legal-content/EN/TXT/PDF/?uri=CELEX:01996R2223-20100831&rid=2>) and the Eurostat publication "ESA95 manual on government deficit and debt", sixth edition, 2013: [http://epp.eurostat.ec.europa.eu/portal/page/portal/product\\_details/publication?p\\_product\\_code=KS-GQ-13-006](http://epp.eurostat.ec.europa.eu/portal/page/portal/product_details/publication?p_product_code=KS-GQ-13-006)*

Issued by:

**Eurostat Press Office**

**Tim ALLEN**

**Tel: +352-4301-33 444**

**[eurostat-pressoffice@ec.europa.eu](mailto:eurostat-pressoffice@ec.europa.eu)**

Eurostat news releases on the internet: <http://ec.europa.eu/eurostat>  
Selected Principal European Economic Indicators: <http://ec.europa.eu/eurostat/euroindicators>

## GDP, government deficit/surplus and debt in the EU (in national currencies)

|                                                                           |                | 2010      | 2011      | 2012      | 2013      |
|---------------------------------------------------------------------------|----------------|-----------|-----------|-----------|-----------|
| <b>Belgium</b>                                                            |                |           |           |           |           |
| GDP mp                                                                    | (million euro) | 355 740   | 369 259   | 375 881   | 381 401   |
| Government deficit (-) / surplus (+)                                      | (million euro) | -13 627   | -14 161   | -15 235   | -9 924    |
|                                                                           | (% of GDP)     | -3.8      | -3.8      | -4.1      | -2.6      |
| Government expenditure                                                    | (% of GDP)     | 52.6      | 53.6      | 55.1      | 54.7      |
| Government revenue                                                        | (% of GDP)     | 48.7      | 49.6      | 51.0      | 52.0      |
| Government debt                                                           | (million euro) | 343 725   | 366 249   | 380 157   | 387 159   |
|                                                                           | (% of GDP)     | 96.6      | 99.2      | 101.1     | 101.5     |
| memo: intergovernmental lending<br>in the context of the financial crisis | (million euro) | 830       | 2 586     | 7 198     | 8 600     |
|                                                                           | (% of GDP)     | 0.2       | 0.7       | 1.9       | 2.3       |
| <b>Bulgaria</b>                                                           |                |           |           |           |           |
| GDP mp                                                                    | (million BGN)  | 70 511    | 75 308    | 78 089    | 78 115    |
| Government deficit (-) / surplus (+)                                      | (million BGN)  | -2 198    | -1 492    | -604      | -1 178    |
|                                                                           | (% of GDP)     | -3.1      | -2.0      | -0.8      | -1.5      |
| Government expenditure                                                    | (% of GDP)     | 37.4      | 35.6      | 35.8      | 38.7      |
| Government revenue                                                        | (% of GDP)     | 34.3      | 33.6      | 35.0      | 37.2      |
| Government debt                                                           | (million BGN)  | 11 453    | 12 291    | 14 388    | 14 733    |
|                                                                           | (% of GDP)     | 16.2      | 16.3      | 18.4      | 18.9      |
| memo: intergovernmental lending<br>in the context of the financial crisis | (million BGN)  | 0         | 0         | 0         | 0         |
|                                                                           | (% of GDP)     | 0.0       | 0.0       | 0.0       | 0.0       |
| <b>Czech Republic</b>                                                     |                |           |           |           |           |
| GDP mp                                                                    | (million CZK)  | 3 790 880 | 3 823 401 | 3 845 926 | 3 883 780 |
| Government deficit (-) / surplus (+)                                      | (million CZK)  | -179 130  | -122 337  | -162 113  | -56 436   |
|                                                                           | (% of GDP)     | -4.7      | -3.2      | -4.2      | -1.5      |
| Government expenditure                                                    | (% of GDP)     | 43.7      | 43.2      | 44.5      | 42.3      |
| Government revenue                                                        | (% of GDP)     | 39.1      | 40.0      | 40.3      | 40.9      |
| Government debt                                                           | (million CZK)  | 1 454 385 | 1 583 262 | 1 775 065 | 1 788 209 |
|                                                                           | (% of GDP)     | 38.4      | 41.4      | 46.2      | 46.0      |
| memo: intergovernmental lending<br>in the context of the financial crisis | (million CZK)  | 0         | 0         | 0         | 0         |
|                                                                           | (% of GDP)     | 0.0       | 0.0       | 0.0       | 0.0       |
| <b>Denmark</b>                                                            |                |           |           |           |           |
| GDP mp                                                                    | (million DKK)  | 1 760 051 | 1 791 773 | 1 825 582 | 1 858 764 |
| Government deficit (-) / surplus (+)                                      | (million DKK)  | -44 458   | -33 672   | -69 007   | -15 118   |
|                                                                           | (% of GDP)     | -2.5      | -1.9      | -3.8      | -0.8      |
| Government expenditure                                                    | (% of GDP)     | 57.7      | 57.7      | 59.4      | 57.1      |
| Government revenue                                                        | (% of GDP)     | 55.0      | 55.7      | 55.5      | 56.2      |
| Government debt                                                           | (million DKK)  | 752 829   | 831 147   | 828 056   | 826 861   |
|                                                                           | (% of GDP)     | 42.8      | 46.4      | 45.4      | 44.5      |
| memo: intergovernmental lending<br>in the context of the financial crisis | (million DKK)  | 0         | 0         | 1 500     | 2 984     |
|                                                                           | (% of GDP)     | 0.0       | 0.0       | 0.1       | 0.2       |
| <b>Germany</b>                                                            |                |           |           |           |           |
| GDP mp                                                                    | (million euro) | 2 495 000 | 2 609 900 | 2 666 400 | 2 737 600 |
| Government deficit (-) / surplus (+)                                      | (million euro) | -104 150  | -22 020   | 2 380     | 190       |
|                                                                           | (% of GDP)     | -4.2      | -0.8      | 0.1       | 0.0       |
| Government expenditure                                                    | (% of GDP)     | 47.9      | 45.2      | 44.7      | 44.7      |
| Government revenue                                                        | (% of GDP)     | 43.7      | 44.3      | 44.8      | 44.7      |
| Government debt                                                           | (million euro) | 2 059 174 | 2 087 747 | 2 160 951 | 2 147 028 |
|                                                                           | (% of GDP)     | 82.5      | 80.0      | 81.0      | 78.4      |
| memo: intergovernmental lending<br>in the context of the financial crisis | (million euro) | 6 049     | 19 994    | 56 091    | 67 025    |
|                                                                           | (% of GDP)     | 0.2       | 0.8       | 2.1       | 2.4       |

## GDP, government deficit/surplus and debt in the EU (in national currencies)

|                                                                           |                | 2010      | 2011      | 2012      | 2013      |
|---------------------------------------------------------------------------|----------------|-----------|-----------|-----------|-----------|
| <b>Estonia</b>                                                            |                |           |           |           |           |
| GDP mp                                                                    | (million euro) | 14 371    | 16 216    | 17 415    | 18 435    |
| Government deficit (-) / surplus (+)                                      | (million euro) | 25        | 179       | -41       | -34       |
|                                                                           | (% of GDP)     | 0.2       | 1.1       | -0.2      | -0.2      |
| Government expenditure                                                    | (% of GDP)     | 40.5      | 37.6      | 39.5      | 38.3      |
| Government revenue                                                        | (% of GDP)     | 40.7      | 38.7      | 39.2      | 38.1      |
| Government debt                                                           | (million euro) | 961       | 982       | 1 712     | 1 845     |
|                                                                           | (% of GDP)     | 6.7       | 6.1       | 9.8       | 10.0      |
| memo: intergovernmental lending<br>in the context of the financial crisis | (million euro) | 0         | 14        | 355       | 458       |
|                                                                           | (% of GDP)     | 0.0       | 0.1       | 2.0       | 2.5       |
| <b>Ireland</b>                                                            |                |           |           |           |           |
| GDP mp                                                                    | (million euro) | 158 097   | 162 600   | 163 938   | 164 050   |
| Government deficit (-) / surplus (+)                                      | (million euro) | -48 386   | -21 350   | -13 443   | -11 778   |
|                                                                           | (% of GDP)     | -30.6     | -13.1     | -8.2      | -7.2      |
| Government expenditure                                                    | (% of GDP)     | 65.5      | 47.1      | 42.6      | 42.9      |
| Government revenue                                                        | (% of GDP)     | 34.9      | 34.0      | 34.5      | 35.9      |
| Government debt                                                           | (million euro) | 144 163   | 169 222   | 192 467   | 202 920   |
|                                                                           | (% of GDP)     | 91.2      | 104.1     | 117.4     | 123.7     |
| memo: intergovernmental lending<br>in the context of the financial crisis | (million euro) | 347       | 347       | 347       | 347       |
|                                                                           | (% of GDP)     | 0.2       | 0.2       | 0.2       | 0.2       |
| <b>Greece</b>                                                             |                |           |           |           |           |
| GDP mp                                                                    | (million euro) | 222 151   | 208 532   | 193 347   | 182 054   |
| Government deficit (-) / surplus (+)                                      | (million euro) | -24 113   | -19 964   | -17 205   | -23 109   |
|                                                                           | (% of GDP)     | -10.9     | -9.6      | -8.9      | -12.7     |
| Government expenditure                                                    | (% of GDP)     | 51.4      | 51.9      | 53.4      | 58.5      |
| Government revenue                                                        | (% of GDP)     | 40.4      | 42.2      | 44.4      | 45.8      |
| Government debt                                                           | (million euro) | 329 514   | 355 141   | 303 936   | 318 703   |
|                                                                           | (% of GDP)     | 148.3     | 170.3     | 157.2     | 175.1     |
| memo: intergovernmental lending<br>in the context of the financial crisis | (million euro) | 0         | 0         | 0         | 0         |
|                                                                           | (% of GDP)     | 0.0       | 0.0       | 0.0       | 0.0       |
| <b>Spain</b>                                                              |                |           |           |           |           |
| GDP mp                                                                    | (million euro) | 1 045 620 | 1 046 327 | 1 029 279 | 1 022 988 |
| Government deficit (-) / surplus (+)                                      | (million euro) | -100 508  | -100 072  | -109 460  | -72 577   |
|                                                                           | (% of GDP)     | -9.6      | -9.6      | -10.6     | -7.1      |
| Government expenditure                                                    | (% of GDP)     | 46.3      | 45.7      | 47.8      | 44.8      |
| Government revenue                                                        | (% of GDP)     | 36.7      | 36.2      | 37.2      | 37.8      |
| Government debt                                                           | (million euro) | 644 692   | 737 406   | 884 731   | 960 676   |
|                                                                           | (% of GDP)     | 61.7      | 70.5      | 86.0      | 93.9      |
| memo: intergovernmental lending<br>in the context of the financial crisis | (million euro) | 2 598     | 8 717     | 24 542    | 29 342    |
|                                                                           | (% of GDP)     | 0.2       | 0.8       | 2.4       | 2.9       |
| <b>France</b>                                                             |                |           |           |           |           |
| GDP mp                                                                    | (million euro) | 1 936 720 | 2 001 398 | 2 032 296 | 2 059 852 |
| Government deficit (-) / surplus (+)                                      | (million euro) | -135 744  | -103 093  | -98 747   | -87 566   |
|                                                                           | (% of GDP)     | -7.0      | -5.2      | -4.9      | -4.3      |
| Government expenditure                                                    | (% of GDP)     | 56.6      | 55.9      | 56.7      | 57.1      |
| Government revenue                                                        | (% of GDP)     | 49.5      | 50.7      | 51.8      | 52.8      |
| Government debt                                                           | (million euro) | 1 601 966 | 1 724 917 | 1 841 027 | 1 925 292 |
|                                                                           | (% of GDP)     | 82.7      | 86.2      | 90.6      | 93.5      |
| memo: intergovernmental lending<br>in the context of the financial crisis | (million euro) | 4 448     | 14 989    | 42 090    | 50 310    |
|                                                                           | (% of GDP)     | 0.2       | 0.7       | 2.1       | 2.4       |

## GDP, government deficit/surplus and debt in the EU (in national currencies)

|                                                                           |                | 2010      | 2011      | 2012      | 2013      |
|---------------------------------------------------------------------------|----------------|-----------|-----------|-----------|-----------|
| <b>Croatia</b>                                                            |                |           |           |           |           |
| GDP mp                                                                    | (million HRK)  | 323 807   | 328 737   | 328 562   | 328 252   |
| Government deficit (-) / surplus (+)                                      | (million HRK)  | -20 564   | -25 759   | -16 288   | -16 172   |
|                                                                           | (% of GDP)     | -6.4      | -7.8      | -5.0      | -4.9      |
| Government expenditure                                                    | (% of GDP)     | 46.9      | 48.1      | 45.7      | 45.9      |
| Government revenue                                                        | (% of GDP)     | 40.5      | 40.3      | 40.8      | 41.0      |
| Government debt                                                           | (million HRK)  | 145 721   | 170 859   | 183 676   | 220 196   |
|                                                                           | (% of GDP)     | 45.0      | 52.0      | 55.9      | 67.1      |
| memo: intergovernmental lending<br>in the context of the financial crisis | (million HRK)  | 0         | 0         | 0         | 0         |
|                                                                           | (% of GDP)     | 0.0       | 0.0       | 0.0       | 0.0       |
| <b>Italy</b>                                                              |                |           |           |           |           |
| GDP mp                                                                    | (million euro) | 1 551 886 | 1 579 946 | 1 566 912 | 1 560 024 |
| Government deficit (-) / surplus (+)                                      | (million euro) | -69 919   | -59 112   | -47 356   | -47 345   |
|                                                                           | (% of GDP)     | -4.5      | -3.7      | -3.0      | -3.0      |
| Government expenditure                                                    | (% of GDP)     | 50.5      | 49.7      | 50.6      | 50.6      |
| Government revenue                                                        | (% of GDP)     | 46.1      | 46.1      | 47.7      | 47.7      |
| Government debt                                                           | (million euro) | 1 851 256 | 1 907 564 | 1 989 473 | 2 069 216 |
|                                                                           | (% of GDP)     | 119.3     | 120.7     | 127.0     | 132.6     |
| memo: intergovernmental lending<br>in the context of the financial crisis | (million euro) | 3 909     | 13 118    | 36 932    | 44 156    |
|                                                                           | (% of GDP)     | 0.3       | 0.8       | 2.4       | 2.8       |
| <b>Cyprus</b>                                                             |                |           |           |           |           |
| GDP mp                                                                    | (million euro) | 17 406    | 17 878    | 17 720    | 16 504    |
| Government deficit (-) / surplus (+)                                      | (million euro) | -920      | -1 132    | -1 135    | -897      |
|                                                                           | (% of GDP)     | -5.3      | -6.3      | -6.4      | -5.4      |
| Government expenditure                                                    | (% of GDP)     | 46.2      | 46.3      | 45.8      | 45.8      |
| Government revenue                                                        | (% of GDP)     | 40.9      | 39.9      | 39.4      | 40.3      |
| Government debt                                                           | (million euro) | 10 675    | 12 778    | 15 350    | 18 442    |
|                                                                           | (% of GDP)     | 61.3      | 71.5      | 86.6      | 111.7     |
| memo: intergovernmental lending<br>in the context of the financial crisis | (million euro) | 43        | 144       | 405       | 393       |
|                                                                           | (% of GDP)     | 0.2       | 0.8       | 2.3       | 2.4       |
| <b>Latvia</b>                                                             |                |           |           |           |           |
| GDP mp                                                                    | (million euro) | 18 190    | 20 312    | 22 083    | 23 315    |
| Government deficit (-) / surplus (+)                                      | (million euro) | -1 485    | -716      | -294      | -224      |
|                                                                           | (% of GDP)     | -8.2      | -3.5      | -1.3      | -1.0      |
| Government expenditure                                                    | (% of GDP)     | 43.4      | 38.4      | 36.5      | 36.1      |
| Government revenue                                                        | (% of GDP)     | 35.3      | 34.9      | 35.1      | 35.1      |
| Government debt                                                           | (million euro) | 8 096     | 8 527     | 9 013     | 8 873     |
|                                                                           | (% of GDP)     | 44.5      | 42.0      | 40.8      | 38.1      |
| memo: intergovernmental lending<br>in the context of the financial crisis | (million euro) | 0         | 0         | 0         | 0         |
|                                                                           | (% of GDP)     | 0.0       | 0.0       | 0.0       | 0.0       |
| <b>Lithuania</b>                                                          |                |           |           |           |           |
| GDP mp                                                                    | (million LTL)  | 95 676    | 106 893   | 113 735   | 119 469   |
| Government deficit (-) / surplus (+)                                      | (million LTL)  | -6 869    | -5 849    | -3 694    | -2 570    |
|                                                                           | (% of GDP)     | -7.2      | -5.5      | -3.2      | -2.2      |
| Government expenditure                                                    | (% of GDP)     | 42.3      | 38.7      | 36.1      | 34.5      |
| Government revenue                                                        | (% of GDP)     | 35.0      | 33.2      | 32.7      | 32.3      |
| Government debt                                                           | (million LTL)  | 36 127    | 40 962    | 46 037    | 47 112    |
|                                                                           | (% of GDP)     | 37.8      | 38.3      | 40.5      | 39.4      |
| memo: intergovernmental lending<br>in the context of the financial crisis | (million LTL)  | 0         | 0         | 0         | 0         |
|                                                                           | (% of GDP)     | 0.0       | 0.0       | 0.0       | 0.0       |

## GDP, government deficit/surplus and debt in the EU (in national currencies)

|                                                                           |                | 2010       | 2011       | 2012       | 2013       |
|---------------------------------------------------------------------------|----------------|------------|------------|------------|------------|
| <b>Luxembourg</b>                                                         |                |            |            |            |            |
| GDP mp                                                                    | (million euro) | 39 303     | 41 730     | 42 918     | 45 478     |
| Government deficit (-) / surplus (+)                                      | (million euro) | -301       | 72         | 20         | 26         |
|                                                                           | (% of GDP)     | -0.8       | 0.2        | 0.0        | 0.1        |
| Government expenditure                                                    | (% of GDP)     | 43.5       | 42.6       | 43.9       | 43.5       |
| Government revenue                                                        | (% of GDP)     | 42.8       | 42.7       | 44.0       | 43.6       |
| Government debt                                                           | (million euro) | 7 673      | 7 805      | 9 321      | 10 512     |
|                                                                           | (% of GDP)     | 19.5       | 18.7       | 21.7       | 23.1       |
| memo: intergovernmental lending<br>in the context of the financial crisis | (million euro) | 55         | 183        | 516        | 617        |
|                                                                           | (% of GDP)     | 0.1        | 0.4        | 1.2        | 1.4        |
| <b>Hungary</b>                                                            |                |            |            |            |            |
| GDP mp                                                                    | (million HUF)  | 26 513 032 | 27 635 435 | 28 048 068 | 29 114 426 |
| Government deficit (-) / surplus (+)                                      | (million HUF)  | -1 143 919 | 1 194 947  | -578 733   | -633 585   |
|                                                                           | (% of GDP)     | -4.3       | 4.3        | -2.1       | -2.2       |
| Government expenditure                                                    | (% of GDP)     | 50.0       | 50.0       | 48.7       | 50.0       |
| Government revenue                                                        | (% of GDP)     | 45.6       | 54.3       | 46.6       | 47.6       |
| Government debt                                                           | (million HUF)  | 21 782 694 | 22 698 144 | 22 392 809 | 23 067 975 |
|                                                                           | (% of GDP)     | 82.2       | 82.1       | 79.8       | 79.2       |
| memo: intergovernmental lending<br>in the context of the financial crisis | (million HUF)  | 0          | 0          | 0          | 0          |
|                                                                           | (% of GDP)     | 0.0        | 0.0        | 0.0        | 0.0        |
| <b>Malta</b>                                                              |                |            |            |            |            |
| GDP mp                                                                    | (million euro) | 6 449      | 6 694      | 6 880      | 7 186      |
| Government deficit (-) / surplus (+)                                      | (million euro) | -224       | -184       | -225       | -203       |
|                                                                           | (% of GDP)     | -3.5       | -2.7       | -3.3       | -2.8       |
| Government expenditure                                                    | (% of GDP)     | 41.2       | 41.3       | 43.1       | 43.9       |
| Government revenue                                                        | (% of GDP)     | 37.7       | 38.6       | 39.9       | 41.1       |
| Government debt                                                           | (million euro) | 4 258      | 4 607      | 4 871      | 5 243      |
|                                                                           | (% of GDP)     | 66.0       | 68.8       | 70.8       | 73.0       |
| memo: intergovernmental lending<br>in the context of the financial crisis | (million euro) | 20         | 66         | 187        | 223        |
|                                                                           | (% of GDP)     | 0.3        | 1.0        | 2.7        | 3.1        |
| <b>Netherlands</b>                                                        |                |            |            |            |            |
| GDP mp                                                                    | (million euro) | 586 789    | 599 047    | 599 338    | 602 658    |
| Government deficit (-) / surplus (+)                                      | (million euro) | -30 109    | -26 010    | -24 323    | -15 163    |
|                                                                           | (% of GDP)     | -5.1       | -4.3       | -4.1       | -2.5       |
| Government expenditure                                                    | (% of GDP)     | 51.3       | 49.9       | 50.4       | 49.8       |
| Government revenue                                                        | (% of GDP)     | 46.3       | 45.6       | 46.4       | 47.3       |
| Government debt                                                           | (million euro) | 372 028    | 393 671    | 427 106    | 443 008    |
|                                                                           | (% of GDP)     | 63.4       | 65.7       | 71.3       | 73.5       |
| memo: intergovernmental lending<br>in the context of the financial crisis | (million euro) | 1 247      | 4 187      | 11 791     | 14 096     |
|                                                                           | (% of GDP)     | 0.2        | 0.7        | 2.0        | 2.3        |
| <b>Austria</b>                                                            |                |            |            |            |            |
| GDP mp                                                                    | (million euro) | 285 165    | 299 240    | 307 004    | 313 197    |
| Government deficit (-) / surplus (+)                                      | (million euro) | -12 866    | -7 347     | -7 866     | -4 776     |
|                                                                           | (% of GDP)     | -4.5       | -2.5       | -2.6       | -1.5       |
| Government expenditure                                                    | (% of GDP)     | 52.8       | 50.8       | 51.6       | 51.2       |
| Government revenue                                                        | (% of GDP)     | 48.3       | 48.3       | 49.1       | 49.7       |
| Government debt                                                           | (million euro) | 206 610    | 218 631    | 228 422    | 233 303    |
|                                                                           | (% of GDP)     | 72.5       | 73.1       | 74.4       | 74.5       |
| memo: intergovernmental lending<br>in the context of the financial crisis | (million euro) | 607        | 2 038      | 5 741      | 6 863      |
|                                                                           | (% of GDP)     | 0.2        | 0.7        | 1.9        | 2.2        |

## GDP, government deficit/surplus and debt in the EU (in national currencies)

|                                                                           |                | 2010      | 2011      | 2012      | 2013      |
|---------------------------------------------------------------------------|----------------|-----------|-----------|-----------|-----------|
| <b>Poland</b>                                                             |                |           |           |           |           |
| GDP mp                                                                    | (million PLN)  | 1 416 585 | 1 528 127 | 1 596 378 | 1 635 746 |
| Government deficit (-) / surplus (+)                                      | (million PLN)  | -110 870  | -77 214   | -61 681   | -70 651   |
|                                                                           | (% of GDP)     | -7.8      | -5.1      | -3.9      | -4.3      |
| Government expenditure                                                    | (% of GDP)     | 45.4      | 43.4      | 42.2      | 41.9      |
| Government revenue                                                        | (% of GDP)     | 37.5      | 38.4      | 38.3      | 37.5      |
| Government debt                                                           | (million PLN)  | 777 383   | 859 207   | 886 873   | 932 509   |
|                                                                           | (% of GDP)     | 54.9      | 56.2      | 55.6      | 57.0      |
| memo: intergovernmental lending<br>in the context of the financial crisis | (million PLN)  | 0         | 0         | 0         | 0         |
|                                                                           | (% of GDP)     | 0.0       | 0.0       | 0.0       | 0.0       |
| <b>Portugal</b>                                                           |                |           |           |           |           |
| GDP mp                                                                    | (million euro) | 172 859   | 171 126   | 165 107   | 165 666   |
| Government deficit (-) / surplus (+)                                      | (million euro) | -16 982   | -7 398    | -10 641   | -8 122    |
|                                                                           | (% of GDP)     | -9.8      | -4.3      | -6.4      | -4.9      |
| Government expenditure                                                    | (% of GDP)     | 51.5      | 49.3      | 47.4      | 48.7      |
| Government revenue                                                        | (% of GDP)     | 41.6      | 45.0      | 40.9      | 43.7      |
| Government debt                                                           | (million euro) | 162 473   | 185 241   | 204 860   | 213 631   |
|                                                                           | (% of GDP)     | 94.0      | 108.2     | 124.1     | 129.0     |
| memo: intergovernmental lending<br>in the context of the financial crisis | (million euro) | 548       | 1 212     | 1 119     | 1 119     |
|                                                                           | (% of GDP)     | 0.3       | 0.7       | 0.7       | 0.7       |
| <b>Romania</b>                                                            |                |           |           |           |           |
| GDP mp                                                                    | (million RON)  | 523 693   | 557 348   | 586 750   | 628 581   |
| Government deficit (-) / surplus (+)                                      | (million RON)  | -35 552   | -30 901   | -17 548   | -14 308   |
|                                                                           | (% of GDP)     | -6.8      | -5.5      | -3.0      | -2.3      |
| Government expenditure                                                    | (% of GDP)     | 40.1      | 39.4      | 36.7      | 35.0      |
| Government revenue                                                        | (% of GDP)     | 33.3      | 33.9      | 33.7      | 32.7      |
| Government debt                                                           | (million RON)  | 159 617   | 193 201   | 222 796   | 241 445   |
|                                                                           | (% of GDP)     | 30.5      | 34.7      | 38.0      | 38.4      |
| memo: intergovernmental lending<br>in the context of the financial crisis | (million RON)  | 0         | 0         | 0         | 0         |
|                                                                           | (% of GDP)     | 0.0       | 0.0       | 0.0       | 0.0       |
| <b>Slovenia</b>                                                           |                |           |           |           |           |
| GDP mp                                                                    | (million euro) | 35 485    | 36 150    | 35 319    | 35 275    |
| Government deficit (-) / surplus (+)                                      | (million euro) | -2 082    | -2 306    | -1 414    | -5 188    |
|                                                                           | (% of GDP)     | -5.9      | -6.4      | -4.0      | -14.7     |
| Government expenditure                                                    | (% of GDP)     | 49.5      | 49.9      | 48.4      | 59.4      |
| Government revenue                                                        | (% of GDP)     | 43.6      | 43.5      | 44.4      | 44.7      |
| Government debt                                                           | (million euro) | 13 742    | 17 016    | 19 204    | 25 307    |
|                                                                           | (% of GDP)     | 38.7      | 47.1      | 54.4      | 71.7      |
| memo: intergovernmental lending<br>in the context of the financial crisis | (million euro) | 103       | 325       | 972       | 1 162     |
|                                                                           | (% of GDP)     | 0.3       | 0.9       | 2.8       | 3.3       |
| <b>Slovakia</b>                                                           |                |           |           |           |           |
| GDP mp                                                                    | (million euro) | 65 897    | 68 974    | 71 096    | 72 134    |
| Government deficit (-) / surplus (+)                                      | (million euro) | -4 969    | -3 285    | -3 188    | -1 995    |
|                                                                           | (% of GDP)     | -7.5      | -4.8      | -4.5      | -2.8      |
| Government expenditure                                                    | (% of GDP)     | 39.8      | 38.9      | 38.2      | 38.7      |
| Government revenue                                                        | (% of GDP)     | 32.3      | 34.1      | 33.7      | 35.9      |
| Government debt                                                           | (million euro) | 26 998    | 30 106    | 37 439    | 39 975    |
|                                                                           | (% of GDP)     | 41.0      | 43.6      | 52.7      | 55.4      |
| memo: intergovernmental lending<br>in the context of the financial crisis | (million euro) | 0         | 173       | 1 494     | 1 895     |
|                                                                           | (% of GDP)     | 0.0       | 0.3       | 2.1       | 2.6       |



## GDP, government deficit/surplus and debt in the EU (in national currencies)

|                                                                                   |                      | 2010             | 2011             | 2012             | 2013             |
|-----------------------------------------------------------------------------------|----------------------|------------------|------------------|------------------|------------------|
| <b>Finland</b>                                                                    |                      |                  |                  |                  |                  |
| GDP mp                                                                            | (million euro)       | 178 724          | 188 744          | 192 350          | 193 443          |
| Government deficit (-) / surplus (+)                                              | (million euro)       | -4 455           | -1 356           | -3 512           | -4 086           |
|                                                                                   | (% of GDP)           | -2.5             | -0.7             | -1.8             | -2.1             |
| Government expenditure                                                            | (% of GDP)           | 55.8             | 55.1             | 56.7             | 58.5             |
| Government revenue                                                                | (% of GDP)           | 53.0             | 54.1             | 54.5             | 56.0             |
| Government debt                                                                   | (million euro)       | 87 141           | 93 113           | 103 170          | 110 193          |
|                                                                                   | (% of GDP)           | 48.8             | 49.3             | 53.6             | 57.0             |
| memo: intergovernmental lending<br>in the context of the financial crisis         | (million euro)       | 392              | 1 316            | 3 708            | 4 432            |
|                                                                                   | (% of GDP)           | 0.2              | 0.7              | 1.9              | 2.3              |
| <b>Sweden</b>                                                                     |                      |                  |                  |                  |                  |
| GDP mp                                                                            | (million SEK)        | 3 337 531        | 3 480 543        | 3 549 709        | 3 634 394        |
| Government deficit (-) / surplus (+)                                              | (million SEK)        | 9 844            | 5 635            | -19 706          | -40 356          |
|                                                                                   | (% of GDP)           | 0.3              | 0.2              | -0.6             | -1.1             |
| Government expenditure                                                            | (% of GDP)           | 52.3             | 51.5             | 52.0             | 52.9             |
| Government revenue                                                                | (% of GDP)           | 52.3             | 51.5             | 51.2             | 51.5             |
| Government debt                                                                   | (million SEK)        | 1 316 448        | 1 345 229        | 1 360 326        | 1 474 680        |
|                                                                                   | (% of GDP)           | 39.4             | 38.6             | 38.3             | 40.6             |
| memo: intergovernmental lending<br>in the context of the financial crisis         | (million SEK)        | 0                | 0                | 2 575            | 5 321            |
|                                                                                   | (% of GDP)           | 0.0              | 0.0              | 0.1              | 0.1              |
| <b>United Kingdom*</b>                                                            |                      |                  |                  |                  |                  |
| GDP mp                                                                            | (million GBP)        | 1 485 615        | 1 536 937        | 1 558 415        | 1 613 391        |
| Government deficit (-) / surplus (+)                                              | (million GBP)        | -149 277         | -117 303         | -95 429          | -93 421          |
|                                                                                   | (% of GDP)           | -10.0            | -7.6             | -6.1             | -5.8             |
| Government expenditure                                                            | (% of GDP)           | 49.9             | 47.9             | 48.1             | 47.1             |
| Government revenue                                                                | (% of GDP)           | 39.8             | 40.3             | 42.0             | 41.3             |
| Government debt                                                                   | (million GBP)        | 1 165 456        | 1 295 923        | 1 387 914        | 1 460 975        |
|                                                                                   | (% of GDP)           | 78.4             | 84.3             | 89.1             | 90.6             |
| memo: intergovernmental lending<br>in the context of the financial crisis         | (million GBP)        | 0                | 403              | 2 016            | 3 629            |
|                                                                                   | (% of GDP)           | 0.0              | 0.0              | 0.1              | 0.2              |
| <i>Financial year (fy)</i>                                                        |                      | <i>2010/2011</i> | <i>2011/2012</i> | <i>2012/2013</i> | <i>2013/2014</i> |
| <i>GDP mp</i>                                                                     | <i>(million GBP)</i> | <i>1 499 045</i> | <i>1 547 166</i> | <i>1 565 324</i> | <i>1 644 095</i> |
| <i>Government deficit (-) / surplus (+)</i>                                       | <i>(million GBP)</i> | <i>-141 303</i>  | <i>-117 640</i>  | <i>-81 837</i>   | <i>-98 316</i>   |
|                                                                                   | <i>(% of GDP)</i>    | <i>-9.4</i>      | <i>-7.6</i>      | <i>-5.2</i>      | <i>-6.0</i>      |
| <i>Government debt</i>                                                            | <i>(million GBP)</i> | <i>1 185 579</i> | <i>1 315 859</i> | <i>1 386 742</i> | <i>1 473 360</i> |
|                                                                                   | <i>(% of GDP)</i>    | <i>79.1</i>      | <i>85.0</i>      | <i>88.6</i>      | <i>89.6</i>      |
| <i>memo: intergovernmental lending<br/>in the context of the financial crisis</i> | <i>(million GBP)</i> | <i>0</i>         | <i>1 210</i>     | <i>2 823</i>     | <i>3 629</i>     |
|                                                                                   | <i>(% of GDP)</i>    | <i>0.0</i>       | <i>0.1</i>       | <i>0.2</i>       | <i>0.2</i>       |

\* Data refer to calendar years. Data referring to the financial year (1 April to 31 March), are shown in italics. For the United Kingdom, the relevant data for implementation of the excessive deficit procedure are financial year data.

## Annex 1

### Main revisions between the October 2013 and the April 2014 notifications

Below are shown country specific explanations for the largest revisions in deficit and debt for 2010-2012 between the October 2013 and the April 2014 notifications, as well as in GDP.

Since the October 2013 notification, there have been revisions of the 2012 government balance of -0.3% of GDP in one Member State, of +0.6% of GDP in one, of +0.3% in one and of between -0.2% and +0.2% in twenty-five.

#### Deficit

**Czech Republic:** The decrease in the deficit for 2012 is due to updated source data on taxes.

**Denmark:** The decrease in the deficit for 2012 is due to updated source data mainly on taxes, extra-budgetary units and the local government sub-sector.

**Luxembourg:** The improvement in the government balance for 2012 is mainly due to a revision in tax receivables resulting from updated source data and the correction of investment expenses of the local government sub-sector.

**Slovakia:** The decrease in the deficit for 2011 is due to the reclassification of the Railway Infrastructure Company in the general government sector.

**Sweden:** The increase in the deficit for 2012 is mainly due to updated source data on taxes.

#### Debt

**Belgium:** The increase in the debt for 2010, 2011 and 2012 is mainly due to the inclusion of a number of units in the general government sector, updated source data for the state government sub-sector and other corrections and methodological adjustments which have followed the latest Eurostat EDP visits.

**France:** The increase in the debt for 2010, 2011 and 2012 is mainly due to changes in the sources and methods used to consolidate central government debt and the inclusion of some units in the central government sub-sector.

**Austria:** The increase in the debt for 2010, 2011 and 2012 is mainly due to the inclusion of liabilities not recorded in public accounts of Land Salzburg prior to the 2013 audit by the Federal Audit Office.

#### GDP

The GDP for 2012 notified in April 2014 for EDP purposes was revised by a number of Member States compared with that notified in October 2013, in general by small amounts. An increase of about 1% of GDP for 2010 and 2011 and of about 0.7% for 2012 has been notified by Malta. Changes in GDP affect deficit and debt ratios due to the denominator effect.

**Revisions in government deficit/surplus and government debt ratios**  
from the October 2013 to the April 2014 notification

|                |                                                    | Deficit/surplus* |             |             | Debt       |            |             |
|----------------|----------------------------------------------------|------------------|-------------|-------------|------------|------------|-------------|
|                |                                                    | 2010             | 2011        | 2012        | 2010       | 2011       | 2012        |
| Belgium        | <b>Revision in deficit/surplus and debt ratios</b> | <b>-0.1</b>      | <b>-0.1</b> | <b>-0.1</b> | <b>1.0</b> | <b>1.2</b> | <b>1.3</b>  |
|                | - due to revision of deficit/surplus or debt       | -0.1             | -0.1        | -0.1        | 1.0        | 1.2        | 1.3         |
|                | - due to revision of GDP                           | 0.0              | 0.0         | 0.0         | 0.0        | 0.0        | 0.0         |
| Bulgaria       | <b>Revision in deficit/surplus and debt ratios</b> | <b>0.0</b>       | <b>0.0</b>  | <b>0.0</b>  | <b>0.0</b> | <b>0.0</b> | <b>-0.1</b> |
|                | - due to revision of deficit/surplus or debt       | 0.0              | 0.0         | 0.0         | 0.0        | 0.0        | 0.0         |
|                | - due to revision of GDP                           | 0.0              | 0.0         | 0.0         | 0.0        | 0.0        | -0.1        |
| Czech Republic | <b>Revision in deficit/surplus and debt ratios</b> | <b>0.0</b>       | <b>0.0</b>  | <b>0.2</b>  | <b>0.0</b> | <b>0.0</b> | <b>0.0</b>  |
|                | - due to revision of deficit/surplus or debt       | 0.0              | 0.0         | 0.2         | 0.0        | 0.0        | 0.0         |
|                | - due to revision of GDP                           | 0.0              | 0.0         | 0.0         | 0.0        | 0.0        | 0.0         |
| Denmark        | <b>Revision in deficit/surplus and debt ratios</b> | <b>0.0</b>       | <b>0.0</b>  | <b>0.3</b>  | <b>0.0</b> | <b>0.0</b> | <b>0.0</b>  |
|                | - due to revision of deficit/surplus or debt       | 0.0              | 0.0         | 0.3         | 0.0        | 0.0        | 0.0         |
|                | - due to revision of GDP                           | 0.0              | 0.0         | 0.0         | 0.0        | 0.0        | 0.0         |
| Germany        | <b>Revision in deficit/surplus and debt ratios</b> | <b>0.0</b>       | <b>0.0</b>  | <b>0.0</b>  | <b>0.1</b> | <b>0.0</b> | <b>0.0</b>  |
|                | - due to revision of deficit/surplus or debt       | 0.0              | 0.0         | 0.0         | 0.1        | 0.0        | 0.0         |
|                | - due to revision of GDP                           | 0.0              | 0.0         | 0.0         | 0.0        | 0.0        | 0.0         |
| Estonia        | <b>Revision in deficit/surplus and debt ratios</b> | <b>0.0</b>       | <b>0.0</b>  | <b>0.0</b>  | <b>0.0</b> | <b>0.0</b> | <b>0.0</b>  |
|                | - due to revision of deficit/surplus or debt       | 0.0              | 0.0         | 0.0         | 0.0        | 0.0        | 0.0         |
|                | - due to revision of GDP                           | 0.0              | 0.0         | 0.0         | 0.0        | 0.0        | 0.0         |
| Ireland        | <b>Revision in deficit/surplus and debt ratios</b> | <b>0.0</b>       | <b>0.0</b>  | <b>0.0</b>  | <b>0.0</b> | <b>0.0</b> | <b>0.0</b>  |
|                | - due to revision of deficit/surplus or debt       | 0.0              | 0.0         | 0.0         | 0.0        | 0.0        | 0.0         |
|                | - due to revision of GDP                           | 0.0              | 0.0         | 0.0         | 0.0        | 0.0        | 0.0         |
| Greece         | <b>Revision in deficit/surplus and debt ratios</b> | <b>-0.2</b>      | <b>0.0</b>  | <b>0.1</b>  | <b>0.0</b> | <b>0.0</b> | <b>0.3</b>  |
|                | - due to revision of deficit/surplus or debt       | -0.2             | 0.0         | 0.1         | 0.0        | 0.0        | 0.0         |
|                | - due to revision of GDP                           | 0.0              | 0.0         | 0.0         | 0.0        | 0.0        | 0.3         |
| Spain          | <b>Revision in deficit/surplus and debt ratios</b> | <b>0.0</b>       | <b>0.0</b>  | <b>0.0</b>  | <b>0.0</b> | <b>0.0</b> | <b>0.0</b>  |
|                | - due to revision of deficit/surplus or debt       | 0.0              | 0.0         | 0.0         | 0.0        | 0.0        | 0.0         |
|                | - due to revision of GDP                           | 0.0              | 0.0         | 0.0         | 0.0        | 0.0        | 0.0         |
| France         | <b>Revision in deficit/surplus and debt ratios</b> | <b>0.1</b>       | <b>0.1</b>  | <b>-0.1</b> | <b>0.4</b> | <b>0.4</b> | <b>0.4</b>  |
|                | - due to revision of deficit/surplus or debt       | 0.1              | 0.1         | -0.1        | 0.4        | 0.4        | 0.4         |
|                | - due to revision of GDP                           | 0.0              | 0.0         | 0.0         | 0.0        | 0.0        | 0.0         |
| Croatia        | <b>Revision in deficit/surplus and debt ratios</b> | <b>0.0</b>       | <b>0.0</b>  | <b>0.0</b>  | <b>0.1</b> | <b>0.3</b> | <b>0.4</b>  |
|                | - due to revision of deficit/surplus or debt       | 0.0              | 0.0         | 0.0         | 0.1        | 0.1        | 0.1         |
|                | - due to revision of GDP                           | 0.0              | 0.0         | 0.0         | 0.0        | 0.2        | 0.3         |
| Italy          | <b>Revision in deficit/surplus and debt ratios</b> | <b>0.0</b>       | <b>0.1</b>  | <b>0.0</b>  | <b>0.0</b> | <b>0.0</b> | <b>0.0</b>  |
|                | - due to revision of deficit/surplus or debt       | 0.0              | 0.1         | 0.0         | 0.0        | 0.0        | 0.0         |
|                | - due to revision of GDP                           | 0.0              | 0.0         | 0.0         | 0.0        | 0.0        | 0.0         |
| Cyprus         | <b>Revision in deficit/surplus and debt ratios</b> | <b>0.0</b>       | <b>0.0</b>  | <b>0.0</b>  | <b>0.0</b> | <b>0.0</b> | <b>0.0</b>  |
|                | - due to revision of deficit/surplus or debt       | 0.0              | 0.0         | 0.0         | 0.0        | 0.0        | 0.0         |
|                | - due to revision of GDP                           | 0.0              | 0.0         | 0.0         | 0.0        | 0.0        | 0.0         |
| Latvia         | <b>Revision in deficit/surplus and debt ratios</b> | <b>0.0</b>       | <b>0.0</b>  | <b>0.0</b>  | <b>0.1</b> | <b>0.1</b> | <b>0.2</b>  |
|                | - due to revision of deficit/surplus or debt       | 0.0              | 0.0         | 0.0         | 0.1        | 0.1        | 0.2         |
|                | - due to revision of GDP                           | 0.0              | 0.0         | 0.0         | 0.0        | 0.0        | 0.0         |
| Lithuania      | <b>Revision in deficit/surplus and debt ratios</b> | <b>0.0</b>       | <b>0.0</b>  | <b>0.0</b>  | <b>0.0</b> | <b>0.0</b> | <b>0.0</b>  |
|                | - due to revision of deficit/surplus or debt       | 0.0              | 0.0         | 0.0         | 0.0        | 0.0        | 0.0         |
|                | - due to revision of GDP                           | 0.0              | 0.0         | 0.0         | 0.0        | 0.0        | 0.0         |

\* Revisions to deficit/surplus ratios: a positive sign means an improved government balance relative to GDP, and a negative sign a worsening.

**Revisions in government deficit/surplus and government debt ratios**  
from the October 2013 to the April 2014 notification

|                |                                                    | Deficit/surplus* |             |             | Debt        |             |             |
|----------------|----------------------------------------------------|------------------|-------------|-------------|-------------|-------------|-------------|
|                |                                                    | 2010             | 2011        | 2012        | 2010        | 2011        | 2012        |
| Luxembourg     | <b>Revision in deficit/surplus and debt ratios</b> | <b>0.0</b>       | <b>0.1</b>  | <b>0.6</b>  | <b>0.0</b>  | <b>0.0</b>  | <b>0.0</b>  |
|                | - due to revision of deficit/surplus or debt       | 0.0              | 0.1         | 0.6         | 0.0         | 0.0         | 0.0         |
|                | - due to revision of GDP                           | 0.0              | 0.0         | 0.0         | 0.0         | 0.0         | 0.0         |
| Hungary        | <b>Revision in deficit/surplus and debt ratios</b> | <b>0.0</b>       | <b>0.0</b>  | <b>0.0</b>  | <b>0.0</b>  | <b>0.0</b>  | <b>0.0</b>  |
|                | - due to revision of deficit/surplus or debt       | 0.0              | 0.0         | 0.0         | 0.0         | 0.0         | 0.0         |
|                | - due to revision of GDP                           | 0.0              | 0.0         | 0.0         | 0.0         | 0.0         | 0.0         |
| Malta          | <b>Revision in deficit/surplus and debt ratios</b> | <b>0.1</b>       | <b>0.0</b>  | <b>0.0</b>  | <b>-0.7</b> | <b>-0.7</b> | <b>-0.5</b> |
|                | - due to revision of deficit/surplus or debt       | 0.0              | 0.0         | 0.0         | 0.0         | 0.0         | 0.0         |
|                | - due to revision of GDP                           | 0.0              | 0.0         | 0.0         | -0.7        | -0.7        | -0.5        |
| Netherlands    | <b>Revision in deficit/surplus and debt ratios</b> | <b>0.0</b>       | <b>0.0</b>  | <b>0.0</b>  | <b>0.0</b>  | <b>0.0</b>  | <b>0.0</b>  |
|                | - due to revision of deficit/surplus or debt       | 0.0              | 0.0         | 0.0         | 0.0         | 0.0         | 0.0         |
|                | - due to revision of GDP                           | 0.0              | 0.0         | 0.0         | 0.0         | 0.0         | 0.0         |
| Austria        | <b>Revision in deficit/surplus and debt ratios</b> | <b>0.0</b>       | <b>0.0</b>  | <b>0.0</b>  | <b>0.2</b>  | <b>0.3</b>  | <b>0.4</b>  |
|                | - due to revision of deficit/surplus or debt       | 0.0              | 0.0         | 0.0         | 0.2         | 0.3         | 0.4         |
|                | - due to revision of GDP                           | 0.0              | 0.0         | 0.0         | 0.0         | 0.0         | 0.0         |
| Poland         | <b>Revision in deficit/surplus and debt ratios</b> | <b>0.1</b>       | <b>-0.1</b> | <b>0.1</b>  | <b>0.0</b>  | <b>0.0</b>  | <b>0.0</b>  |
|                | - due to revision of deficit/surplus or debt       | 0.1              | -0.1        | 0.0         | 0.0         | 0.0         | 0.0         |
|                | - due to revision of GDP                           | 0.0              | 0.0         | 0.0         | 0.0         | 0.0         | 0.0         |
| Portugal       | <b>Revision in deficit/surplus and debt ratios</b> | <b>0.0</b>       | <b>0.0</b>  | <b>0.0</b>  | <b>0.0</b>  | <b>0.0</b>  | <b>0.0</b>  |
|                | - due to revision of deficit/surplus or debt       | 0.0              | 0.0         | 0.0         | 0.0         | 0.0         | 0.0         |
|                | - due to revision of GDP                           | 0.0              | 0.0         | 0.0         | 0.0         | 0.0         | 0.0         |
| Romania        | <b>Revision in deficit/surplus and debt ratios</b> | <b>0.0</b>       | <b>0.0</b>  | <b>0.0</b>  | <b>0.0</b>  | <b>0.0</b>  | <b>0.0</b>  |
|                | - due to revision of deficit/surplus or debt       | 0.0              | 0.0         | 0.0         | 0.0         | 0.0         | 0.0         |
|                | - due to revision of GDP                           | 0.0              | 0.0         | 0.0         | 0.0         | 0.0         | 0.0         |
| Slovenia       | <b>Revision in deficit/surplus and debt ratios</b> | <b>0.0</b>       | <b>-0.1</b> | <b>-0.2</b> | <b>0.0</b>  | <b>0.0</b>  | <b>0.0</b>  |
|                | - due to revision of deficit/surplus or debt       | 0.0              | -0.1        | -0.2        | 0.0         | 0.0         | 0.0         |
|                | - due to revision of GDP                           | 0.0              | 0.0         | 0.0         | 0.0         | 0.0         | 0.0         |
| Slovakia       | <b>Revision in deficit/surplus and debt ratios</b> | <b>0.1</b>       | <b>0.3</b>  | <b>0.1</b>  | <b>0.0</b>  | <b>0.3</b>  | <b>0.3</b>  |
|                | - due to revision of deficit/surplus or debt       | 0.1              | 0.3         | 0.1         | 0.0         | 0.3         | 0.3         |
|                | - due to revision of GDP                           | 0.0              | 0.0         | 0.0         | 0.0         | 0.0         | 0.0         |
| Finland        | <b>Revision in deficit/surplus and debt ratios</b> | <b>0.0</b>       | <b>0.0</b>  | <b>0.0</b>  | <b>0.1</b>  | <b>0.1</b>  | <b>0.1</b>  |
|                | - due to revision of deficit/surplus or debt       | 0.0              | 0.0         | 0.0         | 0.1         | 0.1         | 0.0         |
|                | - due to revision of GDP                           | 0.0              | 0.0         | 0.0         | 0.0         | 0.0         | 0.1         |
| Sweden         | <b>Revision in deficit/surplus and debt ratios</b> | <b>0.0</b>       | <b>0.0</b>  | <b>-0.3</b> | <b>0.0</b>  | <b>0.0</b>  | <b>0.1</b>  |
|                | - due to revision of deficit/surplus or debt       | 0.0              | 0.0         | -0.3        | 0.0         | 0.0         | 0.1         |
|                | - due to revision of GDP                           | 0.0              | 0.0         | 0.0         | 0.0         | 0.0         | 0.0         |
| United Kingdom | <b>Revision in deficit/surplus and debt ratios</b> | <b>0.0</b>       | <b>0.1</b>  | <b>0.0</b>  | <b>0.0</b>  | <b>0.0</b>  | <b>0.4</b>  |
|                | - due to revision of deficit/surplus or debt       | 0.0              | 0.1         | 0.0         | 0.0         | 0.0         | 0.0         |
|                | - due to revision of GDP                           | 0.0              | 0.0         | 0.0         | 0.0         | 0.0         | 0.4         |
| EU28           | <b>Revision in deficit/surplus and debt ratios</b> | <b>0.0</b>       | <b>0.0</b>  | <b>0.0</b>  | <b>0.1</b>  | <b>0.1</b>  | <b>0.2</b>  |
|                | - due to revision of deficit/surplus or debt       | 0.0              | 0.0         | 0.0         | 0.1         | 0.1         | 0.1         |
|                | - due to revision of GDP                           | 0.0              | 0.0         | 0.0         | 0.0         | 0.0         | 0.0         |
| EA18           | <b>Revision in deficit/surplus and debt ratios</b> | <b>0.0</b>       | <b>0.0</b>  | <b>0.0</b>  | <b>0.1</b>  | <b>0.2</b>  | <b>0.2</b>  |
|                | - due to revision of deficit/surplus or debt       | 0.0              | 0.0         | 0.0         | 0.1         | 0.2         | 0.2         |
|                | - due to revision of GDP                           | 0.0              | 0.0         | 0.0         | 0.0         | 0.0         | 0.0         |

\* Revisions to deficit/surplus ratios: a positive sign means an improved government balance relative to GDP, and a negative sign a worsening.

## Annex 2

### Supplementary tables for the financial crisis Activities undertaken by government to support financial institutions<sup>1</sup>

**Table 1: Net revenue/cost for general government recorded in ESA95 government deficit**  
Millions of euro

|          |                                                                      | Euro area (EA18) |               |                |                | EU28           |               |                |                |
|----------|----------------------------------------------------------------------|------------------|---------------|----------------|----------------|----------------|---------------|----------------|----------------|
|          |                                                                      | 2010             | 2011          | 2012           | 2013           | 2010           | 2011          | 2012           | 2013           |
| <b>A</b> | <b>Revenue (a+b+c+d)</b>                                             | <b>14 415</b>    | <b>19 727</b> | <b>21 531</b>  | <b>17 096</b>  | <b>21 104</b>  | <b>26 980</b> | <b>28 981</b>  | <b>20 179</b>  |
| a)       | Guarantee fees receivable                                            | 6 267            | 6 160         | 5 907          | 4 786          | 9 219          | 9 050         | 7 254          | 5 222          |
| b)       | Interest receivable                                                  | 6 363            | 9 850         | 9 535          | 7 574          | 9 549          | 13 507        | 12 764         | 10 128         |
| c)       | Dividends receivable                                                 | 1 471            | 2 650         | 2 259          | 3 049          | 1 543          | 2 731         | 5 133          | 3 142          |
| d)       | Other                                                                | 315              | 1 067         | 3 830          | 1 687          | 794            | 1 691         | 3 830          | 1 687          |
| <b>B</b> | <b>Expenditure (e+f+g+h)</b>                                         | <b>81 201</b>    | <b>29 345</b> | <b>73 702</b>  | <b>45 498</b>  | <b>85 569</b>  | <b>35 463</b> | <b>78 532</b>  | <b>49 410</b>  |
| e)       | Interest payable <sup>2</sup>                                        | 9 260            | 11 656        | 10 788         | 10 716         | 12 511         | 14 964        | 14 161         | 13 539         |
| f)       | Capital injections recorded as deficit-increasing (capital transfer) | 35 783           | 14 856        | 48 900         | 25 690         | 35 815         | 15 194        | 48 945         | 25 726         |
| g)       | Calls on guarantees                                                  | 450              | 492           | 15             | 1 086          | 450            | 1 582         | 15             | 1 086          |
| h)       | Other                                                                | 35 709           | 2 340         | 13 999         | 8 005          | 36 793         | 3 723         | 15 411         | 9 059          |
| <b>C</b> | <b>Net revenue/cost for general government (A-B)</b>                 | <b>-66 786</b>   | <b>-9 618</b> | <b>-52 170</b> | <b>-28 402</b> | <b>-64 464</b> | <b>-8 483</b> | <b>-49 550</b> | <b>-29 231</b> |
|          | <b>Net revenue/cost for general government (A-B) (% of GDP)</b>      | <b>-0.73</b>     | <b>-0.10</b>  | <b>-0.55</b>   | <b>-0.30</b>   | <b>-0.52</b>   | <b>-0.07</b>  | <b>-0.38</b>   | <b>-0.22</b>   |

Source: Eurostat

**Table 2: Outstanding amount of assets, actual liabilities<sup>4</sup> and contingent liabilities of general government**  
Millions of euro<sup>3</sup>

|                                             |                                     | Euro area (EA18)                                                                 |                |                |                | EU28           |                  |                |                |                |
|---------------------------------------------|-------------------------------------|----------------------------------------------------------------------------------|----------------|----------------|----------------|----------------|------------------|----------------|----------------|----------------|
|                                             |                                     | 2010                                                                             | 2011           | 2012           | 2013           | 2010           | 2011             | 2012           | 2013           |                |
| General government                          | Assets<br>(D=a+b+c)                 | <b>D Closing balance sheet</b>                                                   | <b>386 737</b> | <b>347 884</b> | <b>362 968</b> | <b>297 780</b> | <b>581 477</b>   | <b>499 851</b> | <b>527 497</b> | <b>448 674</b> |
|                                             |                                     | a Loans                                                                          | 25 552         | 29 199         | 46 693         | 23 832         | 133 629          | 127 436        | 137 506        | 104 805        |
|                                             |                                     | b Securities other than shares                                                   | 245 948        | 223 333        | 217 120        | 159 547        | 263 270          | 239 928        | 231 373        | 165 540        |
|                                             |                                     | c Shares and other equity                                                        | 115 237        | 95 352         | 99 155         | 114 401        | 184 579          | 132 487        | 158 618        | 178 329        |
|                                             | Liabilities<br>(E=d+e)              | <b>E Closing balance sheet recorded in ESA95 government debt</b>                 | <b>467 760</b> | <b>458 333</b> | <b>531 611</b> | <b>480 715</b> | <b>677 315</b>   | <b>655 534</b> | <b>717 188</b> | <b>647 353</b> |
| d Loans                                     |                                     | 244 535                                                                          | 212 173        | 191 573        | 133 012        | 245 530        | 212 672          | 191 573        | 133 012        |                |
| e Securities other than shares <sup>4</sup> |                                     | 223 225                                                                          | 246 160        | 340 038        | 347 703        | 431 785        | 442 862          | 525 615        | 514 341        |                |
| Outside general government                  | Contingent liabilities<br>(F=f+g+h) | <b>F Closing balance sheet not recorded in ESA 95 debt</b>                       | <b>580 283</b> | <b>576 283</b> | <b>579 236</b> | <b>502 911</b> | <b>1 051 842</b> | <b>810 199</b> | <b>602 048</b> | <b>505 189</b> |
|                                             |                                     | f Liabilities and assets outside general government under guarantee <sup>5</sup> | 473 362        | 490 849        | 490 475        | 402 561        | 806 637          | 629 609        | 502 904        | 404 258        |
|                                             |                                     | g Securities issued under liquidity schemes <sup>6</sup>                         | 7 939          | 2 708          | 2 761          | 2 424          | 145 029          | 97 285         | 12 564         | 2 424          |
|                                             |                                     | h Special purpose entities <sup>7</sup>                                          | 98 982         | 82 726         | 86 000         | 97 926         | 100 176          | 83 304         | 86 580         | 98 507         |
| (% of GDP)                                  |                                     | <b>D Closing balance sheet - assets</b>                                          | <b>4.2</b>     | <b>3.7</b>     | <b>3.8</b>     | <b>3.1</b>     | <b>4.7</b>       | <b>3.9</b>     | <b>4.1</b>     | <b>3.4</b>     |
|                                             |                                     | <b>E Closing balance sheet - liabilities</b>                                     | <b>5.1</b>     | <b>4.9</b>     | <b>5.6</b>     | <b>5.0</b>     | <b>5.5</b>       | <b>5.2</b>     | <b>5.5</b>     | <b>5.0</b>     |
|                                             |                                     | <b>F Closing balance sheet - contingent liabilities</b>                          | <b>6.3</b>     | <b>6.1</b>     | <b>6.1</b>     | <b>5.2</b>     | <b>8.5</b>       | <b>6.4</b>     | <b>4.6</b>     | <b>3.9</b>     |

Source: Eurostat

The supplementary tables for the financial crisis aim to give a complete picture of the actual and potential impact on government deficit and debt due to government interventions directly related to the support of financial institutions. Support measures for non financial institutions or general economic support measures are not included in the tables.

The first table relates to data on transactions which are recorded in government accounts and have an actual impact on the EDP deficit/surplus. The second table relates to data on stocks of financial assets and liabilities arising from interventions relating to support of financial institutions. It distinguishes between activities which have contributed to government liabilities (included in government debt) and activities which may potentially contribute to

government liabilities in the future, but which are currently recorded as contingent on future events (not included for the moment in government debt).

In particular, line C in table 1 shows the net impact in terms of government surplus/deficit for government due to direct government interventions in the financial crisis. It can be seen that government interventions in the context of the financial crisis increased the government deficit in the **EU28** by 29.23 bn euro (0.22% of GDP) in 2013. For the **euro area**, the net impact amounted to 28.40 bn (0.30% of GDP) in 2013.

Table 2 shows that the impact on government debt in 2013 (closing balance sheet for liabilities) for the **EU28** was 647.35 bn euro (5.0% of GDP), while for the **euro area** the figure was 480.71 bn (5.0% of GDP). As far as contingent liabilities are concerned (with a potential impact on debt and possibly on deficit), they amounted to 505.19 bn (3.9% of GDP) for the **EU28** and to 502.91 bn (5.2% of GDP) for the **euro area**.

Further tables on actual and potential impact on government deficit and debt, by Member State, can be found on Eurostat's website at:

[http://epp.eurostat.ec.europa.eu/portal/page/portal/government\\_finance\\_statistics/excessive\\_deficit/supplementary\\_tables\\_financial\\_turmoil](http://epp.eurostat.ec.europa.eu/portal/page/portal/government_finance_statistics/excessive_deficit/supplementary_tables_financial_turmoil)

1. These tables relate to activities undertaken to support financial institutions. They do not include wider economic stimulus packages.
2. Interest payable includes actual interest where relevant, and otherwise imputed interest on financing.
3. The appropriate valuation for all entries in Table 2 is nominal value, except for ordinary quoted shares held as assets (which are recorded at market value).
4. By convention, for the liabilities entry under "general government" (which is the impact on Maastricht Debt from activities to support financial institutions), there is assumed to be a direct impact on government debt from activities which imply a transfer of cash from government (e.g. transfer of cash relating to capital injections, loans granted, purchase of financial assets), except for the impact from direct borrowing. In addition, imputations relating to the financing costs should be included.
5. Guarantees covered are those granted by general government to non-general government financial institutions. It does not include guarantees on bank deposits, or guarantees on the liabilities of special purpose entities included in (h). It is only the value of active guarantees, not announced ceilings for schemes. It also includes guarantees on assets, which would imply incurrence of government liability in case of a call.
6. Liquidity schemes included here are those where the government securities used are not recorded in government debt (see the Eurostat Decision and accompanying guidance note for details). By convention, they are recorded as "contingent liabilities outside the general government", as for guarantees, though it should be noted that the exposure of government is likely to be limited.
7. Special purpose entities included here are those where government has a significant role, including a guarantee, but which are classified outside the general government sector (see the Eurostat Decision and accompanying guidance note for details). Their liabilities are recorded outside the general government sector (as contingent liabilities of general government).

### Annex 3 Quarterly government debt

From the end of the third quarter to the end of the fourth quarter of 2013, the government debt to GDP ratio in the **euro area (EA18)** decreased from 92.7% to 92.6% of GDP. In the **EU28** the ratio increased from 87.0% to 87.1%.

**Table 1: Quarterly government debt structure, 2013Q4 compared with 2013Q3\***

|                                                                        |                   | 2013Q3     | 2013Q4     |
|------------------------------------------------------------------------|-------------------|------------|------------|
| <b>EA18</b>                                                            |                   |            |            |
| Government debt                                                        | (million euro)    | 8 871 039  | 8 890 375  |
|                                                                        | (% of GDP)        | 92.7       | 92.6       |
| Of which: Currency and deposits                                        | (million euro)    | 244 569    | 248 518    |
|                                                                        | (% of total debt) | 2.8        | 2.8        |
| Securities other than shares                                           | (million euro)    | 7 021 027  | 7 017 639  |
|                                                                        | (% of total debt) | 79.1       | 78.9       |
| Loans                                                                  | (million euro)    | 1 605 441  | 1 624 217  |
|                                                                        | (% of total debt) | 18.1       | 18.3       |
| Memo: Intergovernmental lending in the context of the financial crisis | (million euro)    | 224 483    | 230 950    |
|                                                                        | (% of GDP)        | 2.3        | 2.4        |
| <b>EU28</b>                                                            |                   |            |            |
| Government debt                                                        | (million euro)    | 11 330 548 | 11 386 020 |
|                                                                        | (% of GDP)        | 87.0       | 87.1       |
| Of which: Currency and deposits                                        | (million euro)    | 412 351    | 409 272    |
|                                                                        | (% of total debt) | 3.6        | 3.6        |
| Securities other than shares                                           | (million euro)    | 9 149 181  | 9 185 536  |
|                                                                        | (% of total debt) | 80.7       | 80.7       |
| Loans                                                                  | (million euro)    | 1 769 015  | 1 791 210  |
|                                                                        | (% of total debt) | 15.6       | 15.7       |
| Memo: Intergovernmental lending in the context of the financial crisis | (million euro)    | 229 567    | 236 393    |
|                                                                        | (% of GDP)        | 1.8        | 1.8        |

\* Quarterly GDP figures for the EU28 and EA18 have been benchmarked to the most up-to-date annual GDP figures.

Compared with the third quarter of 2013, twelve Member States registered an increase in their debt to GDP ratio at the end of the fourth quarter of 2013, fourteen a decrease and two remained stable. The highest increases in the ratio were recorded in **Slovenia** (+9.2 percentage points - pp), **Croatia** (+5.2 pp) and **Greece** (+3.0 pp), and the largest decreases in **Luxembourg** (-4.6 pp), **Belgium** (-3.6 pp), **Malta** (-3.2 pp) and **Austria** (-2.9 pp).

**Figure 1: Changes in government debt to GDP\* ratio, 2013Q4 compared with 2013Q3, in percentage points**

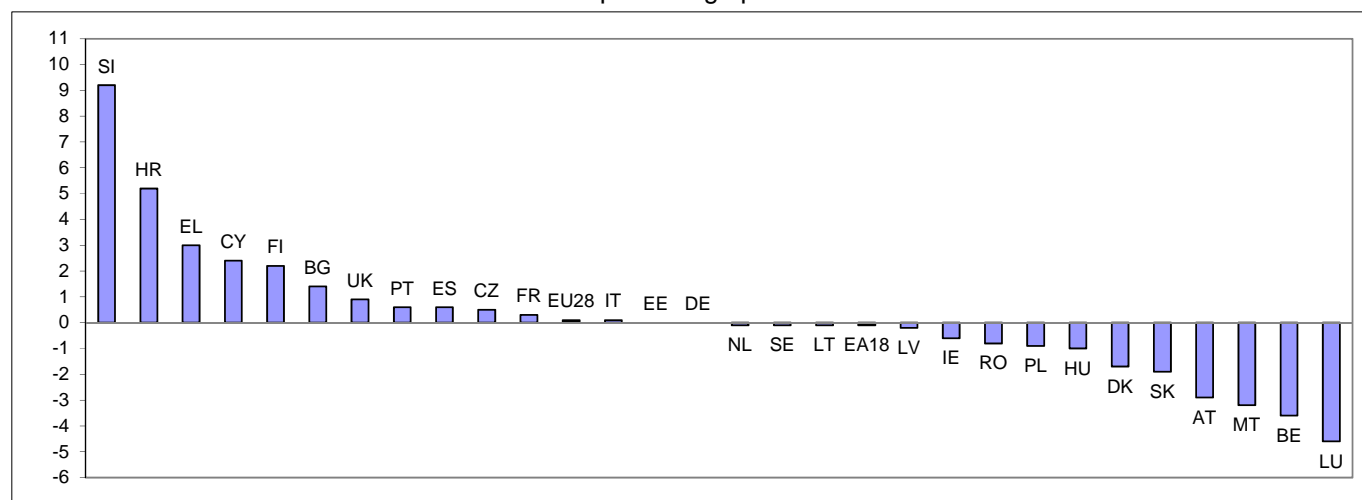

\* Quarterly GDP figures for the EU28, EA18, Denmark and Poland have been benchmarked to the most up-to-date annual GDP figures by Eurostat.

**Table 2: Quarterly government debt by Member State**

|                       |      | Millions of national currency |            | % of GDP |         | Difference in pp of GDP, Q4/2013 compared with Q3/2013 |
|-----------------------|------|-------------------------------|------------|----------|---------|--------------------------------------------------------|
|                       |      | Q3/2013                       | Q4/2013    | Q3/2013  | Q4/2013 |                                                        |
| <b>Belgium</b>        | euro | 398 887                       | 387 159    | 105.1    | 101.5   | -3.6                                                   |
| <b>Bulgaria</b>       | BGN  | 13 617                        | 14 733     | 17.5     | 18.9    | 1.4                                                    |
| <b>Czech Republic</b> | CZK  | 1 752 884                     | 1 788 209  | 45.5     | 46.0    | 0.5                                                    |
| <b>Denmark*</b>       | DKK  | 855 609                       | 826 861    | 46.2     | 44.5    | -1.8                                                   |
| <b>Germany</b>        | euro | 2 129 636                     | 2 147 028  | 78.5     | 78.4    | 0.0                                                    |
| <b>Estonia</b>        | euro | 1 817                         | 1 845      | 10.0     | 10.0    | 0.0                                                    |
| <b>Ireland</b>        | euro | 204 538                       | 202 920    | 124.3    | 123.7   | -0.6                                                   |
| <b>Greece</b>         | euro | 317 313                       | 318 703    | 172.1    | 175.1   | 3.0                                                    |
| <b>Spain</b>          | euro | 954 947                       | 960 676    | 93.3     | 93.9    | 0.6                                                    |
| <b>France</b>         | euro | 1 911 913                     | 1 925 292  | 93.2     | 93.5    | 0.3                                                    |
| <b>Croatia**</b>      | HRK  | 203 825                       | 220 196    | 61.9     | 67.1    | 5.2                                                    |
| <b>Italy</b>          | euro | 2 068 627                     | 2 069 216  | 132.6    | 132.6   | 0.1                                                    |
| <b>Cyprus</b>         | euro | 18 403                        | 18 442     | 109.3    | 111.7   | 2.4                                                    |
| <b>Latvia</b>         | euro | 8 807                         | 8 873      | 38.2     | 38.1    | -0.2                                                   |
| <b>Lithuania</b>      | LTL  | 46 704                        | 47 112     | 39.5     | 39.4    | -0.1                                                   |
| <b>Luxembourg</b>     | euro | 12 456                        | 10 512     | 27.7     | 23.1    | -4.6                                                   |
| <b>Hungary</b>        | HUF  | 23 090 195                    | 23 067 975 | 80.3     | 79.2    | -1.0                                                   |
| <b>Malta</b>          | euro | 5 409                         | 5 243      | 76.1     | 73.0    | -3.2                                                   |
| <b>Netherlands</b>    | euro | 442 163                       | 443 008    | 73.6     | 73.5    | -0.1                                                   |
| <b>Austria</b>        | euro | 240 986                       | 233 303    | 77.4     | 74.5    | -2.9                                                   |
| <b>Poland*</b>        | PLN  | 940 181                       | 932 509    | 57.9     | 57.0    | -0.9                                                   |
| <b>Portugal</b>       | euro | 210 972                       | 213 631    | 128.3    | 129.0   | 0.6                                                    |
| <b>Romania</b>        | RON  | 238 896                       | 241 445    | 39.2     | 38.4    | -0.8                                                   |
| <b>Slovenia</b>       | euro | 21 921                        | 25 307     | 62.6     | 71.7    | 9.2                                                    |
| <b>Slovakia</b>       | euro | 41 181                        | 39 975     | 57.3     | 55.4    | -1.9                                                   |
| <b>Finland</b>        | euro | 105 546                       | 110 193    | 54.8     | 57.0    | 2.2                                                    |
| <b>Sweden</b>         | SEK  | 1 463 064                     | 1 474 680  | 40.7     | 40.6    | -0.1                                                   |
| <b>United Kingdom</b> | GBP  | 1 431 469                     | 1 460 975  | 89.6     | 90.6    | 0.9                                                    |

\* Quarterly GDP figures for Denmark and Poland have been benchmarked to the most up-to-date annual GDP figures by Eurostat.

\*\* Provisional

Further data are available in the publication on quarterly government finance statistics:  
[http://epp.eurostat.ec.europa.eu/portal/page/portal/government\\_finance\\_statistics/data](http://epp.eurostat.ec.europa.eu/portal/page/portal/government_finance_statistics/data)
