# Supplementary material
Source: publisher figshare collection journal article supplement (https://tandf.figshare.com/articles/dataset/_/4793563)
Supplement: Supplementary file 3 [file 1]

Provision of deficit and debt data for 2007 - second notification

## **Euro area and EU27 government deficit at 0.6% and 0.9% of GDP respectively**

**Government debt at 66.3% and 58.7%**

In 2007, the government deficit<sup>1</sup> of both the **euro area**<sup>2</sup> (EA15) and the **EU27** fell compared with 2006, while the government debt<sup>1</sup> increased in absolute terms. In the **euro area** the government deficit decreased from 1.3% of GDP in 2006 to 0.6% in 2007<sup>3</sup>, and in the **EU27** it fell from 1.4% to 0.9%. In the **euro area** the government debt to GDP ratio fell from 68.5% at the end of 2006 to 66.3% at the end of 2007, and in the **EU27** from 61.3% to 58.7%.

|                                      |                | 2004       | 2005       | 2006       | 2007       |
|--------------------------------------|----------------|------------|------------|------------|------------|
| <b>Euro area (EA15)</b>              |                |            |            |            |            |
| GDP market prices (mp)               | (million euro) | 7 820 461  | 8 110 080  | 8 504 375  | 8 927 499  |
| Government deficit (-) / surplus (+) | (million euro) | -228 612   | -203 031   | -107 956   | -55 538    |
|                                      | % of GDP       | -2.9       | -2.5       | -1.3       | -0.6       |
| Government expenditure               | % of GDP       | 47.6       | 47.4       | 46.7       | 46.1       |
| Government revenue                   | % of GDP       | 44.6       | 44.8       | 45.4       | 45.5       |
| Government debt                      | (million euro) | 5 442 080  | 5 692 630  | 5 822 676  | 5 920 457  |
|                                      | % of GDP       | 69.6       | 70.2       | 68.5       | 66.3       |
| <b>EU27</b>                          |                |            |            |            |            |
| GDP mp                               | (million euro) | 10 602 759 | 11 062 422 | 11 672 988 | 12 342 115 |
| Government deficit (-) / surplus (+) | (million euro) | -303 952   | -270 312   | -165 793   | -106 029   |
|                                      | % of GDP       | -2.9       | -2.4       | -1.4       | -0.9       |
| Government expenditure               | % of GDP       | 46.9       | 46.9       | 46.3       | 45.8       |
| Government revenue                   | % of GDP       | 44.0       | 44.4       | 44.9       | 45.0       |
| Government debt                      | (million euro) | 6 590 308  | 6 931 301  | 7 158 749  | 7 249 553  |
|                                      | % of GDP       | 62.2       | 62.7       | 61.3       | 58.7       |

In 2007 the largest government deficits in percentage of GDP were recorded by **Hungary** (-5.0%), **Greece** (-3.5%), the **United Kingdom** (-2.8%), **France** (-2.7%), **Portugal** (-2.6%) and **Romania** (-2.6%). Twelve Member States registered a government surplus in 2007: **Finland** (+5.3%), **Denmark** (+4.9%), **Sweden** (+3.6%), **Cyprus** (+3.5%), **Luxembourg** (+3.2%), **Estonia** (+2.7%), **Spain** (+2.2%), **Slovenia** (+0.5%), **Netherlands** (+0.3%), **Ireland** (+0.2%), **Bulgaria** (+0.1%) and **Latvia** (+0.1%). In all, 16 Member States recorded an improved government balance relative to GDP in 2007 compared with 2006, and 11 a worsening.

At the end of 2007, the lowest ratios of government debt to GDP were recorded in **Estonia** (3.5%), **Luxembourg** (7.0%), **Latvia** (9.5%) and **Romania** (12.9%). Eight Member States had government debt ratios higher than 60% of GDP in 2007: **Italy** (104.1%), **Greece** (94.8%), **Belgium** (83.9%), **Hungary** (65.8%), **Germany** (65.1%), **France** (63.9%), **Portugal** (63.6%) and **Malta** (62.2%).

In 2007, government expenditure<sup>4</sup> in the **euro area** was equivalent to 46.1% of GDP, and government revenue<sup>4</sup> to 45.5%. The figures for the **EU27** were 45.8% and 45.0% respectively. In both zones, the government expenditure ratio decreased between 2006 and 2007, while the government revenue ratio increased slightly.

## Reservations on reported data<sup>5</sup>

**Greece:** Eurostat has withdrawn the reservation on the data reported by Greece in the April 2008 notification (News Release 54/2008 of 18 April 2008 on the provision of data for the excessive deficit procedure). Issues clarified since April 2008 concern the recording of EU grants (in 2006 and 2007), statistical discrepancies (for 2007 data) and the coverage of source data for extra-budgetary funds, local government and social security funds. The Greek authorities have agreed with Eurostat a list of medium-term actions to be implemented.

**United Kingdom:** In 2007 the Bank of England made a loan of GBP 26.93 bn (1.9% of GDP) to Northern Rock Bank in the context of a rescue operation. Eurostat has taken the provisional view that the Bank of England lending to Northern Rock should have government as the principal party of the transaction in the national account framework. If the loan were to be treated in this way, the debt to GDP ratio would be 46.1% at end 2007 and 44.9% at end 2007/2008. The issue will be the object of further discussion with the Office for National Statistics (ONS). The lending to Northern Rock Bank has no direct impact on the UK government deficit for 2007.

## Amendment by Eurostat to reported data<sup>6</sup>

**United Kingdom:** Eurostat has amended the deficit data notified by the United Kingdom for years 2004 to 2007 for consistency of recording of UMTS licences proceeds in 2000. This leads to an increase in the government deficit in 2004, 2005 and 2007 (as well as for financial year 2004/2005, 2005/2006 and 2007/2008) by GBP 1044 mn (0.1% of GDP) and in 2006 (financial year 2006/2007) by GBP 1045 mn (0.1% of GDP). There is no change in the reported debt figures.

## Other issues

Governments have implemented or announced a number of measures in support of financial stability. As far as 2008 is concerned, Eurostat is examining the statistical treatment of these bank rescue operations to ensure a consistent approach.

## Background

In this News Release **Eurostat, the Statistical Office of the European Communities**, is providing<sup>7</sup> government deficit and debt data based on figures reported in the **second 2008 notification** by EU Member States for the years 2004-2007, for the application of the excessive deficit procedure (EDP). This notification is based on the ESA95 system of national accounts. This News Release also includes data on government expenditure and revenue and an annex with the main revisions since the April 2008 News Release.

Eurostat will also be releasing information on the underlying government sector accounts, as well as on the contribution of deficit/surplus and other relevant factors to the variation in the debt level (stock-flow adjustment), on the government finance statistics section on its website:

[http://epp.eurostat.ec.europa.eu/pls/portal/url/page/PGP\\_DS\\_GFS/PGE\\_DS\\_GFS\\_0](http://epp.eurostat.ec.europa.eu/pls/portal/url/page/PGP_DS_GFS/PGE_DS_GFS_0)

1. According to the Protocol on the excessive deficit procedure annexed to the EC Treaty, government deficit (surplus) means the net borrowing (net lending) of the whole general government sector (central government, state government, local government and social security funds). It is calculated according to national accounts concepts (European System of Accounts, ESA95). Government debt is the consolidated gross debt of the whole general government sector outstanding at the end of the year (at nominal value).
  - Table of euro area and EU27 aggregates: the data are in euro. For those countries not belonging to the euro area, the rate of conversion into euro is as follows:
    - for deficit / surplus and GDP data, the annual average exchange rate;
    - for the stock of government debt, the end of year exchange rate.
  - Table of national data: these are in national currencies. For Cyprus, Malta and Slovenia data for the years prior to the adoption of the euro have been converted into euro according to the irrevocable conversion rate.
2. Euro area (EA15): Belgium, Germany, Greece, Spain, France, Ireland, Italy, Cyprus, Luxembourg, Malta, Netherlands, Austria, Portugal, Slovenia and Finland. In the attached tables, the euro area is defined as including Cyprus, Malta and Slovenia for the full period, although Slovenia joined the euro area on 1 January 2007, and Cyprus and Malta on 1 January 2008.
3. In the previous provision of data for the excessive deficit procedure, the 2007 government deficits for the EA15 and the EU27 were 0.6% and 0.9% of GDP respectively. The government debt of the EA15 was 66.3% of GDP and of the EU27 58.7% of GDP. See News Release 54/2008 of 18 April 2008.
4. Government expenditure and revenue are reported to Eurostat under the ESA95 transmission programme. They are the sum of non-financial transactions by general government, and include both current and capital transactions. For definitions, see Council Regulation No. 2223/96, as amended. It should be noted that the government balance (i.e. the difference between total government revenue and expenditure) is not exactly the same under ESA95 as that for the purpose of the excessive deficit procedure. Regulation (EC) No 2558/2001 on the reclassification of settlements under swaps agreements and forward rate agreements implies that there are two relevant definitions of government deficit/surplus:

- The ESA95 definition of net lending /net borrowing does not include streams of payments and receipts resulting from swap agreements and forward rate agreements, as these are recorded as financial transaction;
- For the purpose of the excessive deficit procedure, streams of payments and receipts resulting from swaps and forward rate agreements are recorded as interest expenditure and contribute to the net lending/net borrowing of general government.

Concerning 2007, for most Member States the difference, if any, between the two balances is minor except in **Greece** (+0.28%) and **Austria** (+0.13%). These differences improve net lending/net borrowing for EDP purposes for both these countries.

5. The term "reservations" is defined in article 8h(1) of Council Regulation 3605/93, as amended. The Commission (Eurostat) expresses reservations when it has doubts on the quality of the reported data.
6. According to Article 8h(2) of Council Regulation 3605/93 as amended, the Commission (Eurostat) may amend actual data reported by Member States and provide the amended data and a justification of the amendment where there is evidence that actual data reported by Member States do not comply with the quality requirements (compliance with accounting rules, completeness, reliability, timeliness and consistency of statistical data).
7. According to Article 8g(1) of Council Regulation 3605/93, Eurostat provides the actual government deficit and debt data for the application of the Protocol on the excessive deficit procedure, within three weeks after the reporting deadlines. This provision of data shall be effected through publication.

*For further information on the methodology of statistics reported under the excessive deficit procedure, please see Council Regulation 3605/93, as amended (consolidated version available at <http://eur-lex.europa.eu/LexUriServ/site/en/consleg/1993/R/01993R3605-20051223-en.pdf>), Council Regulation 2223/96, as amended (consolidated version available at <http://eur-lex.europa.eu/LexUriServ/site/en/consleg/1996/R/01996R2223-20030807-en.pdf>) and the Eurostat publication "**ESA95 manual on government deficit and debt**", second edition (2002), 240 pages, ISBN 92-894-3231-4, pdf file free of charge, paper copy 37 euro (excluding VAT). Additions to this manual on securitisation, capital injections, classification of funded pension schemes, lump sum payments to government in the context of the transfer of pension obligations, and long term contracts between government units and non-government partners are available in the government finance statistics section on the Eurostat website.*

Issued by:  
**Eurostat Press Office**

**Tim ALLEN**  
**Tel: +352-4301-33 444**  
**[eurostat-pressoffice@ec.europa.eu](mailto:eurostat-pressoffice@ec.europa.eu)**

Eurostat news releases on the Internet:  
**<http://ec.europa.eu/eurostat>**

Selected Principal European Economic Indicators:  
**<http://ec.europa.eu/eurostat/euroindicators>**

**GDP, government deficit/surplus and debt in the EU (in national currencies)**

|                                      |                | 2004      | 2005      | 2006      | 2007      |
|--------------------------------------|----------------|-----------|-----------|-----------|-----------|
| <b>Belgium</b>                       |                |           |           |           |           |
| GDP mp                               | (million euro) | 289 629   | 302 112   | 318 223   | 334 917   |
| Government deficit (-) / surplus (+) | (million euro) | -532      | -7 750    | 1 093     | -966      |
|                                      | % of GDP       | -0.2      | -2.6      | 0.3       | -0.3      |
| Government expenditure               | % of GDP       | 49.4      | 52.1      | 48.4      | 48.4      |
| Government revenue                   | % of GDP       | 49.1      | 49.4      | 48.7      | 48.1      |
| Government debt                      | (million euro) | 273 173   | 278 392   | 279 467   | 280 958   |
|                                      | % of GDP       | 94.3      | 92.1      | 87.8      | 83.9      |
| <b>Bulgaria</b>                      |                |           |           |           |           |
| GDP mp                               | (million BGN)  | 38 823    | 42 797    | 49 361    | 56 520    |
| Government deficit (-) / surplus (+) | (million BGN)  | 606       | 809       | 1 487     | 70        |
|                                      | % of GDP       | 1.6       | 1.9       | 3.0       | 0.1       |
| Government expenditure               | % of GDP       | 39.7      | 39.3      | 36.5      | 41.5      |
| Government revenue                   | % of GDP       | 41.3      | 41.2      | 39.5      | 41.6      |
| Government debt                      | (million BGN)  | 14 720    | 12 498    | 11 189    | 10 287    |
|                                      | % of GDP       | 37.9      | 29.2      | 22.7      | 18.2      |
| <b>Czech Republic</b>                |                |           |           |           |           |
| GDP mp                               | (million CZK)  | 2 814 762 | 2 983 862 | 3 215 642 | 3 530 249 |
| Government deficit (-) / surplus (+) | (million CZK)  | -83 278   | -106 749  | -85 902   | -34 864   |
|                                      | % of GDP       | -3.0      | -3.6      | -2.7      | -1.0      |
| Government expenditure               | % of GDP       | 45.1      | 45.0      | 43.8      | 42.6      |
| Government revenue                   | % of GDP       | 42.2      | 41.4      | 41.2      | 41.6      |
| Government debt                      | (million CZK)  | 855 102   | 888 579   | 951 474   | 1 020 695 |
|                                      | % of GDP       | 30.4      | 29.8      | 29.6      | 28.9      |
| <b>Denmark</b>                       |                |           |           |           |           |
| GDP mp                               | (million DKK)  | 1 466 200 | 1 548 200 | 1 641 500 | 1 696 300 |
| Government deficit (-) / surplus (+) | (million DKK)  | 29 300    | 80 500    | 83 100    | 82 600    |
|                                      | % of GDP       | 2.0       | 5.2       | 5.1       | 4.9       |
| Government expenditure               | % of GDP       | 54.6      | 52.7      | 51.2      | 50.8      |
| Government revenue                   | % of GDP       | 56.4      | 57.7      | 56.1      | 55.6      |
| Government debt                      | (million DKK)  | 641 900   | 563 100   | 500 100   | 443 900   |
|                                      | % of GDP       | 43.8      | 36.4      | 30.5      | 26.2      |
| <b>Germany</b>                       |                |           |           |           |           |
| GDP mp                               | (million euro) | 2 210 900 | 2 243 200 | 2 321 500 | 2 422 900 |
| Government deficit (-) / surplus (+) | (million euro) | -83 520   | -74 050   | -35 620   | -3 950    |
|                                      | % of GDP       | -3.8      | -3.3      | -1.5      | -0.2      |
| Government expenditure               | % of GDP       | 47.1      | 46.8      | 45.3      | 43.8      |
| Government revenue                   | % of GDP       | 43.3      | 43.5      | 43.8      | 43.9      |
| Government debt                      | (million euro) | 1 451 108 | 1 521 496 | 1 569 037 | 1 577 242 |
|                                      | % of GDP       | 65.6      | 67.8      | 67.6      | 65.1      |
| <b>Estonia</b>                       |                |           |           |           |           |
| GDP mp                               | (million EEK)  | 151 012   | 173 530   | 205 038   | 238 929   |
| Government deficit (-) / surplus (+) | (million EEK)  | 2 498     | 2 587     | 5 977     | 6 448     |
|                                      | % of GDP       | 1.7       | 1.5       | 2.9       | 2.7       |
| Government expenditure               | % of GDP       | 34.1      | 34.0      | 34.2      | 35.5      |
| Government revenue                   | % of GDP       | 35.7      | 35.5      | 37.1      | 38.2      |
| Government debt                      | (million EEK)  | 7 615     | 7 845     | 8 727     | 8 334     |
|                                      | % of GDP       | 5.0       | 4.5       | 4.3       | 3.5       |
| <b>Ireland</b>                       |                |           |           |           |           |
| GDP mp                               | (million euro) | 148 975   | 162 168   | 177 286   | 190 603   |
| Government deficit (-) / surplus (+) | (million euro) | 2 079     | 2 738     | 5 326     | 444       |
|                                      | % of GDP       | 1.4       | 1.7       | 3.0       | 0.2       |
| Government expenditure               | % of GDP       | 33.7      | 33.7      | 33.8      | 35.4      |
| Government revenue                   | % of GDP       | 35.1      | 35.4      | 36.8      | 35.7      |
| Government debt                      | (million euro) | 43 856    | 44 230    | 43 787    | 47 239    |
|                                      | % of GDP       | 29.4      | 27.3      | 24.7      | 24.8      |

**GDP, government deficit/surplus and debt in the EU (in national currencies)**

|                                      |                | 2004      | 2005      | 2006      | 2007      |
|--------------------------------------|----------------|-----------|-----------|-----------|-----------|
| <b>Greece</b>                        |                |           |           |           |           |
| GDP mp                               | (million euro) | 185 851   | 197 645   | 213 207   | 228 180   |
| Government deficit (-) / surplus (+) | (million euro) | -13 940   | -10 051   | -6 018    | -7 937    |
|                                      | % of GDP       | -7.5      | -5.1      | -2.8      | -3.5      |
| Government expenditure               | % of GDP       | 45.4      | 43.3      | 42.2      | 43.7      |
| Government revenue                   | % of GDP       | 38.0      | 38.1      | 39.1      | 40.0      |
| Government debt                      | (million euro) | 183 157   | 195 338   | 204 394   | 216 381   |
|                                      | % of GDP       | 98.6      | 98.8      | 95.9      | 94.8      |
| <b>Spain</b>                         |                |           |           |           |           |
| GDP mp                               | (million euro) | 841 042   | 908 792   | 982 303   | 1 050 595 |
| Government deficit (-) / surplus (+) | (million euro) | -2 862    | 8 759     | 19 847    | 23 259    |
|                                      | % of GDP       | -0.3      | 1.0       | 2.0       | 2.2       |
| Government expenditure               | % of GDP       | 38.9      | 38.4      | 38.5      | 38.8      |
| Government revenue                   | % of GDP       | 38.5      | 39.4      | 40.5      | 41.0      |
| Government debt                      | (million euro) | 388 374   | 390 948   | 389 193   | 379 951   |
|                                      | % of GDP       | 46.2      | 43.0      | 39.6      | 36.2      |
| <b>France</b>                        |                |           |           |           |           |
| GDP mp                               | (million euro) | 1 660 189 | 1 726 068 | 1 807 462 | 1 892 244 |
| Government deficit (-) / surplus (+) | (million euro) | -59 576   | -50 368   | -42 570   | -50 301   |
|                                      | % of GDP       | -3.6      | -2.9      | -2.4      | -2.7      |
| Government expenditure               | % of GDP       | 53.2      | 53.4      | 52.7      | 52.4      |
| Government revenue                   | % of GDP       | 49.6      | 50.4      | 50.3      | 49.7      |
| Government debt                      | (million euro) | 1 076 932 | 1 145 354 | 1 149 928 | 1 209 497 |
|                                      | % of GDP       | 64.9      | 66.4      | 63.6      | 63.9      |
| <b>Italy</b>                         |                |           |           |           |           |
| GDP mp                               | (million euro) | 1 391 530 | 1 428 375 | 1 479 981 | 1 535 540 |
| Government deficit (-) / surplus (+) | (million euro) | -48 572   | -61 799   | -49 982   | -24 094   |
|                                      | % of GDP       | -3.5      | -4.3      | -3.4      | -1.6      |
| Government expenditure               | % of GDP       | 47.7      | 48.2      | 48.8      | 48.2      |
| Government revenue                   | % of GDP       | 44.2      | 43.8      | 45.4      | 46.6      |
| Government debt                      | (million euro) | 1 444 604 | 1 512 779 | 1 582 009 | 1 598 971 |
|                                      | % of GDP       | 103.8     | 105.9     | 106.9     | 104.1     |
| <b>Cyprus</b>                        |                |           |           |           |           |
| GDP mp                               | (million euro) | 12 654    | 13 462    | 14 435    | 15 566    |
| Government deficit (-) / surplus (+) | (million euro) | -516      | -326      | -173      | 537       |
|                                      | % of GDP       | -4.1      | -2.4      | -1.2      | 3.5       |
| Government expenditure               | % of GDP       | 42.8      | 43.6      | 43.4      | 43.0      |
| Government revenue                   | % of GDP       | 38.7      | 41.2      | 42.2      | 46.5      |
| Government debt                      | (million euro) | 8 883     | 9 300     | 9 331     | 9 262     |
|                                      | % of GDP       | 70.2      | 69.1      | 64.6      | 59.5      |
| <b>Latvia</b>                        |                |           |           |           |           |
| GDP mp                               | (million LVL)  | 7 435     | 9 059     | 11 172    | 13 957    |
| Government deficit (-) / surplus (+) | (million LVL)  | -77       | -33       | -24       | 9         |
|                                      | % of GDP       | -1.0      | -0.4      | -0.2      | 0.1       |
| Government expenditure               | % of GDP       | 35.8      | 35.6      | 37.9      | 37.7      |
| Government revenue                   | % of GDP       | 34.7      | 35.2      | 37.7      | 37.7      |
| Government debt                      | (million LVL)  | 1 110     | 1 122     | 1 191     | 1 331     |
|                                      | % of GDP       | 14.9      | 12.4      | 10.7      | 9.5       |
| <b>Lithuania</b>                     |                |           |           |           |           |
| GDP mp                               | (million LTL)  | 62 698    | 72 060    | 82 793    | 98 139    |
| Government deficit (-) / surplus (+) | (million LTL)  | -964      | -362      | -371      | -1 210    |
|                                      | % of GDP       | -1.5      | -0.5      | -0.4      | -1.2      |
| Government expenditure               | % of GDP       | 33.3      | 33.3      | 33.6      | 35.2      |
| Government revenue                   | % of GDP       | 31.8      | 32.8      | 33.1      | 33.9      |
| Government debt                      | (million LTL)  | 12 155    | 13 276    | 14 939    | 16 698    |
|                                      | % of GDP       | 19.4      | 18.4      | 18.0      | 17.0      |

**GDP, government deficit/surplus and debt in the EU (in national currencies)**

|                                      |                | 2004       | 2005       | 2006       | 2007       |
|--------------------------------------|----------------|------------|------------|------------|------------|
| <b>Luxembourg</b>                    |                |            |            |            |            |
| GDP mp                               | (million euro) | 27 520     | 30 237     | 33 921     | 36 278     |
| Government deficit (-) / surplus (+) | (million euro) | -333       | -30        | 433        | 1 171      |
|                                      | % of GDP       | -1.2       | -0.1       | 1.3        | 3.2        |
| Government expenditure               | % of GDP       | 42.5       | 41.6       | 38.6       | 37.8       |
| Government revenue                   | % of GDP       | 41.3       | 41.5       | 39.9       | 41.0       |
| Government debt                      | (million euro) | 1 742      | 1 830      | 2 223      | 2 524      |
|                                      | % of GDP       | 6.3        | 6.1        | 6.6        | 7.0        |
| <b>Hungary</b>                       |                |            |            |            |            |
| GDP mp                               | (million HUF)  | 20 695 365 | 21 997 374 | 23 785 244 | 25 419 164 |
| Government deficit (-) / surplus (+) | (million HUF)  | -1 323 658 | -1 718 676 | -2 205 193 | -1 260 757 |
|                                      | % of GDP       | -6.4       | -7.8       | -9.3       | -5.0       |
| Government expenditure               | % of GDP       | 48.9       | 50.1       | 51.9       | 49.8       |
| Government revenue                   | % of GDP       | 42.6       | 42.3       | 42.6       | 44.9       |
| Government debt                      | (million HUF)  | 12 296 209 | 13 582 512 | 15 592 502 | 16 729 304 |
|                                      | % of GDP       | 59.4       | 61.7       | 65.6       | 65.8       |
| <b>Malta</b>                         |                |            |            |            |            |
| GDP mp                               | (million euro) | 4 509      | 4 800      | 5 095      | 5 415      |
| Government deficit (-) / surplus (+) | (million euro) | -213       | -135       | -117       | -96        |
|                                      | % of GDP       | -4.7       | -2.8       | -2.3       | -1.8       |
| Government expenditure               | % of GDP       | 45.4       | 44.7       | 43.6       | 42.4       |
| Government revenue                   | % of GDP       | 40.7       | 41.8       | 41.3       | 40.6       |
| Government debt                      | (million euro) | 3 249      | 3 355      | 3 253      | 3 370      |
|                                      | % of GDP       | 72.1       | 69.9       | 63.8       | 62.2       |
| <b>Netherlands</b>                   |                |            |            |            |            |
| GDP mp                               | (million euro) | 491 184    | 513 407    | 539 929    | 567 066    |
| Government deficit (-) / surplus (+) | (million euro) | -8 584     | -1 359     | 3 371      | 1 973      |
|                                      | % of GDP       | -1.7       | -0.3       | 0.6        | 0.3        |
| Government expenditure               | % of GDP       | 46.1       | 44.8       | 45.6       | 45.3       |
| Government revenue                   | % of GDP       | 44.3       | 44.5       | 46.2       | 45.6       |
| Government debt                      | (million euro) | 257 604    | 266 060    | 256 109    | 259 031    |
|                                      | % of GDP       | 52.4       | 51.8       | 47.4       | 45.7       |
| <b>Austria</b>                       |                |            |            |            |            |
| GDP mp                               | (million euro) | 232 782    | 244 453    | 257 294    | 270 837    |
| Government deficit (-) / surplus (+) | (million euro) | -10 232    | -3 661     | -3 950     | -1 122     |
|                                      | % of GDP       | -4.4       | -1.5       | -1.5       | -0.4       |
| Government expenditure               | % of GDP       | 54.0       | 49.8       | 49.4       | 48.4       |
| Government revenue                   | % of GDP       | 49.5       | 48.2       | 47.7       | 47.9       |
| Government debt                      | (million euro) | 150 729    | 155 753    | 159 484    | 161 110    |
|                                      | % of GDP       | 64.8       | 63.7       | 62.0       | 59.5       |
| <b>Poland</b>                        |                |            |            |            |            |
| GDP mp                               | (million PLN)  | 924 538    | 983 302    | 1 060 031  | 1 175 266  |
| Government deficit (-) / surplus (+) | (million PLN)  | -52 685    | -42 519    | -40 163    | -23 247    |
|                                      | % of GDP       | -5.7       | -4.3       | -3.8       | -2.0       |
| Government expenditure               | % of GDP       | 42.6       | 43.3       | 43.8       | 42.0       |
| Government revenue                   | % of GDP       | 36.9       | 39.0       | 40.0       | 40.0       |
| Government debt                      | (million PLN)  | 422 386    | 462 742    | 505 149    | 527 570    |
|                                      | % of GDP       | 45.7       | 47.1       | 47.7       | 44.9       |
| <b>Portugal</b>                      |                |            |            |            |            |
| GDP mp                               | (million euro) | 144 128    | 149 124    | 155 446    | 163 083    |
| Government deficit (-) / surplus (+) | (million euro) | -4 831     | -9 083     | -6 092     | -4 218     |
|                                      | % of GDP       | -3.4       | -6.1       | -3.9       | -2.6       |
| Government expenditure               | % of GDP       | 46.5       | 47.6       | 46.3       | 45.8       |
| Government revenue                   | % of GDP       | 43.1       | 41.6       | 42.3       | 43.2       |
| Government debt                      | (million euro) | 84 033     | 94 792     | 100 522    | 103 702    |
|                                      | % of GDP       | 58.3       | 63.6       | 64.7       | 63.6       |

**GDP, government deficit/surplus and debt in the EU (in national currencies)**

|                                                |                      | 2004             | 2005             | 2006             | 2007             |
|------------------------------------------------|----------------------|------------------|------------------|------------------|------------------|
| <b>Romania</b>                                 |                      |                  |                  |                  |                  |
| GDP mp                                         | (million RON)        | 246 469          | 288 176          | 344 651          | 404 709          |
| Government deficit (-) / surplus (+)           | (million RON)        | -3 015           | -3 544           | -7 646           | -10 466          |
|                                                | % of GDP             | -1.2             | -1.2             | -2.2             | -2.6             |
| Government expenditure                         | % of GDP             | 33.6             | 33.5             | 35.3             | 37.3             |
| Government revenue                             | % of GDP             | 32.4             | 32.3             | 33.1             | 34.7             |
| Government debt                                | (million RON)        | 46 357           | 45 626           | 42 583           | 52 292           |
|                                                | % of GDP             | 18.8             | 15.8             | 12.4             | 12.9             |
| <b>Slovenia</b>                                |                      |                  |                  |                  |                  |
| GDP mp                                         | (million euro)       | 27 073           | 28 704           | 31 008           | 34 471           |
| Government deficit (-) / surplus (+)           | (million euro)       | -601             | -412             | -377             | 177              |
|                                                | % of GDP             | -2.2             | -1.4             | -1.2             | 0.5              |
| Government expenditure                         | % of GDP             | 45.8             | 45.3             | 44.5             | 42.4             |
| Government revenue                             | % of GDP             | 43.6             | 43.8             | 43.3             | 42.9             |
| Government debt                                | (million euro)       | 7 356            | 7 755            | 8 289            | 8 071            |
|                                                | % of GDP             | 27.2             | 27.0             | 26.7             | 23.4             |
| <b>Slovakia</b>                                |                      |                  |                  |                  |                  |
| GDP mp                                         | (million SKK)        | 1 362 042        | 1 485 671        | 1 659 398        | 1 852 781        |
| Government deficit (-) / surplus (+)           | (million SKK)        | -31 560          | -41 628          | -58 602          | -36 110          |
|                                                | % of GDP             | -2.3             | -2.8             | -3.5             | -1.9             |
| Government expenditure                         | % of GDP             | 37.7             | 38.1             | 37.1             | 34.6             |
| Government revenue                             | % of GDP             | 35.4             | 35.3             | 33.5             | 32.7             |
| Government debt                                | (million SKK)        | 564 151          | 507 525          | 505 199          | 543 851          |
|                                                | % of GDP             | 41.4             | 34.2             | 30.4             | 29.4             |
| <b>Finland</b>                                 |                      |                  |                  |                  |                  |
| GDP mp                                         | (million euro)       | 152 345          | 157 335          | 167 041          | 179 734          |
| Government deficit (-) / surplus (+)           | (million euro)       | 3 625            | 4 501            | 6 875            | 9 583            |
|                                                | % of GDP             | 2.4              | 2.9              | 4.1              | 5.3              |
| Government expenditure                         | % of GDP             | 50.2             | 50.4             | 48.9             | 47.3             |
| Government revenue                             | % of GDP             | 52.4             | 53.1             | 52.9             | 52.6             |
| Government debt                                | (million euro)       | 67 242           | 65 053           | 65 536           | 63 148           |
|                                                | % of GDP             | 44.1             | 41.3             | 39.2             | 35.1             |
| <b>Sweden</b>                                  |                      |                  |                  |                  |                  |
| GDP mp                                         | (million SEK)        | 2 624 964        | 2 735 218        | 2 899 653        | 3 070 591        |
| Government deficit (-) / surplus (+)           | (million SEK)        | 20 562           | 64 912           | 66 961           | 109 376          |
|                                                | % of GDP             | 0.8              | 2.4              | 2.3              | 3.6              |
| Government expenditure                         | % of GDP             | 55.6             | 55.2             | 54.3             | 52.7             |
| Government revenue                             | % of GDP             | 56.1             | 57.3             | 56.5             | 56.2             |
| Government debt                                | (million SEK)        | 1 344 621        | 1 392 833        | 1 330 762        | 1 241 624        |
|                                                | % of GDP             | 51.2             | 50.9             | 45.9             | 40.4             |
| <b>United Kingdom*</b>                         |                      |                  |                  |                  |                  |
| GDP mp                                         | (million GBP)        | 1 200 595        | 1 252 505        | 1 321 860        | 1 401 042        |
| Government deficit (-) / surplus (+)           | (million GBP)        | -41 103          | -42 645          | -35 304          | -38 930          |
|                                                | % of GDP             | -3.4             | -3.4             | -2.7             | -2.8             |
| Government expenditure                         | % of GDP             | 42.9             | 44.1             | 44.2             | 44.4             |
| Government revenue                             | % of GDP             | 39.6             | 40.8             | 41.6             | 41.7             |
| Government debt                                | (million GBP)        | 487 860          | 529 367          | 573 341          | 618 775          |
|                                                | % of GDP             | 40.6             | 42.3             | 43.4             | 44.2             |
| <i>Financial year (fy)</i>                     |                      | <b>2004/2005</b> | <b>2005/2006</b> | <b>2006/2007</b> | <b>2007/2008</b> |
| <i>GDP mp fy</i>                               | <i>(million GBP)</i> | <i>1 211 978</i> | <i>1 268 395</i> | <i>1 344 308</i> | <i>1 420 607</i> |
| <i>Government deficit (-) / surplus (+) fy</i> | <i>(million GBP)</i> | <i>-42 971</i>   | <i>-39 582</i>   | <i>-35 451</i>   | <i>-39 781</i>   |
|                                                | <i>% of GDP</i>      | <i>-3.5</i>      | <i>-3.1</i>      | <i>-2.6</i>      | <i>-2.8</i>      |
| <i>Government debt fy</i>                      | <i>(million GBP)</i> | <i>483 806</i>   | <i>531 482</i>   | <i>574 236</i>   | <i>614 360</i>   |
|                                                | <i>% of GDP</i>      | <i>39.9</i>      | <i>41.9</i>      | <i>42.7</i>      | <i>43.2</i>      |

\* Data refer to calendar years. Data referring to the financial year (1 April to 31 March), are shown in italics. For the United Kingdom, the relevant data for implementation of the excessive deficit procedure are financial year data.

## Annex I

### Main revisions between the April 2008 and October 2008 notifications

Below are shown country specific explanations for the largest revisions in deficit and debt for 2004-2007 between the April 2008 and October 2008 notifications, as well as in GDP and in deficit and debt ratios (see table below).

#### Deficit

**Belgium:** The revision of the surplus to a deficit for 2004 and the increase in the deficit for 2005 and 2007 are mainly due to the reclassification of capital injections as capital transfers.

**Bulgaria:** The decrease in the surplus for 2007 is due to new information on a debt cancellation towards Iraq.

**Czech Republic:** The decrease in the deficit for 2007 is mainly due to updated data for acquisition of non-financial assets and tax revenues.

**Germany:** The slight revision of the surplus to a deficit for 2007 is related to a call on a government guarantee in connection with IKB (Deutsche Industriebank AG).

**Estonia:** The decrease in the surplus for 2005 to 2007 is due to the reclassification of foundations and public companies into general government and the reclassification of equity injections to capital transfers. In 2005 and 2007 this is partly off-set by an increase in the surplus due to a change in data sources.

**Greece:** The increase in the deficit for 2006 and 2007 is due to updated data for taxes, hospitals, social security, changes in the balance of Treasury Accounts at the Central Bank, changes in the recording of the transactions with the EU budget and improved coverage of extra-budgetary bodies.

**Spain:** The increase in the surplus for 2006 is mainly due to updated data.

**Italy:** The slight increase in the deficit for 2004 to 2006 and the reduction in the deficit in 2007 are due to the reclassification of the Equitalia group inside general government, as well as to adjustments for interest and for the consolidation of flows between subsectors.

**Cyprus:** The increase in the surplus for 2007 is due to updated data.

**Luxembourg:** The increase in the surplus for 2007 is due to updated data.

**Hungary:** The decrease in the deficit for 2007 is due to updated data and adjustment in the time of recording of various transactions.

**Malta:** The decrease in the deficit for 2006 is due to a change in the method of recording of taxes to time-adjusted cash.

**Austria:** The increase in the deficit for 2004 is due to a reclassification of a capital injection into the Austrian railways as a capital transfer.

**Slovenia:** The revision of the deficit to a surplus for 2007 is mainly due to updated data.

**Slovakia:** The decrease in the deficit for 2007 is due to a change in the time of recording from 2007 to 1999 of a debt cancellation undertaken by Slovakia towards the Czech Republic, and to updated information on accrued taxes.

#### Debt

**Italy:** The increase in the debt in 2006 is due to the sector reclassification of the Equitalia group inside general government and to other methodological adjustments relating to off market swaps.

**Netherlands:** The increase in the debt for 2007 is due to the reclassification of short term loans previously recorded under other financial liabilities.

#### GDP

The GDP notified in October 2008 for EDP purposes was revised by a number of Member States compared to that notified in April 2008, most notably by **Slovenia** and **Ireland** (on average for amounts above 1% of GDP over the years 2004-2007). Changes in GDP affect deficit and debt ratios due to the denominator effect.

**Revisions in government deficit/surplus and government debt ratios**  
from the April 2008 to the October 2008 notification

|                |                                              | Deficit/surplus* |      |      |      | Debt |      |      |      |
|----------------|----------------------------------------------|------------------|------|------|------|------|------|------|------|
|                |                                              | 2004             | 2005 | 2006 | 2007 | 2004 | 2005 | 2006 | 2007 |
| Belgium        | Revision in deficit/surplus and debt ratios  | -0.2             | -0.3 | 0.0  | -0.1 | 0.1  | 0.0  | -0.4 | -1.0 |
|                | - due to revision of deficit/surplus or debt | -0.2             | -0.3 | 0.0  | -0.1 | 0.1  | 0.1  | 0.1  | 0.1  |
|                | - due to revision of GDP                     | 0.0              | 0.0  | 0.0  | 0.0  | 0.0  | -0.1 | -0.5 | -1.1 |
| Bulgaria       | Revision in deficit/surplus and debt ratios  | 0.2              | 0.1  | 0.0  | -3.3 | 0.0  | 0.0  | 0.0  | 0.0  |
|                | - due to revision of deficit/surplus or debt | 0.1              | 0.1  | 0.0  | -3.3 | 0.0  | 0.0  | 0.0  | 0.0  |
|                | - due to revision of GDP                     | 0.1              | 0.0  | 0.0  | 0.0  | 0.0  | 0.0  | 0.0  | 0.0  |
| Czech Republic | Revision in deficit/surplus and debt ratios  | 0.0              | 0.0  | 0.0  | 0.6  | 0.0  | 0.1  | 0.2  | 0.2  |
|                | - due to revision of deficit/surplus or debt | 0.0              | 0.0  | 0.0  | 0.6  | 0.0  | 0.0  | 0.0  | 0.0  |
|                | - due to revision of GDP                     | 0.0              | 0.0  | 0.0  | 0.0  | 0.0  | 0.1  | 0.2  | 0.2  |
| Denmark        | Revision in deficit/surplus and debt ratios  | 0.1              | 0.2  | 0.3  | 0.5  | 0.0  | 0.0  | 0.1  | 0.2  |
|                | - due to revision of deficit/surplus or debt | 0.1              | 0.2  | 0.2  | 0.5  | 0.0  | 0.0  | 0.1  | 0.2  |
|                | - due to revision of GDP                     | 0.0              | 0.0  | 0.1  | 0.0  | 0.0  | 0.0  | 0.0  | 0.0  |
| Germany        | Revision in deficit/surplus and debt ratios  | 0.0              | 0.1  | 0.1  | -0.2 | 0.0  | 0.0  | 0.0  | 0.1  |
|                | - due to revision of deficit/surplus or debt | 0.0              | 0.1  | 0.1  | -0.2 | 0.0  | 0.0  | 0.0  | 0.0  |
|                | - due to revision of GDP                     | 0.0              | 0.0  | 0.0  | 0.0  | 0.0  | 0.0  | 0.0  | 0.1  |
| Estonia        | Revision in deficit/surplus and debt ratios  | 0.1              | -0.3 | -0.5 | -0.1 | -0.1 | 0.0  | 0.1  | 0.1  |
|                | - due to revision of deficit/surplus or debt | 0.1              | -0.3 | -0.5 | -0.2 | -0.1 | -0.1 | 0.0  | 0.0  |
|                | - due to revision of GDP                     | 0.0              | 0.0  | 0.0  | 0.1  | 0.0  | 0.1  | 0.1  | 0.1  |
| Ireland        | Revision in deficit/surplus and debt ratios  | 0.0              | 0.1  | 0.0  | -0.1 | -0.1 | -0.1 | -0.4 | -0.6 |
|                | - due to revision of deficit/surplus or debt | 0.0              | 0.1  | 0.1  | -0.1 | 0.0  | 0.0  | 0.0  | 0.0  |
|                | - due to revision of GDP                     | 0.0              | 0.0  | -0.1 | 0.0  | -0.1 | -0.1 | -0.4 | -0.6 |
| Greece         | Revision in deficit/surplus and debt ratios  | -0.1             | 0.0  | -0.2 | -0.7 | 0.0  | 0.8  | 0.6  | 0.3  |
|                | - due to revision of deficit/surplus or debt | -0.1             | 0.1  | -0.2 | -0.6 | 0.2  | 0.3  | 0.2  | 0.0  |
|                | - due to revision of GDP                     | 0.0              | -0.1 | 0.0  | -0.1 | -0.2 | 0.5  | 0.4  | 0.3  |
| Spain          | Revision in deficit/surplus and debt ratios  | 0.0              | 0.0  | 0.2  | 0.0  | 0.0  | 0.0  | -0.1 | 0.0  |
|                | - due to revision of deficit/surplus or debt | 0.0              | 0.0  | 0.2  | 0.0  | 0.0  | 0.0  | 0.0  | 0.0  |
|                | - due to revision of GDP                     | 0.0              | 0.0  | 0.0  | 0.0  | 0.0  | 0.0  | -0.1 | 0.0  |
| France         | Revision in deficit/surplus and debt ratios  | 0.0              | 0.0  | 0.0  | 0.0  | 0.0  | 0.0  | 0.0  | -0.3 |
|                | - due to revision of deficit/surplus or debt | 0.0              | 0.0  | 0.0  | 0.0  | 0.0  | 0.0  | 0.0  | 0.0  |
|                | - due to revision of GDP                     | 0.0              | 0.0  | 0.0  | 0.0  | 0.0  | 0.0  | 0.0  | -0.3 |
| Italy          | Revision in deficit/surplus and debt ratios  | 0.0              | -0.1 | 0.0  | 0.3  | 0.0  | 0.1  | 0.4  | 0.1  |
|                | - due to revision of deficit/surplus or debt | 0.0              | -0.1 | 0.0  | 0.3  | 0.0  | 0.1  | 0.4  | 0.1  |
|                | - due to revision of GDP                     | 0.0              | 0.0  | 0.0  | 0.0  | 0.0  | 0.0  | 0.0  | 0.0  |
| Cyprus         | Revision in deficit/surplus and debt ratios  | 0.0              | 0.0  | 0.0  | 0.2  | 0.0  | 0.0  | -0.2 | -0.3 |
|                | - due to revision of deficit/surplus or debt | 0.0              | 0.0  | 0.0  | 0.2  | 0.0  | 0.0  | 0.0  | 0.0  |
|                | - due to revision of GDP                     | 0.0              | 0.0  | 0.0  | 0.0  | 0.0  | 0.0  | -0.2 | -0.3 |
| Latvia         | Revision in deficit/surplus and debt ratios  | 0.0              | 0.0  | 0.0  | 0.1  | 0.0  | 0.0  | 0.0  | -0.2 |
|                | - due to revision of deficit/surplus or debt | 0.0              | 0.0  | 0.0  | 0.1  | 0.0  | 0.0  | 0.0  | -0.2 |
|                | - due to revision of GDP                     | 0.0              | 0.0  | 0.0  | 0.0  | 0.0  | 0.0  | 0.0  | 0.0  |
| Lithuania      | Revision in deficit/surplus and debt ratios  | 0.0              | 0.0  | 0.1  | 0.0  | 0.0  | -0.2 | -0.2 | -0.3 |
|                | - due to revision of deficit/surplus or debt | 0.0              | 0.0  | 0.0  | 0.0  | 0.0  | 0.0  | 0.0  | 0.0  |
|                | - due to revision of GDP                     | 0.0              | 0.0  | 0.1  | 0.0  | 0.0  | -0.2 | -0.2 | -0.3 |
| Luxembourg     | Revision in deficit/surplus and debt ratios  | 0.0              | 0.0  | 0.0  | 0.3  | 0.0  | 0.0  | 0.0  | 0.2  |
|                | - due to revision of deficit/surplus or debt | 0.0              | 0.0  | 0.0  | 0.3  | 0.0  | 0.0  | 0.0  | 0.1  |
|                | - due to revision of GDP                     | 0.0              | 0.0  | 0.0  | 0.0  | 0.0  | 0.0  | 0.0  | 0.1  |
| Hungary        | Revision in deficit/surplus and debt ratios  | 0.1              | 0.0  | -0.1 | 0.5  | 0.0  | 0.1  | 0.0  | -0.2 |
|                | - due to revision of deficit/surplus or debt | 0.1              | 0.0  | -0.1 | 0.5  | 0.0  | 0.0  | 0.0  | 0.0  |
|                | - due to revision of GDP                     | 0.0              | 0.0  | 0.0  | 0.0  | 0.0  | 0.1  | 0.0  | -0.2 |

\* Revisions to deficit/surplus ratios: a positive sign means an improved government balance relative to GDP, and a negative sign a worsening.

**Revisions in government deficit/surplus and government debt ratios**  
from the April 2008 to the October 2008 notification

|                |                                              | Deficit/surplus* |      |      |      | Debt |      |      |      |
|----------------|----------------------------------------------|------------------|------|------|------|------|------|------|------|
|                |                                              | 2004             | 2005 | 2006 | 2007 | 2004 | 2005 | 2006 | 2007 |
| Malta          | Revision in deficit/surplus and debt ratios  | -0.1             | 0.2  | 0.3  | 0.0  | -0.5 | -0.5 | -0.4 | -0.4 |
|                | - due to revision of deficit/surplus or debt | -0.1             | 0.1  | 0.2  | 0.0  | 0.0  | 0.0  | 0.0  | 0.0  |
|                | - due to revision of GDP                     | 0.0              | 0.1  | 0.1  | 0.0  | -0.5 | -0.5 | -0.4 | -0.4 |
| Netherlands    | Revision in deficit/surplus and debt ratios  | 0.0              | 0.0  | 0.1  | -0.1 | 0.0  | -0.5 | -0.5 | 0.3  |
|                | - due to revision of deficit/surplus or debt | 0.0              | 0.0  | 0.1  | 0.0  | 0.0  | 0.0  | 0.1  | 0.9  |
|                | - due to revision of GDP                     | 0.0              | 0.0  | 0.0  | -0.1 | 0.0  | -0.5 | -0.6 | -0.6 |
| Austria        | Revision in deficit/surplus and debt ratios  | -0.7             | 0.0  | 0.0  | 0.1  | 1.0  | 0.2  | 0.2  | 0.4  |
|                | - due to revision of deficit/surplus or debt | -0.6             | 0.0  | 0.0  | 0.1  | 0.0  | 0.0  | 0.0  | -0.1 |
|                | - due to revision of GDP                     | -0.1             | 0.0  | 0.0  | 0.0  | 1.0  | 0.2  | 0.2  | 0.5  |
| Poland         | Revision in deficit/surplus and debt ratios  | 0.0              | 0.0  | 0.0  | 0.0  | 0.0  | 0.0  | 0.1  | -0.3 |
|                | - due to revision of deficit/surplus or debt | 0.0              | 0.0  | 0.0  | 0.0  | 0.0  | 0.0  | 0.0  | 0.0  |
|                | - due to revision of GDP                     | 0.0              | 0.0  | 0.0  | 0.0  | 0.0  | 0.0  | 0.1  | -0.3 |
| Portugal       | Revision in deficit/surplus and debt ratios  | 0.0              | 0.0  | 0.0  | 0.0  | 0.0  | 0.0  | 0.0  | 0.0  |
|                | - due to revision of deficit/surplus or debt | 0.0              | 0.0  | 0.0  | 0.0  | 0.0  | 0.0  | 0.0  | 0.1  |
|                | - due to revision of GDP                     | 0.0              | 0.0  | 0.0  | 0.0  | 0.0  | 0.0  | 0.0  | -0.1 |
| Romania        | Revision in deficit/surplus and debt ratios  | 0.0              | 0.0  | 0.0  | -0.1 | 0.0  | 0.0  | 0.0  | -0.1 |
|                | - due to revision of deficit/surplus or debt | 0.0              | 0.0  | 0.0  | -0.1 | 0.0  | 0.0  | 0.0  | 0.0  |
|                | - due to revision of GDP                     | 0.0              | 0.0  | 0.0  | 0.0  | 0.0  | 0.0  | 0.0  | -0.1 |
| Slovenia       | Revision in deficit/surplus and debt ratios  | 0.1              | 0.1  | 0.0  | 0.6  | -0.4 | -0.5 | -0.5 | -0.7 |
|                | - due to revision of deficit/surplus or debt | 0.0              | 0.0  | 0.0  | 0.6  | 0.0  | 0.0  | 0.0  | 0.0  |
|                | - due to revision of GDP                     | 0.1              | 0.1  | 0.0  | 0.0  | -0.4 | -0.5 | -0.5 | -0.7 |
| Slovakia       | Revision in deficit/surplus and debt ratios  | 0.1              | 0.0  | 0.1  | 0.3  | 0.0  | 0.0  | 0.0  | 0.0  |
|                | - due to revision of deficit/surplus or debt | 0.0              | 0.0  | 0.1  | 0.2  | 0.0  | 0.0  | 0.0  | 0.0  |
|                | - due to revision of GDP                     | 0.1              | 0.0  | 0.0  | 0.1  | 0.0  | 0.0  | 0.0  | 0.0  |
| Finland        | Revision in deficit/surplus and debt ratios  | 0.0              | 0.0  | 0.0  | 0.0  | 0.0  | 0.0  | 0.0  | -0.3 |
|                | - due to revision of deficit/surplus or debt | 0.0              | 0.0  | 0.0  | 0.0  | 0.0  | 0.0  | 0.0  | 0.0  |
|                | - due to revision of GDP                     | 0.0              | 0.0  | 0.0  | 0.0  | 0.0  | 0.0  | 0.0  | -0.3 |
| Sweden         | Revision in deficit/surplus and debt ratios  | 0.0              | 0.2  | 0.0  | 0.1  | 0.0  | 0.0  | 0.0  | -0.2 |
|                | - due to revision of deficit/surplus or debt | 0.0              | 0.1  | 0.0  | 0.1  | 0.0  | 0.0  | 0.0  | -0.2 |
|                | - due to revision of GDP                     | 0.0              | 0.1  | 0.0  | 0.0  | 0.0  | 0.0  | 0.0  | 0.0  |
| United Kingdom | Revision in deficit/surplus and debt ratios  | 0.0              | 0.0  | -0.1 | 0.1  | 0.2  | 0.2  | 0.3  | 0.4  |
|                | - due to revision of deficit/surplus or debt | 0.0              | 0.0  | -0.1 | 0.1  | 0.0  | 0.0  | 0.0  | 0.0  |
|                | - due to revision of GDP                     | 0.0              | 0.0  | 0.0  | 0.0  | 0.2  | 0.2  | 0.3  | 0.4  |

\* Revisions to deficit/surplus ratios: a positive sign means an improved government balance relative to GDP, and a negative sign a worsening.
