# Supplementary material
Source: publisher figshare collection journal article supplement (https://tandf.figshare.com/articles/dataset/_/4793563)
Supplement: Supplementary file 4 [file 1]

Provision of deficit and debt data for 2009 - Second notification

## **Euro area and EU27 government deficit at 6.3% and 6.8% of GDP respectively**

**Government debt at 79.2% and 74.0%**

*Eurostat publishes today government deficit and debt figures for Greece as well as the euro area and EU27 aggregates. The data for all other Member States are unchanged compared with those issued in News Release 157/2010 of 22 October 2010.*

In 2009, the government deficit<sup>1</sup> and government debt<sup>1</sup> of both the **euro area**<sup>2</sup> (EA16) and the **EU27** increased compared with 2008, while GDP fell. In the **euro area** the government deficit to GDP ratio increased from 2.0% in 2008<sup>3</sup> to 6.3% in 2009, and in the **EU27** from 2.3% to 6.8%. In the **euro area** the government debt to GDP ratio increased from 69.8% at the end of 2008 to 79.2% at the end of 2009, and in the **EU27** from 61.8% to 74.0%.

|                                      |                | 2006       | 2007       | 2008       | 2009       |
|--------------------------------------|----------------|------------|------------|------------|------------|
| <b>Euro area (EA16)</b>              |                |            |            |            |            |
| GDP market prices (mp)               | (million euro) | 8 561 831  | 9 019 608  | 9 248 228  | 8 957 736  |
| Government deficit (-) / surplus (+) | (million euro) | -116 763   | -58 519    | -186 010   | -563 419   |
|                                      | (% of GDP)     | -1.4       | -0.6       | -2.0       | -6.3       |
| Government expenditure               | (% of GDP)     | 46.7       | 46.0       | 46.9       | 50.8       |
| Government revenue                   | (% of GDP)     | 45.3       | 45.3       | 44.9       | 44.5       |
| Government debt                      | (million euro) | 5 865 245  | 5 967 265  | 6 452 348  | 7 092 408  |
|                                      | (% of GDP)     | 68.5       | 66.2       | 69.8       | 79.2       |
| <b>EU27</b>                          |                |            |            |            |            |
| GDP mp                               | (million euro) | 11 700 493 | 12 397 513 | 12 494 932 | 11 787 182 |
| Government deficit (-) / surplus (+) | (million euro) | -173 319   | -106 248   | -292 783   | -800 430   |
|                                      | (% of GDP)     | -1.5       | -0.9       | -2.3       | -6.8       |
| Government expenditure               | (% of GDP)     | 46.3       | 45.6       | 46.9       | 50.8       |
| Government revenue                   | (% of GDP)     | 44.8       | 44.7       | 44.6       | 44.0       |
| Government debt                      | (million euro) | 7 194 795  | 7 292 373  | 7 726 636  | 8 720 027  |
|                                      | (% of GDP)     | 61.5       | 58.8       | 61.8       | 74.0       |

In 2009 the largest government deficits in percentage of GDP were recorded in **Greece** (-15.4%), **Ireland** (-14.4%), the **United Kingdom** (-11.4%), **Spain** (-11.1%), **Latvia** (-10.2%), **Portugal** (-9.3%), **Lithuania** (-9.2%), **Romania** (-8.6%), **Slovakia** (-7.9%), **France** (-7.5%) and **Poland** (-7.2%). No Member State registered a government surplus in 2009. The lowest deficits were recorded in **Luxembourg** (-0.7%), **Sweden** (-0.9%) and **Estonia** (-1.7%). In all, 25 Member States recorded a worsening in their government deficit relative to GDP in 2009 compared with 2008, and two (**Estonia** and **Malta**) an improvement.

At the end of 2009, the lowest ratios of government debt to GDP were recorded in **Estonia** (7.2%), **Luxembourg** (14.5%), **Bulgaria** (14.7%), **Romania** (23.9%) and **Lithuania** (29.5%). Twelve Member States had government debt ratios higher than 60% of GDP in 2009: **Greece** (126.8%), **Italy** (116.0%), **Belgium** (96.2%), **Hungary** (78.4%), **France** (78.1%), **Portugal** (76.1%), **Germany** (73.4%), **Malta** (68.6%), the **United Kingdom** (68.2%), **Austria** (67.5%), **Ireland** (65.5%) and the **Netherlands** (60.8%).

In 2009, government expenditure<sup>4</sup> in the **euro area** was equivalent to 50.8% of GDP and government revenue<sup>4</sup> to 44.5%. The figures for the **EU27** were 50.8% and 44.0% respectively. In both zones, the government expenditure ratio increased between 2008 and 2009, while the government revenue ratio decreased.

### Reservations on reported data<sup>5</sup>

**Greece:** Eurostat is lifting the reservation on Greek data expressed in its [News Release 55/2010 of 22 April 2010](#). Eurostat and the Hellenic Statistical Authority have addressed all of the issues identified in the last reservation during a series of EDP methodological visits. For further information, see "Information note on Greek fiscal data" on the government finance statistics section on the Eurostat website:

[http://epp.eurostat.ec.europa.eu/portal/page/portal/government\\_finance\\_statistics/introduction](http://epp.eurostat.ec.europa.eu/portal/page/portal/government_finance_statistics/introduction)

### Amendment by Eurostat to reported data<sup>6</sup>

**United Kingdom:** Eurostat has amended the deficit data notified by the United Kingdom for the years 2006 to 2009 for consistency of recording of UMTS licences proceeds in 2000. This leads to an increase in the government deficit in 2007 and 2008 (as well as for financial years 2007/2008 and 2008/2009) by 1.044 mn GBP (0.1% of GDP) and in 2006 and 2009 (financial years 2006/2007 and 2009/2010) by 1.045 mn GBP (0.1% of GDP). There is no change in the reported debt figures.

### Other issues

#### Publication of supplementary tables for the financial crisis

Eurostat publishes supplementary tables for the financial crisis on its website:

[http://epp.eurostat.ec.europa.eu/portal/page/portal/government\\_finance\\_statistics/excessive\\_deficit/supplementary\\_tables\\_financial\\_turmoil](http://epp.eurostat.ec.europa.eu/portal/page/portal/government_finance_statistics/excessive_deficit/supplementary_tables_financial_turmoil).

These tables contain data on the "net revenue/cost for general government (impact on ESA95 government deficit)" and "outstanding amounts of assets, actual liabilities and contingent liabilities of government" in relation to government interventions in the context of the financial crisis for the years 2007 to 2009. See also the Eurostat decision on the statistical recording of public interventions to support financial institutions and financial markets during the financial crisis (Eurostat News Release 103/2009 of 15 July 2009).

### Background

In this News Release, **Eurostat, the statistical office of the European Union**, is providing<sup>7</sup> government deficit and debt data based on figures reported in the **second 2010 notification** by EU Member States for the years 2006-2009, for the application of the excessive deficit procedure (EDP). This notification is based on the ESA95 system of national accounts. This News Release also includes data on government expenditure and revenue and an annex with the main revisions since the April 2010 News Release.

Eurostat will also be releasing information on the underlying government sector accounts, as well as on the contribution of deficit/surplus and other relevant factors to the variation in the debt level (stock-flow adjustment), on the government finance statistics section on its website:

[http://epp.eurostat.ec.europa.eu/portal/page/portal/government\\_finance\\_statistics/introduction](http://epp.eurostat.ec.europa.eu/portal/page/portal/government_finance_statistics/introduction)

1. According to the Protocol on the excessive deficit procedure annexed to the EC Treaty, government deficit (surplus) means the net borrowing (net lending) of the whole general government sector (central government, state government, local government and social security funds). It is calculated according to national accounts concepts (European System of Accounts, ESA95). Government debt is the consolidated gross debt of the whole general government sector outstanding at the end of the year (at nominal value).
  - Table of euro area and EU27 aggregates: the data are in euro. For those countries not belonging to the euro area, the rate of conversion into euro is as follows:
    - for deficit / surplus and GDP data, the annual average exchange rate;
    - for the stock of government debt, the end of year exchange rate.
  - Table of national data: these are in national currencies. For Cyprus, Malta, Slovenia and Slovakia, data for the years prior to the adoption of the euro have been converted into euro according to the irrevocable conversion rate.
2. Euro area (EA16): Belgium, Germany, Greece, Spain, France, Ireland, Italy, Cyprus, Luxembourg, Malta, Netherlands, Austria, Portugal, Slovenia, Slovakia and Finland. In the attached table, the euro area is defined as including Cyprus, Malta, Slovenia and Slovakia for the full period, although Slovenia joined the euro area on 1 January 2007, Cyprus and Malta on 1 January 2008 and Slovakia on 1 January 2009.
3. In the first provision of data for the excessive deficit procedure, the 2009 government deficits for the EA16 and the EU27 were 6.3% and 6.8% of GDP respectively. The government debt of the EA16 was 78.7% of GDP and of the EU27 73.6% of GDP. See News Release 55/2010 of 22 April 2010.
4. Government expenditure and revenue are reported to Eurostat under the ESA95 transmission programme. They are the sum of non-financial transactions by general government, and include both current and capital transactions. For definitions, see Council Regulation No. 2223/96, as amended. It should be noted that the government balance (i.e. the difference between total government revenue and expenditure) is not exactly the same under ESA95 as that for the purpose of the

excessive deficit procedure. Regulation (EC) No 2558/2001 on the reclassification of settlements under swaps agreements and forward rate agreements implies that there are two relevant definitions of government deficit/surplus:

- The ESA95 definition of net lending /net borrowing does not include streams of payments and receipts resulting from swap agreements and forward rate agreements, as these are recorded as financial transactions;
- For the purpose of the excessive deficit procedure, streams of payments and receipts resulting from swaps and forward rate agreements are recorded as interest expenditure and contribute to the net lending/net borrowing of general government.

Concerning 2009, for most Member States, the difference, if any, between the two balances is minor except in **Sweden** (0.26% of GDP), **Finland** (0.25% of GDP) and **Denmark** (0.11% of GDP). These differences improve net lending/net borrowing for EDP purposes for all the mentioned countries.

5. The term "reservations" is defined in article 15 (1) of Council Regulation 479/2009, as amended. The Commission (Eurostat) expresses reservations when it has doubts on the quality of the reported data.
6. According to Article 15 (2) of Council Regulation 479/2009, as amended, the Commission (Eurostat) may amend actual data reported by Member States and provide the amended data and a justification of the amendment where there is evidence that actual data reported by Member States do not comply with the quality requirements (compliance with accounting rules, completeness, reliability, timeliness and consistency of statistical data).
7. According to Article 14 (1) of Council Regulation 479/2009, as amended, Eurostat provides the actual government deficit and debt data for the application of the Protocol on the excessive deficit procedure, within three weeks after the reporting deadlines. This provision of data shall be effected through publication.

*For further information on the methodology of statistics reported under the excessive deficit procedure, please see Council Regulation 479/2009, as amended by Council Regulation 679/2010 (consolidated version available at <http://eur-lex.europa.eu/LexUriServ/LexUriServ.do?uri=CONSLEG:2009R0479:20100819:EN:PDF>), Council Regulation 2223/96, as amended (consolidated version available at <http://eur-lex.europa.eu/LexUriServ/site/en/consleg/1996/R/01996R2223-20030807-en.pdf>) and the Eurostat publication "ESA95 manual on government deficit and debt", third edition, 2010, [http://epp.eurostat.ec.europa.eu/portal/page/portal/product\\_details/publication?p\\_product\\_code=KS-RA-09-017](http://epp.eurostat.ec.europa.eu/portal/page/portal/product_details/publication?p_product_code=KS-RA-09-017).*

Issued by:

**Eurostat Press Office**

**Tim ALLEN**

**Tel: +352-4301-33 444**

**[eurostat-pressoffice@ec.europa.eu](mailto:eurostat-pressoffice@ec.europa.eu)**

Eurostat news releases on internet:

**<http://ec.europa.eu/eurostat>**

Selected Principal European Economic Indicators:

**<http://ec.europa.eu/eurostat/euroindicators>**

**GDP, government deficit/surplus and debt in the EU (in national currencies)**

|                                      |                | 2006      | 2007      | 2008      | 2009      |
|--------------------------------------|----------------|-----------|-----------|-----------|-----------|
| <b>Belgium</b>                       |                |           |           |           |           |
| GDP mp                               | (million euro) | 318 150   | 335 085   | 345 006   | 339 162   |
| Government deficit (-) / surplus (+) | (million euro) | 573       | -1 105    | -4 622    | -20 351   |
|                                      | (% of GDP)     | 0.2       | -0.3      | -1.3      | -6.0      |
| Government expenditure               | (% of GDP)     | 48.6      | 48.4      | 50.2      | 54.2      |
| Government revenue                   | (% of GDP)     | 48.8      | 48.1      | 48.8      | 48.1      |
| Government debt                      | (million euro) | 280 413   | 282 106   | 309 128   | 326 255   |
|                                      | (% of GDP)     | 88.1      | 84.2      | 89.6      | 96.2      |
| <b>Bulgaria</b>                      |                |           |           |           |           |
| GDP mp                               | (million BGN)  | 51 783    | 60 185    | 69 295    | 68 537    |
| Government deficit (-) / surplus (+) | (million BGN)  | 961       | 683       | 1 149     | -3 211    |
|                                      | (% of GDP)     | 1.9       | 1.1       | 1.7       | -4.7      |
| Government expenditure               | (% of GDP)     | 34.4      | 39.7      | 37.6      | 40.6      |
| Government revenue                   | (% of GDP)     | 36.2      | 40.8      | 39.3      | 35.9      |
| Government debt                      | (million BGN)  | 11 189    | 10 374    | 9 497     | 10 057    |
|                                      | (% of GDP)     | 21.6      | 17.2      | 13.7      | 14.7      |
| <b>Czech Republic</b>                |                |           |           |           |           |
| GDP mp                               | (million CZK)  | 3 222 369 | 3 535 460 | 3 688 997 | 3 625 865 |
| Government deficit (-) / surplus (+) | (million CZK)  | -84 902   | -23 875   | -100 346  | -210 267  |
|                                      | (% of GDP)     | -2.6      | -0.7      | -2.7      | -5.8      |
| Government expenditure               | (% of GDP)     | 43.7      | 42.5      | 42.9      | 45.9      |
| Government revenue                   | (% of GDP)     | 41.1      | 41.8      | 40.2      | 40.2      |
| Government debt                      | (million CZK)  | 948 276   | 1 023 784 | 1 104 915 | 1 280 352 |
|                                      | (% of GDP)     | 29.4      | 29.0      | 30.0      | 35.3      |
| <b>Denmark</b>                       |                |           |           |           |           |
| GDP mp                               | (million DKK)  | 1 631 659 | 1 691 472 | 1 737 448 | 1 662 368 |
| Government deficit (-) / surplus (+) | (million DKK)  | 84 195    | 80 856    | 59 035    | -45 354   |
|                                      | (% of GDP)     | 5.2       | 4.8       | 3.4       | -2.7      |
| Government expenditure               | (% of GDP)     | 51.6      | 50.9      | 51.8      | 58.5      |
| Government revenue                   | (% of GDP)     | 56.6      | 55.7      | 55.3      | 55.7      |
| Government debt                      | (million DKK)  | 523 351   | 462 786   | 593 798   | 688 055   |
|                                      | (% of GDP)     | 32.1      | 27.4      | 34.2      | 41.4      |
| <b>Germany</b>                       |                |           |           |           |           |
| GDP mp                               | (million euro) | 2 326 500 | 2 432 400 | 2 481 200 | 2 397 100 |
| Government deficit (-) / surplus (+) | (million euro) | -36 830   | 6 550     | 2 820     | -72 910   |
|                                      | (% of GDP)     | -1.6      | 0.3       | 0.1       | -3.0      |
| Government expenditure               | (% of GDP)     | 45.3      | 43.6      | 43.8      | 47.5      |
| Government revenue                   | (% of GDP)     | 43.7      | 43.8      | 43.9      | 44.5      |
| Government debt                      | (million euro) | 1 571 636 | 1 578 687 | 1 643 805 | 1 760 530 |
|                                      | (% of GDP)     | 67.6      | 64.9      | 66.3      | 73.4      |
| <b>Estonia</b>                       |                |           |           |           |           |
| GDP mp                               | (million EEK)  | 209 520   | 247 646   | 252 015   | 216 875   |
| Government deficit (-) / surplus (+) | (million EEK)  | 5 128     | 6 293     | -7 146    | -3 753    |
|                                      | (% of GDP)     | 2.4       | 2.5       | -2.8      | -1.7      |
| Government expenditure               | (% of GDP)     | 33.6      | 34.4      | 39.9      | 45.2      |
| Government revenue                   | (% of GDP)     | 36.0      | 36.9      | 37.0      | 43.4      |
| Government debt                      | (million EEK)  | 9 242     | 9 266     | 11 600    | 15 511    |
|                                      | (% of GDP)     | 4.4       | 3.7       | 4.6       | 7.2       |
| <b>Ireland</b>                       |                |           |           |           |           |
| GDP mp                               | (million euro) | 177 343   | 189 374   | 179 989   | 159 645   |
| Government deficit (-) / surplus (+) | (million euro) | 5 198     | 47        | -13 149   | -22 958   |
|                                      | (% of GDP)     | 2.9       | 0.0       | -7.3      | -14.4     |
| Government expenditure               | (% of GDP)     | 34.4      | 36.8      | 42.7      | 48.9      |
| Government revenue                   | (% of GDP)     | 37.4      | 36.8      | 35.4      | 34.5      |
| Government debt                      | (million euro) | 44 003    | 47 349    | 79 815    | 104 592   |
|                                      | (% of GDP)     | 24.8      | 25.0      | 44.3      | 65.5      |

## GDP, government deficit/surplus and debt in the EU (in national currencies)

|                                      |                | 2006      | 2007      | 2008      | 2009      |
|--------------------------------------|----------------|-----------|-----------|-----------|-----------|
| <b>Greece</b>                        |                |           |           |           |           |
| GDP mp                               | (million euro) | 211 314   | 227 134   | 236 936   | 235 035   |
| Government deficit (-) / surplus (+) | (million euro) | -12 109   | -14 465   | -22 363   | -36 150   |
|                                      | (% of GDP)     | -5.7      | -6.4      | -9.4      | -15.4     |
| Government expenditure               | (% of GDP)     | 45.2      | 46.5      | 49.2      | 53.2      |
| Government revenue                   | (% of GDP)     | 39.1      | 39.8      | 39.7      | 37.8      |
| Government debt                      | (million euro) | 224 204   | 238 581   | 261 396   | 298 032   |
|                                      | (% of GDP)     | 106.1     | 105.0     | 110.3     | 126.8     |
| <b>Spain</b>                         |                |           |           |           |           |
| GDP mp                               | (million euro) | 984 284   | 1 053 537 | 1 088 124 | 1 053 914 |
| Government deficit (-) / surplus (+) | (million euro) | 19 847    | 20 066    | -45 189   | -117 306  |
|                                      | (% of GDP)     | 2.0       | 1.9       | -4.2      | -11.1     |
| Government expenditure               | (% of GDP)     | 38.4      | 39.2      | 41.3      | 45.8      |
| Government revenue                   | (% of GDP)     | 40.4      | 41.1      | 37.1      | 34.7      |
| Government debt                      | (million euro) | 389 507   | 380 660   | 432 978   | 560 587   |
|                                      | (% of GDP)     | 39.6      | 36.1      | 39.8      | 53.2      |
| <b>France</b>                        |                |           |           |           |           |
| GDP mp                               | (million euro) | 1 806 433 | 1 895 284 | 1 948 511 | 1 907 145 |
| Government deficit (-) / surplus (+) | (million euro) | -41 066   | -51 433   | -64 677   | -143 834  |
|                                      | (% of GDP)     | -2.3      | -2.7      | -3.3      | -7.5      |
| Government expenditure               | (% of GDP)     | 52.7      | 52.3      | 52.8      | 56.0      |
| Government revenue                   | (% of GDP)     | 50.4      | 49.6      | 49.5      | 48.4      |
| Government debt                      | (million euro) | 1 149 937 | 1 208 950 | 1 315 147 | 1 489 025 |
|                                      | (% of GDP)     | 63.7      | 63.8      | 67.5      | 78.1      |
| <b>Italy</b>                         |                |           |           |           |           |
| GDP mp                               | (million euro) | 1 485 377 | 1 546 177 | 1 567 851 | 1 520 870 |
| Government deficit (-) / surplus (+) | (million euro) | -49 921   | -23 517   | -42 694   | -80 863   |
|                                      | (% of GDP)     | -3.4      | -1.5      | -2.7      | -5.3      |
| Government expenditure               | (% of GDP)     | 48.7      | 47.9      | 48.8      | 51.9      |
| Government revenue                   | (% of GDP)     | 45.4      | 46.4      | 46.2      | 46.6      |
| Government debt                      | (million euro) | 1 584 093 | 1 602 069 | 1 666 461 | 1 763 559 |
|                                      | (% of GDP)     | 106.6     | 103.6     | 106.3     | 116.0     |
| <b>Cyprus</b>                        |                |           |           |           |           |
| GDP mp                               | (million euro) | 14 435    | 15 879    | 17 287    | 16 946    |
| Government deficit (-) / surplus (+) | (million euro) | -173      | 537       | 158       | -1 011    |
|                                      | (% of GDP)     | -1.2      | 3.4       | 0.9       | -6.0      |
| Government expenditure               | (% of GDP)     | 43.4      | 42.2      | 42.5      | 45.8      |
| Government revenue                   | (% of GDP)     | 42.2      | 45.5      | 43.4      | 39.8      |
| Government debt                      | (million euro) | 9 331     | 9 262     | 8 347     | 9 826     |
|                                      | (% of GDP)     | 64.6      | 58.3      | 48.3      | 58.0      |
| <b>Latvia</b>                        |                |           |           |           |           |
| GDP mp                               | (million LVL)  | 11 172    | 14 780    | 16 188    | 13 083    |
| Government deficit (-) / surplus (+) | (million LVL)  | -52       | -47       | -673      | -1 341    |
|                                      | (% of GDP)     | -0.5      | -0.3      | -4.2      | -10.2     |
| Government expenditure               | (% of GDP)     | 38.1      | 35.7      | 38.8      | 43.9      |
| Government revenue                   | (% of GDP)     | 37.7      | 35.4      | 34.6      | 33.7      |
| Government debt                      | (million LVL)  | 1 190     | 1 330     | 3 181     | 4 802     |
|                                      | (% of GDP)     | 10.7      | 9.0       | 19.7      | 36.7      |
| <b>Lithuania</b>                     |                |           |           |           |           |
| GDP mp                               | (million LTL)  | 82 793    | 98 669    | 111 483   | 91 526    |
| Government deficit (-) / surplus (+) | (million LTL)  | -371      | -1 001    | -3 664    | -8 402    |
|                                      | (% of GDP)     | -0.4      | -1.0      | -3.3      | -9.2      |
| Government expenditure               | (% of GDP)     | 33.6      | 34.8      | 37.4      | 43.6      |
| Government revenue                   | (% of GDP)     | 33.1      | 33.8      | 34.1      | 34.5      |
| Government debt                      | (million LTL)  | 14 939    | 16 698    | 17 375    | 26 983    |
|                                      | (% of GDP)     | 18.0      | 16.9      | 15.6      | 29.5      |

**GDP, government deficit/surplus and debt in the EU (in national currencies)**

|                                      |                | 2006       | 2007       | 2008       | 2009       |
|--------------------------------------|----------------|------------|------------|------------|------------|
| <b>Luxembourg</b>                    |                |            |            |            |            |
| GDP mp                               | (million euro) | 33 920     | 37 491     | 39 640     | 38 045     |
| Government deficit (-) / surplus (+) | (million euro) | 459        | 1 389      | 1 183      | -274       |
|                                      | (% of GDP)     | 1.4        | 3.7        | 3.0        | -0.7       |
| Government expenditure               | (% of GDP)     | 38.6       | 36.2       | 36.9       | 42.2       |
| Government revenue                   | (% of GDP)     | 39.9       | 39.9       | 39.9       | 41.5       |
| Government debt                      | (million euro) | 2 266      | 2 502      | 5 395      | 5 527      |
|                                      | (% of GDP)     | 6.7        | 6.7        | 13.6       | 14.5       |
| <b>Hungary</b>                       |                |            |            |            |            |
| GDP mp                               | (million HUF)  | 23 730 035 | 25 321 478 | 26 753 906 | 26 054 327 |
| Government deficit (-) / surplus (+) | (million HUF)  | -2 213 665 | -1 274 100 | -1 000 902 | -1 156 324 |
|                                      | (% of GDP)     | -9.3       | -5.0       | -3.7       | -4.4       |
| Government expenditure               | (% of GDP)     | 52.0       | 50.0       | 48.8       | 50.5       |
| Government revenue                   | (% of GDP)     | 42.6       | 45.0       | 45.1       | 46.1       |
| Government debt                      | (million HUF)  | 15 592 499 | 16 734 203 | 19 348 025 | 20 421 182 |
|                                      | (% of GDP)     | 65.7       | 66.1       | 72.3       | 78.4       |
| <b>Malta</b>                         |                |            |            |            |            |
| GDP mp                               | (million euro) | 5 131      | 5 480      | 5 744      | 5 750      |
| Government deficit (-) / surplus (+) | (million euro) | -141       | -125       | -274       | -217       |
|                                      | (% of GDP)     | -2.7       | -2.3       | -4.8       | -3.8       |
| Government expenditure               | (% of GDP)     | 43.8       | 42.4       | 44.8       | 43.9       |
| Government revenue                   | (% of GDP)     | 41.0       | 40.1       | 40.0       | 40.1       |
| Government debt                      | (million euro) | 3 254      | 3 379      | 3 627      | 3 947      |
|                                      | (% of GDP)     | 63.4       | 61.7       | 63.1       | 68.6       |
| <b>Netherlands</b>                   |                |            |            |            |            |
| GDP mp                               | (million euro) | 540 216    | 571 773    | 596 226    | 571 979    |
| Government deficit (-) / surplus (+) | (million euro) | 2 919      | 1 048      | 3 389      | -30 915    |
|                                      | (% of GDP)     | 0.5        | 0.2        | 0.6        | -5.4       |
| Government expenditure               | (% of GDP)     | 45.5       | 45.3       | 46.0       | 51.4       |
| Government revenue                   | (% of GDP)     | 46.1       | 45.4       | 46.6       | 46.0       |
| Government debt                      | (million euro) | 255 916    | 258 982    | 347 065    | 347 610    |
|                                      | (% of GDP)     | 47.4       | 45.3       | 58.2       | 60.8       |
| <b>Austria</b>                       |                |            |            |            |            |
| GDP mp                               | (million euro) | 256 951    | 272 010    | 283 085    | 274 320    |
| Government deficit (-) / surplus (+) | (million euro) | -3 855     | -1 160     | -1 328     | -9 607     |
|                                      | (% of GDP)     | -1.5       | -0.4       | -0.5       | -3.5       |
| Government expenditure               | (% of GDP)     | 49.4       | 48.5       | 48.8       | 52.3       |
| Government revenue                   | (% of GDP)     | 47.8       | 47.9       | 48.2       | 48.8       |
| Government debt                      | (million euro) | 159 450    | 161 247    | 176 805    | 185 075    |
|                                      | (% of GDP)     | 62.1       | 59.3       | 62.5       | 67.5       |
| <b>Poland</b>                        |                |            |            |            |            |
| GDP mp                               | (million PLN)  | 1 060 031  | 1 176 737  | 1 275 432  | 1 343 657  |
| Government deficit (-) / surplus (+) | (million PLN)  | -38 476    | -22 134    | -46 849    | -97 321    |
|                                      | (% of GDP)     | -3.6       | -1.9       | -3.7       | -7.2       |
| Government expenditure               | (% of GDP)     | 43.9       | 42.2       | 43.2       | 44.4       |
| Government revenue                   | (% of GDP)     | 40.2       | 40.3       | 39.5       | 37.2       |
| Government debt                      | (million PLN)  | 506 036    | 529 370    | 600 829    | 684 073    |
|                                      | (% of GDP)     | 47.7       | 45.0       | 47.1       | 50.9       |
| <b>Portugal</b>                      |                |            |            |            |            |
| GDP mp                               | (million euro) | 160 273    | 168 737    | 172 103    | 168 076    |
| Government deficit (-) / surplus (+) | (million euro) | -6 491     | -4 671     | -5 038     | -15 701    |
|                                      | (% of GDP)     | -4.1       | -2.8       | -2.9       | -9.3       |
| Government expenditure               | (% of GDP)     | 44.5       | 43.8       | 43.6       | 48.2       |
| Government revenue                   | (% of GDP)     | 40.5       | 40.9       | 40.6       | 38.8       |
| Government debt                      | (million euro) | 102 440    | 105 857    | 112 353    | 127 908    |
|                                      | (% of GDP)     | 63.9       | 62.7       | 65.3       | 76.1       |

## GDP, government deficit/surplus and debt in the EU (in national currencies)

|                                      |                | 2006             | 2007             | 2008             | 2009             |
|--------------------------------------|----------------|------------------|------------------|------------------|------------------|
| <b>Romania</b>                       |                |                  |                  |                  |                  |
| GDP mp                               | (million RON)  | 344 651          | 416 007          | 514 700          | 491 274          |
| Government deficit (-) / surplus (+) | (million RON)  | -7 710           | -10 787          | -29 529          | -42 384          |
|                                      | (% of GDP)     | -2.2             | -2.6             | -5.7             | -8.6             |
| Government expenditure               | (% of GDP)     | 35.5             | 36.2             | 38.2             | 41.0             |
| Government revenue                   | (% of GDP)     | 33.3             | 33.6             | 32.5             | 32.4             |
| Government debt                      | (million RON)  | 42 583           | 52 292           | 68 732           | 117 203          |
|                                      | (% of GDP)     | 12.4             | 12.6             | 13.4             | 23.9             |
| <b>Slovenia</b>                      |                |                  |                  |                  |                  |
| GDP mp                               | (million euro) | 31 050           | 34 568           | 37 305           | 35 384           |
| Government deficit (-) / surplus (+) | (million euro) | -404             | -1               | -667             | -2 061           |
|                                      | (% of GDP)     | -1.3             | 0.0              | -1.8             | -5.8             |
| Government expenditure               | (% of GDP)     | 44.5             | 42.4             | 44.1             | 49.0             |
| Government revenue                   | (% of GDP)     | 43.2             | 42.4             | 42.3             | 43.2             |
| Government debt                      | (million euro) | 8 289            | 8 085            | 8 389            | 12 519           |
|                                      | (% of GDP)     | 26.7             | 23.4             | 22.5             | 35.4             |
| <b>Slovakia</b>                      |                |                  |                  |                  |                  |
| GDP mp                               | (million euro) | 55 081           | 61 555           | 67 007           | 63 051           |
| Government deficit (-) / surplus (+) | (million euro) | -1 745           | -1 115           | -1 397           | -4 999           |
|                                      | (% of GDP)     | -3.2             | -1.8             | -2.1             | -7.9             |
| Government expenditure               | (% of GDP)     | 36.6             | 34.3             | 35.0             | 41.5             |
| Government revenue                   | (% of GDP)     | 33.4             | 32.5             | 32.9             | 33.6             |
| Government debt                      | (million euro) | 16 799           | 18 198           | 18 624           | 22 330           |
|                                      | (% of GDP)     | 30.5             | 29.6             | 27.8             | 35.4             |
| <b>Finland</b>                       |                |                  |                  |                  |                  |
| GDP mp                               | (million euro) | 165 643          | 179 702          | 184 649          | 171 315          |
| Government deficit (-) / surplus (+) | (million euro) | 6 645            | 9 314            | 7 788            | -4 261           |
|                                      | (% of GDP)     | 4.0              | 5.2              | 4.2              | -2.5             |
| Government expenditure               | (% of GDP)     | 49.0             | 47.2             | 49.3             | 56.0             |
| Government revenue                   | (% of GDP)     | 52.9             | 52.4             | 53.5             | 53.3             |
| Government debt                      | (million euro) | 65 696           | 63 225           | 63 015           | 75 085           |
|                                      | (% of GDP)     | 39.7             | 35.2             | 34.1             | 43.8             |
| <b>Sweden</b>                        |                |                  |                  |                  |                  |
| GDP mp                               | (million SEK)  | 2 944 480        | 3 126 018        | 3 213 659        | 3 108 002        |
| Government deficit (-) / surplus (+) | (million SEK)  | 68 821           | 111 357          | 70 599           | -28 609          |
|                                      | (% of GDP)     | 2.3              | 3.6              | 2.2              | -0.9             |
| Government expenditure               | (% of GDP)     | 52.7             | 51.0             | 51.5             | 54.9             |
| Government revenue                   | (% of GDP)     | 54.9             | 54.5             | 53.7             | 53.7             |
| Government debt                      | (million SEK)  | 1 323 980        | 1 249 715        | 1 226 729        | 1 300 976        |
|                                      | (% of GDP)     | 45.0             | 40.0             | 38.2             | 41.9             |
| <b>United Kingdom*</b>               |                |                  |                  |                  |                  |
| GDP mp                               | (million GBP)  | 1 328 363        | 1 404 845        | 1 445 580        | 1 392 634        |
| Government deficit (-) / surplus (+) | (million GBP)  | -35 778          | -38 324          | -72 291          | -158 095         |
|                                      | (% of GDP)     | -2.7             | -2.7             | -5.0             | -11.4            |
| Government expenditure               | (% of GDP)     | 44.2             | 44.0             | 47.4             | 51.6             |
| Government revenue                   | (% of GDP)     | 41.5             | 41.3             | 42.5             | 40.4             |
| Government debt                      | (million GBP)  | 577 123          | 624 700          | 753 630          | 949 673          |
|                                      | (% of GDP)     | 43.4             | 44.5             | 52.1             | 68.2             |
| <i>Financial year (fy)</i>           |                |                  |                  |                  |                  |
|                                      |                | <b>2006/2007</b> | <b>2007/2008</b> | <b>2008/2009</b> | <b>2009/2010</b> |
| GDP mp                               | (million GBP)  | 1 348 377        | 1 423 649        | 1 431 662        | 1 403 239        |
| Government deficit (-) / surplus (+) | (million GBP)  | -36 038          | -39 293          | -98 445          | -160 868         |
|                                      | (% of GDP)     | -2.7             | -2.8             | -6.9             | -11.5            |
| Government debt                      | (million GBP)  | 577 834          | 620 111          | 799 986          | 1 000 389        |
|                                      | (% of GDP)     | 42.9             | 43.6             | 55.9             | 71.3             |

\* Data refer to calendar years. Data referring to the financial year (1 April to 31 March), are shown in italics. For the United Kingdom, the relevant data for implementation of the excessive deficit procedure are financial year data.

## Annex: Main revisions between the April 2010 and October 2010 notifications

Below are shown country specific explanations for the largest revisions in deficit and debt for 2006-2009 between the April 2010 and October 2010 notifications, as well as in GDP.

Since the April 2010 notification, there have been revisions of the 2009 government deficit of between +0.3% and -0.3% in 21 Member States, of between -0.4% and -1.0% in three Member States, and over -1.0% in three Member States.

### Deficit

**Bulgaria:** The revisions in the deficit are mainly due to the implementation of the time-adjusted cash method for the recording of accrual tax revenue (2006-2009) and the reclassification of the railway infrastructure company inside the general government sector (2007).

**Germany:** The decrease in the deficit for 2009 is mainly due to updated source data on taxes and social contributions and non-financial assets.

**Greece:** See Information note on Greek fiscal data on the government finance statistics section on the Eurostat website: [http://epp.eurostat.ec.europa.eu/portal/page/portal/government\\_finance\\_statistics/introduction](http://epp.eurostat.ec.europa.eu/portal/page/portal/government_finance_statistics/introduction).

**Latvia:** The increase in the deficit for 2009 is mainly due to the reclassification of a capital injection into a bank as government expenditure.

**Lithuania:** The increase in the deficit for 2009 is due to updated source data on discounts and premiums on government securities.

**Hungary:** The increase in the deficit for 2009 is due to updated source data on investment.

**Malta:** The increase in the deficit for 2006-2008 is due to a methodological change in recording of government bonds issued as compensation to the Catholic Church.

**Portugal:** The revision in the deficit for 2006-2009 is due to the reclassification of a radio and TV company from the non-financial corporation sector into the government sector.

**Romania:** The increase in the deficit for 2008 and 2009 is mainly due to the reclassification of public corporations inside the general government sector and reclassification of a financial transaction as a non-financial transaction (2008).

**Slovenia:** The increase in the deficit for 2009 is mainly due to updated source data on taxes and social contributions.

**Slovakia:** The increase in the deficit for 2009 is mainly due to the revision of transactions relating to accrued taxes (notably due to the size of the settlements received in the following year) and the reclassification of capital injections in several public corporations as capital transfers.

**Finland:** The increase in the deficit for 2009 is mainly due to an upward revision of social security benefits data.

**Sweden:** The increase in the deficit for 2006-2009 is due to a major national accounts revision, updated source data and a methodological change in relation to the recording of local government employees' pension schemes.

### Debt

**Bulgaria:** The increase in the debt for 2007-2009 is due to the reclassification of the railway infrastructure company inside the general government sector.

**Greece:** See Information note on Greek fiscal data on the government finance statistics section on the Eurostat website: [http://epp.eurostat.ec.europa.eu/portal/page/portal/government\\_finance\\_statistics/introduction](http://epp.eurostat.ec.europa.eu/portal/page/portal/government_finance_statistics/introduction).

**Cyprus:** The increase in the debt for 2009 is due to updated source data.

**Portugal:** The increase in the debt for 2006-2009 is due to the reclassification of a radio and TV company from the non-financial corporation sector into the government sector.

**Slovakia:** The decrease in the debt in 2009 is due to an elimination of guaranteed debt, originally expected to be called.

**Sweden:** The revision in the debt for 2006-2009 is due to a correction of the conversion to national currency of swapped debt instruments.

### GDP

The GDP for 2009 notified in October 2010 for EDP purposes was revised by a number of Member States compared to that notified in April 2010 by small amounts, and by larger amounts (more than 1% of GDP) for Bulgaria, Ireland, Latvia, Portugal, Slovenia and Sweden. Changes in GDP affect deficit and debt ratios due to the denominator effect.



**Revisions in government deficit/surplus and government debt ratios**  
from the April 2010 to the October 2010 notification

|                       |                                                    | Deficit/surplus* |             |             |             | Debt        |             |             |             |
|-----------------------|----------------------------------------------------|------------------|-------------|-------------|-------------|-------------|-------------|-------------|-------------|
|                       |                                                    | 2006             | 2007        | 2008        | 2009        | 2006        | 2007        | 2008        | 2009        |
| <b>Belgium</b>        | <b>Revision in deficit/surplus and debt ratios</b> | <b>-0.1</b>      | <b>-0.1</b> | <b>-0.2</b> | <b>0.0</b>  | <b>0.0</b>  | <b>0.0</b>  | <b>-0.2</b> | <b>-0.5</b> |
|                       | - due to revision of deficit/surplus or debt       | -0.1             | -0.1        | -0.2        | 0.0         | 0.0         | 0.0         | -0.1        | -0.1        |
|                       | - due to revision of GDP                           | 0.0              | 0.0         | 0.0         | 0.0         | 0.0         | 0.0         | -0.1        | -0.4        |
| <b>Bulgaria</b>       | <b>Revision in deficit/surplus and debt ratios</b> | <b>-1.2</b>      | <b>1.1</b>  | <b>-0.2</b> | <b>-0.8</b> | <b>-1.1</b> | <b>-1.0</b> | <b>-0.4</b> | <b>-0.1</b> |
|                       | - due to revision of deficit/surplus or debt       | -1.0             | 1.1         | -0.1        | -0.9        | 0.0         | 0.1         | 0.2         | 0.4         |
|                       | - due to revision of GDP                           | -0.1             | 0.0         | -0.1        | 0.1         | -1.1        | -1.1        | -0.5        | -0.5        |
| <b>Czech Republic</b> | <b>Revision in deficit/surplus and debt ratios</b> | <b>0.0</b>       | <b>0.0</b>  | <b>0.0</b>  | <b>0.1</b>  | <b>0.0</b>  | <b>0.0</b>  | <b>0.0</b>  | <b>0.0</b>  |
|                       | - due to revision of deficit/surplus or debt       | 0.0              | 0.0         | 0.0         | 0.1         | 0.0         | 0.0         | 0.0         | -0.1        |
|                       | - due to revision of GDP                           | 0.0              | 0.0         | 0.0         | 0.0         | 0.0         | 0.0         | 0.0         | 0.0         |
| <b>Denmark</b>        | <b>Revision in deficit/surplus and debt ratios</b> | <b>0.0</b>       | <b>0.0</b>  | <b>0.0</b>  | <b>0.0</b>  | <b>0.0</b>  | <b>0.0</b>  | <b>0.0</b>  | <b>-0.2</b> |
|                       | - due to revision of deficit/surplus or debt       | 0.0              | 0.0         | 0.0         | 0.0         | 0.0         | 0.0         | 0.0         | -0.1        |
|                       | - due to revision of GDP                           | 0.0              | 0.0         | 0.0         | 0.0         | 0.0         | 0.0         | 0.0         | -0.1        |
| <b>Germany</b>        | <b>Revision in deficit/surplus and debt ratios</b> | <b>0.0</b>       | <b>0.1</b>  | <b>0.1</b>  | <b>0.3</b>  | <b>0.0</b>  | <b>-0.1</b> | <b>0.3</b>  | <b>0.2</b>  |
|                       | - due to revision of deficit/surplus or debt       | 0.0              | 0.1         | 0.1         | 0.3         | 0.0         | 0.0         | -0.1        | -0.1        |
|                       | - due to revision of GDP                           | 0.0              | 0.0         | 0.0         | 0.0         | 0.0         | -0.1        | 0.4         | 0.3         |
| <b>Estonia</b>        | <b>Revision in deficit/surplus and debt ratios</b> | <b>-0.1</b>      | <b>-0.1</b> | <b>-0.1</b> | <b>0.0</b>  | <b>-0.1</b> | <b>0.0</b>  | <b>0.0</b>  | <b>-0.1</b> |
|                       | - due to revision of deficit/surplus or debt       | 0.0              | 0.0         | -0.1        | 0.0         | 0.0         | 0.0         | 0.0         | 0.0         |
|                       | - due to revision of GDP                           | 0.0              | 0.0         | 0.0         | 0.0         | -0.1        | 0.0         | 0.0         | -0.1        |
| <b>Ireland</b>        | <b>Revision in deficit/surplus and debt ratios</b> | <b>0.0</b>       | <b>-0.1</b> | <b>0.0</b>  | <b>-0.1</b> | <b>-0.1</b> | <b>0.0</b>  | <b>0.4</b>  | <b>1.5</b>  |
|                       | - due to revision of deficit/surplus or debt       | 0.0              | -0.1        | 0.0         | 0.2         | 0.0         | 0.0         | 0.0         | 0.0         |
|                       | - due to revision of GDP                           | 0.0              | 0.0         | -0.1        | -0.3        | -0.1        | 0.0         | 0.4         | 1.6         |
| <b>Greece</b>         | <b>Revision in deficit/surplus and debt ratios</b> | <b>-2.2</b>      | <b>-1.3</b> | <b>-1.8</b> | <b>-1.8</b> | <b>8.3</b>  | <b>9.3</b>  | <b>11.1</b> | <b>11.7</b> |
|                       | - due to revision of deficit/surplus or debt       | -2.2             | -1.3        | -1.7        | -1.6        | 8.7         | 9.6         | 10.2        | 10.5        |
|                       | - due to revision of GDP                           | 0.0              | 0.0         | -0.1        | -0.1        | -0.4        | -0.3        | 0.9         | 1.2         |
| <b>Spain</b>          | <b>Revision in deficit/surplus and debt ratios</b> | <b>0.0</b>       | <b>0.0</b>  | <b>-0.1</b> | <b>0.1</b>  | <b>0.0</b>  | <b>0.0</b>  | <b>0.1</b>  | <b>-0.1</b> |
|                       | - due to revision of deficit/surplus or debt       | 0.0              | 0.0         | -0.1        | 0.0         | 0.0         | 0.0         | 0.1         | 0.1         |
|                       | - due to revision of GDP                           | 0.0              | 0.0         | 0.0         | 0.0         | 0.0         | 0.0         | 0.0         | -0.1        |
| <b>France</b>         | <b>Revision in deficit/surplus and debt ratios</b> | <b>0.0</b>       | <b>0.0</b>  | <b>0.0</b>  | <b>0.0</b>  | <b>0.0</b>  | <b>0.0</b>  | <b>0.0</b>  | <b>0.5</b>  |
|                       | - due to revision of deficit/surplus or debt       | 0.0              | 0.0         | 0.0         | 0.1         | 0.0         | 0.0         | 0.0         | 0.0         |
|                       | - due to revision of GDP                           | 0.0              | 0.0         | 0.0         | 0.0         | 0.0         | 0.0         | 0.0         | 0.5         |
| <b>Italy</b>          | <b>Revision in deficit/surplus and debt ratios</b> | <b>0.0</b>       | <b>0.0</b>  | <b>0.0</b>  | <b>0.0</b>  | <b>0.1</b>  | <b>0.1</b>  | <b>0.2</b>  | <b>0.2</b>  |
|                       | - due to revision of deficit/surplus or debt       | 0.0              | 0.0         | 0.0         | 0.0         | 0.1         | 0.1         | 0.2         | 0.2         |
|                       | - due to revision of GDP                           | 0.0              | 0.0         | 0.0         | 0.0         | 0.0         | 0.0         | 0.0         | 0.0         |
| <b>Cyprus</b>         | <b>Revision in deficit/surplus and debt ratios</b> | <b>0.0</b>       | <b>0.0</b>  | <b>0.0</b>  | <b>0.1</b>  | <b>0.0</b>  | <b>0.0</b>  | <b>-0.1</b> | <b>1.8</b>  |
|                       | - due to revision of deficit/surplus or debt       | 0.0              | 0.0         | 0.0         | 0.1         | 0.0         | 0.0         | 0.0         | 1.8         |
|                       | - due to revision of GDP                           | 0.0              | 0.0         | 0.0         | 0.0         | 0.0         | 0.0         | -0.1        | 0.0         |
| <b>Latvia</b>         | <b>Revision in deficit/surplus and debt ratios</b> | <b>0.0</b>       | <b>0.0</b>  | <b>0.0</b>  | <b>-1.3</b> | <b>0.0</b>  | <b>0.0</b>  | <b>0.1</b>  | <b>0.6</b>  |
|                       | - due to revision of deficit/surplus or debt       | 0.0              | 0.0         | 0.0         | -1.2        | 0.0         | 0.0         | 0.0         | 0.1         |
|                       | - due to revision of GDP                           | 0.0              | 0.0         | 0.0         | -0.1        | 0.0         | 0.0         | 0.1         | 0.4         |
| <b>Lithuania</b>      | <b>Revision in deficit/surplus and debt ratios</b> | <b>0.0</b>       | <b>0.0</b>  | <b>0.0</b>  | <b>-0.3</b> | <b>0.0</b>  | <b>0.0</b>  | <b>0.0</b>  | <b>0.1</b>  |
|                       | - due to revision of deficit/surplus or debt       | 0.0              | 0.0         | 0.0         | -0.2        | 0.0         | 0.0         | 0.0         | -0.1        |
|                       | - due to revision of GDP                           | 0.0              | 0.0         | 0.0         | -0.1        | 0.0         | 0.0         | 0.0         | 0.3         |
| <b>Luxembourg</b>     | <b>Revision in deficit/surplus and debt ratios</b> | <b>0.0</b>       | <b>0.1</b>  | <b>0.1</b>  | <b>0.0</b>  | <b>0.2</b>  | <b>0.0</b>  | <b>-0.1</b> | <b>0.1</b>  |
|                       | - due to revision of deficit/surplus or debt       | 0.0              | 0.1         | 0.1         | 0.0         | 0.1         | 0.0         | 0.0         | 0.2         |
|                       | - due to revision of GDP                           | 0.0              | 0.0         | 0.0         | 0.0         | 0.0         | 0.0         | -0.1        | -0.1        |
| <b>Hungary</b>        | <b>Revision in deficit/surplus and debt ratios</b> | <b>0.0</b>       | <b>0.0</b>  | <b>0.1</b>  | <b>-0.4</b> | <b>0.1</b>  | <b>0.2</b>  | <b>-0.6</b> | <b>0.1</b>  |
|                       | - due to revision of deficit/surplus or debt       | 0.0              | 0.0         | 0.1         | -0.4        | 0.0         | 0.0         | 0.0         | 0.0         |
|                       | - due to revision of GDP                           | 0.0              | 0.0         | 0.0         | 0.0         | 0.1         | 0.2         | -0.6        | 0.1         |

\* Revisions to deficit/surplus ratios: a positive sign means an improved government balance relative to GDP, and a negative sign a worsening.

**Revisions in government deficit/surplus and government debt ratios**  
from from the April 2010 to the October 2010 notification

|                       |                                                    | Deficit/surplus* |             |             |             | Debt        |             |             |             |
|-----------------------|----------------------------------------------------|------------------|-------------|-------------|-------------|-------------|-------------|-------------|-------------|
|                       |                                                    | 2006             | 2007        | 2008        | 2009        | 2006        | 2007        | 2008        | 2009        |
| <b>Malta</b>          | <b>Revision in deficit/surplus and debt ratios</b> | <b>-0.2</b>      | <b>-0.1</b> | <b>-0.3</b> | <b>0.0</b>  | <b>-0.3</b> | <b>-0.2</b> | <b>-0.5</b> | <b>-0.5</b> |
|                       | - due to revision of deficit/surplus or debt       | -0.2             | -0.1        | -0.3        | 0.0         | 0.0         | 0.0         | 0.0         | 0.0         |
|                       | - due to revision of GDP                           | 0.0              | 0.0         | 0.0         | 0.0         | -0.3        | -0.2        | -0.5        | -0.5        |
| <b>Netherlands</b>    | <b>Revision in deficit/surplus and debt ratios</b> | <b>0.0</b>       | <b>0.0</b>  | <b>-0.1</b> | <b>-0.1</b> | <b>0.0</b>  | <b>-0.2</b> | <b>0.0</b>  | <b>-0.1</b> |
|                       | - due to revision of deficit/surplus or debt       | 0.0              | 0.0         | -0.1        | -0.1        | 0.0         | 0.1         | 0.1         | 0.1         |
|                       | - due to revision of GDP                           | 0.0              | 0.0         | 0.0         | 0.0         | 0.0         | -0.2        | 0.0         | -0.2        |
| <b>Austria</b>        | <b>Revision in deficit/surplus and debt ratios</b> | <b>0.0</b>       | <b>0.0</b>  | <b>0.0</b>  | <b>-0.1</b> | <b>-0.2</b> | <b>-0.2</b> | <b>-0.2</b> | <b>1.0</b>  |
|                       | - due to revision of deficit/surplus or debt       | 0.0              | 0.0         | 0.0         | 0.0         | 0.0         | 0.1         | 0.1         | 0.4         |
|                       | - due to revision of GDP                           | 0.0              | 0.0         | 0.0         | 0.0         | -0.2        | -0.3        | -0.3        | 0.6         |
| <b>Poland</b>         | <b>Revision in deficit/surplus and debt ratios</b> | <b>0.0</b>       | <b>0.0</b>  | <b>0.0</b>  | <b>-0.1</b> | <b>0.0</b>  | <b>0.0</b>  | <b>-0.1</b> | <b>-0.1</b> |
|                       | - due to revision of deficit/surplus or debt       | 0.0              | 0.0         | 0.0         | -0.1        | 0.0         | 0.0         | 0.0         | 0.0         |
|                       | - due to revision of GDP                           | 0.0              | 0.0         | 0.0         | 0.0         | 0.0         | 0.0         | -0.1        | 0.0         |
| <b>Portugal</b>       | <b>Revision in deficit/surplus and debt ratios</b> | <b>-0.1</b>      | <b>-0.2</b> | <b>-0.1</b> | <b>0.1</b>  | <b>-0.8</b> | <b>-0.9</b> | <b>-1.0</b> | <b>-0.7</b> |
|                       | - due to revision of deficit/surplus or debt       | -0.2             | -0.3        | -0.2        | -0.2        | 1.2         | 1.3         | 1.1         | 1.2         |
|                       | - due to revision of GDP                           | 0.1              | 0.1         | 0.1         | 0.2         | -1.9        | -2.1        | -2.2        | -1.9        |
| <b>Romania</b>        | <b>Revision in deficit/surplus and debt ratios</b> | <b>-0.1</b>      | <b>-0.1</b> | <b>-0.3</b> | <b>-0.3</b> | <b>0.0</b>  | <b>0.0</b>  | <b>0.0</b>  | <b>0.1</b>  |
|                       | - due to revision of deficit/surplus or debt       | -0.1             | -0.1        | -0.3        | -0.3        | 0.0         | 0.0         | 0.0         | 0.1         |
|                       | - due to revision of GDP                           | 0.0              | 0.0         | 0.0         | 0.0         | 0.0         | 0.0         | 0.0         | 0.0         |
| <b>Slovenia</b>       | <b>Revision in deficit/surplus and debt ratios</b> | <b>0.0</b>       | <b>0.0</b>  | <b>-0.1</b> | <b>-0.3</b> | <b>0.0</b>  | <b>0.0</b>  | <b>-0.1</b> | <b>-0.5</b> |
|                       | - due to revision of deficit/surplus or debt       | 0.0              | 0.0         | -0.1        | -0.4        | 0.0         | 0.0         | 0.0         | 0.0         |
|                       | - due to revision of GDP                           | 0.0              | 0.0         | 0.0         | 0.1         | 0.0         | 0.0         | -0.1        | -0.5        |
| <b>Slovakia</b>       | <b>Revision in deficit/surplus and debt ratios</b> | <b>0.3</b>       | <b>0.0</b>  | <b>0.2</b>  | <b>-1.2</b> | <b>0.0</b>  | <b>0.2</b>  | <b>0.1</b>  | <b>-0.2</b> |
|                       | - due to revision of deficit/surplus or debt       | 0.3              | 0.0         | 0.2         | -1.1        | 0.1         | 0.2         | 0.0         | -0.4        |
|                       | - due to revision of GDP                           | 0.0              | 0.0         | 0.0         | 0.0         | 0.0         | 0.0         | 0.1         | 0.2         |
| <b>Finland</b>        | <b>Revision in deficit/surplus and debt ratios</b> | <b>0.0</b>       | <b>0.0</b>  | <b>0.0</b>  | <b>-0.3</b> | <b>0.0</b>  | <b>0.0</b>  | <b>-0.1</b> | <b>-0.2</b> |
|                       | - due to revision of deficit/surplus or debt       | 0.0              | 0.0         | 0.0         | -0.3        | 0.0         | 0.0         | 0.0         | -0.1        |
|                       | - due to revision of GDP                           | 0.0              | 0.0         | 0.0         | 0.0         | 0.0         | 0.0         | -0.1        | -0.1        |
| <b>Sweden</b>         | <b>Revision in deficit/surplus and debt ratios</b> | <b>-0.2</b>      | <b>-0.3</b> | <b>-0.3</b> | <b>-0.4</b> | <b>-0.8</b> | <b>-0.8</b> | <b>-0.1</b> | <b>-0.5</b> |
|                       | - due to revision of deficit/surplus or debt       | -0.2             | -0.2        | -0.2        | -0.4        | -0.1        | 0.0         | 0.6         | 0.2         |
|                       | - due to revision of GDP                           | 0.0              | -0.1        | 0.0         | 0.0         | -0.7        | -0.8        | -0.7        | -0.7        |
| <b>United Kingdom</b> | <b>Revision in deficit/surplus and debt ratios</b> | <b>0.0</b>       | <b>0.0</b>  | <b>-0.1</b> | <b>0.1</b>  | <b>-0.1</b> | <b>-0.2</b> | <b>0.1</b>  | <b>0.1</b>  |
|                       | - due to revision of deficit/surplus or debt       | 0.0              | 0.0         | -0.1        | 0.2         | 0.0         | 0.0         | 0.0         | 0.0         |
|                       | - due to revision of GDP                           | 0.0              | 0.0         | 0.0         | 0.0         | -0.1        | -0.2        | 0.1         | 0.2         |
| <b>EU27</b>           | <b>Revision in deficit/surplus and debt ratios</b> | <b>0.0</b>       | <b>0.0</b>  | <b>-0.1</b> | <b>0.0</b>  | <b>0.1</b>  | <b>0.1</b>  | <b>0.3</b>  | <b>0.4</b>  |
|                       | - due to revision of deficit/surplus or debt       | 0.0              | 0.0         | -0.1        | 0.0         | 0.2         | 0.2         | 0.2         | 0.3         |
|                       | - due to revision of GDP                           | 0.0              | 0.0         | 0.0         | 0.0         | -0.1        | -0.2        | 0.0         | 0.1         |
| <b>EA16</b>           | <b>Revision in deficit/surplus and debt ratios</b> | <b>-0.1</b>      | <b>0.0</b>  | <b>-0.1</b> | <b>0.0</b>  | <b>0.2</b>  | <b>0.2</b>  | <b>0.4</b>  | <b>0.5</b>  |
|                       | - due to revision of deficit/surplus or debt       | -0.1             | 0.0         | -0.1        | 0.0         | 0.3         | 0.3         | 0.3         | 0.3         |
|                       | - due to revision of GDP                           | 0.0              | 0.0         | 0.0         | 0.0         | -0.1        | -0.1        | 0.1         | 0.2         |

\* Revisions to deficit/surplus ratios: a positive sign means an improved government balance relative to GDP, and a negative sign a worsening.
