# Supplementary material
Source: publisher figshare collection journal article supplement (https://tandf.figshare.com/articles/dataset/_/4793563)
Supplement: Supplementary file 11 [file 1]

## Provision of deficit and debt data for 2007

## Euro area and EU27 government deficit at 0.6% and 0.9% of GDP respectively

### Government debt at 66.3% and 58.7%

In 2007, the government deficit<sup>1</sup> of both the **euro area**<sup>2</sup> (EA15) and the **EU27** fell compared with 2006, while the government debt<sup>1</sup> increased in absolute terms. In the **euro area** the government deficit decreased from 1.3% of GDP in 2006 to 0.6% in 2007<sup>3</sup>, and in the **EU27** it fell from 1.4% to 0.9%. In the **euro area** the government debt to GDP ratio fell from 68.4% at the end of 2006 to 66.3% at the end of 2007, and in the **EU27** from 61.2% to 58.7%.

|                                      |                | 2004       | 2005       | 2006       | 2007       |
|--------------------------------------|----------------|------------|------------|------------|------------|
| <b>Euro area (EA15)</b>              |                |            |            |            |            |
| GDP market prices (mp)               | (million euro) | 7 822 579  | 8 107 071  | 8 494 452  | 8 903 107  |
| Government deficit (-) / surplus (+) | (million euro) | -226 175   | -202 370   | -111 487   | -54 959    |
|                                      | % of GDP       | -2.9       | -2.5       | -1.3       | -0.6       |
| Government expenditure               | % of GDP       | 47.5       | 47.4       | 46.8       | 46.3       |
| Government revenue                   | % of GDP       | 44.6       | 44.9       | 45.4       | 45.6       |
| Government debt                      | (million euro) | 5 441 389  | 5 690 586  | 5 815 427  | 5 911 462  |
|                                      | % of GDP       | 69.5       | 70.1       | 68.4       | 66.3       |
| <b>EU27</b>                          |                |            |            |            |            |
| GDP mp                               | (million euro) | 10 613 788 | 11 066 425 | 11 673 923 | 12 333 194 |
| Government deficit (-) / surplus (+) | (million euro) | -301 767   | -271 223   | -167 750   | -109 474   |
|                                      | % of GDP       | -2.8       | -2.5       | -1.4       | -0.9       |
| Government expenditure               | % of GDP       | 46.7       | 46.9       | 46.3       | 45.8       |
| Government revenue                   | % of GDP       | 43.9       | 44.4       | 44.9       | 44.9       |
| Government debt                      | (million euro) | 6 589 624  | 6 929 263  | 7 151 307  | 7 240 784  |
|                                      | % of GDP       | 62.0       | 62.6       | 61.2       | 58.7       |

In 2007 the largest government deficits in percentage of GDP were recorded by **Hungary** (-5.5%), the **United Kingdom** (-2.9%), **Greece** (-2.8%), **France** (-2.7%) and **Portugal** (-2.6%). Eleven Member States registered a government surplus in 2007: **Finland** (+5.3%), **Denmark** (+4.4%), **Sweden** (+3.5%), **Bulgaria** (+3.4%), **Cyprus** (+3.3%), **Luxembourg** (+2.9%), **Estonia** (+2.8%), **Spain** (+2.2%), **Netherlands** (+0.4%), **Ireland** (+0.3%) and **Germany** (0.0%). In all, 17 Member States recorded an improved government balance relative to GDP in 2007 compared to 2006, and 10 a worsening.

At the end of 2007, the lowest ratios of government debt to GDP were recorded in **Estonia** (3.4%), **Luxembourg** (6.8%), **Latvia** (9.7%) and **Romania** (13.0%). Eight Member States had government debt ratios higher than 60% of GDP in 2007: **Italy** (104.0%), **Greece** (94.5%), **Belgium** (84.9%), **Hungary** (66.0%), **Germany** (65.0%), **France** (64.2%), **Portugal** (63.6%) and **Malta** (62.6%).

In 2007, government expenditure<sup>4</sup> in the **euro area** was equivalent to 46.3% of GDP, and government revenue<sup>4</sup> to 45.6%. The figures for the **EU27** were 45.8% and 44.9% respectively. In both zones between 2006 and 2007, the government expenditure ratio decreased, while the government revenue ratio increased slightly for the **euro area** and stayed unchanged for the **EU27**.

## Reservation on reported data<sup>5</sup>

**Greece:** Eurostat is in the process of clarifying, in close co-operation with the Greek statistical authorities, some issues relating to the recording of EU grants in 2006 and 2007, the existence of a substantial statistical discrepancy in 2007 of 0.6% of GDP and the insufficient coverage of source data for extra-budgetary funds, local government and social security funds achieved for the first estimate of the 2007 balance.

## Amendment by Eurostat to reported data<sup>6</sup>

**United Kingdom:** Eurostat has amended the deficit data notified by the United Kingdom for years 2004 to 2007 for consistency of recording of UMTS licences proceeds. This leads to an increase in the government deficit in 2004, 2005 and 2007 (as well as for financial year 2004/2005 and 2005/2006) by GBP 1044 mn (0.1% of GDP) and in 2006 (financial years 2003/2004 and 2006/2007) by GBP 1045 mn (0.1% of GDP). There is no change in the reported debt figures.

## Other issues

Eurostat is in the process of clarifying the accounting treatment of flows and debt relating to public infrastructure investments, as well as the sector classification of the concerned public units.

The recent events in the financial markets, as well as the interventions of governments in support of affected financial institutions directly or indirectly, have raised a number of national accounting issues, which will be addressed with the concerned Member States in the coming weeks.

## Background

In this News Release **Eurostat, the Statistical Office of the European Communities**, is providing<sup>7</sup> government deficit and debt data based on figures reported in the **first 2008 notification** by EU Member States for the years 2004-2007, for the application of the excessive deficit procedure (EDP). This notification is based on the ESA95 system of national accounts. This News Release also includes data on government expenditure and revenue and an annex with the main revisions since the October 2007 News Release.

Eurostat will also be releasing information on the underlying government sector accounts, as well as on the contribution of deficit/surplus and other relevant factors to the variation in the debt level (stock-flow adjustment), on the government finance statistics section on its website:

[http://epp.eurostat.ec.europa.eu/pls/portal/url/page/PGP\\_DS\\_GFS/PGE\\_DS\\_GFS\\_0](http://epp.eurostat.ec.europa.eu/pls/portal/url/page/PGP_DS_GFS/PGE_DS_GFS_0)

1. According to the Protocol on the excessive deficit procedure annexed to the EC Treaty, government deficit (surplus) means the net borrowing (net lending) of the whole general government sector (central government, state government, local government and social security funds). It is calculated according to national accounts concepts (European System of Accounts, ESA95). Government debt is the consolidated gross debt of the whole general government sector outstanding at the end of the year (at nominal value).
  - Table of euro area and EU27 aggregates: the data are in euro. For those countries not belonging to the euro area, the rate of conversion into euro is as follows:
    - for deficit / surplus and GDP data, the annual average exchange rate;
    - for the stock of government debt, the end of year exchange rate.
  - Table of national data: these are in national currencies. For Cyprus and Malta, data for years prior to 2008 have been converted into euro according to the irrevocable conversion rate.
2. Euro area (EA15): Belgium, Germany, Greece, Spain, France, Ireland, Italy, Cyprus, Luxembourg, Malta, Netherlands, Austria, Portugal, Slovenia and Finland. In the attached tables, the euro area is defined as including Cyprus and Malta for the full period, though Cyprus and Malta joined the euro area on 1 January 2008.
3. In the previous notification, the 2006 government deficits for the EA13 and the EU27 were 1.5% and 1.6% of GDP respectively. The government debt of the EA13 was 68.6% of GDP and of the EU27 61.4% of GDP. See News Release 142/2007 of 22 October 2007.
4. Government expenditure and revenue are reported to Eurostat under the ESA95 transmission programme. They are the sum of non-financial transactions by general government, and include both current and capital transactions. For definitions, see Council Regulation No. 2223/96, as amended. It should be noted that the government balance (i.e. the difference between total government revenue and expenditure) is not the exactly the same under ESA95 as that for the purpose of the excessive deficit procedure. Regulation (EC) No 2558/2001 on the reclassification of settlements under swaps agreements and forward rate agreements implies that there are two relevant definitions of government deficit/surplus:
  - The ESA95 definition of net lending /net borrowing does not include streams of payments and receipts resulting from swap agreements and forward rate agreements, as these are recorded as financial transaction;
  - For the purpose of the excessive deficit procedure, streams of payments and receipts resulting from swaps and forward rate agreements are recorded as interest expenditure and contribute to the net lending/net borrowing of general government.Concerning 2007, for most Member States the difference, if any, between the two balances is minor except in **Greece** (+0.28%) and **Austria** (+0.13%). These differences improve net lending/net borrowing for EDP purposes for both these countries.

5. The term "reservations" is defined in article 8h(1) of Council Regulation 3605/93, as amended. The Commission (Eurostat) expresses reservations when it has doubts on the quality of the reported data.
6. According to Article 8h(2) of Council Regulation 3605/93 as amended, the Commission (Eurostat) may amend actual data reported by Member States and provide the amended data and a justification of the amendment where there is evidence that actual data reported by Member States do not comply with the quality requirements (compliance with accounting rules, completeness, reliability, timeliness and consistency of statistical data).
7. According to Article 8g(1) of Council Regulation 3605/93, Eurostat provides the actual government deficit and debt data for the application of the Protocol on the excessive deficit procedure, within three weeks after the reporting deadlines. This provision of data shall be effected through publication.

*For further information on the methodology of statistics reported under the excessive deficit procedure, please see Council Regulation 3605/93, as amended (consolidated version available at <http://eur-lex.europa.eu/LexUriServ/site/en/consleg/1993/R/01993R3605-20051223-en.pdf>), Council Regulation 2223/96, as amended (consolidated version available at <http://eur-lex.europa.eu/LexUriServ/site/en/consleg/1996/R/01996R2223-20030807-en.pdf>) and the Eurostat publication "**ESA95 manual on government deficit and debt**", second edition (2002), 240 pages, ISBN 92-894-3231-4, pdf file free of charge, paper copy 37 euro (excluding VAT). Additions to this manual on securitisation, capital injections, classification of funded pension schemes, lump sum payments to government in the context of the transfer of pension obligations, and long term contracts between government units and non-government partners are available in the government finance statistics section on the Eurostat website.*

Issued by:  
**Eurostat Press Office**

**Tim ALLEN**  
**Tel: +352-4301-33 444**  
**[eurostat-pressoffice@ec.europa.eu](mailto:eurostat-pressoffice@ec.europa.eu)**

Eurostat news releases on the Internet:  
**<http://ec.europa.eu/eurostat>**

Selected Principal European Economic Indicators:  
**<http://ec.europa.eu/eurostat/euroindicators>**

**GDP, government deficit/surplus and debt in the EU (in national currencies)**

|                                      |                | 2004      | 2005      | 2006      | 2007      |
|--------------------------------------|----------------|-----------|-----------|-----------|-----------|
| <b>Belgium</b>                       |                |           |           |           |           |
| GDP mp                               | (million euro) | 289 690   | 301 966   | 316 622   | 330 470   |
| Government deficit (-) / surplus (+) | (million euro) | 39        | -6901     | 1096      | -574      |
|                                      | % of GDP       | 0.0       | -2.3      | 0.3       | -0.2      |
| Government expenditure               | % of GDP       | 49.2      | 51.8      | 48.5      | 48.9      |
| Government revenue                   | % of GDP       | 49.1      | 49.4      | 48.8      | 48.7      |
| Government debt                      | (million euro) | 272 894   | 278 170   | 279 279   | 280 507   |
|                                      | % of GDP       | 94.2      | 92.1      | 88.2      | 84.9      |
| <b>Bulgaria</b>                      |                |           |           |           |           |
| GDP mp                               | (million BGN)  | 38 822.6  | 42 797.4  | 49 361.0  | 56 519.8  |
| Government deficit (-) / surplus (+) | (million BGN)  | 557.9     | 772.0     | 1 478.0   | 1 919.1   |
|                                      | % of GDP       | 1.4       | 1.8       | 3.0       | 3.4       |
| Government expenditure               | % of GDP       | 39.7      | 39.2      | 36.4      | 37.8      |
| Government revenue                   | % of GDP       | 41.2      | 41.0      | 39.4      | 41.2      |
| Government debt                      | (million BGN)  | 14 720.4  | 12 498.0  | 11 189.2  | 10 281.7  |
|                                      | % of GDP       | 37.9      | 29.2      | 22.7      | 18.2      |
| <b>Czech Republic</b>                |                |           |           |           |           |
| GDP mp                               | (million CZK)  | 2 814 762 | 2 987 722 | 3 231 576 | 3 557 653 |
| Government deficit (-) / surplus (+) | (million CZK)  | -83 278   | -106 749  | -85 902   | -56 070   |
|                                      | % of GDP       | -3.0      | -3.6      | -2.7      | -1.6      |
| Government expenditure               | % of GDP       | 45.1      | 44.9      | 43.6      | 42.4      |
| Government revenue                   | % of GDP       | 42.2      | 41.4      | 41.0      | 40.8      |
| Government debt                      | (million CZK)  | 855 102   | 888 579   | 951 474   | 1 019 418 |
|                                      | % of GDP       | 30.4      | 29.7      | 29.4      | 28.7      |
| <b>Denmark</b>                       |                |           |           |           |           |
| GDP mp                               | (million DKK)  | 1 466 200 | 1 548 200 | 1 641 500 | 1 695 500 |
| Government deficit (-) / surplus (+) | (million DKK)  | 27 200    | 77 400    | 79 300    | 74 600    |
|                                      | % of GDP       | 1.9       | 5.0       | 4.8       | 4.4       |
| Government expenditure               | % of GDP       | 54.6      | 52.7      | 51.2      | 50.6      |
| Government revenue                   | % of GDP       | 56.4      | 57.7      | 56.1      | 55.1      |
| Government debt                      | (million DKK)  | 641 900   | 563 100   | 498 400   | 440 900   |
|                                      | % of GDP       | 43.8      | 36.4      | 30.4      | 26.0      |
| <b>Germany</b>                       |                |           |           |           |           |
| GDP mp                               | (million euro) | 2 211 200 | 2 244 600 | 2 322 200 | 2 423 800 |
| Government deficit (-) / surplus (+) | (million euro) | -83 550   | -75 350   | -36 960   | 440       |
|                                      | % of GDP       | -3.8      | -3.4      | -1.6      | 0.0       |
| Government expenditure               | % of GDP       | 47.1      | 46.9      | 45.4      | 43.9      |
| Government revenue                   | % of GDP       | 43.3      | 43.5      | 43.8      | 43.9      |
| Government debt                      | (million euro) | 1 451 108 | 1 521 496 | 1 569 037 | 1 576 305 |
|                                      | % of GDP       | 65.6      | 67.8      | 67.6      | 65.0      |
| <b>Estonia</b>                       |                |           |           |           |           |
| GDP mp                               | (million EEK)  | 149 923   | 175 392   | 207 061   | 243 252   |
| Government deficit (-) / surplus (+) | (million EEK)  | 2 333     | 3 075     | 6 941     | 6 866     |
|                                      | % of GDP       | 1.6       | 1.8       | 3.4       | 2.8       |
| Government expenditure               | % of GDP       | 34.1      | 33.5      | 33.0      | 33.7      |
| Government revenue                   | % of GDP       | 35.9      | 35.4      | 36.6      | 36.9      |
| Government debt                      | (million EEK)  | 7 719     | 7 938     | 8 787     | 8 302     |
|                                      | % of GDP       | 5.1       | 4.5       | 4.2       | 3.4       |
| <b>Ireland</b>                       |                |           |           |           |           |
| GDP mp                               | (million euro) | 148 502   | 161 498   | 174 705   | 185 788   |
| Government deficit (-) / surplus (+) | (million euro) | 2 053     | 2 637     | 5 213     | 554       |
|                                      | % of GDP       | 1.4       | 1.6       | 3.0       | 0.3       |
| Government expenditure               | % of GDP       | 33.9      | 33.8      | 34.2      | 36.4      |
| Government revenue                   | % of GDP       | 35.3      | 35.5      | 37.2      | 36.7      |
| Government debt                      | (million euro) | 43 857    | 44 228    | 43 783    | 47 199    |
|                                      | % of GDP       | 29.5      | 27.4      | 25.1      | 25.4      |

## GDP, government deficit/surplus and debt in the EU (in national currencies)

|                                      |                | 2004      | 2005      | 2006      | 2007      |
|--------------------------------------|----------------|-----------|-----------|-----------|-----------|
| <b>Greece</b>                        |                |           |           |           |           |
| GDP mp                               | (million euro) | 185 225   | 198 609   | 213 985   | 228 949   |
| Government deficit (-) / surplus (+) | (million euro) | -13 672   | -10 204   | -5 646    | -6 514    |
|                                      | % of GDP       | -7.4      | -5.1      | -2.6      | -2.8      |
| Government expenditure               | % of GDP       | 45.4      | 43.1      | 42.3      | 43.3      |
| Government revenue                   | % of GDP       | 38.1      | 37.8      | 39.4      | 40.2      |
| Government debt                      | (million euro) | 182 702   | 194 666   | 204 018   | 216 362   |
|                                      | % of GDP       | 98.6      | 98.0      | 95.3      | 94.5      |
| <b>Spain</b>                         |                |           |           |           |           |
| GDP mp                               | (million euro) | 841 042   | 908 450   | 980 954   | 1 049 848 |
| Government deficit (-) / surplus (+) | (million euro) | -2 862    | 8 759     | 17 538    | 23 139    |
|                                      | % of GDP       | -0.3      | 1.0       | 1.8       | 2.2       |
| Government expenditure               | % of GDP       | 38.9      | 38.5      | 38.6      | 38.8      |
| Government revenue                   | % of GDP       | 38.5      | 39.4      | 40.4      | 41.0      |
| Government debt                      | (million euro) | 388 374   | 390 948   | 389 193   | 379 742   |
|                                      | % of GDP       | 46.2      | 43.0      | 39.7      | 36.2      |
| <b>France</b>                        |                |           |           |           |           |
| GDP mp                               | (million euro) | 1 660 189 | 1 726 121 | 1 807 462 | 1 883 643 |
| Government deficit (-) / surplus (+) | (million euro) | -59 576   | -50 368   | -42 570   | -50 301   |
|                                      | % of GDP       | -3.6      | -2.9      | -2.4      | -2.7      |
| Government expenditure               | % of GDP       | 53.2      | 53.4      | 52.7      | 52.6      |
| Government revenue                   | % of GDP       | 49.6      | 50.4      | 50.3      | 49.9      |
| Government debt                      | (million euro) | 1 076 932 | 1 145 354 | 1 149 928 | 1 209 497 |
|                                      | % of GDP       | 64.9      | 66.4      | 63.6      | 64.2      |
| <b>Italy</b>                         |                |           |           |           |           |
| GDP mp                               | (million euro) | 1 391 530 | 1 428 375 | 1 479 981 | 1 535 540 |
| Government deficit (-) / surplus (+) | (million euro) | -48 312   | -60 428   | -49 634   | -29 179   |
|                                      | % of GDP       | -3.5      | -4.2      | -3.4      | -1.9      |
| Government expenditure               | % of GDP       | 47.7      | 48.2      | 48.8      | 48.5      |
| Government revenue                   | % of GDP       | 44.2      | 43.8      | 45.4      | 46.6      |
| Government debt                      | (million euro) | 1 444 604 | 1 511 554 | 1 575 636 | 1 596 762 |
|                                      | % of GDP       | 103.8     | 105.8     | 106.5     | 104.0     |
| <b>Cyprus</b>                        |                |           |           |           |           |
| GDP mp                               | (million euro) | 12 654    | 13 462    | 14 394    | 15 490    |
| Government deficit (-) / surplus (+) | (million euro) | -516      | -326      | -173      | 506       |
|                                      | % of GDP       | -4.1      | -2.4      | -1.2      | 3.3       |
| Government expenditure               | % of GDP       | 42.8      | 43.6      | 43.6      | 43.9      |
| Government revenue                   | % of GDP       | 38.7      | 41.2      | 42.4      | 47.2      |
| Government debt                      | (million euro) | 8 883     | 9 300     | 9 331     | 9 262     |
|                                      | % of GDP       | 70.2      | 69.1      | 64.8      | 59.8      |
| <b>Latvia</b>                        |                |           |           |           |           |
| GDP mp                               | (million LVL)  | 7 435     | 9 059     | 11 172    | 13 957    |
| Government deficit (-) / surplus (+) | (million LVL)  | -77       | -32       | -24       | -6        |
|                                      | % of GDP       | -1.0      | -0.4      | -0.2      | 0.0       |
| Government expenditure               | % of GDP       | 35.8      | 35.6      | 37.9      | 38.0      |
| Government revenue                   | % of GDP       | 34.7      | 35.2      | 37.7      | 38.0      |
| Government debt                      | (million LVL)  | 1 110     | 1 122     | 1 191     | 1 356     |
|                                      | % of GDP       | 14.9      | 12.4      | 10.7      | 9.7       |
| <b>Lithuania</b>                     |                |           |           |           |           |
| GDP mp                               | (million LTL)  | 62 587    | 71 380    | 81 905    | 96 740    |
| Government deficit (-) / surplus (+) | (million LTL)  | -964      | -362      | -373      | -1 192    |
|                                      | % of GDP       | -1.5      | -0.5      | -0.5      | -1.2      |
| Government expenditure               | % of GDP       | 33.4      | 33.6      | 33.9      | 35.6      |
| Government revenue                   | % of GDP       | 31.8      | 33.1      | 33.4      | 34.3      |
| Government debt                      | (million LTL)  | 12 155    | 13 276    | 14 939    | 16 698    |
|                                      | % of GDP       | 19.4      | 18.6      | 18.2      | 17.3      |

**GDP, government deficit/surplus and debt in the EU (in national currencies)**

|                                      |                | 2004       | 2005       | 2006       | 2007       |
|--------------------------------------|----------------|------------|------------|------------|------------|
| <b>Luxembourg</b>                    |                |            |            |            |            |
| GDP mp                               | (million euro) | 27 439     | 30 032     | 33 853     | 36 608     |
| Government deficit (-) / surplus (+) | (million euro) | -338       | -34        | 439        | 1 072      |
|                                      | % of GDP       | -1.2       | -0.1       | 1.3        | 2.9        |
| Government expenditure               | % of GDP       | 42.6       | 41.8       | 38.6       | 37.5       |
| Government revenue                   | % of GDP       | 41.4       | 41.7       | 39.9       | 40.5       |
| Government debt                      | (million euro) | 1 742      | 1 830      | 2 220      | 2 493      |
|                                      | % of GDP       | 6.3        | 6.1        | 6.6        | 6.8        |
| <b>Hungary</b>                       |                |            |            |            |            |
| GDP mp                               | (million HUF)  | 20 717 110 | 22 055 093 | 23 757 230 | 25 373 909 |
| Government deficit (-) / surplus (+) | (million HUF)  | -1 336 355 | -1 715 713 | -2 191 508 | -1 394 283 |
|                                      | % of GDP       | -6.5       | -7.8       | -9.2       | -5.5       |
| Government expenditure               | % of GDP       | 48.9       | 49.9       | 51.9       | 50.1       |
| Government revenue                   | % of GDP       | 42.4       | 42.1       | 42.6       | 44.6       |
| Government debt                      | (million HUF)  | 12 296 209 | 13 582 512 | 15 592 502 | 16 735 489 |
|                                      | % of GDP       | 59.4       | 61.6       | 65.6       | 66.0       |
| <b>Malta</b>                         |                |            |            |            |            |
| GDP mp                               | (million euro) | 4 475      | 4 763      | 5 067      | 5 377      |
| Government deficit (-) / surplus (+) | (million euro) | -208       | -141       | -129       | -96        |
|                                      | % of GDP       | -4.6       | -3.0       | -2.6       | -1.8       |
| Government expenditure               | % of GDP       | 45.8       | 45.0       | 43.9       | 42.5       |
| Government revenue                   | % of GDP       | 41.1       | 42.1       | 41.3       | 40.7       |
| Government debt                      | (million euro) | 3 249      | 3 355      | 3 253      | 3 368      |
|                                      | % of GDP       | 72.6       | 70.4       | 64.2       | 62.6       |
| <b>Netherlands</b>                   |                |            |            |            |            |
| GDP mp                               | (million euro) | 491 184    | 508 964    | 534 324    | 559 537    |
| Government deficit (-) / surplus (+) | (million euro) | -8 584     | -1 389     | 2 731      | 2 221      |
|                                      | % of GDP       | -1.7       | -0.3       | 0.5        | 0.4        |
| Government expenditure               | % of GDP       | 46.1       | 45.2       | 46.1       | 45.9       |
| Government revenue                   | % of GDP       | 44.3       | 44.9       | 46.6       | 46.3       |
| Government debt                      | (million euro) | 257 604    | 266 221    | 255 831    | 253 818    |
|                                      | % of GDP       | 52.4       | 52.3       | 47.9       | 45.4       |
| <b>Austria</b>                       |                |            |            |            |            |
| GDP mp                               | (million euro) | 236 149    | 245 330    | 257 897    | 272 766    |
| Government deficit (-) / surplus (+) | (million euro) | -8 825     | -3 614     | -3 858     | -1 459     |
|                                      | % of GDP       | -3.7       | -1.5       | -1.5       | -0.5       |
| Government expenditure               | % of GDP       | 52.6       | 49.7       | 49.2       | 48.2       |
| Government revenue                   | % of GDP       | 48.8       | 48.1       | 47.6       | 47.5       |
| Government debt                      | (million euro) | 150 771    | 155 670    | 159 457    | 161 328    |
|                                      | % of GDP       | 63.8       | 63.5       | 61.8       | 59.1       |
| <b>Poland</b>                        |                |            |            |            |            |
| GDP mp                               | (million PLN)  | 924 538    | 983 302    | 1 060 194  | 1 166 721  |
| Government deficit (-) / surplus (+) | (million PLN)  | -52 685    | -42 519    | -40 163    | -23 697    |
|                                      | % of GDP       | -5.7       | -4.3       | -3.8       | -2.0       |
| Government expenditure               | % of GDP       | 42.6       | 43.3       | 43.8       | 42.4       |
| Government revenue                   | % of GDP       | 36.9       | 39.0       | 40.0       | 40.4       |
| Government debt                      | (million PLN)  | 422 386    | 462 742    | 505 149    | 527 520    |
|                                      | % of GDP       | 45.7       | 47.1       | 47.6       | 45.2       |
| <b>Portugal</b>                      |                |            |            |            |            |
| GDP mp                               | (million euro) | 144 128    | 149 124    | 155 278    | 162 919    |
| Government deficit (-) / surplus (+) | (million euro) | -4 844     | -9 096     | -6 030     | -4 257     |
|                                      | % of GDP       | -3.4       | -6.1       | -3.9       | -2.6       |
| Government expenditure               | % of GDP       | 46.5       | 47.6       | 46.3       | 45.8       |
| Government revenue                   | % of GDP       | 43.1       | 41.6       | 42.4       | 43.1       |
| Government debt                      | (million euro) | 84 033     | 94 792     | 100 522    | 103 552    |
|                                      | % of GDP       | 58.3       | 63.6       | 64.7       | 63.6       |

**GDP, government deficit/surplus and debt in the EU (in national currencies)**

|                                                |                      | 2004             | 2005             | 2006             | 2007             |
|------------------------------------------------|----------------------|------------------|------------------|------------------|------------------|
| <b>Romania</b>                                 |                      |                  |                  |                  |                  |
| GDP mp                                         | (million RON)        | 246 469          | 288 176          | 344 536          | 404 709          |
| Government deficit (-) / surplus (+)           | (million RON)        | -3 015           | -3 544           | -7 646           | -9 993           |
|                                                | % of GDP             | -1.2             | -1.2             | -2.2             | -2.5             |
| Government expenditure                         | % of GDP             | 33.6             | 33.5             | 35.3             | 36.9             |
| Government revenue                             | % of GDP             | 32.4             | 32.3             | 33.1             | 34.4             |
| Government debt                                | (million RON)        | 46 357           | 45 626           | 42 583           | 52 411           |
|                                                | % of GDP             | 18.8             | 15.8             | 12.4             | 13.0             |
| <b>Slovenia</b>                                |                      |                  |                  |                  |                  |
| GDP mp                                         | (million euro)       | 26 677           | 28 243           | 30 448           | 33 542           |
| Government deficit (-) / surplus (+)           | (million euro)       | -601             | -412             | -377             | -24              |
|                                                | % of GDP             | -2.3             | -1.5             | -1.2             | -0.1             |
| Government expenditure                         | % of GDP             | 46.5             | 46.0             | 45.3             | 43.3             |
| Government revenue                             | % of GDP             | 44.2             | 44.5             | 44.1             | 43.2             |
| Government debt                                | (million euro)       | 7 356            | 7 755            | 8 289            | 8 071            |
|                                                | % of GDP             | 27.6             | 27.5             | 27.2             | 24.1             |
| <b>Slovakia</b>                                |                      |                  |                  |                  |                  |
| GDP mp                                         | (million SKK)        | 1 361 683        | 1 485 301        | 1 659 573        | 1 851 787        |
| Government deficit (-) / surplus (+)           | (million SKK)        | -32 129          | -41 628          | -59 944          | -40 023          |
|                                                | % of GDP             | -2.4             | -2.8             | -3.6             | -2.2             |
| Government expenditure                         | % of GDP             | 37.8             | 38.1             | 37.2             | 36.9             |
| Government revenue                             | % of GDP             | 35.4             | 35.3             | 33.5             | 34.7             |
| Government debt                                | (million SKK)        | 564 151          | 507 525          | 505 199          | 543 851          |
|                                                | % of GDP             | 41.4             | 34.2             | 30.4             | 29.4             |
| <b>Finland</b>                                 |                      |                  |                  |                  |                  |
| GDP mp                                         | (million euro)       | 152 345          | 157 335          | 167 041          | 178 759          |
| Government deficit (-) / surplus (+)           | (million euro)       | 3 625            | 4 501            | 6 875            | 9 511            |
|                                                | % of GDP             | 2.4              | 2.9              | 4.1              | 5.3              |
| Government expenditure                         | % of GDP             | 50.2             | 50.4             | 48.9             | 47.5             |
| Government revenue                             | % of GDP             | 52.4             | 53.1             | 52.9             | 52.7             |
| Government debt                                | (million euro)       | 67 242           | 65 053           | 65 536           | 63 196           |
|                                                | % of GDP             | 44.1             | 41.3             | 39.2             | 35.4             |
| <b>Sweden</b>                                  |                      |                  |                  |                  |                  |
| GDP mp                                         | (million SEK)        | 2 624 964        | 2 735 218        | 2 899 653        | 3 073 832        |
| Government deficit (-) / surplus (+)           | (million SEK)        | 20 562           | 60 812           | 66 961           | 106 086          |
|                                                | % of GDP             | 0.8              | 2.2              | 2.3              | 3.5              |
| Government expenditure                         | % of GDP             | 55.6             | 55.2             | 54.3             | 52.6             |
| Government revenue                             | % of GDP             | 56.1             | 57.2             | 56.5             | 56.0             |
| Government debt                                | (million SEK)        | 1 344 621        | 1 392 833        | 1 331 062        | 1 246 670        |
|                                                | % of GDP             | 51.2             | 50.9             | 45.9             | 40.6             |
| <b>United Kingdom*</b>                         |                      |                  |                  |                  |                  |
| GDP mp                                         | (million GBP)        | 1 206 659        | 1 257 112        | 1 329 029        | 1 412 565        |
| Government deficit (-) / surplus (+)           | (million GBP)        | -41 015          | -43 150          | -33 933          | -40 410          |
|                                                | % of GDP             | -3.4             | -3.4             | -2.6             | -2.9             |
| Government expenditure                         | % of GDP             | 42.6             | 44.0             | 43.9             | 43.7             |
| Government revenue                             | % of GDP             | 39.2             | 40.7             | 41.4             | 40.9             |
| Government debt                                | (million GBP)        | 487 860          | 529 367          | 573 339          | 618 824          |
|                                                | % of GDP             | 40.4             | 42.1             | 43.1             | 43.8             |
| <i>Financial year (fy)</i>                     |                      |                  |                  |                  |                  |
| <i>GDP mp fy</i>                               | <i>(million GBP)</i> | <i>1 157 557</i> | <i>1 218 260</i> | <i>1 273 237</i> | <i>1 350 992</i> |
| <i>Government deficit (-) / surplus (+) fy</i> | <i>(million GBP)</i> | <i>-37 415</i>   | <i>-42 671</i>   | <i>-39 295</i>   | <i>-35 030</i>   |
|                                                | <i>% of GDP</i>      | <i>-3.2</i>      | <i>-3.5</i>      | <i>-3.1</i>      | <i>-2.6</i>      |
| <i>Government debt fy</i>                      | <i>(million GBP)</i> | <i>446 347</i>   | <i>483 806</i>   | <i>531 480</i>   | <i>574 303</i>   |
|                                                | <i>% of GDP</i>      | <i>38.6</i>      | <i>39.7</i>      | <i>41.7</i>      | <i>42.5</i>      |

\* Data refer to calendar years. Data referring to the financial year (1 April to 31 March), are shown in italics. For the United Kingdom, the relevant data for implementation of the excessive deficit procedure are financial year data.

## Annex I

### Main revisions between the October 2007 and April 2008 notifications

Below are shown country specific explanations for the largest revisions in deficit and debt for 2004-2006 between the October 2007 and April 2008 notifications, as well as in GDP and in deficit and debt ratios (see table below).

#### Deficit

**Bulgaria:** The decrease in the surplus for 2004-2006 is due to the elimination of other accounts receivable relating to taxes, resulting from a change in the method of recording (to a cash method), in line with Eurostat advice, as well as to accounting, as expenditure, cancellations of debt towards third countries.

**Czech Republic:** The decrease in the deficit for 2006 is mainly due to a revision of income taxes.

**Denmark:** The increase in the surplus for the years 2005-2006 is mainly due to revised data for corporate and personal income tax revenue, as well as to revisions of intermediate consumption and investment for year 2006.

**Estonia:** The decrease in the surplus for 2004-2006 is due to the reclassification of a real estate company (Riigi Kinnisvara), hospitals, and a number of foundations at the level of local government, in line with Eurostat advice.

**Ireland:** The increase in the surplus for 2005 relates to a decrease of the valuation of the Nursing Homes payment obligation of government.

**Italy:** The decrease in the deficit for 2006 is mainly due to a methodological change, in line with Eurostat advice, relating to a change in the time of recording of a VAT reimbursement by the Italian government in application of a court ruling (accounted as a "other capital transfer").

**Luxembourg:** The increase in the surplus for 2006 is due to updates in data sources, notably in local government.

**Malta:** The decrease in the deficit for 2004 is due to the availability of updated source data relating to one extra budgetary unit.

**Austria:** The increase in the deficit for 2004 of 2.6% of GDP is due to a reclassification of a debt write-off/assumption in connection with the reorganisation of the Austrian railways ÖBB.

**Romania:** The increase in the deficit for 2006 is due to new information on debt cancellation against third countries, partially compensated by the positive impact of revisions in some other government transactions. The decrease in the deficit for 2004 and 2005 is due to revisions relating to some specific government transactions.

**Finland:** The increase in the surplus for 2004-2006 is mainly due to the revision of the property income from mutual funds.

#### Debt

**Czech Republic:** The decrease in the debt for 2005 and 2006 is due to updated information on the valuation of foreign currency debt.

**Latvia:** The increase in the debt for 2004 is due to updated data sources on currency and deposits liabilities.

#### GDP

The GDP notified in April 2008 for EDP purposes was revised by a few Member States compared to that notified in October 2007 for the reporting period 2004-2006, most notably by **Sweden**. Changes in GDP affect deficit and debt ratios due to the denominator effect. See table below.



**Revisions in government deficit/surplus and government debt ratios**  
from the October 2007 to the April 2008 notifications

|                |                                                    | Deficit/surplus* |             |             | Debt        |             |             |
|----------------|----------------------------------------------------|------------------|-------------|-------------|-------------|-------------|-------------|
|                |                                                    | 2004             | 2005        | 2006        | 2004        | 2005        | 2006        |
| Belgium        | <b>Revision in deficit/surplus and debt ratios</b> | <b>0.0</b>       | <b>0.0</b>  | <b>-0.1</b> | <b>0.0</b>  | <b>-0.1</b> | <b>0.0</b>  |
|                | - due to revision of deficit/surplus or debt       | 0.0              | 0.0         | 0.0         | 0.0         | 0.0         | 0.0         |
|                | - due to revision of GDP                           | 0.0              | 0.0         | -0.1        | 0.0         | -0.1        | 0.0         |
| Bulgaria       | <b>Revision in deficit/surplus and debt ratios</b> | <b>-0.9</b>      | <b>-0.2</b> | <b>-0.2</b> | <b>0.0</b>  | <b>0.0</b>  | <b>-0.1</b> |
|                | - due to revision of deficit/surplus or debt       | -0.8             | -0.2        | -0.2        | 0.0         | 0.0         | 0.0         |
|                | - due to revision of GDP                           | -0.1             | 0.0         | 0.0         | 0.0         | 0.0         | -0.1        |
| Czech Republic | <b>Revision in deficit/surplus and debt ratios</b> | <b>0.0</b>       | <b>-0.1</b> | <b>0.2</b>  | <b>0.0</b>  | <b>-0.5</b> | <b>-0.7</b> |
|                | - due to revision of deficit/surplus or debt       | 0.0              | 0.0         | 0.3         | 0.0         | -0.5        | -0.7        |
|                | - due to revision of GDP                           | 0.0              | -0.1        | -0.1        | 0.0         | 0.0         | 0.0         |
| Denmark        | <b>Revision in deficit/surplus and debt ratios</b> | <b>0.0</b>       | <b>0.4</b>  | <b>0.2</b>  | <b>-0.2</b> | <b>0.1</b>  | <b>0.1</b>  |
|                | - due to revision of deficit/surplus or debt       | 0.0              | 0.4         | 0.2         | 0.0         | 0.0         | 0.1         |
|                | - due to revision of GDP                           | 0.0              | 0.0         | 0.0         | -0.2        | 0.1         | 0.0         |
| Germany        | <b>Revision in deficit/surplus and debt ratios</b> | <b>0.0</b>       | <b>0.0</b>  | <b>0.0</b>  | <b>0.0</b>  | <b>0.0</b>  | <b>0.1</b>  |
|                | - due to revision of deficit/surplus or debt       | 0.0              | 0.0         | 0.0         | 0.0         | 0.0         | 0.0         |
|                | - due to revision of GDP                           | 0.0              | 0.0         | 0.0         | 0.0         | 0.0         | 0.1         |
| Estonia        | <b>Revision in deficit/surplus and debt ratios</b> | <b>-0.2</b>      | <b>-0.1</b> | <b>-0.2</b> | <b>0.0</b>  | <b>0.1</b>  | <b>0.2</b>  |
|                | - due to revision of deficit/surplus or debt       | -0.2             | -0.2        | -0.2        | 0.1         | 0.1         | 0.2         |
|                | - due to revision of GDP                           | 0.0              | 0.1         | 0.0         | -0.1        | 0.0         | 0.0         |
| Ireland        | <b>Revision in deficit/surplus and debt ratios</b> | <b>0.1</b>       | <b>0.4</b>  | <b>0.1</b>  | <b>0.0</b>  | <b>0.0</b>  | <b>0.0</b>  |
|                | - due to revision of deficit/surplus or debt       | 0.0              | 0.4         | 0.1         | 0.0         | 0.0         | 0.0         |
|                | - due to revision of GDP                           | 0.1              | 0.0         | 0.0         | 0.0         | 0.0         | 0.0         |
| Greece         | <b>Revision in deficit/surplus and debt ratios</b> | <b>-0.1</b>      | <b>0.0</b>  | <b>-0.1</b> | <b>0.0</b>  | <b>0.0</b>  | <b>0.0</b>  |
|                | - due to revision of deficit/surplus or debt       | -0.1             | -0.1        | -0.1        | 0.0         | 0.0         | 0.0         |
|                | - due to revision of GDP                           | 0.0              | 0.1         | 0.0         | 0.0         | 0.0         | 0.0         |
| Spain          | <b>Revision in deficit/surplus and debt ratios</b> | <b>0.0</b>       | <b>0.0</b>  | <b>0.0</b>  | <b>0.0</b>  | <b>0.0</b>  | <b>0.0</b>  |
|                | - due to revision of deficit/surplus or debt       | 0.0              | 0.0         | 0.0         | 0.0         | 0.0         | 0.0         |
|                | - due to revision of GDP                           | 0.0              | 0.0         | 0.0         | 0.0         | 0.0         | 0.0         |
| France         | <b>Revision in deficit/surplus and debt ratios</b> | <b>0.0</b>       | <b>0.0</b>  | <b>0.1</b>  | <b>0.0</b>  | <b>-0.3</b> | <b>-0.6</b> |
|                | - due to revision of deficit/surplus or debt       | 0.0              | 0.0         | 0.2         | 0.0         | 0.0         | 0.0         |
|                | - due to revision of GDP                           | 0.0              | 0.0         | -0.1        | 0.0         | -0.3        | -0.6        |
| Italy          | <b>Revision in deficit/surplus and debt ratios</b> | <b>0.0</b>       | <b>0.0</b>  | <b>1.0</b>  | <b>0.0</b>  | <b>-0.4</b> | <b>-0.3</b> |
|                | - due to revision of deficit/surplus or debt       | 0.0              | -0.1        | 1.1         | 0.1         | 0.0         | 0.0         |
|                | - due to revision of GDP                           | 0.0              | 0.1         | -0.1        | -0.1        | -0.4        | -0.3        |
| Cyprus         | <b>Revision in deficit/surplus and debt ratios</b> | <b>0.0</b>       | <b>0.0</b>  | <b>0.0</b>  | <b>0.0</b>  | <b>0.0</b>  | <b>-0.4</b> |
|                | - due to revision of deficit/surplus or debt       | 0.0              | 0.0         | 0.0         | 0.0         | 0.0         | 0.0         |
|                | - due to revision of GDP                           | 0.0              | 0.0         | 0.0         | 0.0         | 0.0         | -0.4        |
| Latvia         | <b>Revision in deficit/surplus and debt ratios</b> | <b>0.0</b>       | <b>0.0</b>  | <b>0.1</b>  | <b>0.4</b>  | <b>-0.1</b> | <b>0.1</b>  |
|                | - due to revision of deficit/surplus or debt       | 0.0              | 0.0         | 0.1         | 0.4         | -0.1        | 0.0         |
|                | - due to revision of GDP                           | 0.0              | 0.0         | 0.0         | 0.0         | 0.0         | 0.1         |
| Lithuania      | <b>Revision in deficit/surplus and debt ratios</b> | <b>0.0</b>       | <b>0.0</b>  | <b>0.1</b>  | <b>0.0</b>  | <b>0.0</b>  | <b>0.0</b>  |
|                | - due to revision of deficit/surplus or debt       | 0.0              | 0.0         | 0.1         | 0.0         | 0.0         | 0.0         |
|                | - due to revision of GDP                           | 0.0              | 0.0         | 0.0         | 0.0         | 0.0         | 0.0         |
| Luxembourg     | <b>Revision in deficit/surplus and debt ratios</b> | <b>0.0</b>       | <b>0.0</b>  | <b>0.6</b>  | <b>-0.1</b> | <b>-0.1</b> | <b>0.0</b>  |
|                | - due to revision of deficit/surplus or debt       | 0.0              | 0.0         | 0.6         | -0.1        | -0.1        | -0.1        |
|                | - due to revision of GDP                           | 0.0              | 0.0         | 0.0         | 0.0         | 0.0         | 0.1         |
| Hungary        | <b>Revision in deficit/surplus and debt ratios</b> | <b>0.0</b>       | <b>0.0</b>  | <b>0.0</b>  | <b>0.0</b>  | <b>0.0</b>  | <b>0.0</b>  |
|                | - due to revision of deficit/surplus or debt       | 0.0              | 0.0         | 0.0         | 0.0         | 0.0         | 0.0         |
|                | - due to revision of GDP                           | 0.0              | 0.0         | 0.0         | 0.0         | 0.0         | 0.0         |

\* Revisions to deficit/surplus ratios: a positive sign means an improved government balance relative to GDP, and a negative sign a worsening.

**Revisions in government deficit/surplus and government debt ratios**  
from the October 2007 to the April 2008 notifications

|                       |                                                    | Deficit/surplus* |             |             | Debt        |             |             |
|-----------------------|----------------------------------------------------|------------------|-------------|-------------|-------------|-------------|-------------|
|                       |                                                    | 2004             | 2005        | 2006        | 2004        | 2005        | 2006        |
| <b>Malta</b>          | <b>Revision in deficit/surplus and debt ratios</b> | <b>0.3</b>       | <b>0.1</b>  | <b>-0.1</b> | <b>-0.1</b> | <b>-0.4</b> | <b>-0.5</b> |
|                       | - due to revision of deficit/surplus or debt       | 0.2              | 0.1         | 0.0         | 0.0         | 0.0         | 0.0         |
|                       | - due to revision of GDP                           | 0.1              | 0.0         | -0.1        | -0.1        | -0.4        | -0.5        |
| <b>Netherlands</b>    | <b>Revision in deficit/surplus and debt ratios</b> | <b>0.0</b>       | <b>0.0</b>  | <b>-0.1</b> | <b>0.0</b>  | <b>0.0</b>  | <b>0.0</b>  |
|                       | - due to revision of deficit/surplus or debt       | 0.0              | 0.0         | -0.1        | 0.0         | 0.0         | 0.0         |
|                       | - due to revision of GDP                           | 0.0              | 0.0         | 0.0         | 0.0         | 0.0         | 0.0         |
| <b>Austria</b>        | <b>Revision in deficit/surplus and debt ratios</b> | <b>-2.5</b>      | <b>0.1</b>  | <b>-0.1</b> | <b>0.0</b>  | <b>0.1</b>  | <b>0.1</b>  |
|                       | - due to revision of deficit/surplus or debt       | -2.6             | 0.1         | -0.1        | 0.1         | 0.1         | 0.2         |
|                       | - due to revision of GDP                           | 0.1              | 0.0         | 0.0         | -0.1        | 0.0         | -0.1        |
| <b>Poland</b>         | <b>Revision in deficit/surplus and debt ratios</b> | <b>0.0</b>       | <b>0.0</b>  | <b>0.0</b>  | <b>0.0</b>  | <b>0.0</b>  | <b>0.0</b>  |
|                       | - due to revision of deficit/surplus or debt       | 0.0              | 0.0         | 0.0         | 0.0         | 0.0         | 0.0         |
|                       | - due to revision of GDP                           | 0.0              | 0.0         | 0.0         | 0.0         | 0.0         | 0.0         |
| <b>Portugal</b>       | <b>Revision in deficit/surplus and debt ratios</b> | <b>0.0</b>       | <b>0.0</b>  | <b>0.0</b>  | <b>0.0</b>  | <b>-0.1</b> | <b>-0.1</b> |
|                       | - due to revision of deficit/surplus or debt       | 0.0              | 0.0         | 0.0         | 0.0         | 0.0         | 0.0         |
|                       | - due to revision of GDP                           | 0.0              | 0.0         | 0.0         | 0.0         | -0.1        | -0.1        |
| <b>Romania</b>        | <b>Revision in deficit/surplus and debt ratios</b> | <b>0.3</b>       | <b>0.2</b>  | <b>-0.3</b> | <b>0.0</b>  | <b>0.0</b>  | <b>0.0</b>  |
|                       | - due to revision of deficit/surplus or debt       | 0.3              | 0.1         | -0.4        | 0.0         | 0.0         | 0.0         |
|                       | - due to revision of GDP                           | 0.0              | 0.1         | 0.1         | 0.0         | 0.0         | 0.0         |
| <b>Slovenia</b>       | <b>Revision in deficit/surplus and debt ratios</b> | <b>0.0</b>       | <b>0.0</b>  | <b>0.0</b>  | <b>0.0</b>  | <b>0.1</b>  | <b>0.1</b>  |
|                       | - due to revision of deficit/surplus or debt       | 0.0              | 0.0         | 0.0         | 0.0         | 0.1         | 0.1         |
|                       | - due to revision of GDP                           | 0.0              | 0.0         | 0.0         | 0.0         | 0.0         | 0.0         |
| <b>Slovakia</b>       | <b>Revision in deficit/surplus and debt ratios</b> | <b>0.0</b>       | <b>0.0</b>  | <b>0.1</b>  | <b>0.0</b>  | <b>0.0</b>  | <b>0.0</b>  |
|                       | - due to revision of deficit/surplus or debt       | 0.0              | 0.0         | 0.1         | 0.0         | 0.0         | 0.0         |
|                       | - due to revision of GDP                           | 0.0              | 0.0         | 0.0         | 0.0         | 0.0         | 0.0         |
| <b>Finland</b>        | <b>Revision in deficit/surplus and debt ratios</b> | <b>0.1</b>       | <b>0.2</b>  | <b>0.3</b>  | <b>0.0</b>  | <b>-0.1</b> | <b>0.0</b>  |
|                       | - due to revision of deficit/surplus or debt       | 0.1              | 0.1         | 0.3         | 0.0         | 0.0         | 0.0         |
|                       | - due to revision of GDP                           | 0.0              | 0.1         | 0.0         | 0.0         | -0.1        | 0.0         |
| <b>Sweden</b>         | <b>Revision in deficit/surplus and debt ratios</b> | <b>0.0</b>       | <b>-0.2</b> | <b>-0.2</b> | <b>-1.2</b> | <b>-1.3</b> | <b>-1.1</b> |
|                       | - due to revision of deficit/surplus or debt       | 0.0              | -0.1        | -0.1        | 0.0         | 0.0         | 0.0         |
|                       | - due to revision of GDP                           | 0.0              | -0.1        | -0.1        | -1.2        | -1.3        | -1.1        |
| <b>United Kingdom</b> | <b>Revision in deficit/surplus and debt ratios</b> | <b>0.0</b>       | <b>-0.1</b> | <b>0.1</b>  | <b>0.0</b>  | <b>0.0</b>  | <b>-0.1</b> |
|                       | - due to revision of deficit/surplus or debt       | 0.0              | -0.1        | 0.1         | 0.0         | 0.0         | 0.0         |
|                       | - due to revision of GDP                           | 0.0              | 0.0         | 0.0         | 0.0         | 0.0         | -0.1        |

\* Revisions to deficit/surplus ratios: a positive sign means an improved government balance relative to GDP, and a negative sign a worsening.
