# Supplementary material
Source: publisher figshare collection journal article supplement (https://tandf.figshare.com/articles/dataset/_/4793563)
Supplement: Supplementary file 12 [file 1]

Provision of deficit and debt data for 2006

## Euro area and EU27 government deficit at 1.5% and 1.6% of GDP respectively

Government debt at 68.6% and 61.4%

In 2006, the government deficit<sup>1</sup> of both the **euro area**<sup>2</sup> (EA13) and the **EU27** fell compared to 2005, while the government debt<sup>1</sup> increased in absolute terms. In the **euro area** the government deficit decreased from 2.5% of GDP in 2005 to 1.5% in 2006<sup>3</sup>, and in the **EU27** it fell from 2.4% to 1.6%. In the **euro area** the government debt to GDP ratio fell from 70.3% at the end of 2005 to 68.6% at the end of 2006, and in the **EU27** from 62.7% to 61.4%.

|                                      |                | 2003       | 2004       | 2005       | 2006       |
|--------------------------------------|----------------|------------|------------|------------|------------|
| <b>Euro area (EA13)</b>              |                |            |            |            |            |
| GDP market prices (mp)               | (million euro) | 7 500 988  | 7 804 371  | 8 074 684  | 8 454 544  |
| Government deficit (-) / surplus (+) | (million euro) | -229 355   | -219 253   | -202 229   | -129 171   |
|                                      | % of GDP       | -3.1       | -2.8       | -2.5       | -1.5       |
| Government expenditure               | % of GDP       | 48.1       | 47.5       | 47.4       | 47.2       |
| Government revenue                   | % of GDP       | 45.0       | 44.6       | 45.0       | 45.6       |
| Government debt                      | (million euro) | 5 186 542  | 5 427 970  | 5 677 221  | 5 801 886  |
|                                      | % of GDP       | 69.1       | 69.6       | 70.3       | 68.6       |
| <b>EU27</b>                          |                |            |            |            |            |
| GDP market prices (mp)               | (million euro) | 10 104 261 | 10 605 311 | 11 045 938 | 11 642 686 |
| Government deficit (-) / surplus (+) | (million euro) | -312 460   | -294 997   | -270 252   | -188 249   |
|                                      | % of GDP       | -3.1       | -2.8       | -2.4       | -1.6       |
| Government expenditure               | % of GDP       | 47.3       | 46.8       | 46.8       | 46.6       |
| Government revenue                   | % of GDP       | 44.2       | 44.0       | 44.4       | 45.0       |
| Government debt                      | (million euro) | 6 240 795  | 6 588 090  | 6 929 011  | 7 151 270  |
|                                      | % of GDP       | 61.8       | 62.1       | 62.7       | 61.4       |

In 2006 the largest government deficits in percentage of GDP were recorded by **Hungary** (-9.2%), **Italy** (-4.4%), **Portugal** (-3.9%), **Poland** (-3.8%), and **Slovakia** (-3.7%). Ten Member States registered a government surplus in 2006: **Denmark** (+4.6%), **Finland** (+3.8%), **Estonia** (+3.6%), **Bulgaria** (+3.2%), **Ireland** (+2.9%), **Sweden** (+2.5%), **Spain** (+1.8%), **Luxembourg** (+0.7%), **Netherlands** (+0.6%) and **Belgium** (+0.4%). In all, 21 Member States recorded an improved government balance relative to GDP in 2006 compared to 2005, five a worsening, and one remained unchanged.

At the end of 2006, the lowest ratios of government debt to GDP were recorded in **Estonia** (4.0%), **Luxembourg** (6.6%), **Latvia** (10.6%) and **Romania** (12.4%). Ten Member States had government debt ratios higher than 60% of GDP in 2006: **Italy** (106.8%), **Greece** (95.3%), **Belgium** (88.2%), **Germany** (67.5%), **Hungary** (65.6%), **Cyprus** (65.2%), **Portugal** (64.8%), **Malta** (64.7%), **France** (64.2%) and **Austria** (61.7%).

In 2006, government expenditure<sup>4</sup> in the **euro area** was equivalent to 47.2% of GDP, and government revenue<sup>4</sup> to 45.6%. The figures for the **EU27** were 46.6% and 45.0% respectively. In both zones between 2005 and 2006, the government expenditure ratio decreased slightly, while the government revenue ratio increased.

## Reservations on reported data<sup>5</sup>

Eurostat has no reservations on the reported data.

## Amendments by Eurostat to reported data<sup>6</sup>

**Belgium:** Eurostat has amended the deficit and debt data notified by Belgium for 2005 and 2006 in relation to the assumption by government (FIF – Fonds de l'infrastructure ferroviaire) in 2005 of 7400 million euro (2.5% of GDP) of the debt of the railway company SNCB. According to ESA95 rules, FIF is classified inside the government sector and the debt assumption is recorded as increasing the deficit. The impact on the government balance in 2005 is of -7073.4 million euro and in 2006 of +227.9 million euro; the impact on the government debt at the end of 2005 amounts to 5246 million euro (1.7% of GDP) and at the end of 2006 to 4982 million euro (1.6% of GDP).

**United Kingdom:** Eurostat has amended the deficit data notified by the United Kingdom for years 2003 to 2006 for consistency of recording of UMTS licences proceeds. This leads to increase in the government deficit in 2003 and 2006 (as well as for financial year 2003/2004 and 2006/2007) by GBP 1045 mn (0.1% of GDP) and in 2004 and 2005 (financial years 2004/2005 and 2005/2006) by GBP 1044 mn (0.1% of GDP). There is no change in the reported debt figures.

## Other issues

**Greece** notified in 2006 a substantial upwards revision of GDP (around 26%). This revision has in the last year been subject to a detailed scrutiny by Eurostat and national experts from various Member States, following recommendations from the Gross National Income Committee. As a result of this work, Greece has now notified a substantially smaller revision of GDP (around 9.6%). The new notified series are being used for the purpose of this provision of deficit and debt data.

As far as other horizontal issues are concerned, Eurostat intends in the coming months to further clarify the accounting treatment of flows and debt relating to public infrastructure investments, as well as the sector classification of the concerned public units.

## Background

In this News Release **Eurostat, the Statistical Office of the European Communities**, is providing<sup>7</sup> government deficit and debt data based on figures reported in the **second 2007 notification** by EU Member States for the years 2003-2006, for the application of the excessive deficit procedure (EDP). This notification is based on the ESA95 system of national accounts. This News Release also includes data on government expenditure and revenue and an annex with the main revision since the April 2007 News Release.

Eurostat will also be releasing information on the underlying government sector accounts, as well as on the contribution of deficit/surplus and other relevant factors to the variation in the debt level (stock-flow adjustment), on the government finance statistics section on its website:

[http://epp.eurostat.ec.europa.eu/pls/portal/url/page/PGP\\_DS\\_GFS/PGE\\_DS\\_GFS\\_0](http://epp.eurostat.ec.europa.eu/pls/portal/url/page/PGP_DS_GFS/PGE_DS_GFS_0)

1. According to the Protocol on the excessive deficit procedure annexed to the EC Treaty, government deficit (surplus) means the net borrowing (net lending) of the whole general government sector (central government, state government, local government and social security funds). It is calculated according to national accounts concepts (European System of Accounts, ESA95). Government debt is the consolidated gross debt of the whole general government sector outstanding at the end of the year (at nominal value).
  - Table of euro area and EU27 aggregates: the data are in euro. For those countries not belonging to the euro area, the rate of conversion into euro is as follows:
    - for deficit / surplus and GDP data, the annual average exchange rate;
    - for the stock of government debt, the end of year exchange rate.
  - Table of national data: these are in national currencies. For Slovenia, data for years prior to 2007 have been converted into euro according to the irrevocable conversion rate.
2. Euro area (EA13): Belgium, Germany, Greece, Spain, France, Ireland, Italy, Luxembourg, Netherlands, Austria, Portugal, Slovenia and Finland. In the attached tables, the euro area is defined as including Slovenia for the full period, though Slovenia joined the euro area on 1 January 2007.
3. In the previous notification, the 2006 government deficits for the euro area and the EU27 were 1.6% and 1.7% of GDP respectively. The government debt of the euro area was 69.0% of GDP and of the EU27 61.7% of GDP. See News Release 55/2007 of 23 April 2007.
4. Government expenditure and revenue are reported to Eurostat under the ESA95 transmission programme. They are the sum of non-financial transactions by general government, and include both current and capital transactions. For definitions, see Council Regulation No. 2223/96, as amended. It should be noted that the government balance (i.e. the difference between total government revenue and expenditure) is not the exactly the same under ESA95 as that for the purpose of the excessive deficit procedure. Regulation (EC) No 2558/2001 on the reclassification of settlements under swaps agreements and forward rate agreements implies that there are two relevant definitions of government deficit/surplus:

- The ESA95 definition of net lending /net borrowing does not include streams of payments and receipts resulting from swap agreements and forward rate agreements, as these are recorded as financial transaction;
- For the purpose of the excessive deficit procedure, streams of payments and receipts resulting from swaps and forward rate agreements are recorded as interest expenditure and contribute to the net lending/net borrowing of general government.

Concerning 2006, for most Member States the difference, if any, between the two balances is minor except in **Greece** (0.26%), **Denmark** (0.14%), **Austria** (0.13%), **Sweden** (0.13%) and **Finland** (0.11%). These differences improve net lending/net borrowing for EDP purposes for all these countries.

The data reported by **Sweden** are not strictly comparable to those of the other countries, as Sweden reports interest on an unconsolidated basis, which results in an overestimation of government revenue and expenditure; however, this has no consequences on the government balance and debt.

5. The term "reservations" is defined in article 8h(1) of Council Regulation 3605/93, as amended. The Commission (Eurostat) expresses reservations when it has doubts on the quality of the reported data.
6. According to Article 8h(2) of Council Regulation 3605/93 as amended, the Commission (Eurostat) may amend actual data reported by Member States and provide the amended data and a justification of the amendment where there is evidence that actual data reported by Member States do not comply with the quality requirements (compliance with accounting rules, completeness, reliability, timeliness and consistency of statistical data).
7. According to Article 8g(1) of Council Regulation 3605/93, Eurostat provides the actual government deficit and debt data for the application of the Protocol on the excessive deficit procedure, within three weeks after the reporting deadlines. This provision of data shall be effected through publication.

*For further information on the methodology of statistics reported under the excessive deficit procedure, please see Council Regulation 3605/93 (consolidated version available at <http://eur-lex.europa.eu/LexUriServ/site/en/consleg/1993/R/01993R3605-20051223-en.pdf>), Council Regulation 2223/96, as amended (consolidated version available at <http://eur-lex.europa.eu/LexUriServ/site/en/consleg/1996/R/01996R2223-20030807-en.pdf>) and the Eurostat publication "**ESA95 manual on government deficit and debt**", second edition (2002), 240 pages, ISBN 92-894-3231-4, pdf file free of charge, paper copy 37 euro (excluding VAT). Additions to this manual on securitisation, capital injections, classification of funded pension schemes, lump sum payments to government in the context of the transfer of pension obligations, and long term contracts between government units and non-government partners are available in the government finance statistics section on the Eurostat website.*

Issued by:

**Eurostat Press Office**

**Tim ALLEN**

**Tel: +352-4301-33 444**

**[eurostat-pressoffice@ec.europa.eu](mailto:eurostat-pressoffice@ec.europa.eu)**

Eurostat news releases on the Internet:

**<http://ec.europa.eu/eurostat>**

Selected Principal European Economic Indicators:

**<http://ec.europa.eu/euroindicators>**

## GDP, government deficit/surplus and debt in the EU (in national currencies)

|                                      |                | 2003      | 2004      | 2005      | 2006      |
|--------------------------------------|----------------|-----------|-----------|-----------|-----------|
| <b>Belgium</b>                       |                |           |           |           |           |
| GDP mp                               | (million euro) | 274 726   | 289 690   | 301 966   | 316 622   |
| Government deficit (-) / surplus (+) | (million euro) | 41        | 39        | -6 846    | 1 143     |
|                                      | % of GDP       | 0.0       | 0.0       | -2.3      | 0.4       |
| Government expenditure*              | % of GDP       | 51.1      | 49.2      | 51.9      | 48.6      |
| Government revenue*                  | % of GDP       | 51.1      | 49.1      | 49.5      | 48.9      |
| Government debt                      | (million euro) | 270 965   | 273 026   | 278 273   | 279 236   |
|                                      | % of GDP       | 98.6      | 94.2      | 92.2      | 88.2      |
| <b>Bulgaria</b>                      |                |           |           |           |           |
| GDP mp                               | (million BGN)  | 34 627.5  | 38 822.6  | 42 797.4  | 49 090.6  |
| Government deficit (-) / surplus (+) | (million BGN)  | 2.4       | 880.4     | 853.3     | 1 592.1   |
|                                      | % of GDP       | 0.0       | 2.3       | 2.0       | 3.2       |
| Government expenditure               | % of GDP       | 40.3      | 39.7      | 39.6      | 37.1      |
| Government revenue                   | % of GDP       | 40.3      | 42.0      | 41.6      | 40.3      |
| Government debt                      | (million BGN)  | 15 893.0  | 14 720.4  | 12 498.0  | 11 189.2  |
|                                      | % of GDP       | 45.9      | 37.9      | 29.2      | 22.8      |
| <b>Czech Republic</b>                |                |           |           |           |           |
| GDP mp                               | (million CZK)  | 2 577 110 | 2 814 762 | 2 987 722 | 3 231 576 |
| Government deficit (-) / surplus (+) | (million CZK)  | -170 558  | -83 278   | -105 658  | -94 981   |
|                                      | % of GDP       | -6.6      | -3.0      | -3.5      | -2.9      |
| Government expenditure               | % of GDP       | 47.3      | 45.1      | 44.9      | 43.6      |
| Government revenue                   | % of GDP       | 40.7      | 42.2      | 41.3      | 40.7      |
| Government debt                      | (million CZK)  | 774 989   | 855 102   | 903 475   | 972 965   |
|                                      | % of GDP       | 30.1      | 30.4      | 30.2      | 30.1      |
| <b>Denmark</b>                       |                |           |           |           |           |
| GDP mp                               | (million DKK)  | 1 400 700 | 1 459 400 | 1 552 000 | 1 642 200 |
| Government deficit (-) / surplus (+) | (million DKK)  | -1 000    | 27 700    | 71 800    | 75 900    |
|                                      | % of GDP       | -0.1      | 1.9       | 4.6       | 4.6       |
| Government expenditure               | % of GDP       | 55.7      | 55.4      | 53.1      | 51.5      |
| Government revenue                   | % of GDP       | 55.6      | 57.3      | 57.8      | 56.2      |
| Government debt                      | (million DKK)  | 641 700   | 641 700   | 563 000   | 497 300   |
|                                      | % of GDP       | 45.8      | 44.0      | 36.3      | 30.3      |
| <b>Germany</b>                       |                |           |           |           |           |
| GDP mp                               | (million euro) | 2 163 800 | 2 211 200 | 2 244 600 | 2 322 200 |
| Government deficit (-) / surplus (+) | (million euro) | -87 220   | -83 550   | -75 350   | -36 960   |
|                                      | % of GDP       | -4.0      | -3.8      | -3.4      | -1.6      |
| Government expenditure               | % of GDP       | 48.5      | 47.1      | 46.9      | 45.4      |
| Government revenue                   | % of GDP       | 44.5      | 43.3      | 43.5      | 43.8      |
| Government debt                      | (million euro) | 1 381 007 | 1 451 108 | 1 521 496 | 1 568 487 |
|                                      | % of GDP       | 63.8      | 65.6      | 67.8      | 67.5      |
| <b>Estonia</b>                       |                |           |           |           |           |
| GDP mp                               | (million EEK)  | 136 010   | 149 923   | 175 392   | 207 061   |
| Government deficit (-) / surplus (+) | (million EEK)  | 2 494     | 2 678     | 3 360     | 7 381     |
|                                      | % of GDP       | 1.8       | 1.8       | 1.9       | 3.6       |
| Government expenditure               | % of GDP       | 34.6      | 34.1      | 33.4      | 33.0      |
| Government revenue                   | % of GDP       | 36.4      | 35.9      | 35.4      | 36.6      |
| Government debt                      | (million EEK)  | 7 548     | 7 609     | 7 698     | 8 301     |
|                                      | % of GDP       | 5.5       | 5.1       | 4.4       | 4.0       |
| <b>Ireland</b>                       |                |           |           |           |           |
| GDP mp                               | (million euro) | 139 413   | 148 502   | 161 498   | 174 705   |
| Government deficit (-) / surplus (+) | (million euro) | 541       | 2 000     | 1 935     | 5 107     |
|                                      | % of GDP       | 0.4       | 1.3       | 1.2       | 2.9       |
| Government expenditure               | % of GDP       | 33.4      | 33.9      | 34.2      | 34.2      |
| Government revenue                   | % of GDP       | 33.8      | 35.2      | 35.4      | 37.1      |
| Government debt                      | (million euro) | 43 322    | 43 849    | 44 229    | 43 771    |
|                                      | % of GDP       | 31.1      | 29.5      | 27.4      | 25.1      |

\* Belgium has reported government expenditure and revenue data without taking into account the assumption by government (FIF) in 2005 of 7 400 million euro of debt of the railway company SNCB. Eurostat has adjusted figures for 2005 and 2006 in order to follow ESA95 rules.

## GDP, government deficit/surplus and debt in the EU (in national currencies)

|                                      |                | 2003      | 2004      | 2005      | 2006      |
|--------------------------------------|----------------|-----------|-----------|-----------|-----------|
| <b>Greece</b>                        |                |           |           |           |           |
| GDP mp                               | (million euro) | 171 258   | 185 225   | 198 609   | 213 985   |
| Government deficit (-) / surplus (+) | (million euro) | -9 611    | -13 552   | -10 085   | -5 352    |
|                                      | % of GDP       | -5.6      | -7.3      | -5.1      | -2.5      |
| Government expenditure               | % of GDP       | 45.0      | 45.4      | 43.2      | 42.3      |
| Government revenue                   | % of GDP       | 39.3      | 38.2      | 38.0      | 39.5      |
| Government debt                      | (million euro) | 167 723   | 182 702   | 194 666   | 204 018   |
|                                      | % of GDP       | 97.9      | 98.6      | 98.0      | 95.3      |
| <b>Spain</b>                         |                |           |           |           |           |
| GDP mp                               | (million euro) | 782 929   | 841 042   | 908 450   | 980 954   |
| Government deficit (-) / surplus (+) | (million euro) | -1 622    | -2 862    | 8 759     | 17 942    |
|                                      | % of GDP       | -0.2      | -0.3      | 1.0       | 1.8       |
| Government expenditure               | % of GDP       | 38.4      | 38.9      | 38.5      | 38.6      |
| Government revenue                   | % of GDP       | 38.2      | 38.5      | 39.4      | 40.4      |
| Government debt                      | (million euro) | 381 562   | 388 372   | 390 926   | 389 124   |
|                                      | % of GDP       | 48.7      | 46.2      | 43.0      | 39.7      |
| <b>France</b>                        |                |           |           |           |           |
| GDP mp                               | (million euro) | 1 594 814 | 1 660 189 | 1 717 921 | 1 791 956 |
| Government deficit (-) / surplus (+) | (million euro) | -65 390   | -59 576   | -50 639   | -45 306   |
|                                      | % of GDP       | -4.1      | -3.6      | -2.9      | -2.5      |
| Government expenditure               | % of GDP       | 53.4      | 53.2      | 53.7      | 53.4      |
| Government revenue                   | % of GDP       | 49.2      | 49.6      | 50.7      | 50.8      |
| Government debt                      | (million euro) | 1 003 351 | 1 076 932 | 1 145 212 | 1 150 339 |
|                                      | % of GDP       | 62.9      | 64.9      | 66.7      | 64.2      |
| <b>Italy</b>                         |                |           |           |           |           |
| GDP mp                               | (million euro) | 1 335 354 | 1 390 539 | 1 423 048 | 1 475 401 |
| Government deficit (-) / surplus (+) | (million euro) | -46 614   | -48 066   | -59 523   | -65 504   |
|                                      | % of GDP       | -3.5      | -3.5      | -4.2      | -4.4      |
| Government expenditure               | % of GDP       | 48.3      | 47.7      | 48.3      | 50.1      |
| Government revenue                   | % of GDP       | 44.8      | 44.2      | 44.0      | 45.6      |
| Government debt                      | (million euro) | 1 392 389 | 1 443 395 | 1 511 198 | 1 575 441 |
|                                      | % of GDP       | 104.3     | 103.8     | 106.2     | 106.8     |
| <b>Cyprus</b>                        |                |           |           |           |           |
| GDP mp                               | (million CYP)  | 6 884     | 7 406     | 7 879     | 8 380     |
| Government deficit (-) / surplus (+) | (million CYP)  | -447      | -302      | -191      | -101      |
|                                      | % of GDP       | -6.5      | -4.1      | -2.4      | -1.2      |
| Government expenditure               | % of GDP       | 45.0      | 42.8      | 43.6      | 43.8      |
| Government revenue                   | % of GDP       | 38.5      | 38.7      | 41.2      | 42.6      |
| Government debt                      | (million CYP)  | 4 746     | 5 199     | 5 443     | 5 461     |
|                                      | % of GDP       | 68.9      | 70.2      | 69.1      | 65.2      |
| <b>Latvia</b>                        |                |           |           |           |           |
| GDP mp                               | (million LVL)  | 6 393     | 7 435     | 9 059     | 11 265    |
| Government deficit (-) / surplus (+) | (million LVL)  | -104      | -76       | -32       | -31       |
|                                      | % of GDP       | -1.6      | -1.0      | -0.4      | -0.3      |
| Government expenditure               | % of GDP       | 34.8      | 35.8      | 35.6      | 37.2      |
| Government revenue                   | % of GDP       | 33.2      | 34.7      | 35.2      | 37.0      |
| Government debt                      | (million LVL)  | 923       | 1 080     | 1 130     | 1 192     |
|                                      | % of GDP       | 14.4      | 14.5      | 12.5      | 10.6      |
| <b>Lithuania</b>                     |                |           |           |           |           |
| GDP mp                               | (million LTL)  | 56 804    | 62 587    | 71 380    | 81 905    |
| Government deficit (-) / surplus (+) | (million LTL)  | -728      | -964      | -362      | -483      |
|                                      | % of GDP       | -1.3      | -1.5      | -0.5      | -0.6      |
| Government expenditure               | % of GDP       | 33.2      | 33.4      | 33.6      | 34.0      |
| Government revenue                   | % of GDP       | 32.0      | 31.8      | 33.1      | 33.4      |
| Government debt                      | (million LTL)  | 12 039    | 12 155    | 13 276    | 14 939    |
|                                      | % of GDP       | 21.2      | 19.4      | 18.6      | 18.2      |

## GDP, government deficit/surplus and debt in the EU (in national currencies)

|                                      |                | 2003       | 2004       | 2005       | 2006       |
|--------------------------------------|----------------|------------|------------|------------|------------|
| <b>Luxembourg</b>                    |                |            |            |            |            |
| GDP mp                               | (million euro) | 25 726     | 27 439     | 30 032     | 33 853     |
| Government deficit (-) / surplus (+) | (million euro) | 127        | -326       | -33        | 234        |
|                                      | % of GDP       | 0.5        | -1.2       | -0.1       | 0.7        |
| Government expenditure               | % of GDP       | 41.9       | 42.5       | 41.8       | 39.0       |
| Government revenue                   | % of GDP       | 42.4       | 41.3       | 41.7       | 39.7       |
| Government debt                      | (million euro) | 1 612      | 1 770      | 1 865      | 2 242      |
|                                      | % of GDP       | 6.3        | 6.4        | 6.2        | 6.6        |
| <b>Hungary</b>                       |                |            |            |            |            |
| GDP mp                               | (million HUF)  | 18 940 742 | 20 717 110 | 22 055 093 | 23 757 230 |
| Government deficit (-) / surplus (+) | (million HUF)  | -1 365 187 | -1 336 355 | -1 715 713 | -2 188 165 |
|                                      | % of GDP       | -7.2       | -6.5       | -7.8       | -9.2       |
| Government expenditure               | % of GDP       | 49.1       | 48.9       | 49.9       | 51.9       |
| Government revenue                   | % of GDP       | 41.9       | 42.4       | 42.1       | 42.6       |
| Government debt                      | (million HUF)  | 10 981 849 | 12 296 209 | 13 582 512 | 15 592 502 |
|                                      | % of GDP       | 58.0       | 59.4       | 61.6       | 65.6       |
| <b>Malta</b>                         |                |            |            |            |            |
| GDP mp                               | (million MTL)  | 1 884      | 1 918      | 2 035      | 2 157      |
| Government deficit (-) / surplus (+) | (million MTL)  | -186       | -94        | -63        | -55        |
|                                      | % of GDP       | -9.9       | -4.9       | -3.1       | -2.5       |
| Government expenditure               | % of GDP       | 47.8       | 45.8       | 45.1       | 44.1       |
| Government revenue                   | % of GDP       | 37.9       | 41.0       | 42.0       | 41.5       |
| Government debt                      | (million MTL)  | 1 305      | 1 395      | 1 441      | 1 396      |
|                                      | % of GDP       | 69.3       | 72.7       | 70.8       | 64.7       |
| <b>Netherlands</b>                   |                |            |            |            |            |
| GDP mp                               | (million euro) | 476 945    | 491 184    | 508 964    | 534 324    |
| Government deficit (-) / surplus (+) | (million euro) | -14 871    | -8 584     | -1 350     | 3 036      |
|                                      | % of GDP       | -3.1       | -1.7       | -0.3       | 0.6        |
| Government expenditure               | % of GDP       | 47.1       | 46.1       | 45.2       | 46.1       |
| Government revenue                   | % of GDP       | 43.9       | 44.3       | 44.9       | 46.7       |
| Government debt                      | (million euro) | 248 009    | 257 604    | 266 221    | 255 831    |
|                                      | % of GDP       | 52.0       | 52.4       | 52.3       | 47.9       |
| <b>Austria</b>                       |                |            |            |            |            |
| GDP mp                               | (million euro) | 226 175    | 236 149    | 245 330    | 257 897    |
| Government deficit (-) / surplus (+) | (million euro) | -3 669     | -2 803     | -3 832     | -3 516     |
|                                      | % of GDP       | -1.6       | -1.2       | -1.6       | -1.4       |
| Government expenditure               | % of GDP       | 51.1       | 50.2       | 49.9       | 49.3       |
| Government revenue                   | % of GDP       | 49.3       | 48.9       | 48.2       | 47.8       |
| Government debt                      | (million euro) | 146 099    | 150 599    | 155 526    | 159 053    |
|                                      | % of GDP       | 64.6       | 63.8       | 63.4       | 61.7       |
| <b>Poland</b>                        |                |            |            |            |            |
| GDP mp                               | (million PLN)  | 843 156    | 924 538    | 983 302    | 1 060 194  |
| Government deficit (-) / surplus (+) | (million PLN)  | -52 832    | -52 685    | -42 519    | -40 163    |
|                                      | % of GDP       | -6.3       | -5.7       | -4.3       | -3.8       |
| Government expenditure               | % of GDP       | 44.6       | 42.6       | 43.3       | 43.8       |
| Government revenue                   | % of GDP       | 38.4       | 36.9       | 39.0       | 40.0       |
| Government debt                      | (million PLN)  | 396 731    | 422 386    | 462 742    | 505 153    |
|                                      | % of GDP       | 47.1       | 45.7       | 47.1       | 47.6       |
| <b>Portugal</b>                      |                |            |            |            |            |
| GDP mp                               | (million euro) | 138 582    | 144 128    | 148 852    | 155 131    |
| Government deficit (-) / surplus (+) | (million euro) | -4 028     | -4 844     | -9 146     | -6 030     |
|                                      | % of GDP       | -2.9       | -3.4       | -6.1       | -3.9       |
| Government expenditure               | % of GDP       | 45.5       | 46.5       | 47.7       | 46.4       |
| Government revenue                   | % of GDP       | 42.5       | 43.1       | 41.7       | 42.5       |
| Government debt                      | (million euro) | 78 798     | 84 019     | 94 812     | 100 563    |
|                                      | % of GDP       | 56.9       | 58.3       | 63.7       | 64.8       |

## GDP, government deficit/surplus and debt in the EU (in national currencies)

|                                                |                      | 2003             | 2004             | 2005             | 2006             |
|------------------------------------------------|----------------------|------------------|------------------|------------------|------------------|
| <b>Romania</b>                                 |                      |                  |                  |                  |                  |
| GDP mp                                         | (million RON)        | 197 565          | 246 469          | 288 048          | 342 418          |
| Government deficit (-) / surplus (+)           | (million RON)        | -2 952           | -3 722           | -3 970           | -6 379           |
|                                                | % of GDP             | -1.5             | -1.5             | -1.4             | -1.9             |
| Government expenditure                         | % of GDP             | 33.6             | 32.7             | 33.8             | 35.0             |
| Government revenue                             | % of GDP             | 32.1             | 31.2             | 32.4             | 33.2             |
| Government debt                                | (million RON)        | 42 432           | 46 341           | 45 595           | 42 563           |
|                                                | % of GDP             | 21.5             | 18.8             | 15.8             | 12.4             |
| <b>Slovenia</b>                                |                      |                  |                  |                  |                  |
| GDP mp                                         | (million euro)       | 24 716           | 26 677           | 28 243           | 30 448           |
| Government deficit (-) / surplus (+)           | (million euro)       | -672             | -601             | -412             | -366             |
|                                                | % of GDP             | -2.7             | -2.3             | -1.5             | -1.2             |
| Government expenditure                         | % of GDP             | 47.1             | 46.5             | 46.0             | 45.3             |
| Government revenue                             | % of GDP             | 44.4             | 44.2             | 44.5             | 44.1             |
| Government debt                                | (million euro)       | 6 901            | 7 356            | 7 740            | 8 246            |
|                                                | % of GDP             | 27.9             | 27.6             | 27.4             | 27.1             |
| <b>Slovakia</b>                                |                      |                  |                  |                  |                  |
| GDP mp                                         | (million SKK)        | 1 222 483        | 1 361 683        | 1 485 301        | 1 659 573        |
| Government deficit (-) / surplus (+)           | (million SKK)        | -33 413          | -32 129          | -41 628          | -61 214          |
|                                                | % of GDP             | -2.7             | -2.4             | -2.8             | -3.7             |
| Government expenditure                         | % of GDP             | 40.2             | 37.8             | 38.1             | 37.2             |
| Government revenue                             | % of GDP             | 37.4             | 35.4             | 35.3             | 33.5             |
| Government debt                                | (million SKK)        | 518 291          | 564 106          | 507 485          | 505 178          |
|                                                | % of GDP             | 42.4             | 41.4             | 34.2             | 30.4             |
| <b>Finland</b>                                 |                      |                  |                  |                  |                  |
| GDP mp                                         | (million euro)       | 145 938          | 152 345          | 157 162          | 167 062          |
| Government deficit (-) / surplus (+)           | (million euro)       | 3 650            | 3 473            | 4 293            | 6 401            |
|                                                | % of GDP             | 2.5              | 2.3              | 2.7              | 3.8              |
| Government expenditure                         | % of GDP             | 50.0             | 50.2             | 50.5             | 48.8             |
| Government revenue                             | % of GDP             | 52.4             | 52.3             | 53.0             | 52.5             |
| Government debt                                | (million euro)       | 64 719           | 67 242           | 65 053           | 65 536           |
|                                                | % of GDP             | 44.3             | 44.1             | 41.4             | 39.2             |
| <b>Sweden</b>                                  |                      |                  |                  |                  |                  |
| GDP mp                                         | (million SEK)        | 2 459 413        | 2 565 056        | 2 670 547        | 2 831 746        |
| Government deficit (-) / surplus (+)           | (million SEK)        | -21 708          | 20 917           | 62 811           | 69 597           |
|                                                | % of GDP             | -0.9             | 0.8              | 2.4              | 2.5              |
| Government expenditure                         | % of GDP             | 58.3             | 56.9             | 56.6             | 55.6             |
| Government revenue                             | % of GDP             | 57.2             | 57.5             | 58.7             | 57.9             |
| Government debt                                | (million SEK)        | 1 314 660        | 1 344 621        | 1 392 833        | 1 331 062        |
|                                                | % of GDP             | 53.5             | 52.4             | 52.2             | 47.0             |
| <b>United Kingdom**</b>                        |                      |                  |                  |                  |                  |
| GDP mp                                         | (million GBP)        | 1 139 569        | 1 206 659        | 1 257 112        | 1 326 944        |
| Government deficit (-) / surplus (+)           | (million GBP)        | -37 949          | -40 699          | -41 877          | -35 572          |
|                                                | % of GDP             | -3.3             | -3.4             | -3.3             | -2.7             |
| Government expenditure                         | % of GDP             | 42.0             | 42.5             | 43.6             | 43.8             |
| Government revenue                             | % of GDP             | 38.8             | 39.2             | 40.4             | 41.1             |
| Government debt                                | (million GBP)        | 440 970          | 487 714          | 529 216          | 573 478          |
|                                                | % of GDP             | 38.7             | 40.4             | 42.1             | 43.2             |
| <i>Financial year (fy)</i>                     |                      |                  |                  |                  |                  |
| <i>GDP mp fy</i>                               | <i>(million GBP)</i> | <i>1 157 557</i> | <i>1 218 260</i> | <i>1 272 810</i> | <i>1 347 565</i> |
| <i>Government deficit (-) / surplus (+) fy</i> | <i>(million GBP)</i> | <i>-37 274</i>   | <i>-42 123</i>   | <i>-39 086</i>   | <i>-35 081</i>   |
|                                                | <i>% of GDP</i>      | <i>-3.2</i>      | <i>-3.5</i>      | <i>-3.1</i>      | <i>-2.6</i>      |
| <i>Government debt fy</i>                      | <i>(million GBP)</i> | <i>446 244</i>   | <i>483 621</i>   | <i>531 370</i>   | <i>574 388</i>   |
|                                                | <i>% of GDP</i>      | <i>38.6</i>      | <i>39.7</i>      | <i>41.7</i>      | <i>42.6</i>      |

\*\* Data refer to calendar years. Data referring to the financial year (1 April to 31 March), are shown in italics. For the United Kingdom, the relevant data for implementation of the excessive deficit procedure are financial year data.

## Annex I

### Main revisions between the April 2007 and October 2007 notifications

Below are shown country specific explanations for the largest revisions in deficit and debt between the April 2007 and October 2007 notifications, as well as in GDP and deficit and debt ratios (see table below).

#### Deficit

**Bulgaria:** The decrease in the deficit (or increase in the surplus) for 2003 to 2005 results mainly from a change in method for the valuation of restitution vouchers (from nominal to market value, as required under ESA 1995).

**Denmark:** The increase in the surplus for 2006 is mainly due to upward revisions of corporate tax revenue.

**Estonia:** The decrease in the surplus for 2003 to 2006 is due to updated source data on gross fixed capital formation and to methodological improvements in the recording of EU grants and taxes receivables.

**Ireland:** The increase in the surplus in 2005 is due to updated source data for extra budgetary units and EU related accruals.

**Spain:** The increase in the deficit (or decrease in the surplus) for 2003 to 2006 is due to the reclassification of capital injections into ADIF (high speed railways infrastructure) as capital transfers, in line with Eurostat advice.

**Cyprus:** The increase in the deficit in 2003 is due to the reclassification of a superdividend in excess of an operating profit as a financial transaction. The decrease in the deficit for 2006 is mainly due to upward revisions of receivables relating to taxes (VAT).

**Latvia:** The change in the government balance for year 2005 and 2006 is mainly due to the recognition of the Riga South Bridge construction as government expenditure for these years in line with Eurostat advice and to revisions in receivables/payables relating to expenditure in 2006.

**Lithuania:** The increase in the deficit in 2006 is mainly due to the exclusion from interest expenditure of premium (/discount) on bonds issued by government.

**Luxembourg:** The increase in the surplus for 2005 and 2006 is due to updated data sources on revenue and expenditure.

**Austria:** The increase in the deficit for 2006 is mainly due to increased state government outlays to cover operating losses and investments in public hospitals and to the impact of a debt cancellation in the context of the privatisation of Bank Burgenland.

**Slovakia:** The increase in the deficit for 2006 is mainly due to a downward revision in interest revenue of government.

**Sweden:** The increase in the surplus for 2005 relates to the correction of the recording of a dividend and in 2006 mainly to updated data on taxes for holding gains, real estate and corporation profits.

**United Kingdom:** The increase in the deficit for 2003-2005 is mainly due to a more appropriate treatment of proceeds relating to the disposal of social housing (local government quasi-corporations), which have now been recorded as financial transactions instead of government revenue.

#### Debt

**France:** The increase in the debt for 2003-2006 relates to the reclassification of the debt of the SAAD (i.e. SNCF debt allocated in a part of the special debt account) as government debt in line with Eurostat advice.

**Latvia:** The increase in the debt for 2005 and 2006 is due to the recognition of a government liability arising from the construction of the Riga South Bridge, in line with Eurostat advice, as well as to new source data relating to deposit liabilities.

**Slovenia:** The decrease in the debt for 2003-2006 (notable in 2004) is mainly due to improved data sources, notably with respect to consolidation.

#### GDP

The GDP notified in October 2007 for EDP purposes was revised by some Member States by noticeable amounts compared to that notified in April 2007 for the reporting period 2003-2006, in particular by **Malta, Slovenia, Estonia** and **Luxembourg**, which may have a substantial impact on debt/GDP ratios. For **Greece**, please see "other issues".

Changes in GDP affect deficit and debt ratios due to the denominator effect. See table below.



**Revisions in government deficit/surplus and government debt ratios**  
from the April 2007 notification to the October 2007 notification

|                |                                                    | Deficit/surplus* |             |             |             | Debt        |             |             |             |
|----------------|----------------------------------------------------|------------------|-------------|-------------|-------------|-------------|-------------|-------------|-------------|
|                |                                                    | 2003             | 2004        | 2005        | 2006        | 2003        | 2004        | 2005        | 2006        |
| Belgium        | <b>Revision in deficit/surplus and debt ratios</b> | <b>-0.1</b>      | <b>0.0</b>  | <b>0.0</b>  | <b>0.2</b>  | <b>0.0</b>  | <b>-0.1</b> | <b>-1.0</b> | <b>-0.9</b> |
|                | - due to revision of deficit/surplus or debt       | 0.0              | 0.0         | 0.0         | 0.2         | 0.0         | 0.0         | 0.0         | 0.1         |
|                | - due to revision of GDP                           | -0.1             | 0.0         | 0.0         | 0.0         | 0.0         | -0.1        | -1.0        | -1.0        |
| Bulgaria       | <b>Revision in deficit/surplus and debt ratios</b> | <b>0.9</b>       | <b>0.1</b>  | <b>0.1</b>  | <b>-0.1</b> | <b>0.0</b>  | <b>0.0</b>  | <b>0.0</b>  | <b>0.0</b>  |
|                | - due to revision of deficit/surplus or debt       | 0.9              | 0.1         | 0.1         | -0.1        | 0.0         | 0.0         | 0.0         | 0.0         |
|                | - due to revision of GDP                           | 0.0              | 0.0         | 0.0         | 0.0         | 0.0         | 0.0         | 0.0         | 0.0         |
| Czech Republic | <b>Revision in deficit/surplus and debt ratios</b> | <b>0.0</b>       | <b>-0.1</b> | <b>0.0</b>  | <b>0.0</b>  | <b>0.0</b>  | <b>-0.3</b> | <b>-0.2</b> | <b>-0.3</b> |
|                | - due to revision of deficit/surplus or debt       | 0.0              | -0.1        | 0.0         | 0.0         | 0.0         | 0.0         | 0.0         | 0.0         |
|                | - due to revision of GDP                           | 0.0              | 0.0         | 0.0         | 0.0         | 0.0         | -0.3        | -0.2        | -0.3        |
| Denmark        | <b>Revision in deficit/surplus and debt ratios</b> | <b>-0.1</b>      | <b>-0.1</b> | <b>-0.1</b> | <b>0.4</b>  | <b>0.0</b>  | <b>0.0</b>  | <b>0.0</b>  | <b>0.1</b>  |
|                | - due to revision of deficit/surplus or debt       | 0.0              | -0.1        | 0.0         | 0.4         | 0.0         | 0.0         | 0.0         | 0.2         |
|                | - due to revision of GDP                           | -0.1             | 0.0         | -0.1        | 0.0         | 0.0         | 0.0         | 0.0         | -0.1        |
| Germany        | <b>Revision in deficit/surplus and debt ratios</b> | <b>0.0</b>       | <b>-0.1</b> | <b>-0.2</b> | <b>0.1</b>  | <b>-0.1</b> | <b>-0.1</b> | <b>-0.1</b> | <b>-0.4</b> |
|                | - due to revision of deficit/surplus or debt       | 0.0              | 0.0         | -0.1        | 0.1         | 0.0         | 0.0         | 0.0         | 0.1         |
|                | - due to revision of GDP                           | 0.0              | -0.1        | -0.1        | 0.0         | -0.1        | -0.1        | -0.1        | -0.5        |
| Estonia        | <b>Revision in deficit/surplus and debt ratios</b> | <b>-0.2</b>      | <b>-0.5</b> | <b>-0.4</b> | <b>-0.2</b> | <b>-0.2</b> | <b>-0.1</b> | <b>0.0</b>  | <b>-0.1</b> |
|                | - due to revision of deficit/surplus or debt       | -0.2             | -0.5        | -0.4        | -0.2        | 0.0         | 0.0         | 0.0         | 0.0         |
|                | - due to revision of GDP                           | 0.0              | 0.0         | 0.0         | 0.0         | -0.2        | -0.1        | 0.0         | -0.1        |
| Ireland        | <b>Revision in deficit/surplus and debt ratios</b> | <b>0.0</b>       | <b>-0.1</b> | <b>0.2</b>  | <b>0.0</b>  | <b>-0.1</b> | <b>-0.2</b> | <b>0.0</b>  | <b>0.2</b>  |
|                | - due to revision of deficit/surplus or debt       | 0.0              | 0.0         | 0.2         | 0.0         | 0.0         | 0.0         | 0.0         | 0.0         |
|                | - due to revision of GDP                           | 0.0              | -0.1        | 0.0         | 0.0         | -0.1        | -0.2        | 0.0         | 0.2         |
| Greece         | <b>Revision in deficit/surplus and debt ratios</b> | <b>0.6</b>       | <b>0.6</b>  | <b>0.4</b>  | <b>0.1</b>  | <b>-9.9</b> | <b>-9.9</b> | <b>-9.5</b> | <b>-9.3</b> |
|                | - due to revision of deficit/surplus or debt       | 0.0              | -0.1        | -0.1        | -0.1        | 0.0         | 0.0         | 0.0         | -0.1        |
|                | - due to revision of GDP                           | 0.6              | 0.7         | 0.5         | 0.2         | -9.9        | -9.9        | -9.5        | -9.2        |
| Spain          | <b>Revision in deficit/surplus and debt ratios</b> | <b>-0.2</b>      | <b>-0.1</b> | <b>-0.1</b> | <b>0.0</b>  | <b>-0.1</b> | <b>0.0</b>  | <b>-0.2</b> | <b>-0.2</b> |
|                | - due to revision of deficit/surplus or debt       | -0.2             | -0.2        | -0.1        | 0.0         | 0.0         | 0.0         | 0.0         | 0.0         |
|                | - due to revision of GDP                           | 0.0              | 0.1         | 0.0         | 0.0         | -0.1        | 0.0         | -0.2        | -0.2        |
| France         | <b>Revision in deficit/surplus and debt ratios</b> | <b>0.0</b>       | <b>0.0</b>  | <b>0.1</b>  | <b>0.0</b>  | <b>0.5</b>  | <b>0.6</b>  | <b>0.5</b>  | <b>0.3</b>  |
|                | - due to revision of deficit/surplus or debt       | 0.0              | 0.0         | 0.0         | 0.0         | 0.6         | 0.5         | 0.5         | 0.5         |
|                | - due to revision of GDP                           | 0.0              | 0.0         | 0.1         | 0.0         | -0.1        | 0.1         | 0.0         | -0.2        |
| Italy          | <b>Revision in deficit/surplus and debt ratios</b> | <b>0.0</b>       | <b>0.0</b>  | <b>0.0</b>  | <b>0.0</b>  | <b>0.0</b>  | <b>0.0</b>  | <b>0.0</b>  | <b>0.0</b>  |
|                | - due to revision of deficit/surplus or debt       | 0.0              | 0.0         | 0.0         | 0.0         | 0.0         | 0.0         | 0.0         | 0.0         |
|                | - due to revision of GDP                           | 0.0              | 0.0         | 0.0         | 0.0         | 0.0         | 0.0         | 0.0         | 0.0         |
| Cyprus         | <b>Revision in deficit/surplus and debt ratios</b> | <b>-0.2</b>      | <b>0.0</b>  | <b>-0.1</b> | <b>0.3</b>  | <b>-0.2</b> | <b>-0.1</b> | <b>-0.1</b> | <b>-0.1</b> |
|                | - due to revision of deficit/surplus or debt       | -0.2             | 0.0         | -0.1        | 0.3         | 0.0         | 0.0         | 0.0         | 0.1         |
|                | - due to revision of GDP                           | 0.0              | 0.0         | 0.0         | 0.0         | -0.2        | -0.1        | -0.1        | -0.2        |
| Latvia         | <b>Revision in deficit/surplus and debt ratios</b> | <b>0.0</b>       | <b>0.0</b>  | <b>-0.2</b> | <b>-0.7</b> | <b>0.0</b>  | <b>0.0</b>  | <b>0.5</b>  | <b>0.6</b>  |
|                | - due to revision of deficit/surplus or debt       | 0.0              | 0.0         | -0.1        | -0.7        | 0.0         | 0.0         | 0.5         | 0.6         |
|                | - due to revision of GDP                           | 0.0              | 0.0         | -0.1        | 0.0         | 0.0         | 0.0         | 0.0         | 0.0         |
| Lithuania      | <b>Revision in deficit/surplus and debt ratios</b> | <b>0.0</b>       | <b>0.0</b>  | <b>0.0</b>  | <b>-0.3</b> | <b>0.0</b>  | <b>0.0</b>  | <b>0.0</b>  | <b>0.0</b>  |
|                | - due to revision of deficit/surplus or debt       | 0.0              | 0.0         | 0.0         | -0.3        | 0.0         | 0.0         | 0.0         | 0.0         |
|                | - due to revision of GDP                           | 0.0              | 0.0         | 0.0         | 0.0         | 0.0         | 0.0         | 0.0         | 0.0         |
| Luxembourg     | <b>Revision in deficit/surplus and debt ratios</b> | <b>0.1</b>       | <b>0.0</b>  | <b>0.2</b>  | <b>0.6</b>  | <b>0.0</b>  | <b>-0.2</b> | <b>0.1</b>  | <b>-0.2</b> |
|                | - due to revision of deficit/surplus or debt       | 0.1              | 0.0         | 0.2         | 0.6         | 0.0         | 0.0         | 0.2         | 0.0         |
|                | - due to revision of GDP                           | 0.0              | 0.0         | 0.0         | 0.0         | 0.0         | -0.2        | -0.1        | -0.2        |
| Hungary        | <b>Revision in deficit/surplus and debt ratios</b> | <b>0.0</b>       | <b>0.0</b>  | <b>0.0</b>  | <b>0.0</b>  | <b>0.0</b>  | <b>0.0</b>  | <b>-0.1</b> | <b>-0.4</b> |
|                | - due to revision of deficit/surplus or debt       | 0.0              | 0.0         | 0.0         | -0.1        | 0.0         | 0.0         | 0.0         | 0.1         |
|                | - due to revision of GDP                           | 0.0              | 0.0         | 0.0         | 0.1         | 0.0         | 0.0         | -0.1        | -0.5        |

\* Revisions to deficit/surplus ratios: a positive sign means an improved government balance relative to GDP, and a negative sign a worsening.

**Revisions in government deficit/surplus and government debt ratios**  
from the April 2007 notification to the October 2007 notification

|                       |                                                    | Deficit/surplus* |             |             |             | Debt        |             |             |             |
|-----------------------|----------------------------------------------------|------------------|-------------|-------------|-------------|-------------|-------------|-------------|-------------|
|                       |                                                    | 2003             | 2004        | 2005        | 2006        | 2003        | 2004        | 2005        | 2006        |
| <b>Malta</b>          | <b>Revision in deficit/surplus and debt ratios</b> | <b>0.1</b>       | <b>0.1</b>  | <b>0.0</b>  | <b>0.1</b>  | <b>-1.1</b> | <b>-1.2</b> | <b>-1.6</b> | <b>-1.8</b> |
|                       | - due to revision of deficit/surplus or debt       | 0.0              | 0.0         | 0.0         | -0.1        | 0.0         | 0.0         | 0.0         | 0.1         |
|                       | - due to revision of GDP                           | 0.1              | 0.1         | 0.0         | 0.2         | -1.1        | -1.2        | -1.6        | -1.9        |
| <b>Netherlands</b>    | <b>Revision in deficit/surplus and debt ratios</b> | <b>0.0</b>       | <b>0.1</b>  | <b>0.0</b>  | <b>0.0</b>  | <b>0.0</b>  | <b>-0.2</b> | <b>-0.4</b> | <b>-0.8</b> |
|                       | - due to revision of deficit/surplus or debt       | 0.0              | 0.1         | 0.0         | 0.0         | 0.0         | 0.0         | 0.0         | -0.2        |
|                       | - due to revision of GDP                           | 0.0              | 0.0         | 0.0         | 0.0         | 0.0         | -0.2        | -0.4        | -0.6        |
| <b>Austria</b>        | <b>Revision in deficit/surplus and debt ratios</b> | <b>0.0</b>       | <b>0.0</b>  | <b>0.0</b>  | <b>-0.3</b> | <b>0.0</b>  | <b>-0.1</b> | <b>-0.1</b> | <b>-0.5</b> |
|                       | - due to revision of deficit/surplus or debt       | 0.0              | 0.0         | 0.0         | -0.3        | 0.0         | 0.0         | 0.0         | -0.2        |
|                       | - due to revision of GDP                           | 0.0              | 0.0         | 0.0         | 0.0         | 0.0         | -0.1        | -0.1        | -0.3        |
| <b>Poland</b>         | <b>Revision in deficit/surplus and debt ratios</b> | <b>0.0</b>       | <b>0.0</b>  | <b>0.0</b>  | <b>0.1</b>  | <b>0.0</b>  | <b>0.0</b>  | <b>0.0</b>  | <b>-0.2</b> |
|                       | - due to revision of deficit/surplus or debt       | 0.0              | 0.0         | 0.0         | 0.1         | 0.0         | 0.0         | 0.0         | 0.0         |
|                       | - due to revision of GDP                           | 0.0              | 0.0         | 0.0         | 0.0         | 0.0         | 0.0         | 0.0         | -0.2        |
| <b>Portugal</b>       | <b>Revision in deficit/surplus and debt ratios</b> | <b>0.0</b>       | <b>-0.1</b> | <b>0.0</b>  | <b>0.0</b>  | <b>0.1</b>  | <b>0.1</b>  | <b>0.1</b>  | <b>0.1</b>  |
|                       | - due to revision of deficit/surplus or debt       | 0.0              | 0.0         | -0.1        | 0.0         | 0.0         | 0.1         | 0.1         | 0.0         |
|                       | - due to revision of GDP                           | 0.0              | -0.1        | 0.1         | 0.0         | 0.1         | 0.0         | 0.0         | 0.1         |
| <b>Romania</b>        | <b>Revision in deficit/surplus and debt ratios</b> | <b>0.0</b>       | <b>0.0</b>  | <b>0.0</b>  | <b>0.0</b>  | <b>0.0</b>  | <b>0.0</b>  | <b>0.0</b>  | <b>0.0</b>  |
|                       | - due to revision of deficit/surplus or debt       | 0.0              | 0.0         | 0.0         | 0.0         | 0.0         | 0.0         | 0.0         | 0.0         |
|                       | - due to revision of GDP                           | 0.0              | 0.0         | 0.0         | 0.0         | 0.0         | 0.0         | 0.0         | 0.0         |
| <b>Slovenia</b>       | <b>Revision in deficit/surplus and debt ratios</b> | <b>0.1</b>       | <b>0.0</b>  | <b>0.0</b>  | <b>0.2</b>  | <b>-0.7</b> | <b>-1.3</b> | <b>-1.0</b> | <b>-0.7</b> |
|                       | - due to revision of deficit/surplus or debt       | 0.0              | 0.0         | 0.0         | 0.2         | -0.2        | -0.8        | -0.3        | -0.1        |
|                       | - due to revision of GDP                           | 0.1              | 0.0         | 0.0         | 0.0         | -0.5        | -0.5        | -0.7        | -0.6        |
| <b>Slovakia</b>       | <b>Revision in deficit/surplus and debt ratios</b> | <b>0.0</b>       | <b>0.0</b>  | <b>0.0</b>  | <b>-0.3</b> | <b>0.0</b>  | <b>-0.1</b> | <b>-0.3</b> | <b>-0.3</b> |
|                       | - due to revision of deficit/surplus or debt       | 0.0              | 0.0         | 0.0         | -0.3        | 0.0         | 0.0         | 0.0         | 0.1         |
|                       | - due to revision of GDP                           | 0.0              | 0.0         | 0.0         | 0.0         | 0.0         | -0.1        | -0.3        | -0.4        |
| <b>Finland</b>        | <b>Revision in deficit/surplus and debt ratios</b> | <b>0.0</b>       | <b>0.0</b>  | <b>0.0</b>  | <b>-0.1</b> | <b>0.0</b>  | <b>0.0</b>  | <b>0.0</b>  | <b>0.1</b>  |
|                       | - due to revision of deficit/surplus or debt       | 0.0              | 0.0         | 0.0         | -0.1        | 0.0         | 0.0         | 0.0         | -0.1        |
|                       | - due to revision of GDP                           | 0.0              | 0.0         | 0.0         | 0.0         | 0.0         | 0.0         | 0.0         | 0.2         |
| <b>Sweden</b>         | <b>Revision in deficit/surplus and debt ratios</b> | <b>0.0</b>       | <b>0.0</b>  | <b>0.3</b>  | <b>0.3</b>  | <b>0.0</b>  | <b>0.0</b>  | <b>0.0</b>  | <b>0.1</b>  |
|                       | - due to revision of deficit/surplus or debt       | 0.0              | 0.0         | 0.3         | 0.2         | 0.0         | 0.0         | 0.0         | 0.0         |
|                       | - due to revision of GDP                           | 0.0              | 0.0         | 0.0         | 0.1         | 0.0         | 0.0         | 0.0         | 0.1         |
| <b>United Kingdom</b> | <b>Revision in deficit/surplus and debt ratios</b> | <b>-0.1</b>      | <b>-0.3</b> | <b>-0.2</b> | <b>0.1</b>  | <b>-0.1</b> | <b>0.1</b>  | <b>-0.1</b> | <b>-0.3</b> |
|                       | - due to revision of deficit/surplus or debt       | -0.2             | -0.2        | -0.3        | 0.1         | 0.2         | 0.4         | 0.2         | 0.1         |
|                       | - due to revision of GDP                           | 0.1              | -0.1        | 0.1         | 0.0         | -0.3        | -0.3        | -0.3        | -0.4        |

\* Revisions to deficit/surplus ratios: a positive sign means an improved government balance relative to GDP, and a negative sign a worsening.

## **Annex II**

### **Classification of funded pension schemes in case of government responsibility or guarantee**

On 2 March 2004 Eurostat published a decision on classification of funded pension schemes in case of government responsibility or guarantee (News Release 30/2004). As announced on that occasion, Eurostat organised bilateral discussions with several Member States on the implementation of the decision. In the context of these discussions, it appeared that some Member States needed a transitional period to implement the decision and to avoid disruptions in the conduct of their budgetary policies. This transitional period having finished at the end of 2006, as from the April 2007 notification all countries have classified their defined contribution funded pension schemes outside the government sector. The notified figures in April and October 2007 are therefore, for all years, fully in line with the Eurostat decision of 2 March 2004.
