# Supplementary material
Source: publisher figshare collection journal article supplement (https://tandf.figshare.com/articles/dataset/_/4793563)
Supplement: Supplementary file 13 [file 1]

## Provision of deficit and debt data for 2008 - first notification

# Euro area and EU27 government deficit at 1.9% and 2.3% of GDP respectively

## Government debt at 69.3% and 61.5%

In 2008, the government deficit<sup>1</sup> and government debt<sup>1</sup> of both the **euro area**<sup>2</sup> (EA16) and the **EU27** increased compared with 2007. In the **euro area** the government deficit to GDP ratio increased from 0.6% in 2007<sup>3</sup> to 1.9% in 2008, and in the **EU27** it increased from 0.8% to 2.3%. In the **euro area** the government debt to GDP ratio increased from 66.0% at the end of 2007 to 69.3% at the end of 2008, and in the **EU27** from 58.7% to 61.5%.

|                                      |                | 2005       | 2006       | 2007       | 2008       |
|--------------------------------------|----------------|------------|------------|------------|------------|
| <b>Euro area (EA16)</b>              |                |            |            |            |            |
| GDP market prices (mp)               | (million euro) | 8 149 415  | 8 553 291  | 8 994 358  | 9 274 550  |
| Government deficit (-) / surplus (+) | (million euro) | -204 391   | -107 825   | -57 346    | -176 191   |
|                                      | % of GDP       | -2.5       | -1.3       | -0.6       | -1.9       |
| Government expenditure               | % of GDP       | 47.3       | 46.6       | 46.1       | 46.6       |
| Government revenue                   | % of GDP       | 44.8       | 45.3       | 45.4       | 44.7       |
| Government debt                      | (million euro) | 5 707 011  | 5 837 917  | 5 936 166  | 6 430 964  |
|                                      | % of GDP       | 70.0       | 68.3       | 66.0       | 69.3       |
| <b>EU27</b>                          |                |            |            |            |            |
| GDP mp                               | (million euro) | 11 063 093 | 11 675 731 | 12 355 101 | 12 506 693 |
| Government deficit (-) / surplus (+) | (million euro) | -270 657   | -163 600   | -104 241   | -287 987   |
|                                      | % of GDP       | -2.4       | -1.4       | -0.8       | -2.3       |
| Government expenditure               | % of GDP       | 46.9       | 46.3       | 45.7       | 46.8       |
| Government revenue                   | % of GDP       | 44.4       | 44.9       | 44.9       | 44.5       |
| Government debt                      | (million euro) | 6 933 904  | 7 160 565  | 7 249 674  | 7 696 717  |
|                                      | % of GDP       | 62.7       | 61.3       | 58.7       | 61.5       |

In 2008 the largest government deficits in percentage of GDP were recorded by **Ireland** (-7.1%), the **United Kingdom** (-5.5%), **Romania** (-5.4%), **Greece** (-5.0%), **Malta** (-4.7%), **Latvia** (-4.0%), **Poland** (-3.9%), **Spain** (-3.8%), **France** (-3.4%), **Hungary** (-3.4%), **Lithuania** (-3.2%) and **Estonia** (-3.0%). Seven Member States registered a government surplus in 2008: **Finland** (+4.2%), **Denmark** (+3.6%), **Luxembourg** (+2.6%), **Sweden** (+2.5%), **Bulgaria** (+1.5%), the **Netherlands** (+1.0%) and **Cyprus** (+0.9%). In all, five Member States recorded an improved government balance relative to GDP in 2008 compared with 2007, 21 a worsening and one remained unchanged.

At the end of 2008, the lowest ratios of government debt to GDP were recorded in **Estonia** (4.8%), **Romania** (13.6%), **Bulgaria** (14.1%), **Luxembourg** (14.7%) and **Lithuania** (15.6%). Nine Member States had government debt ratios higher than 60% of GDP in 2008: **Italy** (105.8%), **Greece** (97.6%), **Belgium** (89.6%), **Hungary** (73.0%), **France** (68.0%), **Portugal** (66.4%), **Germany** (65.9%), **Malta** (64.1%) and **Austria** (62.5%).

In 2008, government expenditure<sup>4</sup> in the **euro area** was equivalent to 46.6% of GDP and government revenue<sup>4</sup> to 44.7%. The figures for the **EU27** were 46.8% and 44.5% respectively. In both zones, the government expenditure ratio increased between 2007 and 2008, while the government revenue ratio decreased.

## Reservations on reported data<sup>5</sup>

**Denmark:** During 2008 the Danish authorities nationalised the Roskilde Bank and established a vehicle for bank rescues (AFS-Afviklingsselskabet). These bodies have been classified as financial corporations in the reported Danish data. Eurostat is investigating these cases.

**United Kingdom:** Eurostat has withdrawn the reservation on the data reported by the United Kingdom in the October 2008 notification (News release 147/2008 of 22 October) following a clarification that the Bank of England lending to Northern Rock was undertaken under the direction of the UK tripartite authorities (HM Treasury, the Bank of England, the Financial Services Authority).

From April 2008 the United Kingdom government provided 185 billion GBP of treasury bills to the Bank of England for use in the Special Liquidity Scheme. These bills are not currently recorded as part of United Kingdom government debt. Eurostat is considering the appropriate treatment of these bills, and whether or not they should be statistically included as part of United Kingdom government debt.

## Amendment by Eurostat to reported data<sup>6</sup>

**United Kingdom:** Eurostat has amended the deficit data notified by the United Kingdom for the years 2005 to 2008 for consistency of recording of UMTS licences proceeds in 2000. This leads to an increase in the government deficit in 2005, 2007 and 2008 (as well as for financial year 2004/2005, 2005/2006 and 2007/2008) by 1044 mn GBP (0.1% of GDP) and in 2006 (financial year 2006/2007) by 1045 mn GBP (0.1% of GDP). There is no change in the reported debt figures.

## Other issues

Eurostat is in the process of drawing up guidance on the statistical treatment of public operations to support financial markets. Given the complexity and variety of such operations across countries, there is a need for a consistent package of guidance following ESA95 rules.

## Background

In this News Release **Eurostat, the Statistical Office of the European Communities**, is providing<sup>7</sup> government deficit and debt data based on figures reported in the **first 2009 notification** by EU Member States for the years 2005-2008, for the application of the excessive deficit procedure (EDP). This notification is based on the ESA95 system of national accounts. This News Release also includes data on government expenditure and revenue and an annex with the main revisions since the October 2008 News Release.

Eurostat will also be releasing information on the underlying government sector accounts, as well as on the contribution of deficit/surplus and other relevant factors to the variation in the debt level (stock-flow adjustment), on the government finance statistics section on its website:

**[http://epp.eurostat.ec.europa.eu/pls/portal/url/page/PGP\\_DS\\_GFS/PGE\\_DS\\_GFS\\_0](http://epp.eurostat.ec.europa.eu/pls/portal/url/page/PGP_DS_GFS/PGE_DS_GFS_0)**

1. According to the Protocol on the excessive deficit procedure annexed to the EC Treaty, government deficit (surplus) means the net borrowing (net lending) of the whole general government sector (central government, state government, local government and social security funds). It is calculated according to national accounts concepts (European System of Accounts, ESA95). Government debt is the consolidated gross debt of the whole general government sector outstanding at the end of the year (at nominal value).
  - Table of euro area and EU27 aggregates: the data are in euro. For those countries not belonging to the euro area, the rate of conversion into euro is as follows:
    - for deficit / surplus and GDP data, the annual average exchange rate;
    - for the stock of government debt, the end of year exchange rate.
  - Table of national data: these are in national currencies. For Cyprus, Malta, Slovenia and Slovakia, data for the years prior to the adoption of the euro have been converted into euro according to the irrevocable conversion rate.
2. Euro area (EA16): Belgium, Germany, Greece, Spain, France, Ireland, Italy, Cyprus, Luxembourg, Malta, Netherlands, Austria, Portugal, Slovenia, Slovakia and Finland. In the attached table, the euro area is defined as including Cyprus, Malta, Slovenia and Slovakia for the full period, although Slovenia joined the euro area on 1 January 2007, Cyprus and Malta on 1 January 2008 and Slovakia on 1 January 2009.
3. In the previous provision of data for the excessive deficit procedure, the 2007 government deficits for the EA15 and the EU27 were 0.6% and 0.9% of GDP respectively. The government debt of the EA15 was 66.3% of GDP and of the EU27 58.7% of GDP. See News Release 147/2008 of 22 October 2008.
4. Government expenditure and revenue are reported to Eurostat under the ESA95 transmission programme. They are the sum of non-financial transactions by general government, and include both current and capital transactions. For definitions, see Council Regulation No. 2223/96, as amended. It should be noted that the government balance (i.e. the difference between total government revenue and expenditure) is not exactly the same under ESA95 as that for the purpose of the

excessive deficit procedure. Regulation (EC) No 2558/2001 on the reclassification of settlements under swaps agreements and forward rate agreements implies that there are two relevant definitions of government deficit/surplus:

- The ESA95 definition of net lending /net borrowing does not include streams of payments and receipts resulting from swap agreements and forward rate agreements, as these are recorded as financial transactions;
- For the purpose of the excessive deficit procedure, streams of payments and receipts resulting from swaps and forward rate agreements are recorded as interest expenditure and contribute to the net lending/net borrowing of general government.

Concerning 2008, for most Member States, the difference, if any, between the two balances is minor.

5. The term "reservations" is defined in article 8h (1) of Council Regulation 3605/93, as amended. The Commission (Eurostat) expresses reservations when it has doubts on the quality of the reported data.
6. According to Article 8h (2) of Council Regulation 3605/93 as amended, the Commission (Eurostat) may amend actual data reported by Member States and provide the amended data and a justification of the amendment where there is evidence that actual data reported by Member States do not comply with the quality requirements (compliance with accounting rules, completeness, reliability, timeliness and consistency of statistical data).
7. According to Article 8g (1) of Council Regulation 3605/93, Eurostat provides the actual government deficit and debt data for the application of the Protocol on the excessive deficit procedure, within three weeks after the reporting deadlines. This provision of data shall be effected through publication.

*For further information on the methodology of statistics reported under the excessive deficit procedure, please see Council Regulation 3605/93, as amended (consolidated version available at <http://eur-lex.europa.eu/LexUriServ/site/en/consleg/1993/R/01993R3605-20051223-en.pdf>), Council Regulation 2223/96, as amended (consolidated version available at <http://eur-lex.europa.eu/LexUriServ/site/en/consleg/1996/R/01996R2223-20030807-en.pdf>) and the Eurostat publication "ESA95 manual on government deficit and debt", second edition (2002), 240 pages, ISBN 92-894-3231-4, pdf file free of charge, paper copy 37 euro (excluding VAT). Additions to this manual on securitisation, capital injections, classification of funded pension schemes, lump sum payments to government in the context of the transfer of pension obligations, and long term contracts between government units and non-government partners are available in the government finance statistics section on the Eurostat website.*

Issued by:  
**Eurostat Press Office**

**Tim ALLEN**  
**Tel: +352-4301-33 444**  
**[eurostat-pressoffice@ec.europa.eu](mailto:eurostat-pressoffice@ec.europa.eu)**

Eurostat news releases on the Internet:  
**<http://ec.europa.eu/eurostat>**

Selected Principal European Economic Indicators:  
**<http://ec.europa.eu/eurostat/euroindicators>**

**GDP, government deficit/surplus and debt in the EU (in national currencies)**

|                                      |                | 2005      | 2006      | 2007      | 2008      |
|--------------------------------------|----------------|-----------|-----------|-----------|-----------|
| <b>Belgium</b>                       |                |           |           |           |           |
| GDP mp                               | (million euro) | 302 112   | 318 223   | 334 917   | 344 705   |
| Government deficit (-) / surplus (+) | (million euro) | -8 152    | 995       | -784      | -4 123    |
|                                      | % of GDP       | -2.7      | 0.3       | -0.2      | -1.2      |
| Government expenditure               | % of GDP       | 52.2      | 48.5      | 48.3      | 49.9      |
| Government revenue                   | % of GDP       | 49.4      | 48.7      | 48.1      | 48.6      |
| Government debt                      | (million euro) | 278 587   | 279 669   | 281 183   | 308 744   |
|                                      | % of GDP       | 92.2      | 87.9      | 84.0      | 89.6      |
| <b>Bulgaria</b>                      |                |           |           |           |           |
| GDP mp                               | (million BGN)  | 42 797    | 49 361    | 56 520    | 66 728    |
| Government deficit (-) / surplus (+) | (million BGN)  | 809       | 1 485     | 39        | 1 015     |
|                                      | % of GDP       | 1.9       | 3.0       | 0.1       | 1.5       |
| Government expenditure               | % of GDP       | 39.3      | 36.5      | 41.5      | 37.4      |
| Government revenue                   | % of GDP       | 41.2      | 39.5      | 41.5      | 39.0      |
| Government debt                      | (million BGN)  | 12 498    | 11 189    | 10 287    | 9 386     |
|                                      | % of GDP       | 29.2      | 22.7      | 18.2      | 14.1      |
| <b>Czech Republic</b>                |                |           |           |           |           |
| GDP mp                               | (million CZK)  | 2 983 862 | 3 215 642 | 3 530 249 | 3 705 868 |
| Government deficit (-) / surplus (+) | (million CZK)  | -106 749  | -84 902   | -21 541   | -53 990   |
|                                      | % of GDP       | -3.6      | -2.6      | -0.6      | -1.5      |
| Government expenditure               | % of GDP       | 45.0      | 43.8      | 42.6      | 42.4      |
| Government revenue                   | % of GDP       | 41.4      | 41.2      | 42.0      | 40.9      |
| Government debt                      | (million CZK)  | 888 579   | 951 474   | 1 020 693 | 1 105 753 |
|                                      | % of GDP       | 29.8      | 29.6      | 28.9      | 29.8      |
| <b>Denmark</b>                       |                |           |           |           |           |
| GDP mp                               | (million DKK)  | 1 545 300 | 1 628 600 | 1 687 900 | 1 739 700 |
| Government deficit (-) / surplus (+) | (million DKK)  | 80 300    | 84 500    | 76 500    | 62 100    |
|                                      | % of GDP       | 5.2       | 5.2       | 4.5       | 3.6       |
| Government expenditure               | % of GDP       | 52.8      | 51.6      | 51.0      | 51.7      |
| Government revenue                   | % of GDP       | 57.8      | 56.6      | 55.4      | 55.4      |
| Government debt                      | (million DKK)  | 572 800   | 509 500   | 453 100   | 580 000   |
|                                      | % of GDP       | 37.1      | 31.3      | 26.8      | 33.3      |
| <b>Germany</b>                       |                |           |           |           |           |
| GDP mp                               | (million euro) | 2 243 200 | 2 321 500 | 2 422 900 | 2 492 000 |
| Government deficit (-) / surplus (+) | (million euro) | -74 050   | -35 620   | -3 950    | -3 290    |
|                                      | % of GDP       | -3.3      | -1.5      | -0.2      | -0.1      |
| Government expenditure               | % of GDP       | 46.8      | 45.3      | 44.2      | 43.9      |
| Government revenue                   | % of GDP       | 43.5      | 43.8      | 44.0      | 43.8      |
| Government debt                      | (million euro) | 1 521 869 | 1 568 995 | 1 576 607 | 1 641 844 |
|                                      | % of GDP       | 67.8      | 67.6      | 65.1      | 65.9      |
| <b>Estonia</b>                       |                |           |           |           |           |
| GDP mp                               | (million EEK)  | 173 530   | 205 038   | 238 929   | 248 149   |
| Government deficit (-) / surplus (+) | (million EEK)  | 2 587     | 5 977     | 6 448     | -7 352    |
|                                      | % of GDP       | 1.5       | 2.9       | 2.7       | -3.0      |
| Government expenditure               | % of GDP       | 34.0      | 34.2      | 35.5      | 40.9      |
| Government revenue                   | % of GDP       | 35.5      | 37.1      | 38.2      | 37.9      |
| Government debt                      | (million EEK)  | 7 845     | 8 727     | 8 333     | 11 874    |
|                                      | % of GDP       | 4.5       | 4.3       | 3.5       | 4.8       |
| <b>Ireland</b>                       |                |           |           |           |           |
| GDP mp                               | (million euro) | 162 168   | 177 286   | 190 603   | 185 721   |
| Government deficit (-) / surplus (+) | (million euro) | 2 752     | 5 282     | 346       | -13 277   |
|                                      | % of GDP       | 1.7       | 3.0       | 0.2       | -7.1      |
| Government expenditure               | % of GDP       | 33.7      | 34.0      | 35.7      | 41.0      |
| Government revenue                   | % of GDP       | 35.4      | 37.0      | 35.9      | 33.8      |
| Government debt                      | (million euro) | 44 560    | 44 160    | 47 567    | 80 295    |
|                                      | % of GDP       | 27.5      | 24.9      | 25.0      | 43.2      |

**GDP, government deficit/surplus and debt in the EU (in national currencies)**

|                                      |                | 2005      | 2006      | 2007      | 2008      |
|--------------------------------------|----------------|-----------|-----------|-----------|-----------|
| <b>Greece</b>                        |                |           |           |           |           |
| GDP mp                               | (million euro) | 197 645   | 213 207   | 228 180   | 242 946   |
| Government deficit (-) / surplus (+) | (million euro) | -10 056   | -5 987    | -8 272    | -12 195   |
|                                      | % of GDP       | -5.1      | -2.8      | -3.6      | -5.0      |
| Government expenditure               | % of GDP       | 43.3      | 42.2      | 44.0      | 44.9      |
| Government revenue                   | % of GDP       | 38.1      | 39.1      | 40.1      | 40.0      |
| Government debt                      | (million euro) | 195 338   | 204 394   | 216 381   | 237 181   |
|                                      | % of GDP       | 98.8      | 95.9      | 94.8      | 97.6      |
| <b>Spain</b>                         |                |           |           |           |           |
| GDP mp                               | (million euro) | 908 792   | 982 303   | 1 050 595 | 1 095 163 |
| Government deficit (-) / surplus (+) | (million euro) | 8 759     | 19 847    | 23 259    | -41 874   |
|                                      | % of GDP       | 1.0       | 2.0       | 2.2       | -3.8      |
| Government expenditure               | % of GDP       | 38.4      | 38.5      | 38.8      | 40.5      |
| Government revenue                   | % of GDP       | 39.4      | 40.5      | 41.0      | 36.6      |
| Government debt                      | (million euro) | 391 028   | 389 393   | 380 736   | 432 523   |
|                                      | % of GDP       | 43.0      | 39.6      | 36.2      | 39.5      |
| <b>France</b>                        |                |           |           |           |           |
| GDP mp                               | (million euro) | 1 726 068 | 1 806 433 | 1 894 646 | 1 951 315 |
| Government deficit (-) / surplus (+) | (million euro) | -50 368   | -41 066   | -51 318   | -65 918   |
|                                      | % of GDP       | -2.9      | -2.3      | -2.7      | -3.4      |
| Government expenditure               | % of GDP       | 53.4      | 52.7      | 52.3      | 52.7      |
| Government revenue                   | % of GDP       | 50.4      | 50.4      | 49.6      | 49.3      |
| Government debt                      | (million euro) | 1 145 354 | 1 149 937 | 1 208 777 | 1 327 143 |
|                                      | % of GDP       | 66.4      | 63.7      | 63.8      | 68.0      |
| <b>Italy</b>                         |                |           |           |           |           |
| GDP mp                               | (million euro) | 1 429 479 | 1 485 377 | 1 544 915 | 1 572 243 |
| Government deficit (-) / surplus (+) | (million euro) | -61 432   | -49 312   | -23 225   | -42 979   |
|                                      | % of GDP       | -4.3      | -3.3      | -1.5      | -2.7      |
| Government expenditure               | % of GDP       | 48.2      | 48.7      | 47.9      | 48.7      |
| Government revenue                   | % of GDP       | 43.8      | 45.4      | 46.4      | 46.0      |
| Government debt                      | (million euro) | 1 512 779 | 1 582 009 | 1 598 975 | 1 663 650 |
|                                      | % of GDP       | 105.8     | 106.5     | 103.5     | 105.8     |
| <b>Cyprus</b>                        |                |           |           |           |           |
| GDP mp                               | (million euro) | 13 462    | 14 435    | 15 596    | 16 949    |
| Government deficit (-) / surplus (+) | (million euro) | -326      | -173      | 537       | 157       |
|                                      | % of GDP       | -2.4      | -1.2      | 3.4       | 0.9       |
| Government expenditure               | % of GDP       | 43.6      | 43.4      | 42.9      | 44.0      |
| Government revenue                   | % of GDP       | 41.2      | 42.2      | 46.4      | 44.9      |
| Government debt                      | (million euro) | 9 300     | 9 331     | 9 262     | 8 329     |
|                                      | % of GDP       | 69.1      | 64.6      | 59.4      | 49.1      |
| <b>Latvia</b>                        |                |           |           |           |           |
| GDP mp                               | (million LVL)  | 9 059     | 11 172    | 14 780    | 16 243    |
| Government deficit (-) / surplus (+) | (million LVL)  | -38       | -54       | -59       | -645      |
|                                      | % of GDP       | -0.4      | -0.5      | -0.4      | -4.0      |
| Government expenditure               | % of GDP       | 35.6      | 38.2      | 35.9      | 39.5      |
| Government revenue                   | % of GDP       | 35.2      | 37.7      | 35.5      | 35.5      |
| Government debt                      | (million LVL)  | 1 122     | 1 191     | 1 331     | 3 165     |
|                                      | % of GDP       | 12.4      | 10.7      | 9.0       | 19.5      |
| <b>Lithuania</b>                     |                |           |           |           |           |
| GDP mp                               | (million LTL)  | 72 060    | 82 793    | 98 139    | 111 499   |
| Government deficit (-) / surplus (+) | (million LTL)  | -362      | -371      | -1 001    | -3 590    |
|                                      | % of GDP       | -0.5      | -0.4      | -1.0      | -3.2      |
| Government expenditure               | % of GDP       | 33.3      | 33.6      | 34.9      | 37.2      |
| Government revenue                   | % of GDP       | 32.8      | 33.1      | 33.9      | 34.0      |
| Government debt                      | (million LTL)  | 13 276    | 14 939    | 16 698    | 17 375    |
|                                      | % of GDP       | 18.4      | 18.0      | 17.0      | 15.6      |

**GDP, government deficit/surplus and debt in the EU (in national currencies)**

|                                      |                | 2005       | 2006       | 2007       | 2008       |
|--------------------------------------|----------------|------------|------------|------------|------------|
| <b>Luxembourg</b>                    |                |            |            |            |            |
| GDP mp                               | (million euro) | 30 237     | 33 921     | 36 411     | 36 662     |
| Government deficit (-) / surplus (+) | (million euro) | 6          | 461        | 1 323      | 944        |
|                                      | % of GDP       | 0.0        | 1.4        | 3.6        | 2.6        |
| Government expenditure               | % of GDP       | 41.6       | 38.6       | 37.2       | 40.7       |
| Government revenue                   | % of GDP       | 41.6       | 39.9       | 40.8       | 43.3       |
| Government debt                      | (million euro) | 1 835      | 2 280      | 2 513      | 5 379      |
|                                      | % of GDP       | 6.1        | 6.7        | 6.9        | 14.7       |
| <b>Hungary</b>                       |                |            |            |            |            |
| GDP mp                               | (million HUF)  | 21 997 374 | 23 785 244 | 25 419 164 | 26 469 999 |
| Government deficit (-) / surplus (+) | (million HUF)  | -1 718 676 | -2 188 544 | -1 248 022 | -905 310   |
|                                      | % of GDP       | -7.8       | -9.2       | -4.9       | -3.4       |
| Government expenditure               | % of GDP       | 50.1       | 51.9       | 49.7       | 49.8       |
| Government revenue                   | % of GDP       | 42.3       | 42.7       | 44.8       | 46.5       |
| Government debt                      | (million HUF)  | 13 582 512 | 15 592 502 | 16 731 504 | 19 320 211 |
|                                      | % of GDP       | 61.7       | 65.6       | 65.8       | 73.0       |
| <b>Malta</b>                         |                |            |            |            |            |
| GDP mp                               | (million euro) | 4 806      | 5 110      | 5 445      | 5 665      |
| Government deficit (-) / surplus (+) | (million euro) | -138       | -131       | -120       | -267       |
|                                      | % of GDP       | -2.9       | -2.6       | -2.2       | -4.7       |
| Government expenditure               | % of GDP       | 44.7       | 43.7       | 42.6       | 45.3       |
| Government revenue                   | % of GDP       | 41.8       | 41.2       | 40.4       | 40.6       |
| Government debt                      | (million euro) | 3 355      | 3 254      | 3 379      | 3 630      |
|                                      | % of GDP       | 69.8       | 63.7       | 62.1       | 64.1       |
| <b>Netherlands</b>                   |                |            |            |            |            |
| GDP mp                               | (million euro) | 513 407    | 539 929    | 567 066    | 594 608    |
| Government deficit (-) / surplus (+) | (million euro) | -1 359     | 3 371      | 1 973      | 6 057      |
|                                      | % of GDP       | -0.3       | 0.6        | 0.3        | 1.0        |
| Government expenditure               | % of GDP       | 44.8       | 45.6       | 45.3       | 45.5       |
| Government revenue                   | % of GDP       | 44.5       | 46.2       | 45.6       | 46.4       |
| Government debt                      | (million euro) | 266 060    | 255 880    | 258 774    | 346 224    |
|                                      | % of GDP       | 51.8       | 47.4       | 45.6       | 58.2       |
| <b>Austria</b>                       |                |            |            |            |            |
| GDP mp                               | (million euro) | 244 453    | 257 294    | 270 837    | 282 202    |
| Government deficit (-) / surplus (+) | (million euro) | -3 843     | -4 144     | -1 448     | -1 098     |
|                                      | % of GDP       | -1.6       | -1.6       | -0.5       | -0.4       |
| Government expenditure               | % of GDP       | 49.9       | 49.4       | 48.7       | 48.7       |
| Government revenue                   | % of GDP       | 48.2       | 47.7       | 48.0       | 48.2       |
| Government debt                      | (million euro) | 155 753    | 159 484    | 161 012    | 176 420    |
|                                      | % of GDP       | 63.7       | 62.0       | 59.4       | 62.5       |
| <b>Poland</b>                        |                |            |            |            |            |
| GDP mp                               | (million PLN)  | 983 302    | 1 060 031  | 1 175 266  | 1 271 715  |
| Government deficit (-) / surplus (+) | (million PLN)  | -42 358    | -41 131    | -22 131    | -49 537    |
|                                      | % of GDP       | -4.3       | -3.9       | -1.9       | -3.9       |
| Government expenditure               | % of GDP       | 43.4       | 43.8       | 42.1       | 43.0       |
| Government revenue                   | % of GDP       | 39.1       | 39.9       | 40.2       | 39.2       |
| Government debt                      | (million PLN)  | 462 742    | 505 149    | 527 570    | 598 402    |
|                                      | % of GDP       | 47.1       | 47.7       | 44.9       | 47.1       |
| <b>Portugal</b>                      |                |            |            |            |            |
| GDP mp                               | (million euro) | 149 124    | 155 446    | 163 190    | 166 197    |
| Government deficit (-) / surplus (+) | (million euro) | -9 083     | -6 092     | -4 218     | -4 341     |
|                                      | % of GDP       | -6.1       | -3.9       | -2.6       | -2.6       |
| Government expenditure               | % of GDP       | 47.6       | 46.3       | 45.8       | 45.9       |
| Government revenue                   | % of GDP       | 41.6       | 42.3       | 43.1       | 43.2       |
| Government debt                      | (million euro) | 94 792     | 100 522    | 103 702    | 110 377    |
|                                      | % of GDP       | 63.6       | 64.7       | 63.5       | 66.4       |

**GDP, government deficit/surplus and debt in the EU (in national currencies)**

|                                                |                      | 2005             | 2006             | 2007             | 2008             |
|------------------------------------------------|----------------------|------------------|------------------|------------------|------------------|
| <b>Romania</b>                                 |                      |                  |                  |                  |                  |
| GDP mp                                         | (million RON)        | 288 955          | 344 651          | 412 762          | 503 959          |
| Government deficit (-) / surplus (+)           | (million RON)        | -3 344           | -7 474           | -10 466          | -27 295          |
|                                                | % of GDP             | -1.2             | -2.2             | -2.5             | -5.4             |
| Government expenditure                         | % of GDP             | 33.5             | 35.3             | 36.6             | 38.5             |
| Government revenue                             | % of GDP             | 32.3             | 33.1             | 34.0             | 33.1             |
| Government debt                                | (million RON)        | 45 626           | 42 583           | 52 292           | 68 532           |
|                                                | % of GDP             | 15.8             | 12.4             | 12.7             | 13.6             |
| <b>Slovenia</b>                                |                      |                  |                  |                  |                  |
| GDP mp                                         | (million euro)       | 28 704           | 31 008           | 34 471           | 37 126           |
| Government deficit (-) / surplus (+)           | (million euro)       | -412             | -404             | 163              | -351             |
|                                                | % of GDP             | -1.4             | -1.3             | 0.5              | -0.9             |
| Government expenditure                         | % of GDP             | 45.3             | 44.6             | 42.4             | 43.6             |
| Government revenue                             | % of GDP             | 43.8             | 43.3             | 42.9             | 42.7             |
| Government debt                                | (million euro)       | 7 755            | 8 289            | 8 071            | 8 473            |
|                                                | % of GDP             | 27.0             | 26.7             | 23.4             | 22.8             |
| <b>Slovakia</b>                                |                      |                  |                  |                  |                  |
| GDP mp                                         | (million euro)       | 49 315           | 55 082           | 61 501           | 67 331           |
| Government deficit (-) / surplus (+)           | (million euro)       | -1 387           | -1 902           | -1 143           | -1 477           |
|                                                | % of GDP             | -2.8             | -3.5             | -1.9             | -2.2             |
| Government expenditure                         | % of GDP             | 38.2             | 36.9             | 34.4             | 34.9             |
| Government revenue                             | % of GDP             | 35.4             | 33.5             | 32.5             | 32.7             |
| Government debt                                | (million euro)       | 16 847           | 16 769           | 18 053           | 18 613           |
|                                                | % of GDP             | 34.2             | 30.4             | 29.4             | 27.6             |
| <b>Finland</b>                                 |                      |                  |                  |                  |                  |
| GDP mp                                         | (million euro)       | 157 070          | 167 009          | 179 659          | 186 164          |
| Government deficit (-) / surplus (+)           | (million euro)       | 4 398            | 6 689            | 9 405            | 7 786            |
|                                                | % of GDP             | 2.8              | 4.0              | 5.2              | 4.2              |
| Government expenditure                         | % of GDP             | 50.3             | 48.7             | 47.3             | 48.4             |
| Government revenue                             | % of GDP             | 52.9             | 52.6             | 52.5             | 52.5             |
| Government debt                                | (million euro)       | 65 053           | 65 536           | 63 033           | 62 140           |
|                                                | % of GDP             | 41.4             | 39.2             | 35.1             | 33.4             |
| <b>Sweden</b>                                  |                      |                  |                  |                  |                  |
| GDP mp                                         | (million SEK)        | 2 735 218        | 2 900 790        | 3 063 873        | 3 157 832        |
| Government deficit (-) / surplus (+)           | (million SEK)        | 61 785           | 73 720           | 116 992          | 79 627           |
|                                                | % of GDP             | 2.3              | 2.5              | 3.8              | 2.5              |
| Government expenditure                         | % of GDP             | 55.2             | 54.1             | 52.5             | 53.1             |
| Government revenue                             | % of GDP             | 57.2             | 56.5             | 56.3             | 55.7             |
| Government debt                                | (million SEK)        | 1 395 833        | 1 330 624        | 1 240 782        | 1 200 617        |
|                                                | % of GDP             | 51.0             | 45.9             | 40.5             | 38.0             |
| <b>United Kingdom*</b>                         |                      |                  |                  |                  |                  |
| GDP mp                                         | (million GBP)        | 1 252 505        | 1 321 860        | 1 400 526        | 1 442 921        |
| Government deficit (-) / surplus (+)           | (million GBP)        | -42 500          | -35 498          | -37 734          | -78 996          |
|                                                | % of GDP             | -3.4             | -2.7             | -2.7             | -5.5             |
| Government expenditure                         | % of GDP             | 44.1             | 44.2             | 44.0             | 47.7             |
| Government revenue                             | % of GDP             | 40.8             | 41.6             | 41.4             | 42.3             |
| Government debt                                | (million GBP)        | 529 367          | 573 341          | 618 374          | 750 286          |
|                                                | % of GDP             | 42.3             | 43.4             | 44.2             | 52.0             |
| <i>Financial year (fy)</i>                     |                      | <b>2004/2005</b> | <b>2005/2006</b> | <b>2006/2007</b> | <b>2007/2008</b> |
| <i>GDP mp fy</i>                               | <i>(million GBP)</i> | <i>1 211 978</i> | <i>1 268 395</i> | <i>1 343 753</i> | <i>1 419 549</i> |
| <i>Government deficit (-) / surplus (+) fy</i> | <i>(million GBP)</i> | <i>-42 764</i>   | <i>-39 502</i>   | <i>-35 758</i>   | <i>-39 467</i>   |
|                                                | <i>% of GDP</i>      | <i>-3.5</i>      | <i>-3.1</i>      | <i>-2.7</i>      | <i>-2.8</i>      |
| <i>Government debt fy</i>                      | <i>(million GBP)</i> | <i>483 806</i>   | <i>531 482</i>   | <i>574 128</i>   | <i>613 912</i>   |
|                                                | <i>% of GDP</i>      | <i>39.9</i>      | <i>41.9</i>      | <i>42.7</i>      | <i>43.2</i>      |

\* Data refer to calendar years. Data referring to the financial year (1 April to 31 March), are shown in italics. For the United Kingdom, the relevant data for implementation of the excessive deficit procedure are financial year data.

## **Annex**

### **Main revisions between the October 2008 and April 2009 notifications**

Below are shown country specific explanations for the largest revisions in deficit and debt for 2005-2007 between the October 2008 and April 2009 notifications, as well as in GDP.

#### **Deficit**

**Czech Republic:** The decrease in the deficit for 2007 is due to the revision of data on accrual taxes, mainly excise duties on tobacco products.

**Denmark:** The decrease in the surplus for 2007 is mainly due to a downward revision of data on tax revenues.

**Latvia:** The increase in the deficit for 2006 and 2007 is due to updated source data for other central and local government bodies.

**Lithuania:** The decrease in the deficit for 2007 is due to updated source data on accrued current expenditure.

**Luxembourg:** The increase in the surplus for 2007 is due to updated source data.

**Malta:** The increase in the deficit for 2006 and 2007 is due to updated information on subsidies paid by government to Enemalta (2006 and 2007) and an adjustment for a delayed payment to social security (2007).

**Sweden:** The increase in the surplus for 2006 and 2007 is mainly due to updated source data relating to taxes and a downward correction of the GNI based contribution to the EU budget.

#### **Debt**

**Denmark:** The increase in government debt for 2005-2007 is due to a change in the recording of debt, guaranteed by government, relating to urban renewal.

#### **GDP**

The GDP notified in April 2009 for EDP purposes was revised by a number of Member States compared to that notified in October 2008, most notably for 2007 by **Latvia** (5.6% upwards) and **Romania** (2.0% upwards). Changes in GDP affect deficit and debt ratios due to the denominator effect.

**Revisions in government deficit/surplus and government debt ratios**  
from the October 2008 to the April 2009 notification

|                       |                                                    | Deficit/surplus* |             |             | Debt        |             |             |
|-----------------------|----------------------------------------------------|------------------|-------------|-------------|-------------|-------------|-------------|
|                       |                                                    | 2005             | 2006        | 2007        | 2005        | 2006        | 2007        |
| <b>Belgium</b>        | <b>Revision in deficit/surplus and debt ratios</b> | <b>-0.1</b>      | <b>0.0</b>  | <b>0.1</b>  | <b>0.1</b>  | <b>0.1</b>  | <b>0.1</b>  |
|                       | - due to revision of deficit/surplus or debt       | -0.1             | 0.0         | 0.1         | 0.1         | 0.1         | 0.1         |
|                       | - due to revision of GDP                           | 0.0              | 0.0         | 0.0         | 0.0         | 0.0         | 0.0         |
| <b>Bulgaria</b>       | <b>Revision in deficit/surplus and debt ratios</b> | <b>0.0</b>       | <b>0.0</b>  | <b>-0.1</b> | <b>0.0</b>  | <b>0.0</b>  | <b>0.0</b>  |
|                       | - due to revision of deficit/surplus or debt       | 0.0              | 0.0         | -0.1        | 0.0         | 0.0         | 0.0         |
|                       | - due to revision of GDP                           | 0.0              | 0.0         | 0.0         | 0.0         | 0.0         | 0.0         |
| <b>Czech Republic</b> | <b>Revision in deficit/surplus and debt ratios</b> | <b>0.0</b>       | <b>0.0</b>  | <b>0.4</b>  | <b>0.0</b>  | <b>0.0</b>  | <b>0.0</b>  |
|                       | - due to revision of deficit/surplus or debt       | 0.0              | 0.0         | 0.4         | 0.0         | 0.0         | 0.0         |
|                       | - due to revision of GDP                           | 0.0              | 0.0         | 0.0         | 0.0         | 0.0         | 0.0         |
| <b>Denmark</b>        | <b>Revision in deficit/surplus and debt ratios</b> | <b>0.0</b>       | <b>0.1</b>  | <b>-0.3</b> | <b>0.7</b>  | <b>0.8</b>  | <b>0.7</b>  |
|                       | - due to revision of deficit/surplus or debt       | 0.0              | 0.1         | -0.4        | 0.6         | 0.6         | 0.5         |
|                       | - due to revision of GDP                           | 0.0              | 0.0         | 0.0         | 0.1         | 0.2         | 0.1         |
| <b>Germany</b>        | <b>Revision in deficit/surplus and debt ratios</b> | <b>0.0</b>       | <b>0.0</b>  | <b>0.0</b>  | <b>0.0</b>  | <b>0.0</b>  | <b>0.0</b>  |
|                       | - due to revision of deficit/surplus or debt       | 0.0              | 0.0         | 0.0         | 0.0         | 0.0         | 0.0         |
|                       | - due to revision of GDP                           | 0.0              | 0.0         | 0.0         | 0.0         | 0.0         | 0.0         |
| <b>Estonia</b>        | <b>Revision in deficit/surplus and debt ratios</b> | <b>0.0</b>       | <b>0.0</b>  | <b>0.0</b>  | <b>0.0</b>  | <b>0.0</b>  | <b>0.0</b>  |
|                       | - due to revision of deficit/surplus or debt       | 0.0              | 0.0         | 0.0         | 0.0         | 0.0         | 0.0         |
|                       | - due to revision of GDP                           | 0.0              | 0.0         | 0.0         | 0.0         | 0.0         | 0.0         |
| <b>Ireland</b>        | <b>Revision in deficit/surplus and debt ratios</b> | <b>0.0</b>       | <b>0.0</b>  | <b>-0.1</b> | <b>0.2</b>  | <b>0.2</b>  | <b>0.2</b>  |
|                       | - due to revision of deficit/surplus or debt       | 0.0              | 0.0         | -0.1        | 0.2         | 0.2         | 0.2         |
|                       | - due to revision of GDP                           | 0.0              | 0.0         | 0.0         | 0.0         | 0.0         | 0.0         |
| <b>Greece</b>         | <b>Revision in deficit/surplus and debt ratios</b> | <b>0.0</b>       | <b>0.0</b>  | <b>-0.1</b> | <b>0.0</b>  | <b>0.0</b>  | <b>0.0</b>  |
|                       | - due to revision of deficit/surplus or debt       | 0.0              | 0.0         | -0.1        | 0.0         | 0.0         | 0.0         |
|                       | - due to revision of GDP                           | 0.0              | 0.0         | 0.0         | 0.0         | 0.0         | 0.0         |
| <b>Spain</b>          | <b>Revision in deficit/surplus and debt ratios</b> | <b>0.0</b>       | <b>0.0</b>  | <b>0.0</b>  | <b>0.0</b>  | <b>0.0</b>  | <b>0.1</b>  |
|                       | - due to revision of deficit/surplus or debt       | 0.0              | 0.0         | 0.0         | 0.0         | 0.0         | 0.1         |
|                       | - due to revision of GDP                           | 0.0              | 0.0         | 0.0         | 0.0         | 0.0         | 0.0         |
| <b>France</b>         | <b>Revision in deficit/surplus and debt ratios</b> | <b>0.0</b>       | <b>0.1</b>  | <b>-0.1</b> | <b>0.0</b>  | <b>0.0</b>  | <b>-0.1</b> |
|                       | - due to revision of deficit/surplus or debt       | 0.0              | 0.1         | -0.1        | 0.0         | 0.0         | 0.0         |
|                       | - due to revision of GDP                           | 0.0              | 0.0         | 0.0         | 0.0         | 0.0         | -0.1        |
| <b>Italy</b>          | <b>Revision in deficit/surplus and debt ratios</b> | <b>0.0</b>       | <b>0.1</b>  | <b>0.1</b>  | <b>-0.1</b> | <b>-0.4</b> | <b>-0.6</b> |
|                       | - due to revision of deficit/surplus or debt       | 0.0              | 0.0         | 0.1         | 0.0         | 0.0         | 0.0         |
|                       | - due to revision of GDP                           | 0.0              | 0.0         | 0.0         | -0.1        | -0.4        | -0.6        |
| <b>Cyprus</b>         | <b>Revision in deficit/surplus and debt ratios</b> | <b>0.0</b>       | <b>0.0</b>  | <b>0.0</b>  | <b>0.0</b>  | <b>0.0</b>  | <b>-0.1</b> |
|                       | - due to revision of deficit/surplus or debt       | 0.0              | 0.0         | 0.0         | 0.1         | 0.1         | 0.1         |
|                       | - due to revision of GDP                           | 0.0              | 0.0         | 0.0         | -0.1        | -0.1        | -0.2        |
| <b>Latvia</b>         | <b>Revision in deficit/surplus and debt ratios</b> | <b>-0.1</b>      | <b>-0.3</b> | <b>-0.5</b> | <b>0.0</b>  | <b>0.0</b>  | <b>-0.5</b> |
|                       | - due to revision of deficit/surplus or debt       | -0.1             | -0.3        | -0.5        | 0.0         | 0.0         | 0.0         |
|                       | - due to revision of GDP                           | 0.0              | 0.0         | 0.0         | 0.0         | 0.0         | -0.5        |
| <b>Lithuania</b>      | <b>Revision in deficit/surplus and debt ratios</b> | <b>0.0</b>       | <b>0.0</b>  | <b>0.2</b>  | <b>0.0</b>  | <b>0.0</b>  | <b>0.0</b>  |
|                       | - due to revision of deficit/surplus or debt       | 0.0              | 0.0         | 0.2         | 0.0         | 0.0         | 0.0         |
|                       | - due to revision of GDP                           | 0.0              | 0.0         | 0.0         | 0.0         | 0.0         | 0.0         |
| <b>Luxembourg</b>     | <b>Revision in deficit/surplus and debt ratios</b> | <b>0.1</b>       | <b>0.1</b>  | <b>0.4</b>  | <b>0.0</b>  | <b>0.2</b>  | <b>-0.1</b> |
|                       | - due to revision of deficit/surplus or debt       | 0.1              | 0.1         | 0.4         | 0.0         | 0.2         | 0.0         |
|                       | - due to revision of GDP                           | 0.0              | 0.0         | 0.0         | 0.0         | 0.0         | 0.0         |
| <b>Hungary</b>        | <b>Revision in deficit/surplus and debt ratios</b> | <b>0.0</b>       | <b>0.1</b>  | <b>0.1</b>  | <b>0.0</b>  | <b>0.0</b>  | <b>0.0</b>  |
|                       | - due to revision of deficit/surplus or debt       | 0.0              | 0.1         | 0.1         | 0.0         | 0.0         | 0.0         |
|                       | - due to revision of GDP                           | 0.0              | 0.0         | 0.0         | 0.0         | 0.0         | 0.0         |

\* Revisions to deficit/surplus ratios: a positive sign means an improved government balance relative to GDP, and a negative sign a worsening

**Revisions in government deficit/surplus and government debt ratios**  
from the October 2008 to the April 2009 notification

|                       |                                                    | Deficit/surplus* |             |             | Debt        |             |             |
|-----------------------|----------------------------------------------------|------------------|-------------|-------------|-------------|-------------|-------------|
|                       |                                                    | 2005             | 2006        | 2007        | 2005        | 2006        | 2007        |
| <b>Malta</b>          | <b>Revision in deficit/surplus and debt ratios</b> | <b>0.0</b>       | <b>-0.3</b> | <b>-0.4</b> | <b>-0.1</b> | <b>-0.2</b> | <b>-0.2</b> |
|                       | - due to revision of deficit/surplus or debt       | 0.0              | -0.3        | -0.4        | 0.0         | 0.0         | 0.2         |
|                       | - due to revision of GDP                           | 0.0              | 0.0         | 0.0         | -0.1        | -0.2        | -0.3        |
| <b>Netherlands</b>    | <b>Revision in deficit/surplus and debt ratios</b> | <b>0.0</b>       | <b>0.0</b>  | <b>0.0</b>  | <b>0.0</b>  | <b>0.0</b>  | <b>0.0</b>  |
|                       | - due to revision of deficit/surplus or debt       | 0.0              | 0.0         | 0.0         | 0.0         | 0.0         | 0.0         |
|                       | - due to revision of GDP                           | 0.0              | 0.0         | 0.0         | 0.0         | 0.0         | 0.0         |
| <b>Austria</b>        | <b>Revision in deficit/surplus and debt ratios</b> | <b>-0.1</b>      | <b>-0.1</b> | <b>-0.1</b> | <b>0.0</b>  | <b>0.0</b>  | <b>0.0</b>  |
|                       | - due to revision of deficit/surplus or debt       | -0.1             | -0.1        | -0.1        | 0.0         | 0.0         | 0.0         |
|                       | - due to revision of GDP                           | 0.0              | 0.0         | 0.0         | 0.0         | 0.0         | 0.0         |
| <b>Poland</b>         | <b>Revision in deficit/surplus and debt ratios</b> | <b>0.0</b>       | <b>-0.1</b> | <b>0.1</b>  | <b>0.0</b>  | <b>0.0</b>  | <b>0.0</b>  |
|                       | - due to revision of deficit/surplus or debt       | 0.0              | -0.1        | 0.1         | 0.0         | 0.0         | 0.0         |
|                       | - due to revision of GDP                           | 0.0              | 0.0         | 0.0         | 0.0         | 0.0         | 0.0         |
| <b>Portugal</b>       | <b>Revision in deficit/surplus and debt ratios</b> | <b>0.0</b>       | <b>0.0</b>  | <b>0.0</b>  | <b>0.0</b>  | <b>0.0</b>  | <b>0.0</b>  |
|                       | - due to revision of deficit/surplus or debt       | 0.0              | 0.0         | 0.0         | 0.0         | 0.0         | 0.0         |
|                       | - due to revision of GDP                           | 0.0              | 0.0         | 0.0         | 0.0         | 0.0         | 0.0         |
| <b>Romania</b>        | <b>Revision in deficit/surplus and debt ratios</b> | <b>0.1</b>       | <b>0.0</b>  | <b>0.1</b>  | <b>0.0</b>  | <b>0.0</b>  | <b>-0.3</b> |
|                       | - due to revision of deficit/surplus or debt       | 0.1              | 0.0         | 0.0         | 0.0         | 0.0         | 0.0         |
|                       | - due to revision of GDP                           | 0.0              | 0.0         | 0.1         | 0.0         | 0.0         | -0.3        |
| <b>Slovenia</b>       | <b>Revision in deficit/surplus and debt ratios</b> | <b>0.0</b>       | <b>-0.1</b> | <b>0.0</b>  | <b>0.0</b>  | <b>0.0</b>  | <b>0.0</b>  |
|                       | - due to revision of deficit/surplus or debt       | 0.0              | -0.1        | 0.0         | 0.0         | 0.0         | 0.0         |
|                       | - due to revision of GDP                           | 0.0              | 0.0         | 0.0         | 0.0         | 0.0         | 0.0         |
| <b>Slovakia</b>       | <b>Revision in deficit/surplus and debt ratios</b> | <b>0.0</b>       | <b>0.1</b>  | <b>0.1</b>  | <b>0.0</b>  | <b>0.0</b>  | <b>0.0</b>  |
|                       | - due to revision of deficit/surplus or debt       | 0.0              | 0.1         | 0.1         | 0.0         | 0.0         | 0.0         |
|                       | - due to revision of GDP                           | 0.0              | 0.0         | 0.0         | 0.0         | 0.0         | 0.0         |
| <b>Finland</b>        | <b>Revision in deficit/surplus and debt ratios</b> | <b>-0.1</b>      | <b>-0.1</b> | <b>-0.1</b> | <b>0.1</b>  | <b>0.0</b>  | <b>0.0</b>  |
|                       | - due to revision of deficit/surplus or debt       | -0.1             | -0.1        | -0.1        | 0.0         | 0.0         | -0.1        |
|                       | - due to revision of GDP                           | 0.0              | 0.0         | 0.0         | 0.1         | 0.0         | 0.0         |
| <b>Sweden</b>         | <b>Revision in deficit/surplus and debt ratios</b> | <b>-0.1</b>      | <b>0.2</b>  | <b>0.3</b>  | <b>0.1</b>  | <b>0.0</b>  | <b>0.1</b>  |
|                       | - due to revision of deficit/surplus or debt       | -0.1             | 0.2         | 0.2         | 0.1         | 0.0         | 0.0         |
|                       | - due to revision of GDP                           | 0.0              | 0.0         | 0.0         | 0.0         | 0.0         | 0.1         |
| <b>United Kingdom</b> | <b>Revision in deficit/surplus and debt ratios</b> | <b>0.0</b>       | <b>0.0</b>  | <b>0.1</b>  | <b>0.0</b>  | <b>0.0</b>  | <b>0.0</b>  |
|                       | - due to revision of deficit/surplus or debt       | 0.0              | 0.0         | 0.1         | 0.0         | 0.0         | 0.0         |
|                       | - due to revision of GDP                           | 0.0              | 0.0         | 0.0         | 0.0         | 0.0         | 0.0         |
| <b>EU27</b>           | <b>Revision in deficit/surplus and debt ratios</b> | <b>0.0</b>       | <b>0.0</b>  | <b>0.0</b>  | <b>0.0</b>  | <b>0.0</b>  | <b>-0.1</b> |
|                       | - due to revision of deficit/surplus or debt       | 0.0              | 0.0         | 0.0         | 0.0         | 0.0         | 0.0         |
|                       | - due to revision of GDP                           | 0.0              | 0.0         | 0.0         | 0.0         | 0.0         | -0.1        |

\* Revisions to deficit/surplus ratios: a positive sign means an improved government balance relative to GDP, and a negative sign a worsening.
