# Supplementary material
Source: publisher figshare collection journal article supplement (https://tandf.figshare.com/articles/dataset/_/4793563)
Supplement: Supplementary file 14 [file 1]

64/2013 - 22 April 2013

Provision of deficit and debt data for 2012 - first notification

## **Euro area and EU27 government deficit at 3.7% and 4.0% of GDP respectively**

**Government debt at 90.6% and 85.3%**

In 2012, the government deficit<sup>1</sup> of both the **euro area**<sup>2</sup> (EA17) and the **EU27** decreased in absolute terms compared with 2011, while the government debt<sup>1</sup> rose in both zones. In the **euro area** the government deficit to GDP ratio decreased from 4.2% in 2011<sup>3</sup> to 3.7% in 2012, and in the **EU27** from 4.4% to 4.0%. In the **euro area** the government debt to GDP ratio increased from 87.3% at the end of 2011 to 90.6% at the end of 2012, and in the **EU27** from 82.5% to 85.3%.

|                                      |                | 2009       | 2010       | 2011       | 2012       |
|--------------------------------------|----------------|------------|------------|------------|------------|
| <b>Euro area (EA17)</b>              |                |            |            |            |            |
| GDP market prices (mp)               | (million euro) | 8 922 346  | 9 174 671  | 9 424 842  | 9 490 586  |
| Government deficit (-) / surplus (+) | (million euro) | -567 420   | -569 408   | -391 417   | -352 683   |
|                                      | (% of GDP)     | -6.4       | -6.2       | -4.2       | -3.7       |
| Government expenditure               | (% of GDP)     | 51.2       | 51.0       | 49.5       | 49.9       |
| Government revenue                   | (% of GDP)     | 44.9       | 44.8       | 45.3       | 46.2       |
| Government debt                      | (million euro) | 7 136 526  | 7 831 371  | 8 225 807  | 8 600 983  |
|                                      | (% of GDP)     | 80.0       | 85.4       | 87.3       | 90.6       |
| <b>EU27</b>                          |                |            |            |            |            |
| GDP mp                               | (million euro) | 11 754 457 | 12 278 203 | 12 647 215 | 12 902 370 |
| Government deficit (-) / surplus (+) | (million euro) | -807 996   | -800 889   | -561 486   | -514 088   |
|                                      | (% of GDP)     | -6.9       | -6.5       | -4.4       | -4.0       |
| Government expenditure               | (% of GDP)     | 51.1       | 50.6       | 49.1       | 49.4       |
| Government revenue                   | (% of GDP)     | 44.2       | 44.1       | 44.7       | 45.4       |
| Government debt                      | (million euro) | 8 765 652  | 9 825 306  | 10 435 932 | 11 011 797 |
|                                      | (% of GDP)     | 74.6       | 80.0       | 82.5       | 85.3       |

In 2012 the lowest government deficits in percentage of GDP were recorded in **Estonia** (-0.3%), **Sweden** (-0.5%), **Bulgaria** and **Luxembourg** (both -0.8%) and **Latvia** (-1.2%), while **Germany** (+0.2%) registered a government surplus. Seventeen Member States had deficits higher than 3% of GDP: **Spain** (-10.6%), **Greece** (-10.0%), **Ireland** (-7.6%), **Portugal** (-6.4%), **Cyprus** and the **United Kingdom** (both -6.3%), **France** (-4.8%), the **Czech Republic** (-4.4%), **Slovakia** (-4.3%), the **Netherlands** (-4.1%), **Denmark** and **Slovenia** (both -4.0%), **Belgium** and **Poland** (both -3.9%), **Malta** (-3.3%), **Lithuania** (-3.2%) and **Italy** (-3.0%). In all, thirteen Member States recorded an improvement in their government balance relative to GDP in 2012 compared with 2011, twelve a worsening and two remained stable.

At the end of 2012, the lowest ratios of government debt to GDP were recorded in **Estonia** (10.1%), **Bulgaria** (18.5%), **Luxembourg** (20.8%), **Romania** (37.8%), **Sweden** (38.2%), **Latvia** and **Lithuania** (both 40.7%). Fourteen Member States had government debt ratios higher than 60% of GDP: **Greece** (156.9%), **Italy** (127.0%), **Portugal** (123.6%), **Ireland** (117.6%), **Belgium** (99.6%), **France** (90.2%), the **United Kingdom** (90.0%), **Cyprus** (85.8%), **Spain** (84.2%), **Germany** (81.9%), **Hungary** (79.2%), **Austria** (73.4%), **Malta** (72.1%) and the **Netherlands** (71.2%). In all, six Member States recorded an improvement in their government debt relative to GDP in 2012 compared with 2011 and twenty-one a worsening.

In 2012, government expenditure<sup>4</sup> in the **euro area** was equivalent to 49.9% of GDP and government revenue<sup>4</sup> to 46.2%. The figures for the **EU27** were 49.4% and 45.4% respectively. In both zones, the government expenditure and the government revenue ratio increased between 2011 and 2012.

### **Reservations on reported data<sup>5</sup>**

Eurostat has no reservations on the data reported by Member States.

### **Amendment by Eurostat to reported data<sup>6</sup>**

Eurostat has made no amendments to the data reported by Member States.

### **Other issues**

#### ***i. Intergovernmental lending***

For the purpose of proper consolidation of general government debt in European aggregates and to provide users with information, Eurostat is collecting and publishing data on government loans to other EU governments, including those made through the European Financial Stability Facility (EFSF). For 2012 the intergovernmental lending figures relate mainly to lending to Greece, Ireland and Portugal.

#### ***ii. Supplementary tables for the financial crisis***

Annex 2 contains supplementary tables for the financial crisis for the EU and the euro area. Eurostat publishes supplementary tables by Member State on its website:

[http://epp.eurostat.ec.europa.eu/portal/page/portal/government\\_finance\\_statistics/excessive\\_deficit/supplementary\\_tables\\_financial\\_turmoil](http://epp.eurostat.ec.europa.eu/portal/page/portal/government_finance_statistics/excessive_deficit/supplementary_tables_financial_turmoil).

These tables contain data on the "net revenue/cost for general government (impact on ESA95 government deficit)" and "outstanding amounts of assets, actual liabilities and contingent liabilities of government" in relation to government interventions in the context of the financial crisis for the years 2009 to 2012. See also the Eurostat decision on the statistical recording of public interventions to support financial institutions and financial markets during the financial crisis (Eurostat News Release 103/2009 of 15 July 2009) and subsequent guidance.

Eurostat also publishes a background note providing more information on the content of the supplementary tables and data findings at:

[http://epp.eurostat.ec.europa.eu/portal/page/portal/government\\_finance\\_statistics/documents/Background\\_note\\_fin\\_crisis\\_Apr\\_2013\\_final.pdf](http://epp.eurostat.ec.europa.eu/portal/page/portal/government_finance_statistics/documents/Background_note_fin_crisis_Apr_2013_final.pdf)

#### ***iii. Government deficit/surplus excluding the impacts of interventions to support financial institutions***

Eurostat publishes for the first time on its website, government deficit/surplus data for 2011 and 2012 excluding the impacts of government interventions to support financial institutions:

[http://epp.eurostat.ec.europa.eu/portal/page/portal/government\\_finance\\_statistics/documents/SIF-fin\\_crisis\\_impact-EDP.pdf](http://epp.eurostat.ec.europa.eu/portal/page/portal/government_finance_statistics/documents/SIF-fin_crisis_impact-EDP.pdf)

It should be noted that this adjusted measure of government deficit/surplus is only intended to be an improvement in the presentation of data for users.

#### ***iv. Stock of liabilities of trade credits and advances***

Eurostat publishes on its website, as complementary information on government liabilities, data on trade credits and advances, as reported by Member States for the years 2009 to 2012:

[http://epp.eurostat.ec.europa.eu/portal/page/portal/government\\_finance\\_statistics/documents/Note\\_on\\_AF.71L-Apr\\_2013.pdf](http://epp.eurostat.ec.europa.eu/portal/page/portal/government_finance_statistics/documents/Note_on_AF.71L-Apr_2013.pdf).

It should be noted that, according to Council Regulation (EC) 479/2009, as amended, the liabilities in trade credits and advances of government units are not part of "Maastricht debt".

#### ***v. Quarterly data on government debt***

Annex 3 contains data on the structure of the outstanding debt by component of the euro area and EU27 for the fourth quarter of 2012, and the changes in the government debt ratio as compared to the third quarter of 2012.

### **Background**

In this News Release, **Eurostat, the statistical office of the European Union**, is providing<sup>7</sup> government deficit and debt data based on figures reported in the **first 2013 notification** by EU Member States for the years 2009-2012, for the application of the excessive deficit procedure (EDP). This notification is based on the ESA95 system of national accounts. This News Release also includes data on government expenditure and revenue. Annex 1 shows the main revisions since the October 2012 News Release.

Eurostat will also be releasing information on the underlying government sector accounts, as well as on the contribution of deficit/surplus and other relevant factors to the variation in the debt level (stock-flow adjustment), on the government finance statistics section on its website:

[http://epp.eurostat.ec.europa.eu/portal/page/portal/government\\_finance\\_statistics/introduction](http://epp.eurostat.ec.europa.eu/portal/page/portal/government_finance_statistics/introduction)

1. According to the Protocol on the excessive deficit procedure annexed to the EC Treaty, government deficit (surplus) means the net borrowing (net lending) of the whole general government sector (central government, state government, local government and social security funds). It is calculated according to national accounts concepts (European System of Accounts, ESA95). Government debt is the consolidated gross debt of the whole general government sector outstanding at the end of the year (at nominal value).
  - Table of euro area and EU27 aggregates: the data are in euro. For those countries not belonging to the euro area, the rate of conversion into euro is as follows:
    - for deficit / surplus and GDP data, the annual average exchange rate;
    - for the stock of government debt, the end of year exchange rate.
  - Table of national data: these are in national currencies. For Estonia, data for the years prior to the adoption of the euro have been converted into euro according to the irrevocable conversion rate.
2. Euro area (EA17): Belgium, Germany, Estonia, Ireland, Greece, Spain, France, Italy, Cyprus, Luxembourg, Malta, Netherlands, Austria, Portugal, Slovenia, Slovakia and Finland. In the attached table, the euro area is defined as including Estonia for the full period, although Estonia joined the euro area on 1 January 2011.
3. In the previous provision of data for the excessive deficit procedure, the 2011 government deficits for the euro area and the EU27 were 4.1% and 4.4% of GDP respectively. The government debt of the euro area and the EU27 were 87.3% and 82.5% of GDP respectively. See News Release 149/2012 of 22 October 2012.
4. Government expenditure and revenue are reported to Eurostat under the ESA95 transmission programme. They are the sum of non-financial transactions by general government, and include both current and capital transactions. For definitions, see Council Regulation 2223/96, as amended. It should be noted that the government balance (i.e. the difference between total government revenue and expenditure) is not exactly the same under ESA95 as that for the purpose of the excessive deficit procedure (see Regulation (EC) 2558/2001 on the reclassification of settlements under swaps agreements and forward rate agreements).
5. The term "reservations" is defined in article 15 (1) of Council Regulation (EC) 479/2009, as amended. The Commission (Eurostat) expresses reservations when it has doubts on the quality of the reported data.
6. According to Article 15 (2) of Council Regulation (EC) 479/2009, as amended, the Commission (Eurostat) may amend actual data reported by Member States and provide the amended data and a justification of the amendment where there is evidence that actual data reported by Member States do not comply with the quality requirements (compliance with accounting rules, completeness, reliability, timeliness and consistency of statistical data).
7. According to Article 14 (1) of Council Regulation (EC) 479/2009, as amended, Eurostat provides the actual government deficit and debt data for the application of the Protocol on the excessive deficit procedure, within three weeks after the reporting deadlines. This provision of data shall be effected through publication.

*For further information on the methodology of statistics reported under the excessive deficit procedure, please see Council Regulation (EC) 479/2009, as amended by Council Regulation (EC) 679/2010 (consolidated version available at: <http://eur-lex.europa.eu/LexUriServ/LexUriServ.do?uri=CONSLEG:2009R0479:20100819:EN:PDF>), Council Regulation 2223/96, as amended (consolidated version available at: <http://eur-lex.europa.eu/LexUriServ/site/en/consleg/1996/R/01996R2223-20030807-en.pdf>) and the Eurostat publication "ESA95 manual on government deficit and debt", fifth edition, 2013: [http://epp.eurostat.ec.europa.eu/portal/page/portal/product\\_details/publication?p\\_product\\_code=KS-RA-13-001](http://epp.eurostat.ec.europa.eu/portal/page/portal/product_details/publication?p_product_code=KS-RA-13-001)*

Issued by:  
**Eurostat Press Office**

**Tim ALLEN**  
**Tel: +352-4301-33 444**  
**[eurostat-pressoffice@ec.europa.eu](mailto:eurostat-pressoffice@ec.europa.eu)**

Eurostat news releases on the internet: <http://ec.europa.eu/eurostat>  
Selected Principal European Economic Indicators: <http://ec.europa.eu/eurostat/euroindicators>

## GDP, government deficit/surplus and debt in the EU (in national currencies)

|                                                                           |                | 2009      | 2010      | 2011      | 2012      |
|---------------------------------------------------------------------------|----------------|-----------|-----------|-----------|-----------|
| <b>Belgium</b>                                                            |                |           |           |           |           |
| GDP mp                                                                    | (million euro) | 340 777   | 356 125   | 369 836   | 376 840   |
| Government deficit (-) / surplus (+)                                      | (million euro) | -18 935   | -13 430   | -13 777   | -14 852   |
|                                                                           | (% of GDP)     | -5.6      | -3.8      | -3.7      | -3.9      |
| Government expenditure                                                    | (% of GDP)     | 53.7      | 52.6      | 53.4      | 54.8      |
| Government revenue                                                        | (% of GDP)     | 48.1      | 48.7      | 49.5      | 50.8      |
| Government debt                                                           | (million euro) | 326 039   | 340 257   | 361 672   | 375 389   |
|                                                                           | (% of GDP)     | 95.7      | 95.5      | 97.8      | 99.6      |
| memo: intergovernmental lending<br>in the context of the financial crisis | (million euro) | 130       | 830       | 2 586     | 7 198     |
|                                                                           | (% of GDP)     | 0.0       | 0.2       | 0.7       | 1.9       |
| <b>Bulgaria</b>                                                           |                |           |           |           |           |
| GDP mp                                                                    | (million BGN)  | 68 322    | 70 511    | 75 308    | 77 582    |
| Government deficit (-) / surplus (+)                                      | (million BGN)  | -2 961    | -2 198    | -1 492    | -624      |
|                                                                           | (% of GDP)     | -4.3      | -3.1      | -2.0      | -0.8      |
| Government expenditure                                                    | (% of GDP)     | 41.4      | 37.4      | 35.6      | 35.7      |
| Government revenue                                                        | (% of GDP)     | 37.1      | 34.3      | 33.6      | 34.9      |
| Government debt                                                           | (million BGN)  | 9 992     | 11 453    | 12 291    | 14 390    |
|                                                                           | (% of GDP)     | 14.6      | 16.2      | 16.3      | 18.5      |
| memo: intergovernmental lending<br>in the context of the financial crisis | (million BGN)  | 0         | 0         | 0         | 0         |
|                                                                           | (% of GDP)     | 0.0       | 0.0       | 0.0       | 0.0       |
| <b>Czech Republic</b>                                                     |                |           |           |           |           |
| GDP mp                                                                    | (million CZK)  | 3 758 979 | 3 799 547 | 3 841 370 | 3 843 471 |
| Government deficit (-) / surplus (+)                                      | (million CZK)  | -218 331  | -182 711  | -124 943  | -169 003  |
|                                                                           | (% of GDP)     | -5.8      | -4.8      | -3.3      | -4.4      |
| Government expenditure                                                    | (% of GDP)     | 44.7      | 43.7      | 43.0      | 44.5      |
| Government revenue                                                        | (% of GDP)     | 38.9      | 39.0      | 39.8      | 40.1      |
| Government debt                                                           | (million CZK)  | 1 285 972 | 1 436 957 | 1 568 989 | 1 758 872 |
|                                                                           | (% of GDP)     | 34.2      | 37.8      | 40.8      | 45.8      |
| memo: intergovernmental lending<br>in the context of the financial crisis | (million CZK)  | 0         | 0         | 0         | 0         |
|                                                                           | (% of GDP)     | 0.0       | 0.0       | 0.0       | 0.0       |
| <b>Denmark</b>                                                            |                |           |           |           |           |
| GDP mp                                                                    | (million DKK)  | 1 664 790 | 1 761 116 | 1 791 518 | 1 816 737 |
| Government deficit (-) / surplus (+)                                      | (million DKK)  | -44 442   | -44 009   | -33 018   | -72 470   |
|                                                                           | (% of GDP)     | -2.7      | -2.5      | -1.8      | -4.0      |
| Government expenditure                                                    | (% of GDP)     | 58.1      | 57.7      | 57.6      | 59.6      |
| Government revenue                                                        | (% of GDP)     | 55.3      | 55.0      | 55.7      | 55.5      |
| Government debt                                                           | (million DKK)  | 677 175   | 752 829   | 831 147   | 832 455   |
|                                                                           | (% of GDP)     | 40.7      | 42.7      | 46.4      | 45.8      |
| memo: intergovernmental lending<br>in the context of the financial crisis | (million DKK)  | 0         | 0         | 0         | 1 500     |
|                                                                           | (% of GDP)     | 0.0       | 0.0       | 0.0       | 0.1       |
| <b>Germany</b>                                                            |                |           |           |           |           |
| GDP mp                                                                    | (million euro) | 2 374 500 | 2 496 200 | 2 592 600 | 2 643 900 |
| Government deficit (-) / surplus (+)                                      | (million euro) | -73 180   | -103 440  | -20 230   | 4 090     |
|                                                                           | (% of GDP)     | -3.1      | -4.1      | -0.8      | 0.2       |
| Government expenditure                                                    | (% of GDP)     | 48.2      | 47.7      | 45.3      | 45.0      |
| Government revenue                                                        | (% of GDP)     | 45.1      | 43.6      | 44.5      | 45.2      |
| Government debt                                                           | (million euro) | 1 768 919 | 2 056 089 | 2 085 181 | 2 166 278 |
|                                                                           | (% of GDP)     | 74.5      | 82.4      | 80.4      | 81.9      |
| memo: intergovernmental lending<br>in the context of the financial crisis | (million euro) | 784       | 6 049     | 19 994    | 56 091    |
|                                                                           | (% of GDP)     | 0.0       | 0.2       | 0.8       | 2.1       |

## GDP, government deficit/surplus and debt in the EU (in national currencies)

|                                                                           |                | 2009      | 2010      | 2011      | 2012      |
|---------------------------------------------------------------------------|----------------|-----------|-----------|-----------|-----------|
| <b>Estonia</b>                                                            |                |           |           |           |           |
| GDP mp                                                                    | (million euro) | 13 762    | 14 323    | 15 951    | 16 998    |
| Government deficit (-) / surplus (+)                                      | (million euro) | -275      | 27        | 186       | -46       |
|                                                                           | (% of GDP)     | -2.0      | 0.2       | 1.2       | -0.3      |
| Government expenditure                                                    | (% of GDP)     | 45.5      | 40.7      | 38.3      | 40.5      |
| Government revenue                                                        | (% of GDP)     | 43.5      | 40.9      | 39.5      | 40.2      |
| Government debt                                                           | (million euro) | 991       | 962       | 996       | 1 724     |
|                                                                           | (% of GDP)     | 7.2       | 6.7       | 6.2       | 10.1      |
| memo: intergovernmental lending<br>in the context of the financial crisis | (million euro) | 0         | 0         | 14        | 355       |
|                                                                           | (% of GDP)     | 0.0       | 0.0       | 0.1       | 2.1       |
| <b>Ireland</b>                                                            |                |           |           |           |           |
| GDP mp                                                                    | (million euro) | 161 275   | 156 487   | 158 993   | 163 595   |
| Government deficit (-) / surplus (+)                                      | (million euro) | -22 368   | -48 274   | -21 268   | -12 461   |
|                                                                           | (% of GDP)     | -13.9     | -30.8     | -13.4     | -7.6      |
| Government expenditure                                                    | (% of GDP)     | 48.6      | 66.1      | 48.1      | 42.1      |
| Government revenue                                                        | (% of GDP)     | 34.7      | 35.2      | 34.9      | 34.6      |
| Government debt                                                           | (million euro) | 104 544   | 144 164   | 169 226   | 192 461   |
|                                                                           | (% of GDP)     | 64.8      | 92.1      | 106.4     | 117.6     |
| memo: intergovernmental lending<br>in the context of the financial crisis | (million euro) | 0         | 347       | 347       | 347       |
|                                                                           | (% of GDP)     | 0.0       | 0.2       | 0.2       | 0.2       |
| <b>Greece</b>                                                             |                |           |           |           |           |
| GDP mp                                                                    | (million euro) | 231 081   | 222 151   | 208 532   | 193 749   |
| Government deficit (-) / surplus (+)                                      | (million euro) | -36 127   | -23 719   | -19 834   | -19 360   |
|                                                                           | (% of GDP)     | -15.6     | -10.7     | -9.5      | -10.0     |
| Government expenditure                                                    | (% of GDP)     | 54.0      | 51.4      | 52.0      | 54.8      |
| Government revenue                                                        | (% of GDP)     | 38.3      | 40.6      | 42.4      | 44.7      |
| Government debt                                                           | (million euro) | 299 685   | 329 515   | 355 172   | 303 918   |
|                                                                           | (% of GDP)     | 129.7     | 148.3     | 170.3     | 156.9     |
| memo: intergovernmental lending<br>in the context of the financial crisis | (million euro) | 0         | 0         | 0         | 0         |
|                                                                           | (% of GDP)     | 0.0       | 0.0       | 0.0       | 0.0       |
| <b>Spain</b>                                                              |                |           |           |           |           |
| GDP mp                                                                    | (million euro) | 1 048 060 | 1 048 883 | 1 063 355 | 1 049 525 |
| Government deficit (-) / surplus (+)                                      | (million euro) | -117 143  | -101 438  | -100 402  | -111 641  |
|                                                                           | (% of GDP)     | -11.2     | -9.7      | -9.4      | -10.6     |
| Government expenditure                                                    | (% of GDP)     | 46.3      | 46.3      | 45.2      | 47.0      |
| Government revenue                                                        | (% of GDP)     | 35.1      | 36.6      | 35.7      | 36.4      |
| Government debt                                                           | (million euro) | 565 082   | 644 692   | 736 468   | 883 873   |
|                                                                           | (% of GDP)     | 53.9      | 61.5      | 69.3      | 84.2      |
| memo: intergovernmental lending<br>in the context of the financial crisis | (million euro) | 0         | 2 598     | 8 717     | 24 542    |
|                                                                           | (% of GDP)     | 0.0       | 0.2       | 0.8       | 2.3       |
| <b>France</b>                                                             |                |           |           |           |           |
| GDP mp                                                                    | (million euro) | 1 885 763 | 1 936 720 | 2 001 398 | 2 033 648 |
| Government deficit (-) / surplus (+)                                      | (million euro) | -142 223  | -136 779  | -105 392  | -98 196   |
|                                                                           | (% of GDP)     | -7.5      | -7.1      | -5.3      | -4.8      |
| Government expenditure                                                    | (% of GDP)     | 56.8      | 56.6      | 55.9      | 56.6      |
| Government revenue                                                        | (% of GDP)     | 49.2      | 49.5      | 50.6      | 51.7      |
| Government debt                                                           | (million euro) | 1 493 385 | 1 594 977 | 1 716 887 | 1 833 810 |
|                                                                           | (% of GDP)     | 79.2      | 82.4      | 85.8      | 90.2      |
| memo: intergovernmental lending<br>in the context of the financial crisis | (million euro) | 0         | 4 448     | 14 989    | 42 090    |
|                                                                           | (% of GDP)     | 0.0       | 0.2       | 0.7       | 2.1       |

## GDP, government deficit/surplus and debt in the EU (in national currencies)

|                                                                           |                | 2009      | 2010      | 2011      | 2012      |
|---------------------------------------------------------------------------|----------------|-----------|-----------|-----------|-----------|
| <b>Italy</b>                                                              |                |           |           |           |           |
| GDP mp                                                                    | (million euro) | 1 519 695 | 1 551 886 | 1 578 497 | 1 565 916 |
| Government deficit (-) / surplus (+)                                      | (million euro) | -83 603   | -69 267   | -60 016   | -47 633   |
|                                                                           | (% of GDP)     | -5.5      | -4.5      | -3.8      | -3.0      |
| Government expenditure                                                    | (% of GDP)     | 51.9      | 50.4      | 49.9      | 50.6      |
| Government revenue                                                        | (% of GDP)     | 46.5      | 46.1      | 46.2      | 47.7      |
| Government debt                                                           | (million euro) | 1 769 254 | 1 851 252 | 1 907 392 | 1 988 658 |
|                                                                           | (% of GDP)     | 116.4     | 119.3     | 120.8     | 127.0     |
| memo: intergovernmental lending<br>in the context of the financial crisis | (million euro) | 0         | 3 909     | 13 118    | 36 932    |
|                                                                           | (% of GDP)     | 0.0       | 0.3       | 0.8       | 2.4       |
| <b>Cyprus</b>                                                             |                |           |           |           |           |
| GDP mp                                                                    | (million euro) | 16 854    | 17 406    | 17 979    | 17 887    |
| Government deficit (-) / surplus (+)                                      | (million euro) | -1 031    | -920      | -1 132    | -1 127    |
|                                                                           | (% of GDP)     | -6.1      | -5.3      | -6.3      | -6.3      |
| Government expenditure                                                    | (% of GDP)     | 46.2      | 46.2      | 46.0      | 46.3      |
| Government revenue                                                        | (% of GDP)     | 40.1      | 40.9      | 39.7      | 40.0      |
| Government debt                                                           | (million euro) | 9 865     | 10 675    | 12 778    | 15 350    |
|                                                                           | (% of GDP)     | 58.5      | 61.3      | 71.1      | 85.8      |
| memo: intergovernmental lending<br>in the context of the financial crisis | (million euro) | 0         | 43        | 144       | 405       |
|                                                                           | (% of GDP)     | 0.0       | 0.2       | 0.8       | 2.3       |
| <b>Latvia</b>                                                             |                |           |           |           |           |
| GDP mp                                                                    | (million LVL)  | 13 070    | 12 784    | 14 275    | 15 520    |
| Government deficit (-) / surplus (+)                                      | (million LVL)  | -1 277    | -1 041    | -509      | -187      |
|                                                                           | (% of GDP)     | -9.8      | -8.1      | -3.6      | -1.2      |
| Government expenditure                                                    | (% of GDP)     | 43.7      | 43.4      | 38.4      | 36.5      |
| Government revenue                                                        | (% of GDP)     | 34.0      | 35.3      | 34.9      | 35.2      |
| Government debt                                                           | (million LVL)  | 4 826     | 5 682     | 5 974     | 6 309     |
|                                                                           | (% of GDP)     | 36.9      | 44.4      | 41.9      | 40.7      |
| memo: intergovernmental lending<br>in the context of the financial crisis | (million LVL)  | 0         | 0         | 0         | 0         |
|                                                                           | (% of GDP)     | 0.0       | 0.0       | 0.0       | 0.0       |
| <b>Lithuania</b>                                                          |                |           |           |           |           |
| GDP mp                                                                    | (million LTL)  | 92 032    | 95 323    | 106 370   | 113 189   |
| Government deficit (-) / surplus (+)                                      | (million LTL)  | -8 682    | -6 869    | -5 848    | -3 666    |
|                                                                           | (% of GDP)     | -9.4      | -7.2      | -5.5      | -3.2      |
| Government expenditure                                                    | (% of GDP)     | 44.9      | 42.4      | 38.9      | 36.2      |
| Government revenue                                                        | (% of GDP)     | 35.5      | 35.2      | 33.3      | 32.9      |
| Government debt                                                           | (million LTL)  | 26 983    | 36 127    | 40 962    | 46 037    |
|                                                                           | (% of GDP)     | 29.3      | 37.9      | 38.5      | 40.7      |
| memo: intergovernmental lending<br>in the context of the financial crisis | (million LTL)  | 0         | 0         | 0         | 0         |
|                                                                           | (% of GDP)     | 0.0       | 0.0       | 0.0       | 0.0       |
| <b>Luxembourg</b>                                                         |                |           |           |           |           |
| GDP mp                                                                    | (million euro) | 36 027    | 39 906    | 42 625    | 44 426    |
| Government deficit (-) / surplus (+)                                      | (million euro) | -290      | -363      | -98       | -359      |
|                                                                           | (% of GDP)     | -0.8      | -0.9      | -0.2      | -0.8      |
| Government expenditure                                                    | (% of GDP)     | 44.6      | 42.9      | 41.8      | 43.0      |
| Government revenue                                                        | (% of GDP)     | 43.8      | 42.0      | 41.5      | 42.1      |
| Government debt                                                           | (million euro) | 5 527     | 7 673     | 7 804     | 9 232     |
|                                                                           | (% of GDP)     | 15.3      | 19.2      | 18.3      | 20.8      |
| memo: intergovernmental lending<br>in the context of the financial crisis | (million euro) | 0         | 55        | 183       | 516       |
|                                                                           | (% of GDP)     | 0.0       | 0.1       | 0.4       | 1.2       |

## GDP, government deficit/surplus and debt in the EU (in national currencies)

|                                                                           |                | 2009       | 2010       | 2011       | 2012       |
|---------------------------------------------------------------------------|----------------|------------|------------|------------|------------|
| <b>Hungary</b>                                                            |                |            |            |            |            |
| GDP mp                                                                    | (million HUF)  | 25 626 480 | 26 607 339 | 27 886 401 | 28 276 003 |
| Government deficit (-) / surplus (+)                                      | (million HUF)  | -1 187 117 | -1 143 338 | 1 194 947  | -531 585   |
|                                                                           | (% of GDP)     | -4.6       | -4.3       | 4.3        | -1.9       |
| Government expenditure                                                    | (% of GDP)     | 51.4       | 49.8       | 49.6       | 48.5       |
| Government revenue                                                        | (% of GDP)     | 46.9       | 45.4       | 53.8       | 46.5       |
| Government debt                                                           | (million HUF)  | 20 448 176 | 21 775 209 | 22 690 685 | 22 380 937 |
|                                                                           | (% of GDP)     | 79.8       | 81.8       | 81.4       | 79.2       |
| memo: intergovernmental lending<br>in the context of the financial crisis | (million HUF)  | 0          | 0          | 0          | 0          |
|                                                                           | (% of GDP)     | 0.0        | 0.0        | 0.0        | 0.0        |
| <b>Malta</b>                                                              |                |            |            |            |            |
| GDP mp                                                                    | (million euro) | 5 969      | 6 317      | 6 556      | 6 756      |
| Government deficit (-) / surplus (+)                                      | (million euro) | -220       | -226       | -183       | -226       |
|                                                                           | (% of GDP)     | -3.7       | -3.6       | -2.8       | -3.3       |
| Government expenditure                                                    | (% of GDP)     | 42.4       | 42.0       | 42.1       | 43.9       |
| Government revenue                                                        | (% of GDP)     | 38.7       | 38.4       | 39.3       | 40.5       |
| Government debt                                                           | (million euro) | 3 963      | 4 258      | 4 607      | 4 871      |
|                                                                           | (% of GDP)     | 66.4       | 67.4       | 70.3       | 72.1       |
| memo: intergovernmental lending<br>in the context of the financial crisis | (million euro) | 0          | 20         | 66         | 187        |
|                                                                           | (% of GDP)     | 0.0        | 0.3        | 1.0        | 2.8        |
| <b>Netherlands</b>                                                        |                |            |            |            |            |
| GDP mp                                                                    | (million euro) | 573 235    | 588 740    | 601 973    | 600 638    |
| Government deficit (-) / surplus (+)                                      | (million euro) | -32 074    | -30 118    | -27 009    | -24 405    |
|                                                                           | (% of GDP)     | -5.6       | -5.1       | -4.5       | -4.1       |
| Government expenditure                                                    | (% of GDP)     | 51.4       | 51.2       | 49.8       | 50.4       |
| Government revenue                                                        | (% of GDP)     | 45.8       | 46.1       | 45.4       | 46.4       |
| Government debt                                                           | (million euro) | 348 284    | 371 784    | 394 197    | 427 515    |
|                                                                           | (% of GDP)     | 60.8       | 63.1       | 65.5       | 71.2       |
| memo: intergovernmental lending<br>in the context of the financial crisis | (million euro) | 0          | 1 247      | 4 187      | 11 787     |
|                                                                           | (% of GDP)     | 0.0        | 0.2        | 0.7        | 2.0        |
| <b>Austria</b>                                                            |                |            |            |            |            |
| GDP mp                                                                    | (million euro) | 276 151    | 286 397    | 300 712    | 309 901    |
| Government deficit (-) / surplus (+)                                      | (million euro) | -11 330    | -12 866    | -7 385     | -7 684     |
|                                                                           | (% of GDP)     | -4.1       | -4.5       | -2.5       | -2.5       |
| Government expenditure                                                    | (% of GDP)     | 52.6       | 52.6       | 50.5       | 51.2       |
| Government revenue                                                        | (% of GDP)     | 48.5       | 48.1       | 48.0       | 48.7       |
| Government debt                                                           | (million euro) | 191 069    | 206 087    | 217 879    | 227 431    |
|                                                                           | (% of GDP)     | 69.2       | 72.0       | 72.5       | 73.4       |
| memo: intergovernmental lending<br>in the context of the financial crisis | (million euro) | 0          | 607        | 2 038      | 5 741      |
|                                                                           | (% of GDP)     | 0.0        | 0.2        | 0.7        | 1.9        |
| <b>Poland</b>                                                             |                |            |            |            |            |
| GDP mp                                                                    | (million PLN)  | 1 344 505  | 1 416 585  | 1 528 127  | 1 595 264  |
| Government deficit (-) / surplus (+)                                      | (million PLN)  | -99 596    | -111 291   | -76 094    | -62 698    |
|                                                                           | (% of GDP)     | -7.4       | -7.9       | -5.0       | -3.9       |
| Government expenditure                                                    | (% of GDP)     | 44.6       | 45.4       | 43.4       | 42.3       |
| Government revenue                                                        | (% of GDP)     | 37.2       | 37.6       | 38.4       | 38.4       |
| Government debt                                                           | (million PLN)  | 684 082    | 776 825    | 859 076    | 886 779    |
|                                                                           | (% of GDP)     | 50.9       | 54.8       | 56.2       | 55.6       |
| memo: intergovernmental lending<br>in the context of the financial crisis | (million PLN)  | 0          | 0          | 0          | 0          |
|                                                                           | (% of GDP)     | 0.0        | 0.0        | 0.0        | 0.0        |

## GDP, government deficit/surplus and debt in the EU (in national currencies)

|                                                                           |                | 2009    | 2010    | 2011    | 2012    |
|---------------------------------------------------------------------------|----------------|---------|---------|---------|---------|
| <b>Portugal</b>                                                           |                |         |         |         |         |
| GDP mp                                                                    | (million euro) | 168 529 | 172 859 | 171 065 | 165 409 |
| Government deficit (-) / surplus (+)                                      | (million euro) | -17 114 | -16 982 | -7 543  | -10 596 |
|                                                                           | (% of GDP)     | -10.2   | -9.8    | -4.4    | -6.4    |
| Government expenditure                                                    | (% of GDP)     | 49.8    | 51.5    | 49.4    | 47.4    |
| Government revenue                                                        | (% of GDP)     | 39.6    | 41.6    | 45.0    | 41.0    |
| Government debt                                                           | (million euro) | 141 055 | 162 473 | 185 241 | 204 485 |
|                                                                           | (% of GDP)     | 83.7    | 94.0    | 108.3   | 123.6   |
| memo: intergovernmental lending<br>in the context of the financial crisis | (million euro) | 0       | 548     | 1 212   | 1 212   |
|                                                                           | (% of GDP)     | 0.0     | 0.3     | 0.7     | 0.7     |
| <b>Romania</b>                                                            |                |         |         |         |         |
| GDP mp                                                                    | (million RON)  | 501 139 | 523 693 | 556 708 | 587 499 |
| Government deficit (-) / surplus (+)                                      | (million RON)  | -45 113 | -35 591 | -30 911 | -16 822 |
|                                                                           | (% of GDP)     | -9.0    | -6.8    | -5.6    | -2.9    |
| Government expenditure                                                    | (% of GDP)     | 41.1    | 40.1    | 39.4    | 36.4    |
| Government revenue                                                        | (% of GDP)     | 32.1    | 33.3    | 33.8    | 33.5    |
| Government debt                                                           | (million RON)  | 118 428 | 159 511 | 193 157 | 222 212 |
|                                                                           | (% of GDP)     | 23.6    | 30.5    | 34.7    | 37.8    |
| memo: intergovernmental lending<br>in the context of the financial crisis | (million RON)  | 0       | 0       | 0       | 0       |
|                                                                           | (% of GDP)     | 0.0     | 0.0     | 0.0     | 0.0     |
| <b>Slovenia</b>                                                           |                |         |         |         |         |
| GDP mp                                                                    | (million euro) | 35 556  | 35 607  | 36 172  | 35 466  |
| Government deficit (-) / surplus (+)                                      | (million euro) | -2 217  | -2 112  | -2 298  | -1 418  |
|                                                                           | (% of GDP)     | -6.2    | -5.9    | -6.4    | -4.0    |
| Government expenditure                                                    | (% of GDP)     | 49.3    | 50.4    | 50.8    | 49.0    |
| Government revenue                                                        | (% of GDP)     | 43.1    | 44.5    | 44.4    | 45.0    |
| Government debt                                                           | (million euro) | 12 449  | 13 737  | 16 954  | 19 189  |
|                                                                           | (% of GDP)     | 35.0    | 38.6    | 46.9    | 54.1    |
| memo: intergovernmental lending<br>in the context of the financial crisis | (million euro) | 0       | 103     | 325     | 972     |
|                                                                           | (% of GDP)     | 0.0     | 0.3     | 0.9     | 2.7     |
| <b>Slovakia</b>                                                           |                |         |         |         |         |
| GDP mp                                                                    | (million euro) | 62 794  | 65 869  | 69 108  | 71 463  |
| Government deficit (-) / surplus (+)                                      | (million euro) | -5 040  | -5 046  | -3 498  | -3 107  |
|                                                                           | (% of GDP)     | -8.0    | -7.7    | -5.1    | -4.3    |
| Government expenditure                                                    | (% of GDP)     | 41.6    | 40.0    | 38.3    | 37.4    |
| Government revenue                                                        | (% of GDP)     | 33.5    | 32.3    | 33.3    | 33.1    |
| Government debt                                                           | (million euro) | 22 331  | 26 998  | 29 911  | 37 245  |
|                                                                           | (% of GDP)     | 35.6    | 41.0    | 43.3    | 52.1    |
| memo: intergovernmental lending<br>in the context of the financial crisis | (million euro) | 0       | 0       | 173     | 1 494   |
|                                                                           | (% of GDP)     | 0.0     | 0.0     | 0.2     | 2.1     |
| <b>Finland</b>                                                            |                |         |         |         |         |
| GDP mp                                                                    | (million euro) | 172 318 | 178 796 | 189 489 | 194 469 |
| Government deficit (-) / surplus (+)                                      | (million euro) | -4 250  | -4 455  | -1 539  | -3 662  |
|                                                                           | (% of GDP)     | -2.5    | -2.5    | -0.8    | -1.9    |
| Government expenditure                                                    | (% of GDP)     | 56.1    | 55.8    | 55.0    | 56.0    |
| Government revenue                                                        | (% of GDP)     | 53.4    | 53.0    | 53.9    | 53.7    |
| Government debt                                                           | (million euro) | 74 997  | 86 974  | 92 849  | 103 131 |
|                                                                           | (% of GDP)     | 43.5    | 48.6    | 49.0    | 53.0    |
| memo: intergovernmental lending<br>in the context of the financial crisis | (million euro) | 0       | 392     | 1 316   | 3 708   |
|                                                                           | (% of GDP)     | 0.0     | 0.2     | 0.7     | 1.9     |

**GDP, government deficit/surplus and debt in the EU (in national currencies)**

|                                                                                   |                      | <b>2009</b>             | <b>2010</b>             | <b>2011</b>             | <b>2012</b>             |
|-----------------------------------------------------------------------------------|----------------------|-------------------------|-------------------------|-------------------------|-------------------------|
| <b>Sweden</b>                                                                     |                      |                         |                         |                         |                         |
| GDP mp                                                                            | (million SEK)        | 3 105 790               | 3 337 531               | 3 499 914               | 3 555 339               |
| Government deficit (-) / surplus (+)                                              | (million SEK)        | -22 216                 | 9 844                   | 7 160                   | -18 307                 |
|                                                                                   | (% of GDP)           | -0.7                    | 0.3                     | 0.2                     | -0.5                    |
| Government expenditure                                                            | (% of GDP)           | 54.9                    | 52.3                    | 51.2                    | 52.0                    |
| Government revenue                                                                | (% of GDP)           | 54.0                    | 52.3                    | 51.2                    | 51.3                    |
| Government debt                                                                   | (million SEK)        | 1 321 814               | 1 316 287               | 1 345 016               | 1 357 939               |
|                                                                                   | (% of GDP)           | 42.6                    | 39.4                    | 38.4                    | 38.2                    |
| memo: intergovernmental lending<br>in the context of the financial crisis         | (million SEK)        | 0                       | 0                       | 0                       | 2 575                   |
|                                                                                   | (% of GDP)           | 0.0                     | 0.0                     | 0.0                     | 0.1                     |
| <b>United Kingdom*</b>                                                            |                      |                         |                         |                         |                         |
| GDP mp                                                                            | (million GBP)        | 1 401 863               | 1 466 569               | 1 515 828               | 1 541 465               |
| Government deficit (-) / surplus (+)                                              | (million GBP)        | -160 841                | -149 553                | -118 632                | -97 794                 |
|                                                                                   | (% of GDP)           | -11.5                   | -10.2                   | -7.8                    | -6.3                    |
| Government expenditure                                                            | (% of GDP)           | 51.3                    | 50.4                    | 48.6                    | 48.5                    |
| Government revenue                                                                | (% of GDP)           | 39.9                    | 40.3                    | 40.8                    | 42.2                    |
| Government debt                                                                   | (million GBP)        | 950 849                 | 1 164 811               | 1 295 417               | 1 387 436               |
|                                                                                   | (% of GDP)           | 67.8                    | 79.4                    | 85.5                    | 90.0                    |
| memo: intergovernmental lending<br>in the context of the financial crisis         | (million GBP)        | 0                       | 0                       | 403                     | 2 016                   |
|                                                                                   | (% of GDP)           | 0.0                     | 0.0                     | 0.0                     | 0.1                     |
| <i>Financial year (fy)</i>                                                        |                      | <b><i>2009/2010</i></b> | <b><i>2010/2011</i></b> | <b><i>2011/2012</i></b> | <b><i>2012/2013</i></b> |
| <i>GDP mp</i>                                                                     | <i>(million GBP)</i> | 1 415 137               | 1 480 274               | 1 522 414               | 1 545 755               |
| <i>Government deficit (-) / surplus (+)</i>                                       | <i>(million GBP)</i> | -163 123                | -141 783                | -118 217                | -86 510                 |
|                                                                                   | <i>(% of GDP)</i>    | -11.5                   | -9.6                    | -7.8                    | -5.6                    |
| <i>Government debt</i>                                                            | <i>(million GBP)</i> | 1 046 095               | 1 184 830               | 1 315 391               | 1 401 579               |
|                                                                                   | <i>(% of GDP)</i>    | 73.9                    | 80.0                    | 86.4                    | 90.7                    |
| <i>memo: intergovernmental lending<br/>in the context of the financial crisis</i> | <i>(million GBP)</i> | 0                       | 0                       | 403                     | 2016                    |
|                                                                                   | <i>(% of GDP)</i>    | 0.0                     | 0.0                     | 0.0                     | 0.1                     |

\* Data refer to calendar years. Data referring to the financial year (1 April to 31 March), are shown in italics. For the United Kingdom, the relevant data for implementation of the excessive deficit procedure are financial year data.

## **Annex 1**

### **Main revisions between the October 2012 and the April 2013 notifications**

Below are shown country specific explanations for the largest revisions in deficit and debt for 2009-2011 between the October 2012 and the April 2013 notifications, as well as in GDP.

Since the October 2012 notification, there have been revisions of the 2011 government deficit of -0.2% of GDP in two Member States, of +0.2% of GDP in one and of between -0.1% and +0.1% in twenty-four.

#### **Deficit**

**Slovenia:** The increase in the deficit for 2009 and 2010 is due to a change in the accrual adjustments for taxes on production.

#### **Debt**

**Portugal:** The increase in the debt for 2009 and 2010 is mainly due to the recording of trade credits under factoring without recourse as government loans and to the inclusion of two public corporations in the general government sector.

#### **GDP**

The GDP for 2011 notified in April 2013 for EDP purposes was revised by a number of Member States compared with that notified in October 2012, in general by small amounts. A decrease of almost 4% of GDP has been notified by Romania. An increase of about 2% of GDP for 2009 and of more than 1% of GDP for 2010 has been notified by Malta. Changes in GDP affect deficit and debt ratios due to the denominator effect.

**Revisions in government deficit/surplus and government debt ratios**  
from the October 2012 to the April 2013 notification

|                |                                              | Deficit/surplus* |      |      | Debt |      |      |
|----------------|----------------------------------------------|------------------|------|------|------|------|------|
|                |                                              | 2009             | 2010 | 2011 | 2009 | 2010 | 2011 |
| Belgium        | Revision in deficit/surplus and debt ratios  | 0.0              | 0.0  | 0.0  | 0.0  | 0.0  | 0.0  |
|                | - due to revision of deficit/surplus or debt | 0.0              | 0.0  | 0.0  | 0.0  | 0.0  | 0.0  |
|                | - due to revision of GDP                     | 0.0              | 0.0  | 0.0  | 0.0  | 0.0  | 0.0  |
| Bulgaria       | Revision in deficit/surplus and debt ratios  | 0.0              | 0.0  | 0.1  | 0.0  | 0.0  | 0.0  |
|                | - due to revision of deficit/surplus or debt | 0.0              | 0.0  | 0.1  | 0.0  | 0.0  | 0.0  |
|                | - due to revision of GDP                     | 0.0              | 0.0  | 0.0  | 0.0  | 0.0  | 0.0  |
| Czech Republic | Revision in deficit/surplus and debt ratios  | 0.0              | 0.0  | 0.0  | 0.0  | 0.0  | 0.0  |
|                | - due to revision of deficit/surplus or debt | 0.0              | 0.0  | 0.0  | 0.0  | 0.0  | 0.0  |
|                | - due to revision of GDP                     | 0.0              | 0.0  | 0.0  | 0.0  | 0.0  | 0.0  |
| Denmark        | Revision in deficit/surplus and debt ratios  | 0.0              | 0.0  | 0.0  | 0.1  | -0.2 | -0.2 |
|                | - due to revision of deficit/surplus or debt | 0.0              | 0.0  | 0.0  | 0.0  | 0.0  | 0.0  |
|                | - due to revision of GDP                     | 0.0              | 0.0  | 0.0  | 0.1  | -0.2 | -0.2 |
| Germany        | Revision in deficit/surplus and debt ratios  | 0.0              | 0.0  | 0.0  | 0.0  | -0.1 | -0.1 |
|                | - due to revision of deficit/surplus or debt | 0.0              | 0.0  | 0.0  | 0.0  | -0.1 | -0.1 |
|                | - due to revision of GDP                     | 0.0              | 0.0  | 0.0  | 0.0  | 0.0  | 0.0  |
| Estonia        | Revision in deficit/surplus and debt ratios  | 0.0              | 0.0  | 0.0  | 0.0  | 0.0  | 0.1  |
|                | - due to revision of deficit/surplus or debt | 0.0              | 0.0  | 0.0  | 0.0  | 0.0  | 0.1  |
|                | - due to revision of GDP                     | 0.0              | 0.0  | 0.0  | 0.0  | 0.0  | 0.0  |
| Ireland        | Revision in deficit/surplus and debt ratios  | 0.1              | 0.0  | 0.0  | -0.1 | 0.0  | 0.0  |
|                | - due to revision of deficit/surplus or debt | 0.1              | 0.0  | 0.0  | -0.1 | 0.0  | 0.0  |
|                | - due to revision of GDP                     | 0.0              | 0.0  | 0.0  | 0.0  | 0.0  | 0.0  |
| Greece         | Revision in deficit/surplus and debt ratios  | 0.0              | 0.0  | -0.1 | 0.0  | 0.0  | -0.2 |
|                | - due to revision of deficit/surplus or debt | 0.0              | 0.0  | -0.1 | 0.0  | 0.0  | -0.2 |
|                | - due to revision of GDP                     | 0.0              | 0.0  | 0.0  | 0.0  | 0.0  | 0.0  |
| Spain          | Revision in deficit/surplus and debt ratios  | 0.0              | 0.0  | 0.0  | 0.0  | 0.0  | 0.0  |
|                | - due to revision of deficit/surplus or debt | 0.0              | 0.0  | 0.0  | 0.0  | 0.0  | 0.0  |
|                | - due to revision of GDP                     | 0.0              | 0.0  | 0.0  | 0.0  | 0.0  | 0.0  |
| France         | Revision in deficit/surplus and debt ratios  | 0.0              | 0.0  | -0.1 | 0.0  | 0.0  | -0.2 |
|                | - due to revision of deficit/surplus or debt | 0.0              | 0.0  | -0.1 | 0.0  | 0.0  | 0.0  |
|                | - due to revision of GDP                     | 0.0              | 0.0  | 0.0  | 0.0  | 0.0  | -0.2 |
| Italy          | Revision in deficit/surplus and debt ratios  | -0.1             | 0.0  | 0.1  | 0.0  | 0.1  | 0.1  |
|                | - due to revision of deficit/surplus or debt | -0.1             | 0.0  | 0.1  | 0.0  | 0.0  | 0.0  |
|                | - due to revision of GDP                     | 0.0              | 0.0  | 0.0  | 0.0  | 0.1  | 0.1  |
| Cyprus         | Revision in deficit/surplus and debt ratios  | 0.0              | 0.0  | 0.0  | 0.0  | 0.0  | 0.0  |
|                | - due to revision of deficit/surplus or debt | 0.0              | 0.0  | 0.0  | 0.0  | 0.0  | 0.0  |
|                | - due to revision of GDP                     | 0.0              | 0.0  | 0.0  | 0.0  | 0.0  | 0.0  |
| Latvia         | Revision in deficit/surplus and debt ratios  | 0.0              | 0.0  | -0.1 | 0.2  | -0.1 | -0.4 |
|                | - due to revision of deficit/surplus or debt | 0.0              | 0.0  | -0.1 | 0.2  | -0.1 | -0.4 |
|                | - due to revision of GDP                     | 0.0              | 0.0  | 0.0  | 0.0  | 0.0  | 0.0  |
| Lithuania      | Revision in deficit/surplus and debt ratios  | 0.0              | 0.0  | 0.0  | 0.0  | 0.0  | 0.0  |
|                | - due to revision of deficit/surplus or debt | 0.0              | 0.0  | 0.0  | 0.0  | 0.0  | 0.0  |
|                | - due to revision of GDP                     | 0.0              | 0.0  | 0.0  | 0.0  | 0.0  | 0.0  |
| Luxembourg     | Revision in deficit/surplus and debt ratios  | 0.0              | -0.1 | 0.1  | 0.0  | 0.0  | 0.0  |
|                | - due to revision of deficit/surplus or debt | 0.0              | -0.1 | 0.1  | 0.0  | 0.0  | 0.0  |
|                | - due to revision of GDP                     | 0.0              | 0.0  | 0.0  | 0.0  | 0.0  | 0.0  |

\* Revisions to deficit/surplus ratios: a positive sign means an improved government balance relative to GDP, and a negative sign a worsening.

**Revisions in government deficit/surplus and government debt ratios**  
from the October 2012 to the April 2013 notification

|                |                                              | Deficit/surplus* |      |      | Debt |      |      |
|----------------|----------------------------------------------|------------------|------|------|------|------|------|
|                |                                              | 2009             | 2010 | 2011 | 2009 | 2010 | 2011 |
| Hungary        | Revision in deficit/surplus and debt ratios  | 0.0              | 0.1  | -0.1 | 0.0  | 0.0  | 0.0  |
|                | - due to revision of deficit/surplus or debt | 0.0              | 0.1  | -0.1 | 0.0  | 0.0  | 0.0  |
|                | - due to revision of GDP                     | 0.0              | 0.0  | 0.0  | 0.0  | 0.0  | 0.0  |
| Malta          | Revision in deficit/surplus and debt ratios  | 0.2              | 0.0  | -0.1 | -1.3 | -0.9 | -0.6 |
|                | - due to revision of deficit/surplus or debt | 0.1              | 0.0  | -0.1 | 0.0  | 0.0  | 0.0  |
|                | - due to revision of GDP                     | 0.1              | 0.0  | 0.0  | -1.3 | -0.9 | -0.6 |
| Netherlands    | Revision in deficit/surplus and debt ratios  | 0.0              | 0.0  | 0.0  | 0.0  | 0.0  | 0.0  |
|                | - due to revision of deficit/surplus or debt | 0.0              | 0.0  | 0.0  | 0.0  | 0.0  | 0.0  |
|                | - due to revision of GDP                     | 0.0              | 0.0  | 0.0  | 0.0  | 0.0  | 0.0  |
| Austria        | Revision in deficit/surplus and debt ratios  | 0.0              | 0.0  | 0.1  | 0.0  | 0.0  | 0.0  |
|                | - due to revision of deficit/surplus or debt | 0.0              | 0.0  | 0.1  | 0.0  | 0.0  | 0.0  |
|                | - due to revision of GDP                     | 0.0              | 0.0  | 0.0  | 0.0  | 0.0  | 0.0  |
| Poland         | Revision in deficit/surplus and debt ratios  | 0.0              | 0.0  | 0.1  | 0.0  | 0.0  | -0.2 |
|                | - due to revision of deficit/surplus or debt | 0.0              | 0.0  | 0.0  | 0.0  | 0.0  | 0.0  |
|                | - due to revision of GDP                     | 0.0              | 0.0  | 0.0  | 0.0  | 0.0  | -0.2 |
| Portugal       | Revision in deficit/surplus and debt ratios  | 0.0              | 0.0  | 0.0  | 0.5  | 0.4  | 0.2  |
|                | - due to revision of deficit/surplus or debt | 0.0              | 0.0  | 0.0  | 0.5  | 0.5  | 0.3  |
|                | - due to revision of GDP                     | 0.0              | 0.0  | 0.0  | 0.0  | -0.1 | -0.1 |
| Romania        | Revision in deficit/surplus and debt ratios  | 0.0              | 0.0  | 0.0  | 0.0  | 0.0  | 1.3  |
|                | - due to revision of deficit/surplus or debt | 0.0              | 0.0  | 0.2  | 0.0  | 0.0  | 0.0  |
|                | - due to revision of GDP                     | 0.0              | 0.0  | -0.2 | 0.0  | 0.0  | 1.3  |
| Slovenia       | Revision in deficit/surplus and debt ratios  | -0.3             | -0.2 | 0.0  | 0.0  | 0.0  | 0.0  |
|                | - due to revision of deficit/surplus or debt | -0.3             | -0.2 | 0.0  | 0.0  | 0.0  | 0.0  |
|                | - due to revision of GDP                     | 0.0              | 0.0  | 0.0  | 0.0  | 0.0  | 0.0  |
| Slovakia       | Revision in deficit/surplus and debt ratios  | 0.0              | 0.0  | -0.1 | 0.0  | 0.0  | 0.0  |
|                | - due to revision of deficit/surplus or debt | 0.0              | 0.0  | -0.1 | 0.0  | 0.0  | 0.0  |
|                | - due to revision of GDP                     | 0.0              | 0.0  | 0.0  | 0.0  | 0.0  | 0.0  |
| Finland        | Revision in deficit/surplus and debt ratios  | 0.0              | 0.0  | -0.2 | 0.0  | 0.0  | 0.0  |
|                | - due to revision of deficit/surplus or debt | 0.0              | 0.0  | -0.2 | 0.0  | 0.0  | 0.0  |
|                | - due to revision of GDP                     | 0.0              | 0.0  | 0.0  | 0.0  | 0.0  | 0.0  |
| Sweden         | Revision in deficit/surplus and debt ratios  | 0.0              | 0.0  | -0.1 | 0.0  | 0.0  | 0.0  |
|                | - due to revision of deficit/surplus or debt | 0.0              | 0.0  | -0.2 | 0.0  | 0.0  | 0.0  |
|                | - due to revision of GDP                     | 0.0              | 0.0  | 0.0  | 0.0  | 0.0  | 0.0  |
| United Kingdom | Revision in deficit/surplus and debt ratios  | 0.0              | 0.0  | 0.0  | 0.0  | 0.0  | 0.4  |
|                | - due to revision of deficit/surplus or debt | 0.0              | 0.0  | 0.0  | 0.0  | 0.0  | 0.2  |
|                | - due to revision of GDP                     | 0.0              | 0.0  | 0.0  | 0.0  | 0.0  | 0.2  |
| EU27           | Revision in deficit/surplus and debt ratios  | 0.0              | 0.0  | 0.0  | 0.0  | 0.0  | 0.0  |
|                | - due to revision of deficit/surplus or debt | 0.0              | 0.0  | 0.0  | 0.0  | 0.0  | 0.0  |
|                | - due to revision of GDP                     | 0.0              | 0.0  | 0.0  | 0.0  | 0.0  | 0.0  |
| EA17           | Revision in deficit/surplus and debt ratios  | 0.0              | 0.0  | 0.0  | 0.0  | 0.0  | -0.1 |
|                | - due to revision of deficit/surplus or debt | 0.0              | 0.0  | 0.0  | 0.0  | 0.0  | 0.0  |
|                | - due to revision of GDP                     | 0.0              | 0.0  | 0.0  | 0.0  | 0.0  | 0.0  |

\* Revisions to deficit/surplus ratios: a positive sign means an improved government balance relative to GDP, and a negative sign a worsening.

## Annex 2

### Supplementary tables for the financial crisis Activities undertaken by government to support financial institutions<sup>1</sup>

**Table 1: Net revenue/cost for general government recorded in ESA95 government deficit**  
Millions of euro

|          |                                                                      | Euro area (EA17) |                |               |                | EU27           |                |               |                |
|----------|----------------------------------------------------------------------|------------------|----------------|---------------|----------------|----------------|----------------|---------------|----------------|
|          |                                                                      | 2009             | 2010           | 2011          | 2012           | 2009           | 2010           | 2011          | 2012           |
| <b>A</b> | <b>Revenue (a+b+c+d)</b>                                             | <b>9 533</b>     | <b>14 422</b>  | <b>19 705</b> | <b>19 380</b>  | <b>21 108</b>  | <b>21 180</b>  | <b>27 007</b> | <b>24 141</b>  |
| a)       | Guarantee fees receivable                                            | 3 374            | 6 164          | 6 035         | 5 788          | 6 563          | 9 119          | 8 927         | 7 058          |
| b)       | Interest receivable                                                  | 4 828            | 6 527          | 10 333        | 10 290         | 6 259          | 9 779          | 14 038        | 13 710         |
| c)       | Dividends receivable                                                 | 1 238            | 1 472          | 2 650         | 2 213          | 1 238          | 1 544          | 3 349         | 2 285          |
| d)       | Other                                                                | 93               | 259            | 688           | 1 089          | 7 049          | 738            | 694           | 1 089          |
| <b>B</b> | <b>Expenditure (e+f+g+h)</b>                                         | <b>16 665</b>    | <b>80 671</b>  | <b>29 190</b> | <b>73 212</b>  | <b>36 206</b>  | <b>85 493</b>  | <b>34 786</b> | <b>77 552</b>  |
| e)       | Interest payable <sup>2</sup>                                        | 6 276            | 9 327          | 11 800        | 11 569         | 9 804          | 12 625         | 14 475        | 14 583         |
| f)       | Capital injections recorded as deficit-increasing (capital transfer) | 10 097           | 35 609         | 14 816        | 48 060         | 23 027         | 35 815         | 15 193        | 48 159         |
| g)       | Calls on guarantees                                                  | 0                | 450            | 492           | 4              | 0              | 450            | 1 582         | 4              |
| h)       | Other                                                                | 292              | 35 285         | 2 083         | 13 579         | 3 375          | 36 604         | 3 536         | 14 807         |
| <b>C</b> | <b>Net revenue/cost for general government (A-B)</b>                 | <b>-7 132</b>    | <b>-66 249</b> | <b>-9 485</b> | <b>-53 832</b> | <b>-15 098</b> | <b>-64 313</b> | <b>-7 779</b> | <b>-53 411</b> |
|          | <b>Net revenue/cost for general government (A-B) (% of GDP)</b>      | <b>-0.08</b>     | <b>-0.72</b>   | <b>-0.10</b>  | <b>-0.57</b>   | <b>-0.13</b>   | <b>-0.52</b>   | <b>-0.06</b>  | <b>-0.41</b>   |

Source: Eurostat

**Table 2: Outstanding amount of assets, actual liabilities<sup>4</sup> and contingent liabilities of general government**  
Millions of euro<sup>3</sup>

|                            |                                                         |                                                                                  | Euro area (EA17) |                |                |                | EU27             |                  |                |                |
|----------------------------|---------------------------------------------------------|----------------------------------------------------------------------------------|------------------|----------------|----------------|----------------|------------------|------------------|----------------|----------------|
|                            |                                                         |                                                                                  | 2009             | 2010           | 2011           | 2012           | 2009             | 2010             | 2011           | 2012           |
| General government         | Assets<br>(D=a+b+c)                                     | <b>D Closing balance sheet</b>                                                   | <b>211 031</b>   | <b>387 149</b> | <b>349 037</b> | <b>360 957</b> | <b>306 248</b>   | <b>584 510</b>   | <b>501 618</b> | <b>535 180</b> |
|                            |                                                         | a Loans                                                                          | 25 694           | 24 903         | 28 698         | 45 854         | 61 251           | 133 623          | 127 438        | 132 868        |
|                            |                                                         | b Securities other than shares                                                   | 80 109           | 245 779        | 223 088        | 215 997        | 86 284           | 263 101          | 239 683        | 230 042        |
|                            |                                                         | c Shares and other equity                                                        | 105 228          | 116 468        | 97 251         | 99 107         | 158 713          | 187 786          | 134 497        | 172 270        |
|                            | Liabilities<br>(E=d+e)                                  | <b>E Closing balance sheet recorded in ESA95 government debt</b>                 | <b>221 879</b>   | <b>468 358</b> | <b>454 412</b> | <b>523 585</b> | <b>360 696</b>   | <b>641 493</b>   | <b>613 909</b> | <b>669 660</b> |
|                            |                                                         | d Loans                                                                          | 39 472           | 244 535        | 211 928        | 191 899        | 41 230           | 245 530          | 212 427        | 191 899        |
|                            |                                                         | e Securities other than shares <sup>4</sup>                                      | 182 407          | 223 824        | 242 484        | 331 686        | 319 466          | 395 963          | 401 482        | 477 761        |
| Outside general government | Contingent liabilities<br>(F=f+g+h)                     | <b>F Closing balance sheet not recorded in ESA 95 debt</b>                       | <b>774 093</b>   | <b>579 924</b> | <b>575 291</b> | <b>577 520</b> | <b>1 428 997</b> | <b>1 051 839</b> | <b>903 671</b> | <b>600 132</b> |
|                            |                                                         | f Liabilities and assets outside general government under guarantee <sup>5</sup> | 691 012          | 473 003        | 489 857        | 521 787        | 1 114 304        | 806 634          | 723 082        | 534 244        |
|                            |                                                         | g Securities issued under liquidity schemes <sup>6</sup>                         | 4 617            | 7 939          | 2 708          | 2 761          | 236 228          | 145 029          | 97 285         | 12 338         |
|                            |                                                         | h Special purpose entities <sup>7</sup>                                          | 78 465           | 98 982         | 82 726         | 52 972         | 78 465           | 100 176          | 83 304         | 53 550         |
| (% of GDP)                 | <b>D Closing balance sheet - assets</b>                 |                                                                                  | <b>2.4</b>       | <b>4.2</b>     | <b>3.7</b>     | <b>3.8</b>     | <b>2.6</b>       | <b>4.8</b>       | <b>4.0</b>     | <b>4.1</b>     |
|                            | <b>E Closing balance sheet - liabilities</b>            |                                                                                  | <b>2.5</b>       | <b>5.1</b>     | <b>4.8</b>     | <b>5.5</b>     | <b>3.1</b>       | <b>5.2</b>       | <b>4.9</b>     | <b>5.2</b>     |
|                            | <b>F Closing balance sheet - contingent liabilities</b> |                                                                                  | <b>8.7</b>       | <b>6.3</b>     | <b>6.1</b>     | <b>6.1</b>     | <b>12.2</b>      | <b>8.6</b>       | <b>7.1</b>     | <b>4.7</b>     |

Source: Eurostat

The supplementary tables for the financial crisis aim to give a complete picture of the actual and potential impact on government deficit and debt due to government interventions directly related to the support of financial institutions. Support measures for non financial institutions or general economic support measures are not included in the tables.

The first table relates to data on transactions which are recorded in government accounts and have an actual impact on the EDP deficit/surplus. The second table relates to data on stocks of financial assets and liabilities arising from interventions relating to support of financial institutions. It distinguishes between activities which have contributed to government liabilities (included in government debt) and activities which may potentially contribute to government liabilities in the future, but which are currently recorded as contingent on future events (not included for the moment in government debt).

In particular, line C in table 1 shows the net impact in terms of government surplus/deficit for government due to direct government interventions in the financial crisis. It can be seen that government interventions in the context of the financial crisis increased the government deficit in the **EU27** by 53.4 bn euro (0.4% of GDP) in 2012. For the **euro area**, the net impact amounted to 53.8 bn (0.6% of GDP) in 2012.

Table 2 shows that the impact on government debt in 2012 (closing balance sheet for liabilities) for the **EU27** was 669.7 bn euro (5.2% of GDP), while for the **euro area** the figure was 523.6 bn (5.5% of GDP). As far as contingent liabilities are concerned (with a potential impact on debt and possibly on deficit), they amounted to 600.1 bn (4.7% of GDP) for the **EU27** and to 577.5 bn (6.1% of GDP) for the **euro area**.

Further tables on actual and potential impact on government deficit and debt, by Member State, can be found on Eurostat's website at:

[http://epp.eurostat.ec.europa.eu/portal/page/portal/government\\_finance\\_statistics/excessive\\_deficit/supplementary\\_tables\\_financial\\_turmoil](http://epp.eurostat.ec.europa.eu/portal/page/portal/government_finance_statistics/excessive_deficit/supplementary_tables_financial_turmoil)

1. These tables relate to activities undertaken to support financial institutions. They do not include wider economic stimulus packages.
2. Interest payable includes actual interest where relevant, and otherwise imputed interest on financing.
3. The appropriate valuation for all entries in Table 2 is nominal value, except for ordinary quoted shares held as assets (which are recorded at market value).
4. By convention, for the liabilities entry under "general government" (which is the impact on Maastricht Debt from activities to support financial institutions), there is assumed to be a direct impact on government debt from activities which imply a transfer of cash from government (e.g. transfer of cash relating to capital injections, loans granted, purchase of financial assets), except for the impact from direct borrowing. In addition, imputations relating to the financing costs should be included.
5. Guarantees covered are those granted by general government to non-general government financial institutions. It does not include guarantees on bank deposits, or guarantees on the liabilities of special purpose entities included in (h). It is only the value of active guarantees, not announced ceilings for schemes. It also includes guarantees on assets, which would imply incurrence of government liability in case of a call.
6. Liquidity schemes included here are those where the government securities used are not recorded in government debt (see the Eurostat Decision and accompanying guidance note for details). By convention, they are recorded as "contingent liabilities outside the general government", as for guarantees, though it should be noted that the exposure of government is likely to be limited.
7. Special purpose entities included here are those where government has a significant role, including a guarantee, but which are classified outside the general government sector (see the Eurostat Decision and accompanying guidance note for details). Their liabilities are recorded outside the general government sector (as contingent liabilities of general government).

## Annex 3

### Quarterly government debt

From the end of the third quarter to the end of the fourth quarter of 2012, the government debt to GDP ratio in the **euro area** (EA17) increased from 90.0% to 90.6% of GDP. In the **EU27** the ratio increased from 85.2% to 85.3%.

**Table 1: Quarterly government debt structure, 2012Q4 compared with 2012Q3**

|                                                                        |                   |  | 2012Q3     | 2012Q4     |
|------------------------------------------------------------------------|-------------------|--|------------|------------|
| <b>EA17</b>                                                            |                   |  |            |            |
| Government debt                                                        | (million euro)    |  | 8 527 556  | 8 600 983  |
|                                                                        | (% of GDP)        |  | 90.0       | 90.6       |
| Of which: Currency and deposits                                        | (million euro)    |  | 241 193    | 243 114    |
|                                                                        | (% of total debt) |  | 2.8        | 2.8        |
| Securities other than shares                                           | (million euro)    |  | 6 717 749  | 6 708 574  |
|                                                                        | (% of total debt) |  | 78.8       | 78.0       |
| Loans                                                                  | (million euro)    |  | 1 568 615  | 1 649 295  |
|                                                                        | (% of total debt) |  | 18.4       | 19.2       |
| Memo: Intergovernmental lending in the context of the financial crisis | (million euro)    |  | 158 484    | 193 576    |
|                                                                        | (% of GDP)        |  | 1.7        | 2.0        |
| <b>EU27</b>                                                            |                   |  |            |            |
| Government debt                                                        | (million euro)    |  | 10 932 706 | 11 011 797 |
|                                                                        | (% of GDP)        |  | 85.2       | 85.3       |
| Of which: Currency and deposits                                        | (million euro)    |  | 419 943    | 418 562    |
|                                                                        | (% of total debt) |  | 3.8        | 3.8        |
| Securities other than shares                                           | (million euro)    |  | 8 778 836  | 8 778 752  |
|                                                                        | (% of total debt) |  | 80.3       | 79.7       |
| Loans                                                                  | (million euro)    |  | 1 733 927  | 1 814 484  |
|                                                                        | (% of total debt) |  | 15.9       | 16.5       |
| Memo: Intergovernmental lending in the context of the financial crisis | (million euro)    |  | 160 856    | 196 547    |
|                                                                        | (% of GDP)        |  | 1.3        | 1.5        |

Compared with the third quarter of 2012, seventeen Member States registered an increase in their debt to GDP ratio at the end of the fourth quarter of 2012, nine a decrease and one remained stable. The highest increases in the ratio were recorded in **Spain** (+6.8 percentage points - pp), **Slovenia** (+5.9 pp) and **Greece** (+5.0 pp), and the largest decreases in **Belgium** (-2.0 pp), **Denmark** (-1.6 pp) and **Malta** (-1.0 pp).

**Figure 1: Changes in government debt to GDP ratio, 2012Q4 compared with 2012Q3, in percentage points**

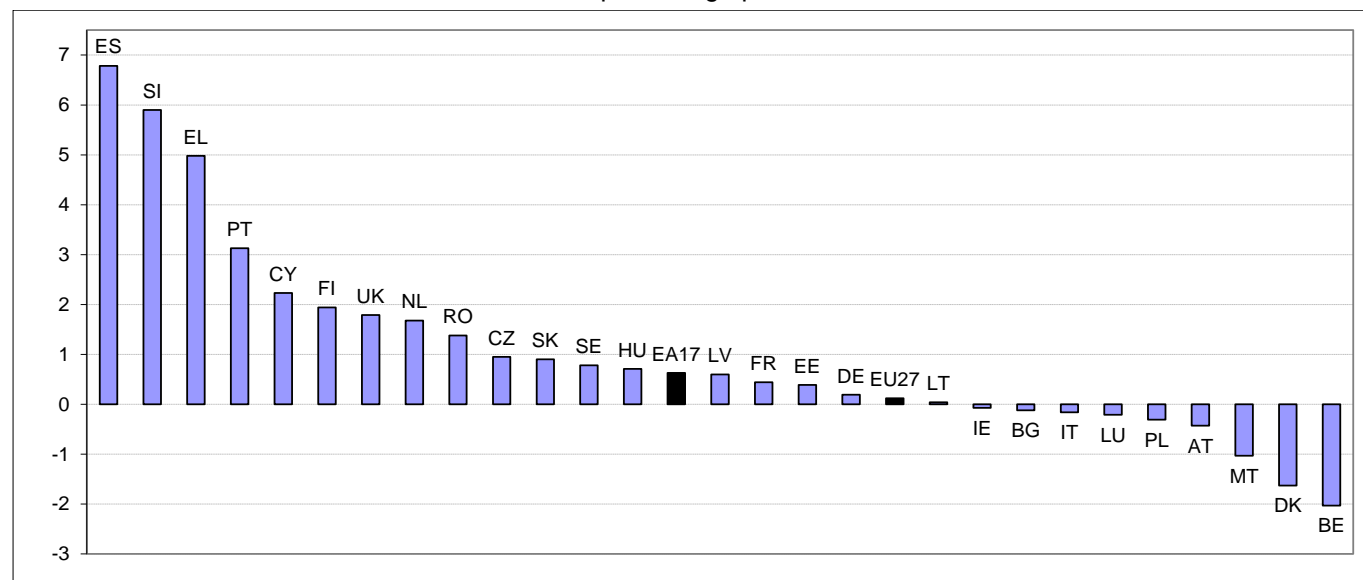

**Table 2: Quarterly government debt by Member State**

|                       |      | Quarterly government debt     |            |                       |         |                                                        |
|-----------------------|------|-------------------------------|------------|-----------------------|---------|--------------------------------------------------------|
|                       |      | Millions of national currency |            | % of GDP <sup>*</sup> |         | Difference in pp of GDP, Q4/2012 compared with Q3/2012 |
|                       |      | Q3/2012                       | Q4/2012    | Q3/2012               | Q4/2012 |                                                        |
| <b>Belgium</b>        | euro | 381 104                       | 375 389    | 101.6                 | 99.6    | -2.0                                                   |
| <b>Bulgaria</b>       | BGN  | 14 199                        | 14 390     | 18.7                  | 18.5    | -0.1                                                   |
| <b>Czech Republic</b> | CZK  | 1 726 155                     | 1 758 872  | 44.8                  | 45.8    | 0.9                                                    |
| <b>Denmark</b>        | DKK  | 859 357                       | 832 455    | 47.5                  | 45.8    | -1.6                                                   |
| <b>Germany</b>        | euro | 2 152 786                     | 2 166 278  | 81.7                  | 81.9    | 0.2                                                    |
| <b>Estonia</b>        | euro | 1 633                         | 1 724      | 9.8                   | 10.1    | 0.4                                                    |
| <b>Ireland</b>        | euro | 191 791                       | 192 461    | 117.7                 | 117.6   | -0.1                                                   |
| <b>Greece</b>         | euro | 300 144                       | 303 918    | 151.9                 | 156.9   | 5.0                                                    |
| <b>Spain</b>          | euro | 817 170                       | 883 873    | 77.4                  | 84.2    | 6.8                                                    |
| <b>France</b>         | euro | 1 817 965                     | 1 833 810  | 89.7                  | 90.2    | 0.4                                                    |
| <b>Italy</b>          | euro | 1 995 668                     | 1 988 658  | 127.2                 | 127.0   | -0.2                                                   |
| <b>Cyprus</b>         | euro | 15 043                        | 15 350     | 83.6                  | 85.8    | 2.2                                                    |
| <b>Latvia</b>         | LVL  | 6 085                         | 6 309      | 40.1                  | 40.7    | 0.6                                                    |
| <b>Lithuania</b>      | LTL  | 45 123                        | 46 037     | 40.7                  | 40.7    | 0.0                                                    |
| <b>Luxembourg</b>     | euro | 9 207                         | 9 232      | 21.0                  | 20.8    | -0.2                                                   |
| <b>Hungary</b>        | HUF  | 22 205 034                    | 22 380 937 | 78.4                  | 79.2    | 0.7                                                    |
| <b>Malta</b>          | euro | 4 900                         | 4 871      | 73.1                  | 72.1    | -1.0                                                   |
| <b>Netherlands</b>    | euro | 417 688                       | 427 515    | 69.5                  | 71.2    | 1.7                                                    |
| <b>Austria</b>        | euro | 226 778                       | 227 431    | 73.8                  | 73.4    | -0.4                                                   |
| <b>Poland</b>         | PLN  | 883 734                       | 886 779    | 55.9                  | 55.6    | -0.3                                                   |
| <b>Portugal</b>       | euro | 201 444                       | 204 485    | 120.5                 | 123.6   | 3.1                                                    |
| <b>Romania</b>        | RON  | 211 566                       | 222 212    | 36.4                  | 37.8    | 1.4                                                    |
| <b>Slovenia</b>       | euro | 17 217                        | 19 189     | 48.2                  | 54.1    | 5.9                                                    |
| <b>Slovakia</b>       | euro | 36 420                        | 37 245     | 51.2                  | 52.1    | 0.9                                                    |
| <b>Finland</b>        | euro | 99 084                        | 103 131    | 51.1                  | 53.0    | 1.9                                                    |
| <b>Sweden</b>         | SEK  | 1 324 620                     | 1 357 939  | 37.4                  | 38.2    | 0.8                                                    |
| <b>United Kingdom</b> | GBP  | 1 354 977                     | 1 387 436  | 88.2                  | 90.0    | 1.8                                                    |

\* Quarterly GDP figures for France and Spain have been benchmarked to their most up-to-date annual GDP figures by Eurostat.

Further data are available in the publication on quarterly government finance statistics:  
[http://epp.eurostat.ec.europa.eu/portal/page/portal/government\\_finance\\_statistics/data](http://epp.eurostat.ec.europa.eu/portal/page/portal/government_finance_statistics/data)
