# Supplementary material
Source: publisher figshare collection journal article supplement (https://tandf.figshare.com/articles/dataset/_/4793563)
Supplement: Supplementary file 19 [file 1]

149/2012 - 22 October 2012

## Provision of deficit and debt data for 2011 - second notification

# Euro area and EU27 government deficit at 4.1% and 4.4% of GDP respectively

### Government debt at 87.3% and 82.5%

In 2011, the government deficit<sup>1</sup> of both the **euro area**<sup>2</sup> (EA17) and the **EU27** decreased in absolute terms compared with 2010, while the government debt<sup>1</sup> rose in both zones. In the **euro area** the government deficit to GDP ratio decreased from 6.2% in 2010<sup>3</sup> to 4.1% in 2011, and in the **EU27** from 6.5% to 4.4%. In the **euro area** the government debt to GDP ratio increased from 85.4% at the end of 2010 to 87.3% at the end of 2011, and in the **EU27** from 80.0% to 82.5%.

|                                      |                | 2008       | 2009       | 2010       | 2011       |
|--------------------------------------|----------------|------------|------------|------------|------------|
| <b>Euro area (EA17)</b>              |                |            |            |            |            |
| GDP market prices (mp)               | (million euro) | 9 241 541  | 8 922 208  | 9 176 138  | 9 420 834  |
| Government deficit (-) / surplus (+) | (million euro) | -196 366   | -566 498   | -569 469   | -390 708   |
|                                      | (% of GDP)     | -2.1       | -6.3       | -6.2       | -4.1       |
| Government expenditure               | (% of GDP)     | 47.1       | 51.2       | 51.0       | 49.5       |
| Government revenue                   | (% of GDP)     | 45.0       | 44.9       | 44.8       | 45.4       |
| Government debt                      | (million euro) | 6 489 962  | 7 135 458  | 7 833 349  | 8 227 833  |
|                                      | (% of GDP)     | 70.2       | 80.0       | 85.4       | 87.3       |
| <b>EU27</b>                          |                |            |            |            |            |
| GDP mp                               | (million euro) | 12 472 988 | 11 754 729 | 12 278 824 | 12 650 044 |
| Government deficit (-) / surplus (+) | (million euro) | -303 470   | -806 992   | -800 906   | -560 834   |
|                                      | (% of GDP)     | -2.4       | -6.9       | -6.5       | -4.4       |
| Government expenditure               | (% of GDP)     | 47.1       | 51.1       | 50.6       | 49.1       |
| Government revenue                   | (% of GDP)     | 44.7       | 44.2       | 44.1       | 44.7       |
| Government debt                      | (million euro) | 7 763 975  | 8 764 582  | 9 826 981  | 10 433 926 |
|                                      | (% of GDP)     | 62.2       | 74.6       | 80.0       | 82.5       |

In 2011 the lowest government deficits relative to GDP were recorded in **Luxembourg** (-0.3%), **Finland** (-0.6%) and **Germany** (-0.8%), while **Hungary** (+4.3%), **Estonia** (+1.1%) and **Sweden** (+0.4%) registered surpluses. Seventeen Member States had deficits higher than 3% of GDP: **Ireland** (-13.4%), **Greece** and **Spain** (both -9.4%), the **United Kingdom** (-7.8%), **Slovenia** (-6.4%), **Cyprus** (-6.3%), **Lithuania** and **Romania** (both -5.5%), **France** (-5.2%), **Poland** (-5.0%), **Slovakia** (-4.9%), the **Netherlands** (-4.5%), **Portugal** (-4.4%), **Italy** (-3.9%), **Belgium** (-3.7%), **Latvia** (-3.4%) and the **Czech Republic** (-3.3%). In all, 25 Member States recorded an improvement in their government balance relative to GDP in 2011 compared with 2010 and two a worsening.

At the end of 2011, the lowest ratios of government debt to GDP were recorded in **Estonia** (6.1%), **Bulgaria** (16.3%), **Luxembourg** (18.3%), **Romania** (33.4%), **Sweden** (38.4%) and **Lithuania** (38.5%). Fourteen Member States had government debt ratios higher than 60% of GDP: **Greece** (170.6%), **Italy** (120.7%), **Portugal** (108.1%), **Ireland** (106.4%), **Belgium** (97.8%), **France** (86.0%), the **United Kingdom** (85.0%), **Hungary** (81.4%), **Germany** (80.5%), **Austria** (72.4%), **Cyprus** (71.1%), **Malta** (70.9%), **Spain** (69.3%) and the **Netherlands** (65.5%). In all, six Member States recorded an improvement in their government debt relative to GDP in 2011 compared with 2010 and 21 a worsening.

In 2011, government expenditure<sup>4</sup> in the **euro area** was equivalent to 49.5% of GDP and government revenue<sup>4</sup> to 45.4%. The figures for the **EU27** were 49.1% and 44.7% respectively. In both zones, the government expenditure ratio decreased between 2010 and 2011, while the government revenue ratio increased.

### Reservations on reported data<sup>5</sup>

**Ireland:** Eurostat is withdrawing a specific reservation, expressed in April 2012, on the data reported by Ireland, relating to the fact that restructuring plans of Allied Irish Banks and Irish Life & Permanent (in 2012 renamed as Permanent TSB) were not yet finalised. The Central Statistics Office of Ireland and Eurostat have examined updated restructuring plans sent to the EU Competition authorities. These plans form a suitable basis for partitioning the July 2011 injections in Allied Irish Banks and Permanent TSB into deficit-increasing and non-deficit increasing components. This has been implemented in revised data reported by Ireland.

**Ireland:** Eurostat is withdrawing a specific reservation, expressed in April 2012, on the data reported by Ireland, relating to the statistical classification of National Asset Management Agency Investment Limited (NAMA-IL). On the basis of documents provided by the Central Statistics Office of Ireland, NAMA-IL is majority privately-owned, following the sale by Irish Life of its stake in NAMA-IL to a private investor. This is a necessary condition for a special purpose entity to be classified outside the General Government sector, pursuant to Eurostat's decision of 15 July 2009 on public interventions during the financial crisis.

### Amendment by Eurostat to reported data<sup>6</sup>

**United Kingdom:** The UK Office for National Statistics has reclassified Bradford & Bingley and Northern Rock Asset Management to the General Government sector, in line with the financial defeasance chapter of the Manual on Government Deficit and Debt. Consequently, Eurostat is no longer amending the deficit and debt data reported by the United Kingdom with respect to public financial defeasance structures.

### Other issues

#### i. Intergovernmental lending

For the purpose of proper consolidation of general government debt in European aggregates and to provide users with information, Eurostat is collecting and publishing data on government loans to other EU governments, including those made through the European Financial Stability Facility (EFSF). For 2011 the intergovernmental lending figures relate mainly to lending to Greece, Ireland and Portugal.

#### ii. Supplementary tables for the financial crisis

Annex 2 contains supplementary tables for the financial crisis for the EU and the euro area. Eurostat publishes supplementary tables by Member State on its website:

[http://epp.eurostat.ec.europa.eu/portal/page/portal/government\\_finance\\_statistics/excessive\\_deficit/supplementary\\_tables\\_financial\\_turmoil](http://epp.eurostat.ec.europa.eu/portal/page/portal/government_finance_statistics/excessive_deficit/supplementary_tables_financial_turmoil)

These tables contain data on the "net revenue/cost for general government (impact on ESA95 government deficit)" and "outstanding amounts of assets, actual liabilities and contingent liabilities of government" in relation to government interventions in the context of the financial crisis for the years 2008 to 2011. See also the Eurostat decision on the statistical recording of public interventions to support financial institutions and financial markets during the financial crisis (Eurostat News Release 103/2009 of 15 July 2009).

A separate note is provided on the statistical treatment of government involvement in the banking crisis in 2011, see section 2 of the Eurostat summary note (October 2012) on supplementary tables for the financial crisis at:

[http://epp.eurostat.ec.europa.eu/portal/page/portal/government\\_finance\\_statistics/documents/Background\\_note\\_fin\\_crisis\\_Oct\\_2012\\_final.pdf](http://epp.eurostat.ec.europa.eu/portal/page/portal/government_finance_statistics/documents/Background_note_fin_crisis_Oct_2012_final.pdf)

#### iii. Stock of liabilities of trade credits and advances

Eurostat publishes for the first time on its website, as complementary information on government liabilities, data on trade credits and advances, as reported by Member States for the years 2008 to 2011:

[http://epp.eurostat.ec.europa.eu/portal/page/portal/government\\_finance\\_statistics/documents/Note\\_on\\_AF.71L-Oct\\_2012.pdf](http://epp.eurostat.ec.europa.eu/portal/page/portal/government_finance_statistics/documents/Note_on_AF.71L-Oct_2012.pdf)

It should be noted that, according to Regulation 479/2009, as amended, the liabilities in trade credits and advances of government units are not part of "Maastricht debt".

### Background

In this News Release, **Eurostat, the statistical office of the European Union**, is providing<sup>7</sup> government deficit and debt data based on figures reported in the **second 2012 notification** by EU Member States for the years 2008-2011, for the application of the excessive deficit procedure (EDP). This notification is based on the ESA95 system of national accounts. This News Release also includes data on government expenditure and revenue and an annex with the main revisions since the April 2012 News Release.

Eurostat will also be releasing information on the underlying government sector accounts, as well as on the contribution of deficit/surplus and other relevant factors to the variation in the debt level (stock-flow adjustment), on the government finance statistics section on its website:

[http://epp.eurostat.ec.europa.eu/portal/page/portal/government\\_finance\\_statistics/introduction](http://epp.eurostat.ec.europa.eu/portal/page/portal/government_finance_statistics/introduction)

1. According to the Protocol on the excessive deficit procedure annexed to the EC Treaty, government deficit (surplus) means the net borrowing (net lending) of the whole general government sector (central government, state government, local government and social security funds). It is calculated according to national accounts concepts (European System of Accounts, ESA95). Government debt is the consolidated gross debt of the whole general government sector outstanding at the end of the year (at nominal value).
  - Table of euro area and EU27 aggregates: the data are in euro. For those countries not belonging to the euro area, the rate of conversion into euro is as follows:
    - for deficit / surplus and GDP data, the annual average exchange rate;
    - for the stock of government debt, the end of year exchange rate.
  - Table of national data: these are in national currencies. For Slovakia and Estonia, data for the years prior to the adoption of the euro have been converted into euro according to the irrevocable conversion rate.
2. Euro area (EA17): Belgium, Germany, Estonia, Ireland, Greece, Spain, France, Italy, Cyprus, Luxembourg, Malta, Netherlands, Austria, Portugal, Slovenia, Slovakia and Finland. In the attached table, the euro area is defined as including Estonia and Slovakia for the full period, although Slovakia joined the euro area on 1 January 2009 and Estonia on 1 January 2011.
3. In the previous provision of data for the excessive deficit procedure, the 2011 government deficits for the EA17 and the EU27 were 4.1% and 4.5% of GDP respectively. The government debt of the EA17 was 87.2% of GDP and of the EU27 82.5% of GDP. See News Release 62/2012 of 23 April 2012.
4. Government expenditure and revenue are reported to Eurostat under the ESA95 transmission programme. They are the sum of non-financial transactions by general government, and include both current and capital transactions. For definitions, see Council Regulation 2223/96, as amended. It should be noted that the government balance (i.e. the difference between total government revenue and expenditure) is not exactly the same under ESA95 as that for the purpose of the excessive deficit procedure (see Council Regulation 2558/2001 on the reclassification of settlements under swaps agreements and forward rate agreements).
5. The term "reservations" is defined in article 15 (1) of Council Regulation 479/2009, as amended. The Commission (Eurostat) expresses reservations when it has doubts on the quality of the reported data.
6. According to Article 15 (2) of Council Regulation 479/2009, as amended, the Commission (Eurostat) may amend actual data reported by Member States and provide the amended data and a justification of the amendment where there is evidence that actual data reported by Member States do not comply with the quality requirements (compliance with accounting rules, completeness, reliability, timeliness and consistency of statistical data).
7. According to Article 14 (1) of Council Regulation 479/2009, as amended, Eurostat provides the actual government deficit and debt data for the application of the Protocol on the excessive deficit procedure, within three weeks after the reporting deadlines. This provision of data shall be effected through publication.

*For further information on the methodology of statistics reported under the excessive deficit procedure, please see Council Regulation 479/2009, as amended by Council Regulation 679/2010 (consolidated version available at <http://eur-lex.europa.eu/LexUriServ/LexUriServ.do?uri=CONSLEG:2009R0479:20100819:EN:PDF>), Council Regulation 2223/96, as amended (consolidated version available at <http://eur-lex.europa.eu/LexUriServ/site/en/consleg/1996/R/01996R2223-20030807-en.pdf>) and the Eurostat publication "ESA95 manual on government deficit and debt", fourth edition, 2012, [http://epp.eurostat.ec.europa.eu/portal/page/portal/product\\_details/publication?p\\_product\\_code=KS-RA-12-003](http://epp.eurostat.ec.europa.eu/portal/page/portal/product_details/publication?p_product_code=KS-RA-12-003)*

Issued by:  
**Eurostat Press Office**

**Tim ALLEN**  
**Tel: +352-4301-33 444**  
**[eurostat-pressoffice@ec.europa.eu](mailto:eurostat-pressoffice@ec.europa.eu)**

Eurostat news releases on the internet: <http://ec.europa.eu/eurostat>  
Selected Principal European Economic Indicators: <http://ec.europa.eu/eurostat/euroindicators>

**GDP, government deficit/surplus and debt in the EU (in national currencies)**

|                                                                           |                | 2008      | 2009      | 2010      | 2011      |
|---------------------------------------------------------------------------|----------------|-----------|-----------|-----------|-----------|
| <b>Belgium</b>                                                            |                |           |           |           |           |
| GDP mp                                                                    | (million euro) | 346 375   | 340 777   | 356 125   | 369 836   |
| Government deficit (-) / surplus (+)                                      | (million euro) | -3 490    | -18 871   | -13 389   | -13 771   |
|                                                                           | (% of GDP)     | -1.0      | -5.5      | -3.8      | -3.7      |
| Government expenditure                                                    | (% of GDP)     | 49.8      | 53.7      | 52.5      | 53.3      |
| Government revenue                                                        | (% of GDP)     | 48.7      | 48.1      | 48.6      | 49.4      |
| Government debt                                                           | (million euro) | 308 958   | 326 022   | 340 233   | 361 625   |
|                                                                           | (% of GDP)     | 89.2      | 95.7      | 95.5      | 97.8      |
| memo: intergovernmental lending<br>in the context of the financial crisis | (million euro) |           | 130       | 830       | 2 586     |
|                                                                           | (% of GDP)     |           | 0.0       | 0.2       | 0.7       |
| <b>Bulgaria</b>                                                           |                |           |           |           |           |
| GDP mp                                                                    | (million BGN)  | 69 295    | 68 322    | 70 511    | 75 265    |
| Government deficit (-) / surplus (+)                                      | (million BGN)  | 1 157     | -2 961    | -2 198    | -1 535    |
|                                                                           | (% of GDP)     | 1.7       | -4.3      | -3.1      | -2.0      |
| Government expenditure                                                    | (% of GDP)     | 38.4      | 41.4      | 37.4      | 35.6      |
| Government revenue                                                        | (% of GDP)     | 40.1      | 37.1      | 34.3      | 33.6      |
| Government debt                                                           | (million BGN)  | 9 481     | 9 992     | 11 453    | 12 290    |
|                                                                           | (% of GDP)     | 13.7      | 14.6      | 16.2      | 16.3      |
| memo: intergovernmental lending<br>in the context of the financial crisis | (million BGN)  |           | 0         | 0         | 0         |
|                                                                           | (% of GDP)     |           | 0.0       | 0.0       | 0.0       |
| <b>Czech Republic</b>                                                     |                |           |           |           |           |
| GDP mp                                                                    | (million CZK)  | 3 848 411 | 3 758 979 | 3 799 547 | 3 841 370 |
| Government deficit (-) / surplus (+)                                      | (million CZK)  | -85 947   | -218 331  | -182 711  | -125 177  |
|                                                                           | (% of GDP)     | -2.2      | -5.8      | -4.8      | -3.3      |
| Government expenditure                                                    | (% of GDP)     | 41.1      | 44.7      | 43.7      | 43.0      |
| Government revenue                                                        | (% of GDP)     | 38.9      | 38.9      | 39.0      | 39.8      |
| Government debt                                                           | (million CZK)  | 1 104 338 | 1 285 563 | 1 436 552 | 1 567 883 |
|                                                                           | (% of GDP)     | 28.7      | 34.2      | 37.8      | 40.8      |
| memo: intergovernmental lending<br>in the context of the financial crisis | (million CZK)  |           | 0         | 0         | 0         |
|                                                                           | (% of GDP)     |           | 0.0       | 0.0       | 0.0       |
| <b>Denmark</b>                                                            |                |           |           |           |           |
| GDP mp                                                                    | (million DKK)  | 1 753 152 | 1 667 839 | 1 754 648 | 1 782 515 |
| Government deficit (-) / surplus (+)                                      | (million DKK)  | 56 779    | -44 227   | -44 020   | -32 543   |
|                                                                           | (% of GDP)     | 3.2       | -2.7      | -2.5      | -1.8      |
| Government expenditure                                                    | (% of GDP)     | 51.5      | 58.0      | 57.8      | 58.0      |
| Government revenue                                                        | (% of GDP)     | 54.8      | 55.2      | 55.1      | 56.1      |
| Government debt                                                           | (million DKK)  | 585 137   | 677 175   | 752 820   | 831 147   |
|                                                                           | (% of GDP)     | 33.4      | 40.6      | 42.9      | 46.6      |
| memo: intergovernmental lending<br>in the context of the financial crisis | (million DKK)  |           | 0         | 0         | 0         |
|                                                                           | (% of GDP)     |           | 0.0       | 0.0       | 0.0       |
| <b>Germany</b>                                                            |                |           |           |           |           |
| GDP mp                                                                    | (million euro) | 2 473 800 | 2 374 500 | 2 496 200 | 2 592 600 |
| Government deficit (-) / surplus (+)                                      | (million euro) | -1 860    | -73 180   | -103 440  | -20 230   |
|                                                                           | (% of GDP)     | -0.1      | -3.1      | -4.1      | -0.8      |
| Government expenditure                                                    | (% of GDP)     | 44.1      | 48.2      | 47.7      | 45.3      |
| Government revenue                                                        | (% of GDP)     | 44.0      | 45.1      | 43.6      | 44.5      |
| Government debt                                                           | (million euro) | 1 652 261 | 1 768 585 | 2 058 955 | 2 087 998 |
|                                                                           | (% of GDP)     | 66.8      | 74.5      | 82.5      | 80.5      |
| memo: intergovernmental lending<br>in the context of the financial crisis | (million euro) |           | 784       | 6 049     | 19 994    |
|                                                                           | (% of GDP)     |           | 0.0       | 0.2       | 0.8       |

**GDP, government deficit/surplus and debt in the EU (in national currencies)**

|                                                                           |                | 2008      | 2009      | 2010      | 2011      |
|---------------------------------------------------------------------------|----------------|-----------|-----------|-----------|-----------|
| <b>Estonia</b>                                                            |                |           |           |           |           |
| GDP mp                                                                    | (million euro) | 16 235    | 13 762    | 14 323    | 15 951    |
| Government deficit (-) / surplus (+)                                      | (million euro) | -478      | -279      | 22        | 182       |
|                                                                           | (% of GDP)     | -2.9      | -2.0      | 0.2       | 1.1       |
| Government expenditure                                                    | (% of GDP)     | 39.7      | 45.5      | 40.7      | 38.3      |
| Government revenue                                                        | (% of GDP)     | 36.7      | 43.5      | 40.8      | 39.4      |
| Government debt                                                           | (million euro) | 737       | 991       | 957       | 975       |
|                                                                           | (% of GDP)     | 4.5       | 7.2       | 6.7       | 6.1       |
| memo: intergovernmental lending<br>in the context of the financial crisis | (million euro) |           | 0         | 0         | 14        |
|                                                                           | (% of GDP)     |           | 0.0       | 0.0       | 0.1       |
| <b>Ireland</b>                                                            |                |           |           |           |           |
| GDP mp                                                                    | (million euro) | 178 882   | 161 275   | 156 487   | 158 993   |
| Government deficit (-) / surplus (+)                                      | (million euro) | -13 160   | -22 484   | -48 297   | -21 256   |
|                                                                           | (% of GDP)     | -7.4      | -13.9     | -30.9     | -13.4     |
| Government expenditure                                                    | (% of GDP)     | 43.1      | 48.7      | 66.1      | 48.1      |
| Government revenue                                                        | (% of GDP)     | 35.7      | 34.7      | 35.2      | 34.9      |
| Government debt                                                           | (million euro) | 79 608    | 104 631   | 144 227   | 169 232   |
|                                                                           | (% of GDP)     | 44.5      | 64.9      | 92.2      | 106.4     |
| memo: intergovernmental lending<br>in the context of the financial crisis | (million euro) |           | 0         | 347       | 347       |
|                                                                           | (% of GDP)     |           | 0.0       | 0.2       | 0.2       |
| <b>Greece</b>                                                             |                |           |           |           |           |
| GDP mp                                                                    | (million euro) | 233 198   | 231 081   | 222 151   | 208 532   |
| Government deficit (-) / surplus (+)                                      | (million euro) | -22 880   | -36 125   | -23 732   | -19 686   |
|                                                                           | (% of GDP)     | -9.8      | -15.6     | -10.7     | -9.4      |
| Government expenditure                                                    | (% of GDP)     | 50.6      | 54.0      | 51.5      | 51.8      |
| Government revenue                                                        | (% of GDP)     | 40.7      | 38.3      | 40.6      | 42.3      |
| Government debt                                                           | (million euro) | 263 284   | 299 682   | 329 513   | 355 658   |
|                                                                           | (% of GDP)     | 112.9     | 129.7     | 148.3     | 170.6     |
| memo: intergovernmental lending<br>in the context of the financial crisis | (million euro) |           | 0         | 0         | 0         |
|                                                                           | (% of GDP)     |           | 0.0       | 0.0       | 0.0       |
| <b>Spain</b>                                                              |                |           |           |           |           |
| GDP mp                                                                    | (million euro) | 1 087 788 | 1 048 060 | 1 048 883 | 1 063 355 |
| Government deficit (-) / surplus (+)                                      | (million euro) | -48 897   | -117 143  | -101 438  | -100 402  |
|                                                                           | (% of GDP)     | -4.5      | -11.2     | -9.7      | -9.4      |
| Government expenditure                                                    | (% of GDP)     | 41.5      | 46.3      | 46.3      | 45.2      |
| Government revenue                                                        | (% of GDP)     | 37.0      | 35.1      | 36.6      | 35.7      |
| Government debt                                                           | (million euro) | 436 984   | 565 082   | 644 692   | 736 468   |
|                                                                           | (% of GDP)     | 40.2      | 53.9      | 61.5      | 69.3      |
| memo: intergovernmental lending<br>in the context of the financial crisis | (million euro) |           | 0         | 2 598     | 8 717     |
|                                                                           | (% of GDP)     |           | 0.0       | 0.2       | 0.8       |
| <b>France</b>                                                             |                |           |           |           |           |
| GDP mp                                                                    | (million euro) | 1 933 195 | 1 885 763 | 1 937 261 | 1 996 583 |
| Government deficit (-) / surplus (+)                                      | (million euro) | -64 299   | -142 223  | -136 966  | -103 324  |
|                                                                           | (% of GDP)     | -3.3      | -7.5      | -7.1      | -5.2      |
| Government expenditure                                                    | (% of GDP)     | 53.3      | 56.8      | 56.6      | 56.0      |
| Government revenue                                                        | (% of GDP)     | 49.9      | 49.2      | 49.5      | 50.8      |
| Government debt                                                           | (million euro) | 1 318 601 | 1 493 441 | 1 595 034 | 1 716 966 |
|                                                                           | (% of GDP)     | 68.2      | 79.2      | 82.3      | 86.0      |
| memo: intergovernmental lending<br>in the context of the financial crisis | (million euro) |           | 0         | 4 448     | 14 989    |
|                                                                           | (% of GDP)     |           | 0.0       | 0.2       | 0.8       |

## GDP, government deficit/surplus and debt in the EU (in national currencies)

|                                                                           |                | 2008      | 2009      | 2010      | 2011      |
|---------------------------------------------------------------------------|----------------|-----------|-----------|-----------|-----------|
| <b>Italy</b>                                                              |                |           |           |           |           |
| GDP mp                                                                    | (million euro) | 1 575 144 | 1 519 695 | 1 553 083 | 1 579 659 |
| Government deficit (-) / surplus (+)                                      | (million euro) | -42 700   | -82 752   | -69 270   | -61 758   |
|                                                                           | (% of GDP)     | -2.7      | -5.4      | -4.5      | -3.9      |
| Government expenditure                                                    | (% of GDP)     | 48.6      | 51.9      | 50.4      | 49.9      |
| Government revenue                                                        | (% of GDP)     | 45.9      | 46.5      | 46.0      | 46.1      |
| Government debt                                                           | (million euro) | 1 670 993 | 1 769 226 | 1 851 217 | 1 906 738 |
|                                                                           | (% of GDP)     | 106.1     | 116.4     | 119.2     | 120.7     |
| memo: intergovernmental lending<br>in the context of the financial crisis | (million euro) |           | 0         | 3 909     | 13 118    |
|                                                                           | (% of GDP)     |           | 0.0       | 0.3       | 0.8       |
| <b>Cyprus</b>                                                             |                |           |           |           |           |
| GDP mp                                                                    | (million euro) | 17 157    | 16 854    | 17 406    | 17 979    |
| Government deficit (-) / surplus (+)                                      | (million euro) | 161       | -1 031    | -920      | -1 132    |
|                                                                           | (% of GDP)     | 0.9       | -6.1      | -5.3      | -6.3      |
| Government expenditure                                                    | (% of GDP)     | 42.1      | 46.2      | 46.2      | 46.1      |
| Government revenue                                                        | (% of GDP)     | 43.1      | 40.1      | 40.9      | 39.8      |
| Government debt                                                           | (million euro) | 8 388     | 9 865     | 10 677    | 12 777    |
|                                                                           | (% of GDP)     | 48.9      | 58.5      | 61.3      | 71.1      |
| memo: intergovernmental lending<br>in the context of the financial crisis | (million euro) |           | 0         | 43        | 144       |
|                                                                           | (% of GDP)     |           | 0.0       | 0.2       | 0.8       |
| <b>Latvia</b>                                                             |                |           |           |           |           |
| GDP mp                                                                    | (million LVL)  | 16 085    | 13 070    | 12 784    | 14 275    |
| Government deficit (-) / surplus (+)                                      | (million LVL)  | -682      | -1 277    | -1 040    | -489      |
|                                                                           | (% of GDP)     | -4.2      | -9.8      | -8.1      | -3.4      |
| Government expenditure                                                    | (% of GDP)     | 39.1      | 44.4      | 43.7      | 38.4      |
| Government revenue                                                        | (% of GDP)     | 34.9      | 34.7      | 35.6      | 35.0      |
| Government debt                                                           | (million LVL)  | 3 182     | 4 803     | 5 695     | 6 028     |
|                                                                           | (% of GDP)     | 19.8      | 36.7      | 44.5      | 42.2      |
| memo: intergovernmental lending<br>in the context of the financial crisis | (million LVL)  |           | 0         | 0         | 0         |
|                                                                           | (% of GDP)     |           | 0.0       | 0.0       | 0.0       |
| <b>Lithuania</b>                                                          |                |           |           |           |           |
| GDP mp                                                                    | (million LTL)  | 111 920   | 92 032    | 95 323    | 106 370   |
| Government deficit (-) / surplus (+)                                      | (million LTL)  | -3 687    | -8 682    | -6 869    | -5 848    |
|                                                                           | (% of GDP)     | -3.3      | -9.4      | -7.2      | -5.5      |
| Government expenditure                                                    | (% of GDP)     | 37.2      | 43.7      | 40.8      | 37.4      |
| Government revenue                                                        | (% of GDP)     | 34.0      | 34.3      | 33.6      | 31.9      |
| Government debt                                                           | (million LTL)  | 17 375    | 26 983    | 36 127    | 40 962    |
|                                                                           | (% of GDP)     | 15.5      | 29.3      | 37.9      | 38.5      |
| memo: intergovernmental lending<br>in the context of the financial crisis | (million LTL)  |           | 0         | 0         | 0         |
|                                                                           | (% of GDP)     |           | 0.0       | 0.0       | 0.0       |
| <b>Luxembourg</b>                                                         |                |           |           |           |           |
| GDP mp                                                                    | (million euro) | 37 372    | 36 027    | 39 906    | 42 604    |
| Government deficit (-) / surplus (+)                                      | (million euro) | 1 192     | -277      | -331      | -140      |
|                                                                           | (% of GDP)     | 3.2       | -0.8      | -0.8      | -0.3      |
| Government expenditure                                                    | (% of GDP)     | 39.1      | 44.6      | 42.8      | 42.0      |
| Government revenue                                                        | (% of GDP)     | 42.3      | 43.9      | 42.0      | 41.6      |
| Government debt                                                           | (million euro) | 5 395     | 5 527     | 7 673     | 7 804     |
|                                                                           | (% of GDP)     | 14.4      | 15.3      | 19.2      | 18.3      |
| memo: intergovernmental lending<br>in the context of the financial crisis | (million euro) |           | 0         | 55        | 183       |
|                                                                           | (% of GDP)     |           | 0.0       | 0.1       | 0.4       |

## GDP, government deficit/surplus and debt in the EU (in national currencies)

|                                                                           |                | 2008       | 2009       | 2010       | 2011       |
|---------------------------------------------------------------------------|----------------|------------|------------|------------|------------|
| <b>Hungary</b>                                                            |                |            |            |            |            |
| GDP mp                                                                    | (million HUF)  | 26 543 305 | 25 626 480 | 26 607 339 | 27 886 401 |
| Government deficit (-) / surplus (+)                                      | (million HUF)  | -990 440   | -1 182 207 | -1 164 350 | 1 211 680  |
|                                                                           | (% of GDP)     | -3.7       | -4.6       | -4.4       | 4.3        |
| Government expenditure                                                    | (% of GDP)     | 49.2       | 51.4       | 49.8       | 49.6       |
| Government revenue                                                        | (% of GDP)     | 45.5       | 46.9       | 45.4       | 53.9       |
| Government debt                                                           | (million HUF)  | 19 370 391 | 20 448 176 | 21 775 209 | 22 689 825 |
|                                                                           | (% of GDP)     | 73.0       | 79.8       | 81.8       | 81.4       |
| memo: intergovernmental lending<br>in the context of the financial crisis | (million HUF)  |            | 0          | 0          | 0          |
|                                                                           | (% of GDP)     |            | 0.0        | 0.0        | 0.0        |
| <b>Malta</b>                                                              |                |            |            |            |            |
| GDP mp                                                                    | (million euro) | 5 859      | 5 857      | 6 235      | 6 499      |
| Government deficit (-) / surplus (+)                                      | (million euro) | -268       | -226       | -225       | -177       |
|                                                                           | (% of GDP)     | -4.6       | -3.9       | -3.6       | -2.7       |
| Government expenditure                                                    | (% of GDP)     | 43.8       | 43.3       | 42.5       | 42.3       |
| Government revenue                                                        | (% of GDP)     | 39.2       | 39.4       | 38.9       | 39.6       |
| Government debt                                                           | (million euro) | 3 632      | 3 963      | 4 258      | 4 607      |
|                                                                           | (% of GDP)     | 62.0       | 67.6       | 68.3       | 70.9       |
| memo: intergovernmental lending<br>in the context of the financial crisis | (million euro) |            | 0          | 20         | 66         |
|                                                                           | (% of GDP)     |            | 0.0        | 0.3        | 1.0        |
| <b>Netherlands</b>                                                        |                |            |            |            |            |
| GDP mp                                                                    | (million euro) | 594 481    | 573 235    | 588 740    | 601 973    |
| Government deficit (-) / surplus (+)                                      | (million euro) | 3 073      | -32 074    | -30 118    | -27 009    |
|                                                                           | (% of GDP)     | 0.5        | -5.6       | -5.1       | -4.5       |
| Government expenditure                                                    | (% of GDP)     | 46.2       | 51.4       | 51.2       | 49.8       |
| Government revenue                                                        | (% of GDP)     | 46.7       | 45.8       | 46.1       | 45.4       |
| Government debt                                                           | (million euro) | 347 525    | 348 284    | 371 784    | 394 197    |
|                                                                           | (% of GDP)     | 58.5       | 60.8       | 63.1       | 65.5       |
| memo: intergovernmental lending<br>in the context of the financial crisis | (million euro) |            | 0          | 1 247      | 4 187      |
|                                                                           | (% of GDP)     |            | 0.0        | 0.2        | 0.7        |
| <b>Austria</b>                                                            |                |            |            |            |            |
| GDP mp                                                                    | (million euro) | 282 744    | 276 151    | 286 397    | 300 712    |
| Government deficit (-) / surplus (+)                                      | (million euro) | -2 635     | -11 330    | -12 866    | -7 591     |
|                                                                           | (% of GDP)     | -0.9       | -4.1       | -4.5       | -2.5       |
| Government expenditure                                                    | (% of GDP)     | 49.3       | 52.6       | 52.6       | 50.5       |
| Government revenue                                                        | (% of GDP)     | 48.3       | 48.5       | 48.1       | 48.0       |
| Government debt                                                           | (million euro) | 180 475    | 191 069    | 206 087    | 217 782    |
|                                                                           | (% of GDP)     | 63.8       | 69.2       | 72.0       | 72.4       |
| memo: intergovernmental lending<br>in the context of the financial crisis | (million euro) |            | 0          | 607        | 2 038      |
|                                                                           | (% of GDP)     |            | 0.0        | 0.2        | 0.7        |
| <b>Poland</b>                                                             |                |            |            |            |            |
| GDP mp                                                                    | (million PLN)  | 1 275 508  | 1 344 505  | 1 416 585  | 1 523 245  |
| Government deficit (-) / surplus (+)                                      | (million PLN)  | -46 950    | -99 596    | -111 291   | -76 680    |
|                                                                           | (% of GDP)     | -3.7       | -7.4       | -7.9       | -5.0       |
| Government expenditure                                                    | (% of GDP)     | 43.2       | 44.6       | 45.4       | 43.6       |
| Government revenue                                                        | (% of GDP)     | 39.5       | 37.2       | 37.6       | 38.5       |
| Government debt                                                           | (million PLN)  | 600 845    | 684 082    | 776 825    | 859 076    |
|                                                                           | (% of GDP)     | 47.1       | 50.9       | 54.8       | 56.4       |
| memo: intergovernmental lending<br>in the context of the financial crisis | (million PLN)  |            | 0          | 0          | 0          |
|                                                                           | (% of GDP)     |            | 0.0        | 0.0        | 0.0        |

**GDP, government deficit/surplus and debt in the EU (in national currencies)**

|                                                                           |                | 2008    | 2009    | 2010    | 2011    |
|---------------------------------------------------------------------------|----------------|---------|---------|---------|---------|
| <b>Portugal</b>                                                           |                |         |         |         |         |
| GDP mp                                                                    | (million euro) | 171 983 | 168 504 | 172 670 | 170 909 |
| Government deficit (-) / surplus (+)                                      | (million euro) | -6 236  | -17 103 | -16 950 | -7 525  |
|                                                                           | (% of GDP)     | -3.6    | -10.2   | -9.8    | -4.4    |
| Government expenditure                                                    | (% of GDP)     | 44.8    | 49.8    | 51.3    | 49.4    |
| Government revenue                                                        | (% of GDP)     | 41.1    | 39.6    | 41.4    | 45.0    |
| Government debt                                                           | (million euro) | 123 302 | 140 226 | 161 530 | 184 699 |
|                                                                           | (% of GDP)     | 71.7    | 83.2    | 93.5    | 108.1   |
| memo: intergovernmental lending<br>in the context of the financial crisis | (million euro) |         | 0       | 548     | 1 212   |
|                                                                           | (% of GDP)     |         | 0.0     | 0.3     | 0.7     |
| <b>Romania</b>                                                            |                |         |         |         |         |
| GDP mp                                                                    | (million RON)  | 514 700 | 501 139 | 523 790 | 578 552 |
| Government deficit (-) / surplus (+)                                      | (million RON)  | -29 242 | -45 146 | -35 747 | -31 979 |
|                                                                           | (% of GDP)     | -5.7    | -9.0    | -6.8    | -5.5    |
| Government expenditure                                                    | (% of GDP)     | 39.3    | 41.1    | 40.1    | 37.9    |
| Government revenue                                                        | (% of GDP)     | 33.6    | 32.1    | 33.3    | 32.3    |
| Government debt                                                           | (million RON)  | 69 020  | 118 428 | 159 511 | 193 144 |
|                                                                           | (% of GDP)     | 13.4    | 23.6    | 30.5    | 33.4    |
| memo: intergovernmental lending<br>in the context of the financial crisis | (million RON)  |         | 0       | 0       | 0       |
|                                                                           | (% of GDP)     |         | 0.0     | 0.0     | 0.0     |
| <b>Slovenia</b>                                                           |                |         |         |         |         |
| GDP mp                                                                    | (million euro) | 37 244  | 35 556  | 35 607  | 36 172  |
| Government deficit (-) / surplus (+)                                      | (million euro) | -702    | -2 127  | -2 046  | -2 307  |
|                                                                           | (% of GDP)     | -1.9    | -6.0    | -5.7    | -6.4    |
| Government expenditure                                                    | (% of GDP)     | 44.3    | 49.1    | 50.3    | 50.7    |
| Government revenue                                                        | (% of GDP)     | 42.4    | 43.1    | 44.5    | 44.3    |
| Government debt                                                           | (million euro) | 8 180   | 12 449  | 13 737  | 16 954  |
|                                                                           | (% of GDP)     | 22.0    | 35.0    | 38.6    | 46.9    |
| memo: intergovernmental lending<br>in the context of the financial crisis | (million euro) |         | 0       | 103     | 325     |
|                                                                           | (% of GDP)     |         | 0.0     | 0.3     | 0.9     |
| <b>Slovakia</b>                                                           |                |         |         |         |         |
| GDP mp                                                                    | (million euro) | 66 842  | 62 794  | 65 869  | 69 108  |
| Government deficit (-) / surplus (+)                                      | (million euro) | -1 397  | -5 022  | -5 047  | -3 414  |
|                                                                           | (% of GDP)     | -2.1    | -8.0    | -7.7    | -4.9    |
| Government expenditure                                                    | (% of GDP)     | 34.9    | 41.5    | 40.0    | 38.2    |
| Government revenue                                                        | (% of GDP)     | 32.8    | 33.5    | 32.3    | 33.2    |
| Government debt                                                           | (million euro) | 18 624  | 22 331  | 26 998  | 29 911  |
|                                                                           | (% of GDP)     | 27.9    | 35.6    | 41.0    | 43.3    |
| memo: intergovernmental lending<br>in the context of the financial crisis | (million euro) |         | 0       | 0       | 173     |
|                                                                           | (% of GDP)     |         | 0.0     | 0.0     | 0.2     |
| <b>Finland</b>                                                            |                |         |         |         |         |
| GDP mp                                                                    | (million euro) | 185 670 | 172 318 | 178 796 | 189 368 |
| Government deficit (-) / surplus (+)                                      | (million euro) | 8 160   | -4 250  | -4 455  | -1 167  |
|                                                                           | (% of GDP)     | 4.4     | -2.5    | -2.5    | -0.6    |
| Government expenditure                                                    | (% of GDP)     | 49.2    | 56.1    | 55.8    | 54.8    |
| Government revenue                                                        | (% of GDP)     | 53.6    | 53.4    | 53.0    | 53.9    |
| Government debt                                                           | (million euro) | 63 015  | 74 997  | 86 974  | 92 849  |
|                                                                           | (% of GDP)     | 33.9    | 43.5    | 48.6    | 49.0    |
| memo: intergovernmental lending<br>in the context of the financial crisis | (million euro) |         | 0       | 392     | 1 316   |
|                                                                           | (% of GDP)     |         | 0.0     | 0.2     | 0.7     |



## GDP, government deficit/surplus and debt in the EU (in national currencies)

|                                                                                   |                      | 2008             | 2009             | 2010             | 2011             |
|-----------------------------------------------------------------------------------|----------------------|------------------|------------------|------------------|------------------|
| <b>Sweden</b>                                                                     |                      |                  |                  |                  |                  |
| GDP mp                                                                            | (million SEK)        | 3 204 320        | 3 105 790        | 3 337 531        | 3 502 534        |
| Government deficit (-) / surplus (+)                                              | (million SEK)        | 69 454           | -22 216          | 9 439            | 12 412           |
|                                                                                   | (% of GDP)           | 2.2              | -0.7             | 0.3              | 0.4              |
| Government expenditure                                                            | (% of GDP)           | 51.7             | 54.9             | 52.3             | 51.1             |
| Government revenue                                                                | (% of GDP)           | 53.9             | 54.0             | 52.3             | 51.3             |
| Government debt                                                                   | (million SEK)        | 1 243 295        | 1 322 285        | 1 316 724        | 1 345 560        |
|                                                                                   | (% of GDP)           | 38.8             | 42.6             | 39.5             | 38.4             |
| memo: intergovernmental lending<br>in the context of the financial crisis         | (million SEK)        |                  | 0                | 0                | 0                |
|                                                                                   | (% of GDP)           |                  | 0.0              | 0.0              | 0.0              |
| <b>United Kingdom*</b>                                                            |                      |                  |                  |                  |                  |
| GDP mp                                                                            | (million GBP)        | 1 440 931        | 1 401 863        | 1 466 569        | 1 519 134        |
| Government deficit (-) / surplus (+)                                              | (million GBP)        | -73 101          | -160 803         | -149 381         | -118 949         |
|                                                                                   | (% of GDP)           | -5.1             | -11.5            | -10.2            | -7.8             |
| Government expenditure                                                            | (% of GDP)           | 47.7             | 51.3             | 50.4             | 48.5             |
| Government revenue                                                                | (% of GDP)           | 42.6             | 39.9             | 40.2             | 40.7             |
| Government debt                                                                   | (million GBP)        | 753 605          | 950 849          | 1 164 508        | 1 291 974        |
|                                                                                   | (% of GDP)           | 52.3             | 67.8             | 79.4             | 85.0             |
| memo: intergovernmental lending<br>in the context of the financial crisis         | (million GBP)        |                  | 0                | 0                | 403              |
|                                                                                   | (% of GDP)           |                  | 0.0              | 0.0              | 0.0              |
| <i>Financial year (fy)</i>                                                        |                      | <b>2008/2009</b> | <b>2009/2010</b> | <b>2010/2011</b> | <b>2011/2012</b> |
| <i>GDP mp</i>                                                                     | <i>(million GBP)</i> | <i>1 424 818</i> | <i>1 415 137</i> | <i>1 482 466</i> | <i>1 524 871</i> |
| <i>Government deficit (-) / surplus (+)</i>                                       | <i>(million GBP)</i> | <i>-100 063</i>  | <i>-163 006</i>  | <i>-141 726</i>  | <i>-117 473</i>  |
|                                                                                   | <i>(% of GDP)</i>    | <i>-7.0</i>      | <i>-11.5</i>     | <i>-9.6</i>      | <i>-7.7</i>      |
| <i>Government debt</i>                                                            | <i>(million GBP)</i> | <i>799 926</i>   | <i>1 049 033</i> | <i>1 182 617</i> | <i>1 312 137</i> |
|                                                                                   | <i>(% of GDP)</i>    | <i>56.1</i>      | <i>74.1</i>      | <i>79.8</i>      | <i>86.0</i>      |
| <i>memo: intergovernmental lending<br/>in the context of the financial crisis</i> | <i>(million GBP)</i> |                  | <i>0</i>         | <i>0</i>         | <i>403</i>       |
|                                                                                   | <i>(% of GDP)</i>    |                  | <i>0.0</i>       | <i>0.0</i>       | <i>0.0</i>       |

\* Data refer to calendar years. Data referring to the financial year (1 April to 31 March), are shown in italics. For the United Kingdom, the relevant data for implementation of the excessive deficit procedure are financial year data.

## Annex 1

### Main revisions between the April 2012 and the October 2012 notifications

Below are shown country specific explanations for the largest revisions in deficit and debt for 2008-2011 between the April 2012 and the October 2012 notifications, as well as in GDP.

Since the April 2012 notification, there have been revisions of the 2011 government deficit of about -0.9% of GDP in one Member State, of -0.3% in three Member States, of between -0.2% and +0.3% in twenty two Member States and of +0.4% in one Member State.

#### Deficit

**Germany:** The decrease in the deficit for 2011 is mainly due to source data updates for the compilation of revenue and expenditure for state and local government.

**Ireland:** The decrease in the deficit for 2010 is mainly due to source data updates for central government and correction of residuals and accrual adjustments for the Health Service Executive. The increase in the deficit for 2011 is mainly due to a revised capital transfer element of injections into Allied Irish Banks and Permanent TSB.

**Spain:** The increase in the deficit for 2010 is mainly due to the previously unrecorded unpaid bills in the state and local government sub-sectors. The increase in the deficit for 2011 is mainly due to the re-classification of capital injections by central government into Catalunya Caixa Bank, NCG Bank and Unnim Bank and to the previously unrecorded unpaid bills in the state and local government sub-sectors.

**Luxembourg:** The decrease in the deficit for 2011 is mainly due to the improved accounting results of the Special Funds and an increase in the reported surplus of social security funds.

**Netherlands:** The decrease in the deficit for 2011 is mainly due to source data updates on social transfers in kind and gross fixed capital formation.

**Romania:** The increase in the deficit for 2011 is mainly due to source data updates for some central government bodies and to the recording of tax revenue in the state budget in the framework of restructuring schemes for public companies with accumulated arrears.

**Slovenia:** The decrease in the deficit for 2010 is mainly due to methodological changes to accrual adjustments for taxes and time of recording for gross fixed capital formation.

**United Kingdom:** The decrease in the deficit for the year 2011 is mainly due to source data updates for both central and local government and to a change in tax accrual methodology.

#### Debt

**Italy:** The increase in the debt for the whole period is mainly due to the implementation of the Eurostat decision of 31 July 2012 on the recording of trade credits.

**United Kingdom:** The decrease in the debt for the years 2008 and 2009 is mainly due to a change in the calculation of the relevant impact of public financial defeasance structures.

#### GDP

The GDP for 2011 notified in October 2012 for EDP purposes was revised by small amounts by a number of Member States compared to that notified in April 2012. A decrease of more than 3% of GDP has been notified for Greece and a decrease of about 1% for Finland. An increase of between 1% and 2% of GDP has been notified for Ireland, Cyprus, Malta and Slovenia. For 2010, a decrease of more than 2% of GDP has been notified for Greece and an increase of between 1% and 2% for Malta. A decrease of about 4% of GDP for 2009 and of between 5% and 6% for 2008 has been notified for Luxembourg.

**Revisions in government deficit/surplus and government debt ratios**  
from the April 2012 to the October 2012 notification

|                       |                                                    | Deficit/surplus* |            |             |             | Debt        |             |             |             |
|-----------------------|----------------------------------------------------|------------------|------------|-------------|-------------|-------------|-------------|-------------|-------------|
|                       |                                                    | 2008             | 2009       | 2010        | 2011        | 2008        | 2009        | 2010        | 2011        |
| <b>Belgium</b>        | <b>Revision in deficit/surplus and debt ratios</b> | <b>0.0</b>       | <b>0.0</b> | <b>0.0</b>  | <b>0.0</b>  | <b>-0.1</b> | <b>-0.2</b> | <b>-0.5</b> | <b>-0.3</b> |
|                       | - due to revision of deficit/surplus or debt       | 0.0              | 0.0        | 0.0         | 0.0         | -0.1        | 0.0         | 0.0         | 0.0         |
|                       | - due to revision of GDP                           | 0.0              | 0.0        | 0.0         | 0.0         | -0.1        | -0.1        | -0.5        | -0.2        |
| <b>Bulgaria</b>       | <b>Revision in deficit/surplus and debt ratios</b> | <b>0.0</b>       | <b>0.0</b> | <b>0.0</b>  | <b>0.1</b>  | <b>0.0</b>  | <b>0.0</b>  | <b>0.0</b>  | <b>0.0</b>  |
|                       | - due to revision of deficit/surplus or debt       | 0.0              | 0.0        | 0.0         | 0.1         | 0.0         | 0.0         | 0.0         | 0.0         |
|                       | - due to revision of GDP                           | 0.0              | 0.0        | 0.0         | 0.0         | 0.0         | 0.0         | 0.0         | 0.0         |
| <b>Czech Republic</b> | <b>Revision in deficit/surplus and debt ratios</b> | <b>0.0</b>       | <b>0.0</b> | <b>0.0</b>  | <b>-0.2</b> | <b>0.0</b>  | <b>-0.2</b> | <b>-0.2</b> | <b>-0.3</b> |
|                       | - due to revision of deficit/surplus or debt       | 0.0              | 0.0        | 0.0         | -0.2        | 0.0         | 0.0         | 0.0         | 0.0         |
|                       | - due to revision of GDP                           | 0.0              | 0.0        | 0.0         | 0.0         | 0.0         | -0.2        | -0.2        | -0.3        |
| <b>Denmark</b>        | <b>Revision in deficit/surplus and debt ratios</b> | <b>0.0</b>       | <b>0.0</b> | <b>0.0</b>  | <b>0.0</b>  | <b>0.0</b>  | <b>0.0</b>  | <b>0.0</b>  | <b>0.1</b>  |
|                       | - due to revision of deficit/surplus or debt       | 0.0              | 0.0        | 0.0         | 0.0         | 0.0         | 0.0         | 0.0         | 0.0         |
|                       | - due to revision of GDP                           | 0.0              | 0.0        | 0.0         | 0.0         | 0.0         | 0.0         | 0.0         | 0.1         |
| <b>Germany</b>        | <b>Revision in deficit/surplus and debt ratios</b> | <b>0.0</b>       | <b>0.1</b> | <b>0.1</b>  | <b>0.2</b>  | <b>0.1</b>  | <b>0.1</b>  | <b>-0.6</b> | <b>-0.7</b> |
|                       | - due to revision of deficit/surplus or debt       | 0.0              | 0.1        | 0.1         | 0.2         | 0.1         | 0.1         | 0.1         | 0.0         |
|                       | - due to revision of GDP                           | 0.0              | 0.0        | 0.0         | 0.0         | 0.0         | 0.0         | -0.6        | -0.7        |
| <b>Estonia</b>        | <b>Revision in deficit/surplus and debt ratios</b> | <b>0.0</b>       | <b>0.0</b> | <b>-0.1</b> | <b>0.1</b>  | <b>0.0</b>  | <b>0.0</b>  | <b>0.0</b>  | <b>0.1</b>  |
|                       | - due to revision of deficit/surplus or debt       | 0.0              | 0.0        | -0.1        | 0.1         | 0.0         | 0.0         | 0.0         | 0.1         |
|                       | - due to revision of GDP                           | 0.0              | 0.0        | 0.0         | 0.0         | 0.0         | 0.0         | 0.0         | 0.0         |
| <b>Ireland</b>        | <b>Revision in deficit/surplus and debt ratios</b> | <b>0.0</b>       | <b>0.1</b> | <b>0.3</b>  | <b>-0.3</b> | <b>0.3</b>  | <b>-0.3</b> | <b>-0.3</b> | <b>-1.8</b> |
|                       | - due to revision of deficit/surplus or debt       | 0.0              | 0.0        | 0.2         | -0.5        | 0.0         | 0.0         | 0.0         | 0.0         |
|                       | - due to revision of GDP                           | 0.0              | 0.1        | 0.1         | 0.2         | 0.3         | -0.3        | -0.3        | -1.7        |
| <b>Greece</b>         | <b>Revision in deficit/surplus and debt ratios</b> | <b>0.0</b>       | <b>0.0</b> | <b>-0.3</b> | <b>-0.3</b> | <b>-0.1</b> | <b>0.3</b>  | <b>3.4</b>  | <b>5.2</b>  |
|                       | - due to revision of deficit/surplus or debt       | 0.0              | 0.0        | -0.1        | -0.1        | 0.0         | 0.0         | 0.0         | 0.0         |
|                       | - due to revision of GDP                           | 0.0              | 0.0        | -0.2        | -0.3        | -0.1        | 0.3         | 3.4         | 5.2         |
| <b>Spain</b>          | <b>Revision in deficit/surplus and debt ratios</b> | <b>0.0</b>       | <b>0.0</b> | <b>-0.3</b> | <b>-0.9</b> | <b>0.0</b>  | <b>0.0</b>  | <b>0.3</b>  | <b>0.8</b>  |
|                       | - due to revision of deficit/surplus or debt       | 0.0              | 0.0        | -0.3        | -0.9        | 0.0         | 0.0         | 0.1         | 0.1         |
|                       | - due to revision of GDP                           | 0.0              | 0.0        | 0.0         | -0.1        | 0.0         | 0.0         | 0.1         | 0.6         |
| <b>France</b>         | <b>Revision in deficit/surplus and debt ratios</b> | <b>0.0</b>       | <b>0.0</b> | <b>0.0</b>  | <b>0.0</b>  | <b>0.0</b>  | <b>0.0</b>  | <b>0.0</b>  | <b>0.2</b>  |
|                       | - due to revision of deficit/surplus or debt       | 0.0              | 0.0        | 0.0         | 0.0         | 0.0         | 0.0         | 0.0         | 0.0         |
|                       | - due to revision of GDP                           | 0.0              | 0.0        | 0.0         | 0.0         | 0.0         | 0.0         | 0.0         | 0.2         |
| <b>Italy</b>          | <b>Revision in deficit/surplus and debt ratios</b> | <b>0.0</b>       | <b>0.0</b> | <b>0.1</b>  | <b>0.0</b>  | <b>0.3</b>  | <b>0.4</b>  | <b>0.6</b>  | <b>0.6</b>  |
|                       | - due to revision of deficit/surplus or debt       | 0.0              | 0.0        | 0.1         | 0.0         | 0.3         | 0.4         | 0.6         | 0.6         |
|                       | - due to revision of GDP                           | 0.0              | 0.0        | 0.0         | 0.0         | 0.0         | 0.0         | 0.0         | 0.0         |
| <b>Cyprus</b>         | <b>Revision in deficit/surplus and debt ratios</b> | <b>0.0</b>       | <b>0.0</b> | <b>0.0</b>  | <b>0.0</b>  | <b>0.0</b>  | <b>0.0</b>  | <b>-0.1</b> | <b>-0.5</b> |
|                       | - due to revision of deficit/surplus or debt       | 0.0              | 0.0        | 0.0         | -0.1        | 0.0         | 0.0         | 0.1         | 0.3         |
|                       | - due to revision of GDP                           | 0.0              | 0.0        | 0.0         | 0.1         | 0.0         | 0.0         | -0.3        | -0.9        |
| <b>Latvia</b>         | <b>Revision in deficit/surplus and debt ratios</b> | <b>0.0</b>       | <b>0.0</b> | <b>0.0</b>  | <b>0.1</b>  | <b>0.0</b>  | <b>0.0</b>  | <b>-0.2</b> | <b>-0.3</b> |
|                       | - due to revision of deficit/surplus or debt       | 0.0              | 0.0        | 0.0         | 0.0         | 0.0         | 0.0         | 0.0         | 0.0         |
|                       | - due to revision of GDP                           | 0.0              | 0.0        | 0.0         | 0.0         | 0.0         | 0.0         | -0.2        | -0.3        |
| <b>Lithuania</b>      | <b>Revision in deficit/surplus and debt ratios</b> | <b>0.0</b>       | <b>0.0</b> | <b>0.0</b>  | <b>0.0</b>  | <b>0.0</b>  | <b>0.0</b>  | <b>-0.1</b> | <b>0.0</b>  |
|                       | - due to revision of deficit/surplus or debt       | 0.0              | 0.0        | 0.0         | 0.0         | 0.0         | 0.0         | 0.0         | 0.1         |
|                       | - due to revision of GDP                           | 0.0              | 0.0        | 0.0         | 0.0         | 0.0         | 0.0         | -0.1        | -0.1        |
| <b>Luxembourg</b>     | <b>Revision in deficit/surplus and debt ratios</b> | <b>0.2</b>       | <b>0.0</b> | <b>0.0</b>  | <b>0.3</b>  | <b>0.8</b>  | <b>0.6</b>  | <b>0.2</b>  | <b>0.1</b>  |
|                       | - due to revision of deficit/surplus or debt       | 0.0              | 0.1        | 0.0         | 0.3         | 0.0         | 0.0         | 0.0         | 0.0         |
|                       | - due to revision of GDP                           | 0.2              | 0.0        | 0.0         | 0.0         | 0.8         | 0.6         | 0.2         | 0.1         |

\* Revisions to deficit/surplus ratios: a positive sign means an improved government balance relative to GDP, and a negative sign a worsening.

**Revisions in government deficit/surplus and government debt ratios**  
from the April 2012 to the October 2012 notification

|                |                                                    | Deficit/surplus* |             |             |             | Debt        |             |             |             |
|----------------|----------------------------------------------------|------------------|-------------|-------------|-------------|-------------|-------------|-------------|-------------|
|                |                                                    | 2008             | 2009        | 2010        | 2011        | 2008        | 2009        | 2010        | 2011        |
| Hungary        | <b>Revision in deficit/surplus and debt ratios</b> | <b>0.0</b>       | <b>0.0</b>  | <b>-0.2</b> | <b>0.1</b>  | <b>0.0</b>  | <b>0.0</b>  | <b>0.4</b>  | <b>0.8</b>  |
|                | - due to revision of deficit/surplus or debt       | 0.0              | 0.0         | -0.1        | 0.0         | 0.0         | 0.0         | 0.0         | 0.0         |
|                | - due to revision of GDP                           | 0.0              | 0.0         | 0.0         | 0.0         | 0.0         | 0.0         | 0.4         | 0.8         |
| Malta          | <b>Revision in deficit/surplus and debt ratios</b> | <b>0.0</b>       | <b>-0.1</b> | <b>0.1</b>  | <b>0.0</b>  | <b>-0.3</b> | <b>-0.4</b> | <b>-1.1</b> | <b>-1.1</b> |
|                | - due to revision of deficit/surplus or debt       | 0.0              | -0.1        | 0.1         | 0.0         | 0.0         | 0.1         | 0.1         | 0.1         |
|                | - due to revision of GDP                           | 0.0              | 0.0         | 0.1         | 0.0         | -0.3        | -0.5        | -1.2        | -1.2        |
| Netherlands    | <b>Revision in deficit/surplus and debt ratios</b> | <b>0.0</b>       | <b>0.0</b>  | <b>0.0</b>  | <b>0.2</b>  | <b>0.0</b>  | <b>0.0</b>  | <b>0.3</b>  | <b>0.3</b>  |
|                | - due to revision of deficit/surplus or debt       | 0.0              | -0.1        | 0.0         | 0.2         | 0.0         | 0.2         | 0.3         | 0.3         |
|                | - due to revision of GDP                           | 0.0              | 0.0         | 0.0         | 0.0         | 0.0         | -0.2        | 0.0         | 0.0         |
| Austria        | <b>Revision in deficit/surplus and debt ratios</b> | <b>0.0</b>       | <b>0.0</b>  | <b>0.0</b>  | <b>0.1</b>  | <b>0.0</b>  | <b>-0.3</b> | <b>0.1</b>  | <b>0.3</b>  |
|                | - due to revision of deficit/surplus or debt       | 0.0              | 0.0         | 0.0         | 0.1         | 0.0         | 0.0         | 0.1         | 0.1         |
|                | - due to revision of GDP                           | 0.0              | 0.0         | 0.0         | 0.0         | 0.0         | -0.3        | -0.1        | 0.1         |
| Poland         | <b>Revision in deficit/surplus and debt ratios</b> | <b>0.0</b>       | <b>0.0</b>  | <b>0.0</b>  | <b>0.1</b>  | <b>0.0</b>  | <b>0.0</b>  | <b>0.0</b>  | <b>0.1</b>  |
|                | - due to revision of deficit/surplus or debt       | 0.0              | 0.0         | 0.0         | 0.1         | 0.0         | 0.0         | 0.0         | 0.0         |
|                | - due to revision of GDP                           | 0.0              | 0.0         | 0.0         | 0.0         | 0.0         | 0.0         | 0.0         | 0.1         |
| Portugal       | <b>Revision in deficit/surplus and debt ratios</b> | <b>0.0</b>       | <b>0.0</b>  | <b>0.0</b>  | <b>-0.2</b> | <b>0.1</b>  | <b>0.2</b>  | <b>0.2</b>  | <b>0.3</b>  |
|                | - due to revision of deficit/surplus or debt       | 0.0              | 0.0         | 0.0         | -0.2        | 0.1         | 0.2         | 0.2         | 0.2         |
|                | - due to revision of GDP                           | 0.0              | 0.0         | 0.0         | 0.0         | 0.0         | 0.0         | 0.0         | 0.1         |
| Romania        | <b>Revision in deficit/surplus and debt ratios</b> | <b>0.0</b>       | <b>0.0</b>  | <b>0.0</b>  | <b>-0.3</b> | <b>0.0</b>  | <b>0.0</b>  | <b>-0.1</b> | <b>0.1</b>  |
|                | - due to revision of deficit/surplus or debt       | 0.0              | 0.0         | 0.0         | -0.3        | 0.0         | 0.0         | 0.0         | 0.1         |
|                | - due to revision of GDP                           | 0.0              | 0.0         | 0.0         | 0.0         | 0.0         | 0.0         | -0.1        | 0.0         |
| Slovenia       | <b>Revision in deficit/surplus and debt ratios</b> | <b>0.0</b>       | <b>0.1</b>  | <b>0.3</b>  | <b>0.0</b>  | <b>0.0</b>  | <b>-0.2</b> | <b>-0.2</b> | <b>-0.7</b> |
|                | - due to revision of deficit/surplus or debt       | 0.0              | 0.1         | 0.2         | -0.1        | 0.0         | 0.0         | 0.0         | 0.0         |
|                | - due to revision of GDP                           | 0.0              | 0.0         | 0.0         | 0.1         | 0.0         | -0.2        | -0.2        | -0.7        |
| Slovakia       | <b>Revision in deficit/surplus and debt ratios</b> | <b>0.0</b>       | <b>0.0</b>  | <b>0.0</b>  | <b>-0.1</b> | <b>0.0</b>  | <b>0.0</b>  | <b>-0.1</b> | <b>0.0</b>  |
|                | - due to revision of deficit/surplus or debt       | 0.0              | 0.0         | 0.0         | -0.1        | 0.0         | 0.0         | 0.0         | 0.0         |
|                | - due to revision of GDP                           | 0.0              | 0.0         | 0.0         | 0.0         | 0.0         | 0.0         | -0.1        | 0.0         |
| Finland        | <b>Revision in deficit/surplus and debt ratios</b> | <b>0.1</b>       | <b>0.0</b>  | <b>0.0</b>  | <b>-0.1</b> | <b>0.0</b>  | <b>0.1</b>  | <b>0.3</b>  | <b>0.5</b>  |
|                | - due to revision of deficit/surplus or debt       | 0.1              | 0.0         | 0.1         | -0.1        | 0.0         | 0.0         | 0.0         | -0.1        |
|                | - due to revision of GDP                           | 0.0              | 0.0         | 0.0         | 0.0         | 0.0         | 0.1         | 0.3         | 0.6         |
| Sweden         | <b>Revision in deficit/surplus and debt ratios</b> | <b>0.0</b>       | <b>0.0</b>  | <b>0.0</b>  | <b>0.1</b>  | <b>0.0</b>  | <b>0.0</b>  | <b>0.0</b>  | <b>0.0</b>  |
|                | - due to revision of deficit/surplus or debt       | 0.0              | 0.0         | 0.0         | 0.1         | 0.0         | 0.0         | 0.1         | 0.1         |
|                | - due to revision of GDP                           | 0.0              | 0.0         | 0.0         | 0.0         | 0.0         | 0.0         | -0.1        | -0.1        |
| United Kingdom | <b>Revision in deficit/surplus and debt ratios</b> | <b>0.0</b>       | <b>0.0</b>  | <b>0.0</b>  | <b>0.5</b>  | <b>-2.5</b> | <b>-1.8</b> | <b>-0.2</b> | <b>-0.7</b> |
|                | - due to revision of deficit/surplus or debt       | 0.0              | -0.1        | 0.0         | 0.4         | -2.2        | -1.4        | 0.0         | 0.0         |
|                | - due to revision of GDP                           | 0.0              | 0.1         | 0.0         | 0.1         | -0.3        | -0.4        | -0.2        | -0.7        |
| EU27           | <b>Revision in deficit/surplus and debt ratios</b> | <b>0.0</b>       | <b>0.0</b>  | <b>0.0</b>  | <b>0.0</b>  | <b>-0.2</b> | <b>-0.2</b> | <b>0.0</b>  | <b>0.0</b>  |
|                | - due to revision of deficit/surplus or debt       | 0.0              | 0.0         | 0.0         | 0.0         | -0.2        | -0.1        | 0.1         | 0.1         |
|                | - due to revision of GDP                           | 0.0              | 0.0         | 0.0         | 0.0         | 0.0         | -0.1        | -0.1        | -0.1        |
| EA17           | <b>Revision in deficit/surplus and debt ratios</b> | <b>0.0</b>       | <b>0.0</b>  | <b>0.0</b>  | <b>0.0</b>  | <b>0.1</b>  | <b>0.1</b>  | <b>0.0</b>  | <b>0.1</b>  |
|                | - due to revision of deficit/surplus or debt       | 0.0              | 0.0         | 0.0         | 0.0         | 0.1         | 0.1         | 0.2         | 0.1         |
|                | - due to revision of GDP                           | 0.0              | 0.0         | 0.0         | 0.0         | 0.0         | 0.0         | -0.1        | 0.0         |

\* Revisions to deficit/surplus ratios: a positive sign means an improved government balance relative to GDP, and a negative sign a worsening.

## Annex 2

### Supplementary tables for the financial crisis Activities undertaken by government to support financial institutions<sup>1</sup>

**Table 1: Net revenue/cost for general government recorded in ESA95 government deficit**  
Millions of euro

|          |                                                                      | Euro area (EA17) |               |                |               | EU27          |                |                |               |
|----------|----------------------------------------------------------------------|------------------|---------------|----------------|---------------|---------------|----------------|----------------|---------------|
|          |                                                                      | 2008             | 2009          | 2010           | 2011          | 2008          | 2009           | 2010           | 2011          |
| <b>A</b> | <b>Revenue (a+b+c+d)</b>                                             | <b>2 150</b>     | <b>9 533</b>  | <b>14 422</b>  | <b>19 691</b> | <b>30 635</b> | <b>21 120</b>  | <b>19 760</b>  | <b>24 997</b> |
| a)       | Guarantee fees receivable                                            | 247              | 3 374         | 6 164          | 6 024         | 746           | 6 567          | 9 113          | 8 910         |
| b)       | Interest receivable                                                  | 1 463            | 4 828         | 6 527          | 10 333        | 2 630         | 6 259          | 8 366          | 12 048        |
| c)       | Dividends receivable                                                 | 69               | 1 237         | 1 472          | 2 650         | 69            | 1 237          | 1 544          | 3 349         |
| d)       | Other                                                                | 371              | 93            | 259            | 685           | 27 190        | 7 056          | 737            | 691           |
| <b>B</b> | <b>Expenditure (e+f+g+h)</b>                                         | <b>5 244</b>     | <b>16 664</b> | <b>80 641</b>  | <b>29 186</b> | <b>39 289</b> | <b>36 224</b>  | <b>83 856</b>  | <b>33 361</b> |
| e)       | Interest payable <sup>(2)</sup>                                      | 1 530            | 6 275         | 9 297          | 11 795        | 2 266         | 9 806          | 12 073         | 14 433        |
| f)       | Capital injections recorded as deficit-increasing (capital transfer) | 1 100            | 10 097        | 35 609         | 14 816        | 4 185         | 23 039         | 35 814         | 15 192        |
| g)       | Calls on guarantees                                                  | 0                | 0             | 450            | 492           | 0             | 0              | 450            | 1 582         |
| h)       | Other                                                                | 2 614            | 292           | 35 285         | 2 083         | 32 838        | 3 378          | 35 519         | 2 153         |
| <b>C</b> | <b>Net revenue/cost for general government (A-B)</b>                 | <b>-3 091</b>    | <b>-7 131</b> | <b>-66 218</b> | <b>-9 496</b> | <b>-8 651</b> | <b>-15 104</b> | <b>-64 096</b> | <b>-8 364</b> |
| <b>C</b> | <b>Net revenue/cost for general government (A-B) (% of GDP)</b>      | <b>-0.03</b>     | <b>-0.08</b>  | <b>-0.72</b>   | <b>-0.10</b>  | <b>-0.07</b>  | <b>-0.13</b>   | <b>-0.52</b>   | <b>-0.07</b>  |

Source: Eurostat

**Table 2: Outstanding amount of assets, actual liabilities<sup>4</sup> and contingent liabilities of general government**  
Millions of euro<sup>3</sup>

|                                             |                                                         | Euro area (EA17)                                                                 |                |                |                | EU27           |                |                  |                  |                |
|---------------------------------------------|---------------------------------------------------------|----------------------------------------------------------------------------------|----------------|----------------|----------------|----------------|----------------|------------------|------------------|----------------|
|                                             |                                                         | 2008                                                                             | 2009           | 2010           | 2011           | 2008           | 2009           | 2010             | 2011             |                |
| <b>General government</b>                   | <b>Assets (D=a+b+c)</b>                                 | <b>D Closing balance sheet</b>                                                   | <b>175 398</b> | <b>211 130</b> | <b>392 787</b> | <b>354 763</b> | <b>214 321</b> | <b>306 177</b>   | <b>587 104</b>   | <b>500 416</b> |
|                                             |                                                         | a Loans                                                                          | 49 487         | 25 694         | 24 903         | 28 698         | 69 833         | 61 189           | 137 110          | 128 063        |
|                                             |                                                         | b Securities other than shares                                                   | 56 662         | 80 208         | 260 113        | 238 130        | 61 925         | 86 385           | 270 846          | 247 368        |
|                                             |                                                         | c Shares and other equity                                                        | 69 249         | 105 229        | 107 771        | 87 935         | 82 563         | 158 604          | 179 148          | 124 985        |
|                                             | <b>Liabilities (E=d+e)</b>                              | <b>E Closing balance sheet recorded in ESA95 government debt</b>                 | <b>177 828</b> | <b>221 843</b> | <b>473 870</b> | <b>460 066</b> | <b>244 046</b> | <b>360 395</b>   | <b>622 856</b>   | <b>593 899</b> |
| d Loans                                     |                                                         | 25 725                                                                           | 41 271         | 251 119        | 215 269        | 28 587         | 43 029         | 252 114          | 215 768          |                |
| e Securities other than shares <sup>4</sup> |                                                         | 152 103                                                                          | 180 572        | 222 751        | 244 796        | 215 459        | 317 366        | 370 742          | 378 131          |                |
| <b>Outside general government</b>           | <b>Contingent liabilities (F=f+g+h)</b>                 | <b>F Closing balance sheet not recorded in ESA 95 debt</b>                       | <b>509 346</b> | <b>774 093</b> | <b>579 924</b> | <b>580 230</b> | <b>848 832</b> | <b>1 427 678</b> | <b>1 044 770</b> | <b>899 352</b> |
|                                             |                                                         | f Liabilities and assets outside general government under guarantee <sup>5</sup> | 493 156        | 691 012        | 473 003        | 494 796        | 638 358        | 1 113 480        | 808 747          | 728 815        |
|                                             |                                                         | g Securities issued under liquidity schemes <sup>6</sup>                         | 1 890          | 4 617          | 7 939          | 2 708          | 196 174        | 235 734          | 135 846          | 87 232         |
|                                             |                                                         | h Special purpose entities <sup>7</sup>                                          | 14 300         | 78 465         | 98 982         | 82 726         | 14 300         | 78 465           | 100 177          | 83 305         |
| <b>(% of GDP)</b>                           | <b>D Closing balance sheet - assets</b>                 | <b>1.9</b>                                                                       | <b>2.4</b>     | <b>4.3</b>     | <b>3.8</b>     | <b>1.7</b>     | <b>2.6</b>     | <b>4.8</b>       | <b>4.0</b>       |                |
|                                             | <b>E Closing balance sheet - liabilities</b>            | <b>1.9</b>                                                                       | <b>2.5</b>     | <b>5.2</b>     | <b>4.9</b>     | <b>2.0</b>     | <b>3.1</b>     | <b>5.1</b>       | <b>4.7</b>       |                |
|                                             | <b>F Closing balance sheet - contingent liabilities</b> | <b>5.5</b>                                                                       | <b>8.7</b>     | <b>6.3</b>     | <b>6.2</b>     | <b>6.8</b>     | <b>12.1</b>    | <b>8.5</b>       | <b>7.1</b>       |                |

Source: Eurostat

The supplementary tables for the financial crisis aim to give a complete picture of the actual and potential impact on government deficit and debt due to government interventions directly related to the support of financial institutions. Support measures for non-financial institutions or general economic support measures are not included in the tables.

The first table relates to data on transactions which are recorded in government accounts and have an actual impact on the EDP deficit/surplus. The second table relates to data on stocks of financial assets and liabilities

arising from interventions relating to support of financial institutions. It distinguishes between activities which have contributed to government liabilities (included in government debt) and activities which may potentially contribute to government liabilities in the future, but which are currently recorded as contingent on future events (not included for the moment in government debt).

In particular, line C in table 1 shows the net impact in terms of government surplus/deficit for government due to direct government interventions in the financial crisis. It can be seen that government interventions in the context of the financial crisis increased the government deficit in the **EU27** by 8.36 bn euro (0.07% of GDP) in 2011. For the **euro area**, the net impact amounted to 9.50 bn (0.10% of GDP) in 2011.

Table 2 shows that the impact on government debt in 2011 (closing balance sheet for liabilities) for the **EU27** was 593.90 bn euro (4.7% of GDP), while for the **euro area** the figure was 460.07 bn (4.9% of GDP). As far as contingent liabilities are concerned (with a potential impact on debt and possibly on deficit), they amounted to 899.35 bn (7.1% of GDP) for the **EU27** and to 580.23 bn (6.2% of GDP) for the **euro area**.

Further tables on actual and potential impact on government deficit and debt, by Member State, can be found on Eurostat's website at:

[http://epp.eurostat.ec.europa.eu/portal/page/portal/government\\_finance\\_statistics/excessive\\_deficit/supplementary\\_tables\\_financial\\_turmoil](http://epp.eurostat.ec.europa.eu/portal/page/portal/government_finance_statistics/excessive_deficit/supplementary_tables_financial_turmoil)

1. These tables relate to activities undertaken to support financial institutions. It does not include wider economic stimulus packages.
2. Interest payable includes actual interest where relevant, and otherwise imputed interest on financing.
3. The appropriate valuation for all entries in Table 2 is nominal value, except for ordinary quoted shares held as assets (which are recorded at market value).
4. By convention, for the liabilities entry under "general government" (which is the impact on Maastricht Debt from activities to support financial institutions), there is assumed to be a direct impact on government debt from activities which imply a transfer of cash from government (e.g. transfer of cash relating to capital injections, loans granted, purchase of financial assets), except for the impact from direct borrowing. In addition, imputations relating to the financing costs should be included.
5. Guarantees covered are those granted by general government to non-general government financial institutions. It does not include guarantees on bank deposits, or guarantees on the liabilities of special purpose entities included in (h). It is only the value of active guarantees, not announced ceilings for schemes. It also includes guarantees on assets, which would imply incurrence of government liability in case of a call.
6. Liquidity schemes included here are those where the government securities used are not recorded in government debt (see the Eurostat Decision and accompanying guidance note for details). By convention, they are recorded as "contingent liabilities outside the general government", as for guarantees, though it should be noted that the exposure of government is likely to be limited.
7. Special purpose entities included here are those where government has a significant role, including a guarantee, but which are classified outside the general government sector (see the Eurostat Decision and accompanying guidance note for details). Their liabilities are recorded outside the general government sector (as contingent liabilities of general government).
