# Supplementary material
Source: publisher figshare collection journal article supplement (https://tandf.figshare.com/articles/dataset/_/4793563)
Supplement: Supplementary file 20 [file 1]

72/2015 - 21 April 2015

Provision of deficit and debt data for 2014 - first notification

## Euro area and EU28 government deficit at 2.4% and 2.9% of GDP respectively

Government debt at 91.9% and 86.8%

In 2014, the government deficit<sup>1</sup> of both the **euro area**<sup>2</sup> (EA19) and the **EU28**<sup>2</sup> decreased in absolute terms compared with 2013, while the government debt<sup>1</sup> rose in both zones. In the **euro area** the government deficit to GDP ratio decreased from 2.9% in 2013 to 2.4% in 2014, and in the **EU28**<sup>3</sup> from 3.2% to 2.9%. In the **euro area** the government debt to GDP ratio increased from 90.9% at the end of 2013 to 91.9% at the end of 2014, and in the **EU28**<sup>3</sup> from 85.5% to 86.8%.

|                                      |                | 2011       | 2012       | 2013       | 2014       |
|--------------------------------------|----------------|------------|------------|------------|------------|
| <b>Euro area (EA19)</b>              |                |            |            |            |            |
| GDP market prices (mp)               | (million euro) | 9 799 488  | 9 840 073  | 9 931 690  | 10 115 966 |
| Government deficit (-) / surplus (+) | (million euro) | -405 680   | -355 085   | -286 340   | -245 876   |
|                                      | (% of GDP)     | -4.1       | -3.6       | -2.9       | -2.4       |
| Government expenditure               | (% of GDP)     | 49.0       | 49.5       | 49.4       | 49.0       |
| Government revenue                   | (% of GDP)     | 44.8       | 45.9       | 46.6       | 46.6       |
| Government debt                      | (million euro) | 8 404 738  | 8 766 691  | 9 029 600  | 9 292 618  |
|                                      | (% of GDP)     | 85.8       | 89.1       | 90.9       | 91.9       |
| <b>EU28</b>                          |                |            |            |            |            |
| GDP market prices (mp)               | (million euro) | 13 173 525 | 13 420 148 | 13 520 989 | 13 931 719 |
| Government deficit (-) / surplus (+) | (million euro) | -593 166   | -567 410   | -436 819   | -401 861   |
|                                      | (% of GDP)     | -4.5       | -4.2       | -3.2       | -2.9       |
| Government expenditure               | (% of GDP)     | 48.5       | 49.0       | 48.6       | 48.1       |
| Government revenue                   | (% of GDP)     | 44.0       | 44.7       | 45.4       | 45.2       |
| Government debt                      | (million euro) | 10 656 258 | 11 227 119 | 11 561 569 | 12 094 614 |
|                                      | (% of GDP)     | 80.9       | 83.7       | 85.5       | 86.8       |

In 2014, **Denmark** (+1.2%), **Germany** (+0.7%), **Estonia** and **Luxembourg** (+0.6% each) registered a government surplus, and the lowest government deficits in percentage of GDP were recorded in **Lithuania** (-0.7%), **Latvia** (-1.4%) and **Romania** (-1.5%). Twelve Member States had deficits higher than 3% of GDP: **Cyprus** (-8.8%), **Spain** (-5.8%), **Croatia** and the **United Kingdom** (both -5.7%), **Slovenia** (-4.9%), **Portugal** (-4.5%), **Ireland** (-4.1%), **France** (-4.0%), **Greece** (-3.5%), **Belgium**, **Poland** and **Finland** (all -3.2%).

At the end of 2014, the lowest ratios of government debt to GDP were recorded in **Estonia** (10.6%), **Luxembourg** (23.6%), **Bulgaria** (27.6%), **Romania** (39.8%) and **Latvia** (40.0%). Sixteen Member States had government debt ratios higher than 60% of GDP, with the highest registered in **Greece** (177.1%), **Italy** (132.1%), **Portugal** (130.2%), **Ireland** (109.7%), **Cyprus** (107.5%) and **Belgium** (106.5%).

In 2014, government expenditure<sup>4</sup> in the **euro area** was equivalent to 49.0% of GDP and government revenue<sup>4</sup> to 46.6%. The figures for the **EU28** were 48.1% and 45.2% respectively. In both zones, the government expenditure ratio decreased between 2013 and 2014, while the government revenue ratio remained stable for the **euro area** and slightly decreased for the **EU28**.

## Reservations on reported data<sup>5</sup>

**Bulgaria:** Eurostat is expressing a reservation on the quality of the data reported by Bulgaria in relation to the sector classification of the Deposit Insurance Fund and the impact on the government deficit of the fund's repayment of the guaranteed deposits (3.7 bn BGN) in the Corporate Commercial Bank. The impact of the transaction will be assessed by Eurostat in cooperation with the Bulgarian statistical authorities during the coming months. This will most likely result in an increase of the government deficit.

**Portugal:** Eurostat is expressing a reservation on the quality of the data reported by Portugal in relation to the capitalisation of Novo Banco. In the third quarter of 2014, the Portuguese Resolution Fund injected 4.9 bn euro (2.8% of GDP) into Novo Banco. In this EDP notification, the transaction has provisionally been recorded by the Portuguese authorities as a financial transaction for its full amount (due to lack of information) without any impact on the government deficit. The final impact of the transaction will be assessed by Eurostat in cooperation with the Portuguese statistical authorities during the coming months following the outcome of the privatisation process of Novo Banco and the final amount which the Portuguese government will obtain from the sale. This will most likely result in an increase of the government deficit.

## Amendment by Eurostat to reported data<sup>6</sup>

Eurostat has made no amendments to the data reported by Member States.

## Other issues

### *i. Intergovernmental lending*

For the purpose of proper consolidation of general government debt in European aggregates and to provide users with information, Eurostat is collecting and publishing data on government loans to other EU governments, including those made through the European Financial Stability Facility (EFSF). For the years 2011 to 2014 the intergovernmental lending figures relate mainly to lending to Greece, Ireland and Portugal.

### *ii. Background note and supplementary tables on government interventions in the context of the financial crisis*

Eurostat publishes supplementary tables by Member State on the impact of the financial crisis on its website: <http://ec.europa.eu/eurostat/web/government-finance-statistics/excessive-deficit/supplementary-tables-financial-crisis>

Eurostat also publishes a background note providing further information on the supplementary tables, including summary tables for the EU and the euro area, at:

<http://ec.europa.eu/eurostat/documents/1015035/2022710/Background-note-fin-crisis-Apr-2015-final.pdf>

Table 2 of the background note shows government deficit/surplus data for 2013 and 2014 excluding the impacts of government interventions to support financial institutions. It should be noted that this adjusted measure of government deficit/surplus is only intended to be an improvement in the presentation of data for users.

### *iii. Stock of liabilities of trade credits and advances*

Eurostat publishes on its website, as complementary information on government liabilities, data on trade credits and advances, as reported by Member States for the years 2011 to 2014:

<http://ec.europa.eu/eurostat/documents/1015035/2022675/Note-on-AF.81L-Apr2015.pdf>

It should be noted that, according to Council Regulation (EC) 479/2009, as amended, the liabilities in trade credits and advances of government units are not part of "Maastricht debt".

### *iv. Valuation of debt instruments*

Eurostat is currently reviewing, in co-operation with Member States, the valuation of certain debt instruments, such as non-negotiable saving and treasury certificates, for EDP purposes. This may lead to a future increase in government debt in some Member States due to the inclusion of accumulated capitalised interest under these instruments.

## Background

In this News Release, **Eurostat, the statistical office of the European Union**, is providing<sup>7</sup> government deficit and debt data based on figures reported in the **first 2015 notification** by EU Member States for the years 2011-2014, for the application of the excessive deficit procedure (EDP). This notification is based on the ESA 2010 system of national accounts. This News Release also includes data on government expenditure and revenue.

Eurostat will also be releasing information on the underlying government sector accounts, as well as on the contribution of deficit/surplus and other relevant factors to the variation in the debt level (stock-flow adjustment), on the government finance statistics section on its website:

<http://ec.europa.eu/eurostat/web/government-finance-statistics>

1. According to the Protocol on the excessive deficit procedure annexed to the EC Treaty, government deficit (surplus) means the net borrowing (net lending) of the whole general government sector (central government, state government, local government and social security funds). It is calculated according to national accounts concepts (European System of Accounts, ESA 2010). Government debt is the consolidated gross debt of the whole general government sector outstanding at the end of the year (at nominal value).
  - Table of euro area and EU28 aggregates: the data are in euro. For those countries not belonging to the euro area, the rate of conversion into euro is as follows:
    - for deficit / surplus and GDP data, the annual average exchange rate;
    - for the stock of government debt, the end of year exchange rate.
  - Table of national data: these are in national currencies. For Latvia and Lithuania, data for the years prior to the adoption of the euro have been converted into euro according to the irrevocable conversion rate.
2. Euro area (EA19): Belgium, Germany, Estonia, Ireland, Greece, Spain, France, Italy, Cyprus, Latvia, Lithuania, Luxembourg, Malta, Netherlands, Austria, Portugal, Slovenia, Slovakia and Finland. In the attached table, the euro area is defined as including Latvia and Lithuania for the full period, although Latvia joined the euro area on 1 January 2014 and Lithuania on 1 January 2015.

Up to 30 June 2013, the European Union (EU27) included 27 Member States. From 1 July 2013 the European Union (EU28) also includes Croatia. In the attached table, all periods refer to the EU28.
3. In the previous provision of data for the excessive deficit procedure, the 2013 government deficit for the EU28 was 3.2% of GDP and the government debt was 85.4% of GDP. See News Release 158/2014 of 21 October 2014.
4. Government expenditure and revenue are reported to Eurostat under the ESA 2010 transmission programme. They cover non-financial transactions of general government, and include both current and capital transactions. For definitions, see Regulation (EU) No 549/2013 of the European Parliament and of the Council of 21 May 2013 on the European system of national and regional accounts in the European Union.
5. The term “reservations” is defined in article 15 (1) of Council Regulation (EC) 479/2009, as amended. The Commission (Eurostat) expresses reservations when it has doubts on the quality of the reported data.
6. According to Article 15 (2) of Council Regulation (EC) 479/2009, as amended, the Commission (Eurostat) may amend actual data reported by Member States and provide the amended data and a justification of the amendment where there is evidence that actual data reported by Member States do not comply with the quality requirements (compliance with accounting rules, completeness, reliability, timeliness and consistency of statistical data).
7. According to Article 14 (1) of Council Regulation (EC) 479/2009, as amended, Eurostat provides the actual government deficit and debt data for the application of the Protocol on the excessive deficit procedure, within three weeks after the reporting deadlines. This provision of data shall be effected through publication.

*For further information on the methodology of statistics reported under the excessive deficit procedure, please see the Eurostat publication "Manual on government deficit and debt – Implementation of ESA 2010", 2014 edition:*  
<http://ec.europa.eu/eurostat/documents/3859598/5937189/KS-GQ-14-010-EN.PDF/>

Issued by:  
**Eurostat Press Office**

**Tim ALLEN**  
**Tel: +352-4301-33 444**  
**[eurostat-pressoffice@ec.europa.eu](mailto:eurostat-pressoffice@ec.europa.eu)**

 **Media requests:** Eurostat media support / Tel: +352-4301-33 408 / [eurostat-mediasupport@ec.europa.eu](mailto:eurostat-mediasupport@ec.europa.eu)

 [ec.europa.eu/eurostat/](http://ec.europa.eu/eurostat/)

 [@EU\\_Eurostat](https://twitter.com/EU_Eurostat)

## GDP, government deficit/surplus and debt in the EU (in national currencies)

|                                                                           |                | 2011      | 2012      | 2013      | 2014      |
|---------------------------------------------------------------------------|----------------|-----------|-----------|-----------|-----------|
| <b>Belgium</b>                                                            |                |           |           |           |           |
| GDP mp                                                                    | (million euro) | 379 991   | 388 254   | 395 262   | 402 270   |
| Government deficit (-) / surplus (+)                                      | (million euro) | -15 547   | -16 073   | -11 534   | -13 057   |
|                                                                           | (% of GDP)     | -4.1      | -4.1      | -2.9      | -3.2      |
| Government expenditure                                                    | (% of GDP)     | 53.4      | 54.8      | 54.5      | 54.3      |
| Government revenue                                                        | (% of GDP)     | 49.3      | 50.7      | 51.5      | 51.1      |
| Government debt                                                           | (million euro) | 387 629   | 403 175   | 412 770   | 428 365   |
|                                                                           | (% of GDP)     | 102.0     | 103.8     | 104.4     | 106.5     |
| memo: intergovernmental lending<br>in the context of the financial crisis | (million euro) | 2 586     | 7 198     | 8 600     | 8 956     |
|                                                                           | (% of GDP)     | 0.7       | 1.9       | 2.2       | 2.2       |
| <b>Bulgaria</b>                                                           |                |           |           |           |           |
| GDP mp                                                                    | (million BGN)  | 78 434    | 80 044    | 80 282    | 82 164    |
| Government deficit (-) / surplus (+)                                      | (million BGN)  | -1 590    | -522      | -694      | -2 337    |
|                                                                           | (% of GDP)     | -2.0      | -0.7      | -0.9      | -2.8      |
| Government expenditure                                                    | (% of GDP)     | 34.7      | 35.2      | 38.3      | 39.2      |
| Government revenue                                                        | (% of GDP)     | 32.6      | 34.5      | 37.4      | 36.4      |
| Government debt                                                           | (million BGN)  | 12 291    | 14 388    | 14 731    | 22 694    |
|                                                                           | (% of GDP)     | 15.7      | 18.0      | 18.3      | 27.6      |
| memo: intergovernmental lending<br>in the context of the financial crisis | (million BGN)  | 0         | 0         | 0         | 0         |
|                                                                           | (% of GDP)     | 0.0       | 0.0       | 0.0       | 0.0       |
| <b>Czech Republic</b>                                                     |                |           |           |           |           |
| GDP mp                                                                    | (million CZK)  | 4 022 410 | 4 047 675 | 4 086 260 | 4 266 141 |
| Government deficit (-) / surplus (+)                                      | (million CZK)  | -108 860  | -157 889  | -47 206   | -84 558   |
|                                                                           | (% of GDP)     | -2.7      | -3.9      | -1.2      | -2.0      |
| Government expenditure                                                    | (% of GDP)     | 42.4      | 43.8      | 41.9      | 42.0      |
| Government revenue                                                        | (% of GDP)     | 39.7      | 39.9      | 40.8      | 40.1      |
| Government debt                                                           | (million CZK)  | 1 604 009 | 1 803 585 | 1 839 726 | 1 816 137 |
|                                                                           | (% of GDP)     | 39.9      | 44.6      | 45.0      | 42.6      |
| memo: intergovernmental lending<br>in the context of the financial crisis | (million CZK)  | 0         | 0         | 0         | 0         |
|                                                                           | (% of GDP)     | 0.0       | 0.0       | 0.0       | 0.0       |
| <b>Denmark</b>                                                            |                |           |           |           |           |
| GDP mp                                                                    | (million DKK)  | 1 833 404 | 1 866 779 | 1 886 393 | 1 919 192 |
| Government deficit (-) / surplus (+)                                      | (million DKK)  | -37 966   | -68 442   | -20 024   | 23 942    |
|                                                                           | (% of GDP)     | -2.1      | -3.7      | -1.1      | 1.2       |
| Government expenditure                                                    | (% of GDP)     | 56.8      | 58.8      | 57.1      | 57.2      |
| Government revenue                                                        | (% of GDP)     | 54.8      | 55.1      | 56.0      | 58.5      |
| Government debt                                                           | (million DKK)  | 850 862   | 850 553   | 849 761   | 867 947   |
|                                                                           | (% of GDP)     | 46.4      | 45.6      | 45.0      | 45.2      |
| memo: intergovernmental lending<br>in the context of the financial crisis | (million DKK)  | 0         | 1 500     | 2 984     | 2 977     |
|                                                                           | (% of GDP)     | 0.0       | 0.1       | 0.2       | 0.2       |
| <b>Germany</b>                                                            |                |           |           |           |           |
| GDP mp                                                                    | (million euro) | 2 699 100 | 2 749 900 | 2 809 480 | 2 903 790 |
| Government deficit (-) / surplus (+)                                      | (million euro) | -23 272   | 2 606     | 4 172     | 19 423    |
|                                                                           | (% of GDP)     | -0.9      | 0.1       | 0.1       | 0.7       |
| Government expenditure                                                    | (% of GDP)     | 44.6      | 44.2      | 44.3      | 43.9      |
| Government revenue                                                        | (% of GDP)     | 43.7      | 44.3      | 44.5      | 44.6      |
| Government debt                                                           | (million euro) | 2 101 823 | 2 179 813 | 2 166 021 | 2 170 000 |
|                                                                           | (% of GDP)     | 77.9      | 79.3      | 77.1      | 74.7      |
| memo: intergovernmental lending<br>in the context of the financial crisis | (million euro) | 19 994    | 56 091    | 67 024    | 69 804    |
|                                                                           | (% of GDP)     | 0.7       | 2.0       | 2.4       | 2.4       |

## GDP, government deficit/surplus and debt in the EU (in national currencies)

|                                                                           |                | 2011      | 2012      | 2013      | 2014      |
|---------------------------------------------------------------------------|----------------|-----------|-----------|-----------|-----------|
| <b>Estonia</b>                                                            |                |           |           |           |           |
| GDP mp                                                                    | (million euro) | 16 404    | 17 637    | 18 739    | 19 526    |
| Government deficit (-) / surplus (+)                                      | (million euro) | 195       | -39       | -40       | 121       |
|                                                                           | (% of GDP)     | 1.2       | -0.2      | -0.2      | 0.6       |
| Government expenditure                                                    | (% of GDP)     | 38.0      | 39.8      | 38.8      | 38.8      |
| Government revenue                                                        | (% of GDP)     | 39.2      | 39.6      | 38.5      | 39.4      |
| Government debt                                                           | (million euro) | 984       | 1 712     | 1 888     | 2 073     |
|                                                                           | (% of GDP)     | 6.0       | 9.7       | 10.1      | 10.6      |
| memo: intergovernmental lending<br>in the context of the financial crisis | (million euro) | 14        | 355       | 458       | 485       |
|                                                                           | (% of GDP)     | 0.1       | 2.0       | 2.4       | 2.5       |
| <b>Ireland</b>                                                            |                |           |           |           |           |
| GDP mp                                                                    | (million euro) | 171 042   | 172 755   | 174 791   | 185 412   |
| Government deficit (-) / surplus (+)                                      | (million euro) | -21 804   | -14 065   | -10 152   | -7 629    |
|                                                                           | (% of GDP)     | -12.7     | -8.1      | -5.8      | -4.1      |
| Government expenditure                                                    | (% of GDP)     | 46.3      | 42.3      | 40.7      | 39.0      |
| Government revenue                                                        | (% of GDP)     | 33.5      | 34.2      | 34.9      | 34.9      |
| Government debt                                                           | (million euro) | 190 123   | 210 238   | 215 328   | 203 319   |
|                                                                           | (% of GDP)     | 111.2     | 121.7     | 123.2     | 109.7     |
| memo: intergovernmental lending<br>in the context of the financial crisis | (million euro) | 347       | 347       | 347       | 347       |
|                                                                           | (% of GDP)     | 0.2       | 0.2       | 0.2       | 0.2       |
| <b>Greece</b>                                                             |                |           |           |           |           |
| GDP mp                                                                    | (million euro) | 207 752   | 194 204   | 182 438   | 179 081   |
| Government deficit (-) / surplus (+)                                      | (million euro) | -21 221   | -16 871   | -22 498   | -6 356    |
|                                                                           | (% of GDP)     | -10.2     | -8.7      | -12.3     | -3.5      |
| Government expenditure                                                    | (% of GDP)     | 54.0      | 54.4      | 60.1      | 49.3      |
| Government revenue                                                        | (% of GDP)     | 43.8      | 45.7      | 47.8      | 45.8      |
| Government debt                                                           | (million euro) | 355 977   | 304 714   | 319 178   | 317 094   |
|                                                                           | (% of GDP)     | 171.3     | 156.9     | 175.0     | 177.1     |
| memo: intergovernmental lending<br>in the context of the financial crisis | (million euro) | 0         | 0         | 0         | 0         |
|                                                                           | (% of GDP)     | 0.0       | 0.0       | 0.0       | 0.0       |
| <b>Spain</b>                                                              |                |           |           |           |           |
| GDP mp                                                                    | (million euro) | 1 075 147 | 1 055 158 | 1 049 181 | 1 058 469 |
| Government deficit (-) / surplus (+)                                      | (million euro) | -101 265  | -108 903  | -71 291   | -61 391   |
|                                                                           | (% of GDP)     | -9.4      | -10.3     | -6.8      | -5.8      |
| Government expenditure                                                    | (% of GDP)     | 45.4      | 47.3      | 44.3      | 43.6      |
| Government revenue                                                        | (% of GDP)     | 36.0      | 37.0      | 37.5      | 37.8      |
| Government debt                                                           | (million euro) | 743 531   | 890 978   | 966 170   | 1 033 857 |
|                                                                           | (% of GDP)     | 69.2      | 84.4      | 92.1      | 97.7      |
| memo: intergovernmental lending<br>in the context of the financial crisis | (million euro) | 8 717     | 24 542    | 29 342    | 30 566    |
|                                                                           | (% of GDP)     | 0.8       | 2.3       | 2.8       | 2.9       |
| <b>France</b>                                                             |                |           |           |           |           |
| GDP mp                                                                    | (million euro) | 2 059 284 | 2 086 815 | 2 116 565 | 2 144 546 |
| Government deficit (-) / surplus (+)                                      | (million euro) | -104 961  | -100 448  | -86 397   | -84 839   |
|                                                                           | (% of GDP)     | -5.1      | -4.8      | -4.1      | -4.0      |
| Government expenditure                                                    | (% of GDP)     | 55.9      | 56.8      | 57.0      | 57.2      |
| Government revenue                                                        | (% of GDP)     | 50.8      | 52.0      | 52.9      | 53.2      |
| Government debt                                                           | (million euro) | 1 754 356 | 1 869 155 | 1 953 409 | 2 037 772 |
|                                                                           | (% of GDP)     | 85.2      | 89.6      | 92.3      | 95.0      |
| memo: intergovernmental lending<br>in the context of the financial crisis | (million euro) | 14 929    | 42 030    | 50 266    | 52 362    |
|                                                                           | (% of GDP)     | 0.7       | 2.0       | 2.4       | 2.4       |

## GDP, government deficit/surplus and debt in the EU (in national currencies)

|                                                                           |                | 2011      | 2012      | 2013      | 2014      |
|---------------------------------------------------------------------------|----------------|-----------|-----------|-----------|-----------|
| <b>Croatia</b>                                                            |                |           |           |           |           |
| GDP mp                                                                    | (million HRK)  | 332 587   | 330 456   | 330 135   | 328 927   |
| Government deficit (-) / surplus (+)                                      | (million HRK)  | -25 038   | -17 504   | -17 672   | -18 844   |
|                                                                           | (% of GDP)     | -7.5      | -5.3      | -5.4      | -5.7      |
| Government expenditure                                                    | (% of GDP)     | 48.5      | 47.0      | 47.7      | 48.0      |
| Government revenue                                                        | (% of GDP)     | 41.0      | 41.7      | 42.4      | 42.3      |
| Government debt                                                           | (million HRK)  | 211 898   | 228 790   | 266 134   | 279 569   |
|                                                                           | (% of GDP)     | 63.7      | 69.2      | 80.6      | 85.0      |
| memo: intergovernmental lending<br>in the context of the financial crisis | (million HRK)  | 0         | 0         | 0         | 0         |
|                                                                           | (% of GDP)     | 0.0       | 0.0       | 0.0       | 0.0       |
| <b>Italy</b>                                                              |                |           |           |           |           |
| GDP mp                                                                    | (million euro) | 1 638 857 | 1 615 131 | 1 609 462 | 1 616 048 |
| Government deficit (-) / surplus (+)                                      | (million euro) | -57 154   | -48 310   | -47 455   | -49 056   |
|                                                                           | (% of GDP)     | -3.5      | -3.0      | -2.9      | -3.0      |
| Government expenditure                                                    | (% of GDP)     | 49.1      | 50.8      | 50.9      | 51.1      |
| Government revenue                                                        | (% of GDP)     | 45.6      | 47.8      | 48.0      | 48.1      |
| Government debt                                                           | (million euro) | 1 907 479 | 1 988 901 | 2 068 722 | 2 134 920 |
|                                                                           | (% of GDP)     | 116.4     | 123.1     | 128.5     | 132.1     |
| memo: intergovernmental lending<br>in the context of the financial crisis | (million euro) | 13 118    | 36 932    | 44 156    | 45 998    |
|                                                                           | (% of GDP)     | 0.8       | 2.3       | 2.7       | 2.8       |
| <b>Cyprus</b>                                                             |                |           |           |           |           |
| GDP mp                                                                    | (million euro) | 19 487    | 19 411    | 18 119    | 17 506    |
| Government deficit (-) / surplus (+)                                      | (million euro) | -1 122    | -1 130    | -891      | -1 544    |
|                                                                           | (% of GDP)     | -5.8      | -5.8      | -4.9      | -8.8      |
| Government expenditure                                                    | (% of GDP)     | 42.8      | 42.1      | 41.4      | 49.1      |
| Government revenue                                                        | (% of GDP)     | 37.0      | 36.3      | 36.5      | 40.3      |
| Government debt                                                           | (million euro) | 12 869    | 15 431    | 18 519    | 18 819    |
|                                                                           | (% of GDP)     | 66.0      | 79.5      | 102.2     | 107.5     |
| memo: intergovernmental lending<br>in the context of the financial crisis | (million euro) | 144       | 405       | 393       | 362       |
|                                                                           | (% of GDP)     | 0.7       | 2.1       | 2.2       | 2.1       |
| <b>Latvia</b>                                                             |                |           |           |           |           |
| GDP mp                                                                    | (million euro) | 20 297    | 22 043    | 23 222    | 24 060    |
| Government deficit (-) / surplus (+)                                      | (million euro) | -678      | -175      | -172      | -347      |
|                                                                           | (% of GDP)     | -3.3      | -0.8      | -0.7      | -1.4      |
| Government expenditure                                                    | (% of GDP)     | 38.8      | 36.5      | 36.0      | 36.9      |
| Government revenue                                                        | (% of GDP)     | 35.5      | 35.7      | 35.3      | 35.5      |
| Government debt                                                           | (million euro) | 8 659     | 9 013     | 8 876     | 9 633     |
|                                                                           | (% of GDP)     | 42.7      | 40.9      | 38.2      | 40.0      |
| memo: intergovernmental lending<br>in the context of the financial crisis | (million euro) | 0         | 0         | 0         | 0         |
|                                                                           | (% of GDP)     | 0.0       | 0.0       | 0.0       | 0.0       |
| <b>Lithuania</b>                                                          |                |           |           |           |           |
| GDP mp                                                                    | (million euro) | 31 247    | 33 314    | 34 956    | 36 288    |
| Government deficit (-) / surplus (+)                                      | (million euro) | -2 796    | -1 049    | -917      | -242      |
|                                                                           | (% of GDP)     | -8.9      | -3.1      | -2.6      | -0.7      |
| Government expenditure                                                    | (% of GDP)     | 42.5      | 36.1      | 35.5      | 34.9      |
| Government revenue                                                        | (% of GDP)     | 33.6      | 33.0      | 32.9      | 34.3      |
| Government debt                                                           | (million euro) | 11 629    | 13 265    | 13 550    | 14 826    |
|                                                                           | (% of GDP)     | 37.2      | 39.8      | 38.8      | 40.9      |
| memo: intergovernmental lending<br>in the context of the financial crisis | (million euro) | 0         | 0         | 0         | 0         |
|                                                                           | (% of GDP)     | 0.0       | 0.0       | 0.0       | 0.0       |

## GDP, government deficit/surplus and debt in the EU (in national currencies)

|                                                                           |                | 2011       | 2012       | 2013       | 2014       |
|---------------------------------------------------------------------------|----------------|------------|------------|------------|------------|
| <b>Luxembourg</b>                                                         |                |            |            |            |            |
| GDP mp                                                                    | (million euro) | 42 410     | 43 812     | 45 288     | 47 107     |
| Government deficit (-) / surplus (+)                                      | (million euro) | 166        | 56         | 388        | 289        |
|                                                                           | (% of GDP)     | 0.4        | 0.1        | 0.9        | 0.6        |
| Government expenditure                                                    | (% of GDP)     | 42.3       | 43.5       | 43.6       | 44.0       |
| Government revenue                                                        | (% of GDP)     | 42.7       | 43.6       | 44.4       | 44.7       |
| Government debt                                                           | (million euro) | 8 104      | 9 612      | 10 891     | 11 123     |
|                                                                           | (% of GDP)     | 19.1       | 21.9       | 24.0       | 23.6       |
| memo: intergovernmental lending<br>in the context of the financial crisis | (million euro) | 183        | 516        | 617        | 643        |
|                                                                           | (% of GDP)     | 0.4        | 1.2        | 1.4        | 1.4        |
| <b>Hungary</b>                                                            |                |            |            |            |            |
| GDP mp                                                                    | (million HUF)  | 28 035 033 | 28 548 800 | 29 846 259 | 31 890 602 |
| Government deficit (-) / surplus (+)                                      | (million HUF)  | -1 537 890 | -659 282   | -733 710   | -817 646   |
|                                                                           | (% of GDP)     | -5.5       | -2.3       | -2.5       | -2.6       |
| Government expenditure                                                    | (% of GDP)     | 49.9       | 48.7       | 49.8       | 50.1       |
| Government revenue                                                        | (% of GDP)     | 44.4       | 46.4       | 47.3       | 47.6       |
| Government debt                                                           | (million HUF)  | 22 720 746 | 22 414 051 | 23 085 005 | 24 525 014 |
|                                                                           | (% of GDP)     | 81.0       | 78.5       | 77.3       | 76.9       |
| memo: intergovernmental lending<br>in the context of the financial crisis | (million HUF)  | 0          | 0          | 0          | 0          |
|                                                                           | (% of GDP)     | 0.0        | 0.0        | 0.0        | 0.0        |
| <b>Malta</b>                                                              |                |            |            |            |            |
| GDP mp                                                                    | (million euro) | 6 903      | 7 226      | 7 571      | 7 961      |
| Government deficit (-) / surplus (+)                                      | (million euro) | -178       | -264       | -194       | -168       |
|                                                                           | (% of GDP)     | -2.6       | -3.6       | -2.6       | -2.1       |
| Government expenditure                                                    | (% of GDP)     | 40.9       | 42.4       | 42.3       | 43.8       |
| Government revenue                                                        | (% of GDP)     | 38.3       | 38.7       | 39.7       | 41.7       |
| Government debt                                                           | (million euro) | 4 809      | 4 872      | 5 241      | 5 417      |
|                                                                           | (% of GDP)     | 69.7       | 67.4       | 69.2       | 68.0       |
| memo: intergovernmental lending<br>in the context of the financial crisis | (million euro) | 66         | 187        | 223        | 232        |
|                                                                           | (% of GDP)     | 1.0        | 2.6        | 2.9        | 2.9        |
| <b>Netherlands</b>                                                        |                |            |            |            |            |
| GDP mp                                                                    | (million euro) | 642 929    | 640 644    | 642 851    | 655 375    |
| Government deficit (-) / surplus (+)                                      | (million euro) | -27 835    | -25 330    | -14 629    | -15 035    |
|                                                                           | (% of GDP)     | -4.3       | -4.0       | -2.3       | -2.3       |
| Government expenditure                                                    | (% of GDP)     | 47.0       | 47.5       | 46.8       | 46.6       |
| Government revenue                                                        | (% of GDP)     | 42.7       | 43.5       | 44.5       | 44.3       |
| Government debt                                                           | (million euro) | 393 872    | 426 145    | 441 039    | 451 006    |
|                                                                           | (% of GDP)     | 61.3       | 66.5       | 68.6       | 68.8       |
| memo: intergovernmental lending<br>in the context of the financial crisis | (million euro) | 4 187      | 11 791     | 14 096     | 14 684     |
|                                                                           | (% of GDP)     | 0.7        | 1.8        | 2.2        | 2.2        |
| <b>Austria</b>                                                            |                |            |            |            |            |
| GDP mp                                                                    | (million euro) | 308 675    | 317 213    | 322 595    | 328 996    |
| Government deficit (-) / surplus (+)                                      | (million euro) | -7 907     | -6 919     | -4 144     | -7 916     |
|                                                                           | (% of GDP)     | -2.6       | -2.2       | -1.3       | -2.4       |
| Government expenditure                                                    | (% of GDP)     | 50.8       | 50.9       | 50.9       | 52.3       |
| Government revenue                                                        | (% of GDP)     | 48.2       | 48.7       | 49.6       | 49.9       |
| Government debt                                                           | (million euro) | 253 293    | 258 526    | 260 977    | 278 089    |
|                                                                           | (% of GDP)     | 82.1       | 81.5       | 80.9       | 84.5       |
| memo: intergovernmental lending<br>in the context of the financial crisis | (million euro) | 2 038      | 5 741      | 6 863      | 7 149      |
|                                                                           | (% of GDP)     | 0.7        | 1.8        | 2.1        | 2.2        |

## GDP, government deficit/surplus and debt in the EU (in national currencies)

|                                                                           |                | 2011      | 2012      | 2013      | 2014      |
|---------------------------------------------------------------------------|----------------|-----------|-----------|-----------|-----------|
| <b>Poland</b>                                                             |                |           |           |           |           |
| GDP mp                                                                    | (million PLN)  | 1 553 582 | 1 615 894 | 1 662 678 | 1 728 677 |
| Government deficit (-) / surplus (+)                                      | (million PLN)  | -76 174   | -60 433   | -66 735   | -55 241   |
|                                                                           | (% of GDP)     | -4.9      | -3.7      | -4.0      | -3.2      |
| Government expenditure                                                    | (% of GDP)     | 43.9      | 42.9      | 42.2      | 41.8      |
| Government revenue                                                        | (% of GDP)     | 39.0      | 39.2      | 38.2      | 38.6      |
| Government debt                                                           | (million PLN)  | 851 429   | 878 415   | 926 115   | 866 501   |
|                                                                           | (% of GDP)     | 54.8      | 54.4      | 55.7      | 50.1      |
| memo: intergovernmental lending<br>in the context of the financial crisis | (million PLN)  | 0         | 0         | 0         | 0         |
|                                                                           | (% of GDP)     | 0.0       | 0.0       | 0.0       | 0.0       |
| <b>Portugal</b>                                                           |                |           |           |           |           |
| GDP mp                                                                    | (million euro) | 176 167   | 168 398   | 169 395   | 173 053   |
| Government deficit (-) / surplus (+)                                      | (million euro) | -12 967   | -9 450    | -8 181    | -7 717    |
|                                                                           | (% of GDP)     | -7.4      | -5.6      | -4.8      | -4.5      |
| Government expenditure                                                    | (% of GDP)     | 50.0      | 48.5      | 50.1      | 49.0      |
| Government revenue                                                        | (% of GDP)     | 42.6      | 42.9      | 45.2      | 44.5      |
| Government debt                                                           | (million euro) | 195 690   | 211 784   | 219 645   | 225 280   |
|                                                                           | (% of GDP)     | 111.1     | 125.8     | 129.7     | 130.2     |
| memo: intergovernmental lending<br>in the context of the financial crisis | (million euro) | 1 212     | 1 119     | 1 119     | 1 119     |
|                                                                           | (% of GDP)     | 0.7       | 0.7       | 0.7       | 0.6       |
| <b>Romania</b>                                                            |                |           |           |           |           |
| GDP mp                                                                    | (million RON)  | 565 097   | 596 682   | 637 583   | 666 637   |
| Government deficit (-) / surplus (+)                                      | (million RON)  | -30 210   | -17 467   | -13 906   | -9 921    |
|                                                                           | (% of GDP)     | -5.3      | -2.9      | -2.2      | -1.5      |
| Government expenditure                                                    | (% of GDP)     | 39.1      | 36.4      | 35.2      | 34.9      |
| Government revenue                                                        | (% of GDP)     | 33.8      | 33.5      | 33.0      | 33.4      |
| Government debt                                                           | (million RON)  | 193 201   | 222 796   | 242 194   | 265 391   |
|                                                                           | (% of GDP)     | 34.2      | 37.3      | 38.0      | 39.8      |
| memo: intergovernmental lending<br>in the context of the financial crisis | (million RON)  | 0         | 0         | 0         | 0         |
|                                                                           | (% of GDP)     | 0.0       | 0.0       | 0.0       | 0.0       |
| <b>Slovenia</b>                                                           |                |           |           |           |           |
| GDP mp                                                                    | (million euro) | 36 868    | 36 006    | 36 144    | 37 246    |
| Government deficit (-) / surplus (+)                                      | (million euro) | -2 451    | -1 445    | -5 380    | -1 819    |
|                                                                           | (% of GDP)     | -6.6      | -4.0      | -14.9     | -4.9      |
| Government expenditure                                                    | (% of GDP)     | 50.0      | 48.6      | 59.9      | 49.8      |
| Government revenue                                                        | (% of GDP)     | 43.3      | 44.6      | 45.0      | 45.0      |
| Government debt                                                           | (million euro) | 17 134    | 19 336    | 25 427    | 30 133    |
|                                                                           | (% of GDP)     | 46.5      | 53.7      | 70.3      | 80.9      |
| memo: intergovernmental lending<br>in the context of the financial crisis | (million euro) | 325       | 972       | 1 162     | 1 210     |
|                                                                           | (% of GDP)     | 0.9       | 2.7       | 3.2       | 3.2       |
| <b>Slovakia</b>                                                           |                |           |           |           |           |
| GDP mp                                                                    | (million euro) | 70 160    | 72 185    | 73 593    | 75 215    |
| Government deficit (-) / surplus (+)                                      | (million euro) | -2 887    | -3 036    | -1 902    | -2 157    |
|                                                                           | (% of GDP)     | -4.1      | -4.2      | -2.6      | -2.9      |
| Government expenditure                                                    | (% of GDP)     | 40.6      | 40.2      | 41.0      | 41.8      |
| Government revenue                                                        | (% of GDP)     | 36.4      | 36.0      | 38.4      | 38.9      |
| Government debt                                                           | (million euro) | 30 480    | 37 614    | 40 174    | 40 297    |
|                                                                           | (% of GDP)     | 43.4      | 52.1      | 54.6      | 53.6      |
| memo: intergovernmental lending<br>in the context of the financial crisis | (million euro) | 173       | 1 494     | 1 895     | 1 997     |
|                                                                           | (% of GDP)     | 0.2       | 2.1       | 2.6       | 2.7       |



## GDP, government deficit/surplus and debt in the EU (in national currencies)

|                                                                                   |                      | 2011             | 2012             | 2013             | 2014             |
|-----------------------------------------------------------------------------------|----------------------|------------------|------------------|------------------|------------------|
| <b>Finland</b>                                                                    |                      |                  |                  |                  |                  |
| GDP mp                                                                            | (million euro)       | 196 869          | 199 793          | 201 995          | 204 015          |
| Government deficit (-) / surplus (+)                                              | (million euro)       | -1 999           | -4 240           | -5 122           | -6 435           |
|                                                                                   | (% of GDP)           | -1.0             | -2.1             | -2.5             | -3.2             |
| Government expenditure                                                            | (% of GDP)           | 54.4             | 56.1             | 57.8             | 58.7             |
| Government revenue                                                                | (% of GDP)           | 53.3             | 54.0             | 55.2             | 55.5             |
| Government debt                                                                   | (million euro)       | 95 490           | 105 667          | 112 682          | 121 050          |
|                                                                                   | (% of GDP)           | 48.5             | 52.9             | 55.8             | 59.3             |
| memo: intergovernmental lending<br>in the context of the financial crisis         | (million euro)       | 1 316            | 3 708            | 4 432            | 4 617            |
|                                                                                   | (% of GDP)           | 0.7              | 1.9              | 2.2              | 2.3              |
| <b>Sweden</b>                                                                     |                      |                  |                  |                  |                  |
| GDP mp                                                                            | (million SEK)        | 3 656 577        | 3 684 800        | 3 775 016        | 3 907 518        |
| Government deficit (-) / surplus (+)                                              | (million SEK)        | -2 893           | -34 097          | -51 821          | -73 684          |
|                                                                                   | (% of GDP)           | -0.1             | -0.9             | -1.4             | -1.9             |
| Government expenditure                                                            | (% of GDP)           | 51.4             | 52.6             | 53.3             | 53.0             |
| Government revenue                                                                | (% of GDP)           | 51.4             | 51.7             | 51.9             | 51.1             |
| Government debt                                                                   | (million SEK)        | 1 323 279        | 1 347 018        | 1 462 486        | 1 714 957        |
|                                                                                   | (% of GDP)           | 36.2             | 36.6             | 38.7             | 43.9             |
| memo: intergovernmental lending<br>in the context of the financial crisis         | (million SEK)        | 0                | 2 575            | 5 321            | 5 657            |
|                                                                                   | (% of GDP)           | 0.0              | 0.1              | 0.1              | 0.1              |
| <b>United Kingdom*</b>                                                            |                      |                  |                  |                  |                  |
| GDP mp                                                                            | (million GBP)        | 1 617 677        | 1 655 384        | 1 713 122        | 1 791 490        |
| Government deficit (-) / surplus (+)                                              | (million GBP)        | -123 540         | -137 607         | -98 330          | -101 798         |
|                                                                                   | (% of GDP)           | -7.6             | -8.3             | -5.7             | -5.7             |
| Government expenditure                                                            | (% of GDP)           | 46.9             | 47.0             | 45.5             | 44.4             |
| Government revenue                                                                | (% of GDP)           | 39.2             | 38.6             | 39.8             | 38.7             |
| Government debt                                                                   | (million GBP)        | 1 323 681        | 1 420 649        | 1 495 731        | 1 600 862        |
|                                                                                   | (% of GDP)           | 81.8             | 85.8             | 87.3             | 89.4             |
| memo: intergovernmental lending<br>in the context of the financial crisis         | (million GBP)        | 403              | 2 016            | 3 629            | 3 629            |
|                                                                                   | (% of GDP)           | 0.0              | 0.1              | 0.2              | 0.2              |
| <i>Financial year (fy)</i>                                                        |                      | <i>2011/2012</i> | <i>2012/2013</i> | <i>2013/2014</i> | <i>2014/2015</i> |
| <i>GDP mp</i>                                                                     | <i>(million GBP)</i> | <i>1 626 236</i> | <i>1 663 096</i> | <i>1 732 833</i> | <i>1 809 117</i> |
| <i>Government deficit (-) / surplus (+)</i>                                       | <i>(million GBP)</i> | <i>-124 656</i>  | <i>-126 036</i>  | <i>-101 595</i>  | <i>-93 484</i>   |
|                                                                                   | <i>(% of GDP)</i>    | <i>-7.7</i>      | <i>-7.6</i>      | <i>-5.9</i>      | <i>-5.2</i>      |
| <i>Government debt</i>                                                            | <i>(million GBP)</i> | <i>1 345 202</i> | <i>1 420 611</i> | <i>1 521 156</i> | <i>1 599 306</i> |
|                                                                                   | <i>(% of GDP)</i>    | <i>82.7</i>      | <i>85.4</i>      | <i>87.8</i>      | <i>88.4</i>      |
| <i>memo: intergovernmental lending<br/>in the context of the financial crisis</i> | <i>(million GBP)</i> | <i>1 210</i>     | <i>2 823</i>     | <i>3 629</i>     | <i>3 629</i>     |
|                                                                                   | <i>(% of GDP)</i>    | <i>0.1</i>       | <i>0.2</i>       | <i>0.2</i>       | <i>0.2</i>       |

\* Data refer to calendar years. Data referring to the financial year (1 April to 31 March), are shown in italics. For the United Kingdom, the relevant data for implementation of the excessive deficit procedure are financial year data.

## Main revisions between the October 2014 and the April 2015 notifications

Below are shown country specific explanations for the largest revisions in deficit and debt for 2011-2013 between the October 2014 and the April 2015 notifications, as well as in GDP.

Since the October 2014 notification, there have been revisions of the 2013 government balance of less than  $\pm 0.2$  percentage points of GDP in twenty-three Member States. Larger revisions have been reported of -0.3 pp in Denmark and Slovenia, of +0.2 pp in Luxembourg, of +0.3 pp in Estonia and of +0.4 pp in Bulgaria.

### Deficit

**Belgium:** The increase in the deficit for 2011 is due to the fact that a financial transaction related to a bank nationalisation has been reclassified as a non-financial transaction.

**Bulgaria:** The decrease in the deficit for 2013 is mainly due to updated source data for VAT and income taxes.

**Czech Republic:** The decrease in the deficit for 2011 to 2013 is due to the reclassification of units in the central government sub-sector.

**Denmark:** The decrease in the deficit for 2012 and the increase for 2013 are mainly due to updated source data for taxes, extra-budgetary units and the local government sub-sector.

**Estonia:** The decrease in the deficit for 2013 is due to the reclassification of units in the general government sector.

**Croatia:** The decrease in the deficit for 2012 is mainly due to the reclassification of a unit in the general government sector.

**Luxembourg:** The increase in the surplus for 2013 is mainly due to the correction of investment expenses of the local government sub-sector.

**Slovenia:** The increase in the deficit for 2011 to 2013 is mainly due to the revision of the recording of EU flows.

### Debt

**Czech Republic:** The decrease in the debt for 2011 to 2013 is mainly due to the consolidation of flows relating to the reclassification of units in the central government sub-sector.

**Croatia:** The increase in the debt for 2011 to 2013 is mainly due to the reclassification of a unit in the general government sector.

**Luxembourg:** The increase in the debt for 2011 to 2013 is due to the reclassification of a unit in the general government sector.

### GDP

The GDP for 2013 notified in April 2015 for EDP purposes was revised by a number of Member States compared with that notified in October 2014, in general by small amounts. A decrease of about 0.8% of GDP for 2012 and of about 0.6% for 2013 has been notified by Italy, while Portugal notified a decrease of about 0.8% for 2012 and of about 1.1% for 2013. Changes in GDP affect deficit and debt ratios due to the denominator effect.

**Revisions in government deficit/surplus and government debt ratios – pp of GDP**  
from the October 2014 to the April 2015 notification

|                |                                                    | Deficit/surplus* |             |             | Debt**      |             |             |
|----------------|----------------------------------------------------|------------------|-------------|-------------|-------------|-------------|-------------|
|                |                                                    | 2011             | 2012        | 2013        | 2011        | 2012        | 2013        |
| Belgium        | <b>Revision in deficit/surplus and debt ratios</b> | <b>-0.2</b>      | <b>0.0</b>  | <b>0.0</b>  | <b>-0.1</b> | <b>-0.1</b> | <b>-0.1</b> |
|                | - due to revision of deficit/surplus or debt       | -0.2             | 0.0         | 0.0         | -0.1        | -0.1        | -0.1        |
|                | - due to revision of GDP                           | 0.0              | 0.0         | 0.0         | 0.0         | 0.0         | 0.0         |
| Bulgaria       | <b>Revision in deficit/surplus and debt ratios</b> | <b>0.0</b>       | <b>-0.1</b> | <b>0.4</b>  | <b>0.0</b>  | <b>0.0</b>  | <b>0.0</b>  |
|                | - due to revision of deficit/surplus or debt       | 0.0              | -0.1        | 0.4         | 0.0         | 0.0         | 0.0         |
|                | - due to revision of GDP                           | 0.0              | 0.0         | 0.0         | 0.0         | 0.0         | 0.0         |
| Czech Republic | <b>Revision in deficit/surplus and debt ratios</b> | <b>0.2</b>       | <b>0.1</b>  | <b>0.1</b>  | <b>-1.1</b> | <b>-0.9</b> | <b>-0.7</b> |
|                | - due to revision of deficit/surplus or debt       | 0.2              | 0.1         | 0.1         | -1.1        | -0.9        | -0.7        |
|                | - due to revision of GDP                           | 0.0              | 0.0         | 0.0         | 0.0         | 0.0         | 0.0         |
| Denmark        | <b>Revision in deficit/surplus and debt ratios</b> | <b>0.0</b>       | <b>0.3</b>  | <b>-0.3</b> | <b>0.0</b>  | <b>-0.1</b> | <b>0.0</b>  |
|                | - due to revision of deficit/surplus or debt       | 0.0              | 0.2         | -0.3        | 0.0         | 0.0         | -0.1        |
|                | - due to revision of GDP                           | 0.0              | 0.0         | 0.0         | 0.0         | -0.1        | 0.1         |
| Germany        | <b>Revision in deficit/surplus and debt ratios</b> | <b>0.0</b>       | <b>0.0</b>  | <b>0.0</b>  | <b>0.2</b>  | <b>0.2</b>  | <b>0.2</b>  |
|                | - due to revision of deficit/surplus or debt       | 0.0              | 0.0         | 0.0         | 0.2         | 0.2         | 0.2         |
|                | - due to revision of GDP                           | 0.0              | 0.0         | 0.0         | 0.0         | 0.0         | 0.0         |
| Estonia        | <b>Revision in deficit/surplus and debt ratios</b> | <b>0.1</b>       | <b>0.1</b>  | <b>0.3</b>  | <b>0.0</b>  | <b>0.0</b>  | <b>0.0</b>  |
|                | - due to revision of deficit/surplus or debt       | 0.1              | 0.1         | 0.3         | 0.0         | 0.0         | 0.0         |
|                | - due to revision of GDP                           | 0.0              | 0.0         | 0.0         | 0.0         | 0.0         | 0.0         |
| Ireland        | <b>Revision in deficit/surplus and debt ratios</b> | <b>-0.1</b>      | <b>-0.1</b> | <b>-0.1</b> | <b>0.0</b>  | <b>0.0</b>  | <b>-0.1</b> |
|                | - due to revision of deficit/surplus or debt       | -0.1             | -0.1        | -0.1        | 0.0         | 0.0         | -0.1        |
|                | - due to revision of GDP                           | 0.0              | 0.0         | 0.0         | 0.0         | 0.0         | 0.0         |
| Greece         | <b>Revision in deficit/surplus and debt ratios</b> | <b>-0.1</b>      | <b>-0.1</b> | <b>-0.1</b> | <b>0.0</b>  | <b>0.0</b>  | <b>0.0</b>  |
|                | - due to revision of deficit/surplus or debt       | -0.1             | -0.1        | -0.1        | 0.0         | 0.0         | 0.0         |
|                | - due to revision of GDP                           | 0.0              | 0.0         | 0.0         | 0.0         | 0.0         | 0.0         |
| Spain          | <b>Revision in deficit/surplus and debt ratios</b> | <b>0.0</b>       | <b>0.0</b>  | <b>0.0</b>  | <b>0.0</b>  | <b>0.0</b>  | <b>0.0</b>  |
|                | - due to revision of deficit/surplus or debt       | 0.0              | 0.0         | 0.0         | 0.0         | 0.0         | 0.0         |
|                | - due to revision of GDP                           | 0.0              | 0.0         | 0.0         | 0.0         | 0.0         | 0.0         |
| France         | <b>Revision in deficit/surplus and debt ratios</b> | <b>0.0</b>       | <b>0.0</b>  | <b>0.0</b>  | <b>0.2</b>  | <b>0.3</b>  | <b>0.1</b>  |
|                | - due to revision of deficit/surplus or debt       | 0.0              | 0.1         | 0.0         | 0.2         | 0.2         | 0.2         |
|                | - due to revision of GDP                           | 0.0              | 0.0         | 0.0         | 0.0         | 0.2         | -0.1        |
| Croatia        | <b>Revision in deficit/surplus and debt ratios</b> | <b>0.1</b>       | <b>0.3</b>  | <b>-0.1</b> | <b>3.8</b>  | <b>4.8</b>  | <b>4.9</b>  |
|                | - due to revision of deficit/surplus or debt       | 0.1              | 0.3         | -0.1        | 3.8         | 4.8         | 4.9         |
|                | - due to revision of GDP                           | 0.0              | 0.0         | 0.0         | 0.0         | 0.0         | 0.0         |
| Italy          | <b>Revision in deficit/surplus and debt ratios</b> | <b>0.0</b>       | <b>0.0</b>  | <b>-0.1</b> | <b>0.0</b>  | <b>0.9</b>  | <b>0.7</b>  |
|                | - due to revision of deficit/surplus or debt       | 0.0              | 0.0         | -0.1        | 0.0         | -0.1        | -0.1        |
|                | - due to revision of GDP                           | 0.0              | 0.0         | 0.0         | 0.0         | 1.0         | 0.8         |
| Cyprus         | <b>Revision in deficit/surplus and debt ratios</b> | <b>0.0</b>       | <b>0.0</b>  | <b>0.0</b>  | <b>0.0</b>  | <b>0.0</b>  | <b>0.0</b>  |
|                | - due to revision of deficit/surplus or debt       | 0.0              | 0.0         | 0.0         | 0.0         | 0.0         | 0.0         |
|                | - due to revision of GDP                           | 0.0              | 0.0         | 0.0         | 0.0         | 0.0         | 0.0         |
| Latvia         | <b>Revision in deficit/surplus and debt ratios</b> | <b>0.1</b>       | <b>0.0</b>  | <b>0.1</b>  | <b>0.0</b>  | <b>0.0</b>  | <b>0.0</b>  |
|                | - due to revision of deficit/surplus or debt       | 0.1              | 0.0         | 0.1         | 0.0         | 0.0         | 0.0         |
|                | - due to revision of GDP                           | 0.0              | 0.0         | 0.0         | 0.0         | 0.0         | 0.0         |
| Lithuania      | <b>Revision in deficit/surplus and debt ratios</b> | <b>0.0</b>       | <b>0.0</b>  | <b>0.0</b>  | <b>-0.1</b> | <b>-0.1</b> | <b>-0.2</b> |
|                | - due to revision of deficit/surplus or debt       | 0.0              | 0.0         | 0.0         | -0.1        | -0.1        | -0.2        |
|                | - due to revision of GDP                           | 0.0              | 0.0         | 0.0         | 0.0         | 0.0         | 0.0         |

\* Revisions to deficit/surplus ratios: a positive sign means an improved government balance relative to GDP, and a negative sign a worsening.

\*\* Revisions to debt ratios: a positive sign means a higher government debt relative to GDP, and a negative sign a lower debt.

**Revisions in government deficit/surplus and government debt ratios – pp of GDP**  
from the October 2014 to the April 2015 notification

|                |                                                    | Deficit/surplus* |             |             | Debt**      |             |             |
|----------------|----------------------------------------------------|------------------|-------------|-------------|-------------|-------------|-------------|
|                |                                                    | 2011             | 2012        | 2013        | 2011        | 2012        | 2013        |
| Luxembourg     | <b>Revision in deficit/surplus and debt ratios</b> | <b>0.1</b>       | <b>0.1</b>  | <b>0.2</b>  | <b>0.6</b>  | <b>0.5</b>  | <b>0.5</b>  |
|                | - due to revision of deficit/surplus or debt       | 0.1              | 0.1         | 0.2         | 0.6         | 0.5         | 0.5         |
|                | - due to revision of GDP                           | 0.0              | 0.0         | 0.0         | 0.0         | 0.0         | 0.0         |
| Hungary        | <b>Revision in deficit/surplus and debt ratios</b> | <b>0.0</b>       | <b>0.0</b>  | <b>0.0</b>  | <b>0.0</b>  | <b>0.0</b>  | <b>0.0</b>  |
|                | - due to revision of deficit/surplus or debt       | 0.0              | 0.0         | 0.0         | 0.0         | 0.0         | 0.0         |
|                | - due to revision of GDP                           | 0.0              | 0.0         | 0.0         | 0.0         | 0.0         | 0.0         |
| Malta          | <b>Revision in deficit/surplus and debt ratios</b> | <b>0.1</b>       | <b>0.0</b>  | <b>0.1</b>  | <b>-0.1</b> | <b>-0.4</b> | <b>-0.6</b> |
|                | - due to revision of deficit/surplus or debt       | 0.1              | 0.0         | 0.1         | 0.0         | 0.0         | 0.0         |
|                | - due to revision of GDP                           | 0.0              | 0.0         | 0.0         | -0.1        | -0.4        | -0.6        |
| Netherlands    | <b>Revision in deficit/surplus and debt ratios</b> | <b>0.0</b>       | <b>0.0</b>  | <b>0.0</b>  | <b>0.0</b>  | <b>0.0</b>  | <b>0.0</b>  |
|                | - due to revision of deficit/surplus or debt       | 0.0              | 0.0         | 0.0         | 0.0         | 0.0         | 0.0         |
|                | - due to revision of GDP                           | 0.0              | 0.0         | 0.0         | 0.0         | 0.0         | 0.0         |
| Austria        | <b>Revision in deficit/surplus and debt ratios</b> | <b>0.1</b>       | <b>0.1</b>  | <b>0.2</b>  | <b>0.0</b>  | <b>-0.2</b> | <b>-0.3</b> |
|                | - due to revision of deficit/surplus or debt       | 0.1              | 0.1         | 0.2         | 0.0         | -0.2        | -0.3        |
|                | - due to revision of GDP                           | 0.0              | 0.0         | 0.0         | 0.0         | 0.0         | 0.0         |
| Poland         | <b>Revision in deficit/surplus and debt ratios</b> | <b>0.0</b>       | <b>0.0</b>  | <b>0.0</b>  | <b>0.0</b>  | <b>0.0</b>  | <b>0.0</b>  |
|                | - due to revision of deficit/surplus or debt       | 0.0              | 0.0         | 0.0         | 0.0         | 0.0         | 0.0         |
|                | - due to revision of GDP                           | 0.0              | 0.0         | 0.0         | 0.0         | 0.0         | 0.0         |
| Portugal       | <b>Revision in deficit/surplus and debt ratios</b> | <b>0.0</b>       | <b>-0.1</b> | <b>0.0</b>  | <b>0.0</b>  | <b>0.9</b>  | <b>1.6</b>  |
|                | - due to revision of deficit/surplus or debt       | 0.0              | -0.1        | 0.1         | 0.0         | 0.0         | 0.2         |
|                | - due to revision of GDP                           | 0.0              | 0.0         | -0.1        | 0.0         | 0.9         | 1.4         |
| Romania        | <b>Revision in deficit/surplus and debt ratios</b> | <b>0.1</b>       | <b>0.0</b>  | <b>0.0</b>  | <b>0.0</b>  | <b>0.0</b>  | <b>0.1</b>  |
|                | - due to revision of deficit/surplus or debt       | 0.1              | 0.0         | 0.1         | 0.0         | 0.0         | 0.0         |
|                | - due to revision of GDP                           | 0.0              | 0.0         | 0.0         | 0.0         | 0.0         | 0.1         |
| Slovenia       | <b>Revision in deficit/surplus and debt ratios</b> | <b>-0.4</b>      | <b>-0.3</b> | <b>-0.3</b> | <b>0.3</b>  | <b>0.3</b>  | <b>0.0</b>  |
|                | - due to revision of deficit/surplus or debt       | -0.4             | -0.3        | -0.3        | 0.3         | 0.3         | 0.0         |
|                | - due to revision of GDP                           | 0.0              | 0.0         | 0.0         | 0.0         | 0.0         | 0.0         |
| Slovakia       | <b>Revision in deficit/surplus and debt ratios</b> | <b>0.0</b>       | <b>0.0</b>  | <b>0.0</b>  | <b>0.0</b>  | <b>0.0</b>  | <b>0.0</b>  |
|                | - due to revision of deficit/surplus or debt       | 0.0              | 0.0         | 0.0         | 0.0         | 0.0         | 0.0         |
|                | - due to revision of GDP                           | 0.0              | 0.0         | 0.0         | 0.0         | 0.0         | 0.0         |
| Finland        | <b>Revision in deficit/surplus and debt ratios</b> | <b>0.0</b>       | <b>0.0</b>  | <b>-0.1</b> | <b>0.0</b>  | <b>-0.1</b> | <b>-0.2</b> |
|                | - due to revision of deficit/surplus or debt       | 0.0              | 0.0         | -0.1        | 0.0         | 0.1         | 0.0         |
|                | - due to revision of GDP                           | 0.0              | 0.0         | 0.0         | 0.0         | -0.2        | -0.2        |
| Sweden         | <b>Revision in deficit/surplus and debt ratios</b> | <b>0.0</b>       | <b>0.0</b>  | <b>0.0</b>  | <b>0.1</b>  | <b>0.2</b>  | <b>0.2</b>  |
|                | - due to revision of deficit/surplus or debt       | 0.0              | 0.0         | 0.0         | 0.1         | 0.2         | 0.2         |
|                | - due to revision of GDP                           | 0.0              | 0.0         | 0.0         | 0.0         | 0.0         | 0.0         |
| United Kingdom | <b>Revision in deficit/surplus and debt ratios</b> | <b>-0.1</b>      | <b>0.0</b>  | <b>0.1</b>  | <b>0.0</b>  | <b>0.0</b>  | <b>0.1</b>  |
|                | - due to revision of deficit/surplus or debt       | -0.1             | 0.0         | 0.1         | 0.0         | 0.0         | 0.1         |
|                | - due to revision of GDP                           | 0.0              | 0.0         | 0.0         | 0.0         | 0.0         | 0.0         |
| EU28           | <b>Revision in deficit/surplus and debt ratios</b> | <b>0.0</b>       | <b>0.0</b>  | <b>0.0</b>  | <b>0.1</b>  | <b>0.2</b>  | <b>0.1</b>  |
|                | - due to revision of deficit/surplus or debt       | 0.0              | 0.0         | 0.0         | 0.1         | 0.1         | 0.1         |
|                | - due to revision of GDP                           | 0.0              | 0.0         | 0.0         | 0.0         | 0.1         | 0.1         |
| EA19           | <b>Revision in deficit/surplus and debt ratios</b> | <b>0.0</b>       | <b>0.0</b>  | <b>0.0</b>  | <b>0.1</b>  | <b>0.2</b>  | <b>0.2</b>  |
|                | - due to revision of deficit/surplus or debt       | 0.0              | 0.0         | 0.0         | 0.1         | 0.1         | 0.1         |
|                | - due to revision of GDP                           | 0.0              | 0.0         | 0.0         | 0.0         | 0.2         | 0.1         |

\* Revisions to deficit/surplus ratios: a positive sign means an improved government balance relative to GDP, and a negative sign a worsening.

\*\* Revisions to debt ratios: a positive sign means a higher government debt relative to GDP, and a negative sign a lower debt.

## Annex

### Quarterly government debt

This annex on quarterly general government gross debt contains data on the structure of the outstanding debt by component of the **euro area** and **EU28** for the fourth quarter of 2014 as well as changes in the government debt ratio as compared to the third quarter of 2014.

From the end of the third quarter to the end of the fourth quarter of 2014, the government debt to GDP ratio in the **euro area** (EA19) decreased slightly from 92.0% to 91.9% of GDP. In the **EU28** the ratio remained unchanged at 86.8%.

**Table 1: Quarterly government debt structure, 2014 Q4 compared with 2014 Q3\***

|                                                                        |                                 | 2014 Q3           | 2014 Q4    |            |
|------------------------------------------------------------------------|---------------------------------|-------------------|------------|------------|
| <b>EA19</b>                                                            | Government debt                 | (million euro)    | 9 260 046  | 9 292 618  |
|                                                                        |                                 | (% of GDP)        | 92.0       | 91.9       |
|                                                                        | Of which: Currency and deposits | (million euro)    | 263 139    | 274 304    |
|                                                                        |                                 | (% of total debt) | 2.8        | 3.0        |
|                                                                        | Securities other than shares    | (million euro)    | 7 326 699  | 7 319 380  |
|                                                                        |                                 | (% of total debt) | 79.1       | 78.8       |
|                                                                        | Loans                           | (million euro)    | 1 670 206  | 1 698 933  |
|                                                                        | (% of total debt)               | 18.0              | 18.3       |            |
| Memo: Intergovernmental lending in the context of the financial crisis | (million euro)                  | 240 533           | 240 533    |            |
|                                                                        | (% of GDP)                      | 2.4               | 2.4        |            |
| <b>EU28</b>                                                            | Government debt                 | (million euro)    | 12 000 442 | 12 094 614 |
|                                                                        |                                 | (% of GDP)        | 86.8       | 86.8       |
|                                                                        | Of which: Currency and deposits | (million euro)    | 445 655    | 468 664    |
|                                                                        |                                 | (% of total debt) | 3.7        | 3.9        |
|                                                                        | Securities other than shares    | (million euro)    | 9 703 859  | 9 737 373  |
|                                                                        |                                 | (% of total debt) | 80.9       | 80.5       |
|                                                                        | Loans                           | (million euro)    | 1 850 926  | 1 888 576  |
|                                                                        | (% of total debt)               | 15.4              | 15.6       |            |
| Memo: Intergovernmental lending in the context of the financial crisis | (million euro)                  | 246 200           | 246 194    |            |
|                                                                        | (% of GDP)                      | 1.8               | 1.8        |            |

\* Quarterly GDP figures for the EU28 and EA19 have been benchmarked to the most up-to-date annual GDP figures.

Compared with the third quarter of 2014, sixteen Member States registered an increase in their debt to GDP ratio at the end of the fourth quarter of 2014 and twelve a decrease. The highest increases in the ratio were recorded in **Bulgaria** (+4.0 percentage points – pp), **Austria** (+3.7 pp), **Sweden** (+3.5 pp) and **Slovenia** (+3.2 pp) and the largest decreases in **Ireland** (-4.6 pp), **Malta** (-3.6 pp) and **Hungary** (-3.1 pp).

**Figure 1: Changes in government debt to GDP\* ratio, 2014 Q4 compared with 2014 Q3, in percentage points**

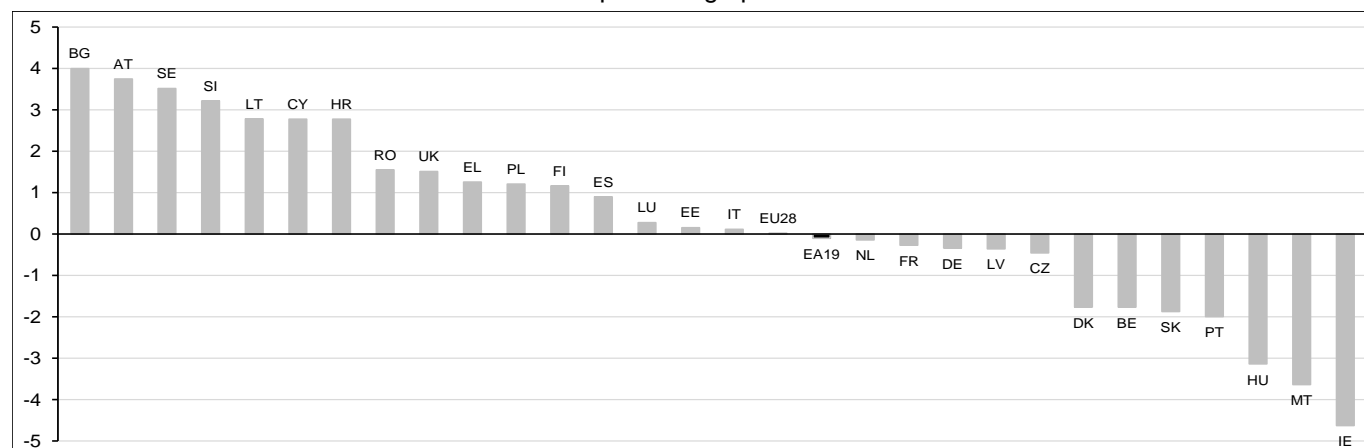

\* Quarterly GDP figures for the EU28, EA19, France and Poland have been benchmarked to the most up-to-date annual GDP figures by Eurostat. For Luxembourg, for 2014 Q4 annual GDP supplied in the context of the Excessive Deficit Procedure was used.

**Table 2: Quarterly government debt by Member State**

|                       |      | Millions of national currency |            | % of GDP |         | Difference in pp of GDP, 2014 Q4 compared with 2014 Q3 |
|-----------------------|------|-------------------------------|------------|----------|---------|--------------------------------------------------------|
|                       |      | 2014 Q3                       | 2014 Q4    | 2014 Q3  | 2014 Q4 |                                                        |
| <b>Belgium</b>        | euro | 433 663                       | 428 365    | 108.2    | 106.5   | -1.8                                                   |
| <b>Bulgaria</b>       | BGN  | 19 340                        | 22 694     | 23.6     | 27.6    | 4.0                                                    |
| <b>Czech Republic</b> | CZK  | 1 821 584                     | 1 816 137  | 43.0     | 42.6    | -0.5                                                   |
| <b>Denmark</b>        | DKK  | 895 334                       | 867 947    | 47.0     | 45.2    | -1.8                                                   |
| <b>Germany</b>        | euro | 2 162 668                     | 2 170 000  | 75.1     | 74.7    | -0.3                                                   |
| <b>Estonia</b>        | euro | 2 018                         | 2 073      | 10.5     | 10.6    | 0.2                                                    |
| <b>Ireland</b>        | euro | 208 208                       | 203 319    | 114.3    | 109.7   | -4.6                                                   |
| <b>Greece</b>         | euro | 315 462                       | 317 094    | 175.8    | 177.1   | 1.3                                                    |
| <b>Spain</b>          | euro | 1 020 303                     | 1 033 857  | 96.8     | 97.7    | 0.9                                                    |
| <b>France*</b>        | euro | 2 035 429                     | 2 037 772  | 95.3     | 95.0    | -0.3                                                   |
| <b>Croatia**</b>      | HRK  | 270 038                       | 279 569    | 82.2     | 85.0    | 2.8                                                    |
| <b>Italy</b>          | euro | 2 133 306                     | 2 134 920  | 132.0    | 132.1   | 0.1                                                    |
| <b>Cyprus</b>         | euro | 18 428                        | 18 819     | 104.7    | 107.5   | 2.8                                                    |
| <b>Latvia</b>         | euro | 9 635                         | 9 633      | 40.4     | 40.0    | -0.4                                                   |
| <b>Lithuania</b>      | euro | 13 718                        | 14 826     | 38.1     | 40.9    | 2.8                                                    |
| <b>Luxembourg*</b>    | euro | 10 883                        | 11 123     | 23.3     | 23.6    | 0.3                                                    |
| <b>Hungary</b>        | HUF  | 25 103 247                    | 24 525 014 | 80.0     | 76.9    | -3.1                                                   |
| <b>Malta</b>          | euro | 5 627                         | 5 417      | 71.7     | 68.0    | -3.6                                                   |
| <b>Netherlands</b>    | euro | 448 892                       | 451 006    | 69.0     | 68.8    | -0.1                                                   |
| <b>Austria</b>        | euro | 264 707                       | 278 089    | 80.8     | 84.5    | 3.7                                                    |
| <b>Poland*</b>        | PLN  | 839 083                       | 866 502    | 48.9     | 50.1    | 1.2                                                    |
| <b>Portugal</b>       | euro | 228 918                       | 225 280    | 132.2    | 130.2   | -2.0                                                   |
| <b>Romania</b>        | RON  | 252 828                       | 265 391    | 38.3     | 39.8    | 1.6                                                    |
| <b>Slovenia</b>       | euro | 28 813                        | 30 133     | 77.7     | 80.9    | 3.2                                                    |
| <b>Slovakia</b>       | euro | 41 418                        | 40 297     | 55.4     | 53.6    | -1.9                                                   |
| <b>Finland</b>        | euro | 118 405                       | 121 050    | 58.2     | 59.3    | 1.2                                                    |
| <b>Sweden</b>         | SEK  | 1 562 084                     | 1 714 957  | 40.4     | 43.9    | 3.5                                                    |
| <b>United Kingdom</b> | GBP  | 1 558 170                     | 1 600 862  | 87.8     | 89.4    | 1.5                                                    |

\* Quarterly GDP figures for France and Poland have been benchmarked to the most up-to-date annual GDP figures by Eurostat. For Luxembourg, for 2014 Q4 annual GDP supplied in the context of the Excessive Deficit Procedure was used.

\*\* Provisional

Further data are available in the publication on quarterly government finance statistics:  
<http://ec.europa.eu/eurostat/web/government-finance-statistics/data>
